# Supplementary material for: Francisella tularensis subsp. holarctica Releases Differentially Loaded Outer Membrane Vesicles Under Various Stress Conditions
Source: Front Microbiol. 2019 Oct 10;10:2304. doi: 10.3389/fmicb.2019.02304 (PMC6795709; doi:10.3389/fmicb.2019.02304)
Supplement: TABLE S2 — List of proteins that were OMV enriched in comparison with membrane fraction. [file Table_2.xlsx]

## Sheet: Suppl. table header
		Supplementary table 2.	List of proteins that were OMV-enriched in comparison with membrane fraction. All significantly enriched proteins are reported that passed the two-sample Student’s t-test with the truncation resulting from permutation-based FDR (FDR=0.05, s0=2). Proteins with enrichment factor > 4 are highlighted. Bottom part of the table: List of OMV-exclusive proteins (not detected in the membrane fraction).

## Sheet: Supplementary table 2
iBAQ membrane 11-Ma	iBAQ membrane 11-Mb	iBAQ membranes 13-Ma	iBAQ membranes 13-Mb	iBAQ 10-OMVa	iBAQ 10-OMVb	iBAQ 12-OMVa	iBAQ 12-OMVb	Unique peptides	Unique sequence coverage [%]	Mol. weight [kDa]	Q-value	Score	MS/MS count	-Log Student's T-test p-value OMV_membrane	Student's T-test q-value OMV_membrane	Student's T-test Difference OMV_membrane	Student's T-test Test statistic OMV_membrane	Protein IDs	protein name	locus tag	gene	OMV/membrane enrichment factor	COG category	COG code	COG	COG name	COG definition	KEGG PATHWAY	KEGG definition	KO	eGG NOG HMM description	GO terms	Localization PSORT
-13.0551	-13.0893	-12.8916	-12.9254	-4.08455	-4.27652	-4.45031	-4.23546	20	93.9	19.477	0	323.31	1193	10.1103	0	8.72863	4.17766	AFT92056.1	outer membrane protein of unknown function [Francisella tularensis subsp. holarctica FSC200]	FTS_0008		424.208											Periplasmic
-14.5443	-15.4707	-14.9791	-14.7347	-7.00475	-6.71329	-6.99298	-7.05519	16	74.9	18.782	0	323.31	248	7.59964	0	7.99067	3.60795	AFT92453.1	outer membrane protein OmpH [Francisella tularensis subsp. holarctica FSC200]	FTS_0538	ompH	254.349	Cell wall/membrane/envelope biogenesis;Posttranslational modification, protein turnover, chaperones	M;O	COG2825	HlpA	Periplasmic chaperone for outer membrane proteins, Skp family		hlpA, outer membrane protein	K06142	Molecular chaperone that interacts specifically with outer membrane proteins, thus maintaining the solubility of early folding intermediates during passage through the periplasm (By similarity)	GO:0001530;GO:0003674;GO:0005488;GO:0005575;GO:0005622;GO:0005623;GO:0005737;GO:0005829;GO:0006457;GO:0006458;GO:0006810;GO:0006886;GO:0008104;GO:0008150;GO:0008152;GO:0008289;GO:0009279;GO:0009987;GO:0010468;GO:0010608;GO:0015031;GO:0016020;GO:0016043;GO:0016044;GO:0019222;GO:0019538;GO:0019867;GO:0022607;GO:0030288;GO:0030312;GO:0030313;GO:0031647;GO:0031975;GO:0032978;GO:0033036;GO:0034613;GO:…	Unknown
-14.1723	-14.0713	-14.2486	-13.7979	-5.94142	-5.87838	-6.33215	-6.35869	19	66.9	18.158	0	323.31	214	8.34429	0	7.94484	3.67765	AFT93152.1	hypothetical protein FTS_1462 [Francisella tularensis subsp. holarctica FSC200]	FTS_1462		246.397											Unknown
-11.5021	-11.322	-11.0608	-11.196	-4.27227	-4.20431	-4.31342	-4.34048	27	80.8	25.7	0	323.31	1171	9.27841	0	6.9876	3.32987	AFT92965.1	hypothetical protein FTS_1201 [Francisella tularensis subsp. holarctica FSC200]	FTS_1201		126.905											Unknown
-15.671	-15.1618	-15.8545	-14.6979	-8.41637	-8.52487	-8.24842	-8.2614	14	66.9	25.703	0	315.37	146	6.6632	0	6.98351	3.07729	AFT93208.1	hypothetical protein FTS_1538 [Francisella tularensis subsp. holarctica FSC200]	FTS_1538		126.545											Unknown
-16.9744	-17.0352	-17.0872	-17.0136	-10.5762	-10.116	-10.368	-10.3633	15	62.1	29.606	0	141.76	79	9.19679	0	6.67174	3.18156	AFT92421.1	hypothetical protein FTS_0495 [Francisella tularensis subsp. holarctica FSC200]	FTS_0495		101.952											Periplasmic
-15.5749	-16.1723	-15.4356	-15.2245	-9.00108	-9.01378	-8.86533	-8.85968	20	61.8	35.78	0	250.32	135	7.21739	0	6.66686	3.01995	AFT92477.1	hypothetical protein FTS_0572 [Francisella tularensis subsp. holarctica FSC200]	FTS_0572		101.607	Function unknown	S							Curli production assembly/transport component CsgG		Unknown
-14.9347	-14.0697	-15.2787	-14.276	-8.46503	-8.399	-8.44812	-8.48956	7	54.2	9.5596	0	142.01	79	6.22969	0	6.18935	2.71179	AFT92666.1	hypothetical protein FTS_0814 [Francisella tularensis subsp. holarctica FSC200]	FTS_0814		72.9761											Unknown
-14.5324	-14.7946	-14.9395	-15.0621	-8.72998	-8.59796	-8.71399	-8.78658	39	62.5	83.123	0	323.31	327	8.4083	0	6.12502	2.88837	AFT93168.1	chitinase family 18 protein [Francisella tularensis subsp. holarctica FSC200]	FTS_1485		69.7935	Carbohydrate transport and metabolism	G	COG3325	ChiA	Chitinase, GH18 family	Amino sugar and nucleotide sugar metabolism;Metabolic pathways	E3.2.1.14, chitinase [EC:3.2.1.14]	K01183	chitinase		Unknown
-15.1023	-15.064	-14.8963	-14.7942	-9.10135	-9.05055	-8.97675	-9.01446	34	80.8	33.057	0	323.31	187	9.49302	0	5.92844	2.85443	AFT92351.1	hypothetical protein FTS_0402 [Francisella tularensis subsp. holarctica FSC200]	FTS_0402		60.9028											Unknown
-11.6193	-11.6941	-11.6904	-11.6932	-5.91149	-5.87105	-5.8423	-5.76604	63	69.8	82.571	0	323.31	2009	11.4425	0	5.82653	2.86208	AFT93160.1	peroxidase/catalase [Francisella tularensis subsp. holarctica FSC200]	FTS_1471	katG	56.7492	Inorganic ion transport and metabolism	P	COG0376	KatG	Catalase (peroxidase I)	Biosynthesis of secondary metabolites;Metabolic pathways;Phenylalanine metabolism;Tryptophan metabolism	katG, catalase-peroxidase [EC:1.11.1.21]	K03782	Bifunctional enzyme with both catalase and broad- spectrum peroxidase activity (By similarity)	GO:0005575;GO:0005576;GO:0005623;GO:0042597;GO:0044464	Unknown
-19.0625	-18.2837	-19.5317	-18.0804	-12.838	-13.142	-12.8187	-12.8775	13	47	39.528	0	46.774	46	5.54494	0	5.82055	2.48034	AFT92071.1	histidine acid phosphatase [Francisella tularensis subsp. holarctica FSC200]	FTS_0029		56.5146	Signal transduction mechanisms	T							Major acid phosphatase Map		Extracellular
-14.1552	-13.8944	-14.0209	-13.9268	-8.6548	-8.57266	-8.14589	-8.18262	29	81.2	31.964	0	323.31	234	7.72799	0	5.61032	2.61737	AFT92715.1	beta-lactamase class A [Francisella tularensis subsp. holarctica FSC200]	FTS_0870	bla	48.8512	Defense mechanisms	V	COG2367	PenP	Beta-lactamase class A	beta-Lactam resistance;Biosynthesis of antibiotics	penP, beta-lactamase class A [EC:3.5.2.6]	K17836	Beta-lactamase (EC 3.5.2.6)	GO:0005575;GO:0005623;GO:0005886;GO:0016020;GO:0044464;GO:0071944	Periplasmic
-14.5842	-14.0729	-13.6728	-13.4124	-8.42288	-8.36408	-8.49647	-8.51743	21	55.7	49.673	0	323.31	232	6.15396	0	5.48535	2.42959	AFT93313.1	hypothetical protein FTS_1681 [Francisella tularensis subsp. holarctica FSC200]	FTS_1681		44.7977	Cell wall/membrane/envelope biogenesis	M	COG1520	PQQ	Outer membrane protein assembly factor BamB, contains PQQ-like beta-propeller repeat		bamB, outer membrane protein assembly factor BamB	K17713	Part of the outer membrane protein assembly complex, which is involved in assembly and insertion of beta-barrel proteins into the outer membrane (By similarity)	GO:0005575;GO:0005623;GO:0008104;GO:0008150;GO:0009279;GO:0009987;GO:0016020;GO:0016043;GO:0016044;GO:0019867;GO:0022607;GO:0030312;GO:0030313;GO:0031975;GO:0033036;GO:0034613;GO:0043163;GO:0043165;GO:0044085;GO:0044091;GO:0044462;GO:0044464;GO:0044699;GO:0044763;GO:0045229;GO:0051179;GO:0051205;GO:0051641;GO:0051668;GO:0061024;GO:0070727;GO:0071709;GO:0071840;GO:0071944	Unknown
-16.5827	-16.3729	-16.6202	-18.2298	-13.1107	-13.2745	-10.1011	-10.2616	3	63.6	7.6627	0	34.277	13	2.78828	0	5.26442	1.77208	AFT92624.1	hypothetical protein FTS_0755 [Francisella tularensis subsp. holarctica FSC200]	FTS_0755		38.437	Replication, recombination and repair	L	COG1722	XseB	Exonuclease VII small subunit	Mismatch repair	xseB, exodeoxyribonuclease VII small subunit [EC:3.1.11.6]	K03602			Unknown
-15.5859	-15.2073	-15.6181	-15.4567	-10.2255	-10.1866	-10.2127	-10.3093	27	52.1	65.134	0	323.31	124	8.5644	0	5.23347	2.49566	AFT92632.1	gamma-glutamyltranspeptidase [Francisella tularensis subsp. holarctica FSC200]	FTS_0764	ggt	37.621	Amino acid transport and metabolism	E	COG0405	Ggt	Gamma-glutamyltranspeptidase	Cyanoamino acid metabolism;Glutathione metabolism;Metabolic pathways;Taurine and hypotaurine metabolism	ggt, gamma-glutamyltranspeptidase / glutathione hydrolase [EC:2.3.2.2 3.4.19.13]	K00681	Gamma-glutamyltranspeptidase (EC 2.3.2.2)	GO:0003674;GO:0003824;GO:0003840;GO:0005575;GO:0005623;GO:0008150;GO:0008152;GO:0016740;GO:0016746;GO:0016755;GO:0042597;GO:0044464	Periplasmic
-20.6284	-18.3676	-18.8507	-18.0467	-14.3515	-14.1185	-13.4688	-13.3596	11	45.8	27.864	0	36.157	26	3.76255	0	5.14875	1.96147	AFT92675.1	rhodanese-like family protein [Francisella tularensis subsp. holarctica FSC200]	FTS_0824		35.4754	Inorganic ion transport and metabolism	P							Rhodanese domain protein		Unknown
-11.223	-11.4027	-11.6145	-11.4575	-6.50934	-6.35979	-6.11479	-6.12142	18	63.1	24.215	0	294.37	310	7.84863	0	5.14808	2.42183	AFT92198.1	pyrrolidone carboxylylate peptidase [Francisella tularensis subsp. holarctica FSC200]	FTS_0203	pcp	35.4589	Posttranslational modification, protein turnover, chaperones	O	COG2039	Pcp	Pyrrolidone-carboxylate peptidase (N-terminal pyroglutamyl peptidase)		pcp, pyroglutamyl-peptidase [EC:3.4.19.3]	K01304	Removes 5-oxoproline from various penultimate amino acid residues except L-proline (By similarity)	GO:0005575;GO:0005622;GO:0005623;GO:0005737;GO:0044424;GO:0044464	Unknown
-14.2071	-13.0811	-13.7618	-13.1847	-8.52543	-8.36621	-8.46601	-8.31821	15	68.9	20.965	0	189.79	95	5.89468	0	5.13974	2.2671	AFT93177.1	hypothetical protein FTS_1495 [Francisella tularensis subsp. holarctica FSC200]	FTS_1495		35.2545											Unknown
-17.6258	-16.5805	-17.7497	-17.3931	-12.3057	-12.2386	-12.2007	-12.2401	7	59.7	16.876	0	36.809	21	5.90245	0	5.09099	2.24891	AFT93015.1	hypothetical protein FTS_1272 [Francisella tularensis subsp. holarctica FSC200]	FTS_1272		34.0833											Unknown
-16.802	-16.5385	-16.3856	-16.212	-12.2898	-12.2536	-11.2131	-11.2191	51	69.1	87.25	0	323.31	183	5.15134	0	4.74063	2.03506	AFT92362.1	DNA topoisomerase I [Francisella tularensis subsp. holarctica FSC200]	FTS_0417	topA	26.7345	Replication, recombination and repair;Function unknown	L;S	COG0550;COG0551;COG1754	TopA;YrdD;COG1754	DNA topoisomerase IA, ssDNA-binding Zn-finger and Zn-ribbon domains of topoisomerase 1, Uncharacterized C-terminal domain of topoisomerase IA		topA, DNA topoisomerase I [EC:5.99.1.2]	K03168	Releases the supercoiling and torsional tension of DNA, which is introduced during the DNA replication and transcription, by transiently cleaving and rejoining one strand of the DNA duplex. Introduces a single-strand break via transesterification at a target site in duplex DNA. The scissile phosphodiester is attacked by the catalytic tyrosine of the enzyme, resulting in the formation of a DNA-(5'…	GO:0000287;GO:0003674;GO:0003824;GO:0003916;GO:0003917;GO:0005488;GO:0005575;GO:0005618;GO:0005622;GO:0005623;GO:0005737;GO:0005829;GO:0005886;GO:0006139;GO:0006259;GO:0006265;GO:0006725;GO:0006807;GO:0008150;GO:0008152;GO:0009987;GO:0016020;GO:0016853;GO:0019219;GO:0019222;GO:0022616;GO:0030312;GO:0031323;GO:0032069;GO:0032074;GO:0034641;GO:0040007;GO:0043086;GO:0043167;GO:0043169;GO:0043170;GO:…	Cytoplasmic
-14.0972	-14.7245	-14.3988	-13.6936	-9.69208	-9.80222	-9.67963	-9.12076	17	72.5	27.932	0	199.99	110	5.63301	0	4.65486	2.05252	AFT93194.1	protein-disulfide isomerase [Francisella tularensis subsp. holarctica FSC200]	FTS_1514		25.1914	Posttranslational modification, protein turnover, chaperones	O							DSBA-like thioredoxin domain	GO:0005575;GO:0005623;GO:0009279;GO:0016020;GO:0019867;GO:0030312;GO:0030313;GO:0031975;GO:0044462;GO:0044464;GO:0071944	Unknown
-21.6062	-19.8981	-19.2064	-21.6585	-17.593	-17.0188	-14.5965	-14.6937	10	28.4	52.245	0	35.432	22	2.45656	0	4.61679	1.54287	AFT92623.1	exodeoxyribonuclease VII large subunit [Francisella tularensis subsp. holarctica FSC200]	FTS_0754	xseA	24.5354	Replication, recombination and repair	L	COG1570	XseA	Exonuclease VII, large subunit	Mismatch repair	xseA, exodeoxyribonuclease VII large subunit [EC:3.1.11.6]	K03601	Bidirectionally degrades single-stranded DNA into large acid-insoluble oligonucleotides, which are then degraded further into small acid-soluble oligonucleotides (By similarity)	GO:0005575;GO:0005618;GO:0005622;GO:0005623;GO:0005737;GO:0030312;GO:0044424;GO:0044464;GO:0071944	Cytoplasmic
-12.3947	-12.2077	-12.7106	-12.2708	-8.03704	-8.17778	-7.5159	-7.63783	11	54.1	13.069	0	195.77	111	6.41411	0	4.55381	2.07612	AFT92667.1	hypothetical protein FTS_0815 [Francisella tularensis subsp. holarctica FSC200]	FTS_0815		23.4873											Unknown
-15.0067	-14.6842	-15.2672	-15.4089	-10.5195	-10.5077	-10.5439	-10.5935	23	56.7	56.039	0	322.61	134	6.89504	0	4.55059	2.10628	AFT92796.1	hypothetical protein FTS_0974 [Francisella tularensis subsp. holarctica FSC200]	FTS_0974		23.4349											Unknown
-17.3992	-15.2492	-15.5044	-14.8051	-11.4279	-11.2827	-11.0113	-11.0342	3	13.3	17.523	0	41.628	11	3.6422	0	4.55041	1.76333	AFT92061.1	single-strand DNA binding protein [Francisella tularensis subsp. holarctica FSC200]	FTS_0013	ssb	23.432	Replication, recombination and repair	L	COG0629	Ssb	Single-stranded DNA-binding protein	DNA replication;Homologous recombination;Mismatch repair	ssb, single-strand DNA-binding protein	K03111	single-stranded DNA-binding protein	GO:0000725;GO:0003674;GO:0003676;GO:0003677;GO:0003697;GO:0005488;GO:0006139;GO:0006259;GO:0006260;GO:0006281;GO:0006298;GO:0006310;GO:0006725;GO:0006807;GO:0006950;GO:0006974;GO:0007154;GO:0008150;GO:0008152;GO:0009058;GO:0009059;GO:0009432;GO:0009605;GO:0009987;GO:0009991;GO:0031668;GO:0033554;GO:0034641;GO:0034645;GO:0043170;GO:0043566;GO:0044237;GO:0044238;GO:0044249;GO:0044260;GO:0044699;GO:…	Cytoplasmic
-16.2955	-15.1007	-15.2531	-13.5757	-11.0559	-11.1156	-10.0287	-10.2143	5	22.7	15.816	0	35.876	34	3.40717	0	4.45262	1.69495	AFT93469.1	outer membrane lipoprotein [Francisella tularensis subsp. holarctica FSC200]	FTS_1885		21.8964	Cell wall/membrane/envelope biogenesis	M	COG3133	SlyB	Outer membrane lipoprotein SlyB		slyB, outer membrane lipoprotein SlyB	K06077	Inherit from NOG: outer membrane lipoprotein		Unknown
-13.0678	-12.8701	-11.8816	-11.7522	-8.09468	-7.9049	-8.10199	-8.06454	32	69	37.023	0	323.31	367	4.86042	0	4.35141	1.8602	AFT92096.1	hypothetical protein FTS_0065 [Francisella tularensis subsp. holarctica FSC200]	FTS_0065		20.4129											Cytoplasmic
-15.2218	-15.1452	-13.9898	-13.2283	-10.2273	-10.1648	-9.899	-10.0288	33	77.3	36.385	0	176.96	150	3.94448	0	4.31632	1.73615	AFT92383.1	hypothetical protein FTS_0452 [Francisella tularensis subsp. holarctica FSC200]	FTS_0452		19.9224											Cytoplasmic
-10.9791	-10.8537	-9.84549	-9.78747	-5.98547	-6.02633	-6.17884	-6.27564	18	81.7	22.451	0	323.31	649	4.90265	0	4.24987	1.82726	AFT92475.1	hypothetical protein FTS_0570 [Francisella tularensis subsp. holarctica FSC200]	FTS_0570		19.0255	Cell wall/membrane/envelope biogenesis	M	COG3417	LpoB	Outer membrane lipoprotein LpoB, binds and activates PBP1b		penicillin-binding protein activator	K07337	(Lipo)protein		Unknown
-13.1078	-12.9467	-13.0276	-12.7507	-8.81301	-8.92316	-8.71321	-8.42243	27	60.1	59.928	0	303.06	210	7.21938	0	4.24024	1.98891	AFT92546.1	hypothetical protein FTS_0659 [Francisella tularensis subsp. holarctica FSC200]	FTS_0659		18.899											Unknown
-13.3766	-13.2687	-13.6492	-13.816	-9.45209	-9.33053	-9.25267	-9.28553	11	61.8	25.258	0	113.3	114	7.18243	0	4.19742	1.96832	AFT92433.1	membrane protein of unknown function [Francisella tularensis subsp. holarctica FSC200]	FTS_0515	ttg2	18.3463	Lipid transport and metabolism	I	COG2854	MlaC	ABC-type transporter Mla maintaining outer membrane lipid asymmetry, periplasmic MlaC component	ABC transporters	mlaC, phospholipid transport system substrate-binding protein	K07323	Toluene tolerance, Ttg2		Unknown
-13.4765	-13.6668	-11.9136	-12.359	-8.48832	-8.67079	-8.65082	-8.92579	6	46.5	19.887	0	207.18	72	4.13016	0	4.17003	1.71222	AFT92327.1	superoxide dismutase (Cu-Zn) precursor [Francisella tularensis subsp. holarctica FSC200]	FTS_0371	sodC	18.0014	Inorganic ion transport and metabolism	P	COG2032	SodC	Cu/Zn superoxide dismutase		SOD1, superoxide dismutase, Cu-Zn family [EC:1.15.1.1]	K04565	Destroys radicals which are normally produced within the cells and which are toxic to biological systems (By similarity)	GO:0000302;GO:0000303;GO:0003674;GO:0003824;GO:0004784;GO:0005488;GO:0005507;GO:0005575;GO:0005623;GO:0006801;GO:0006950;GO:0006979;GO:0008150;GO:0008152;GO:0008270;GO:0009987;GO:0010035;GO:0016209;GO:0016491;GO:0016721;GO:0019430;GO:0030288;GO:0030312;GO:0030313;GO:0031975;GO:0033554;GO:0034599;GO:0034614;GO:0042221;GO:0042597;GO:0043167;GO:0043169;GO:0044237;GO:0044462;GO:0044464;GO:0044699;GO:…	Periplasmic
-14.6908	-14.679	-14.6386	-14.6908	-10.6483	-10.548	-10.4522	-10.5222	53	57.2	105.36	0	323.31	297	10.0999	0	4.13216	2.02312	AFT93368.1	hypothetical protein FTS_1749 [Francisella tularensis subsp. holarctica FSC200]	FTS_1749		17.5349	Carbohydrate transport and metabolism	G							Glycosyl hydrolases family 18	GO:0003674;GO:0003824;GO:0004553;GO:0004568;GO:0006022;GO:0006026;GO:0006030;GO:0006032;GO:0006040;GO:0006807;GO:0008150;GO:0008152;GO:0009056;GO:0009057;GO:0016787;GO:0016798;GO:0043170;GO:0046348;GO:0071704;GO:1901071;GO:1901072;GO:1901135;GO:1901136;GO:1901564;GO:1901565;GO:1901575	Unknown
-11.2929	-11.276	-10.4561	-10.2272	-6.86005	-6.66687	-6.62328	-6.68399	30	78.5	29.357	0	323.31	514	5.18927	0	4.10452	1.7994	AFT92829.1	FKBP-type peptidyl-prolyl cis-trans isomerase [Francisella tularensis subsp. holarctica FSC200]	FTS_1020		17.2022	Posttranslational modification, protein turnover, chaperones	O	COG0545	FkpA	FKBP-type peptidyl-prolyl cis-trans isomerase		fklB, FKBP-type peptidyl-prolyl cis-trans isomerase FklB [EC:5.2.1.8]	K03773	Peptidyl-prolyl cis-trans isomerase	GO:0005575;GO:0005576;GO:0005623;GO:0009279;GO:0016020;GO:0019867;GO:0030312;GO:0030313;GO:0031975;GO:0044462;GO:0044464;GO:0071944	OuterMembrane
-13.6581	-12.131	-11.939	-11.6519	-8.41472	-8.38785	-8.19398	-8.24075	10	78.7	17.923	0	174.29	162	3.95871	0	4.03566	1.64593	AFT92368.1	hypothetical protein FTS_0424 [Francisella tularensis subsp. holarctica FSC200]	FTS_0424		16.4005											Unknown
-12.9981	-12.1379	-11.9867	-11.0747	-8.30893	-8.18482	-7.88442	-7.99825	11	62.5	14.596	0	222.61	95	4.17795	0	3.95525	1.64452	AFT92117.1	hypothetical protein FTS_0092 [Francisella tularensis subsp. holarctica FSC200]	FTS_0092		15.5113	Function unknown	S							Protein of unknown function (DUF3568)		Unknown
-9.90223	-9.84322	-10.6126	-10.5538	-6.24361	-6.18417	-6.27014	-6.40235	52	83.8	51.977	0	323.31	1184	5.82706	0	3.9529	1.78792	AFT92476.1	hypothetical protein FTS_0571 [Francisella tularensis subsp. holarctica FSC200]	FTS_0571		15.4861	Function unknown	S							Inherit from proNOG: Periplasmic Protein		Unknown
-10.0084	-9.69943	-8.02973	-8.17893	-4.96275	-5.20291	-5.06901	-5.06551	12	70.3	12.214	0	323.31	194	3.57507	0	3.90407	1.55401	AFT92293.1	hypothetical protein FTS_0317 [Francisella tularensis subsp. holarctica FSC200]	FTS_0317		14.9707											Unknown
-11.6415	-11.217	-10.5438	-10.4982	-6.80619	-6.66954	-7.33638	-7.61455	21	61.1	19.303	0	323.31	321	4.45416	0	3.86847	1.643	AFT92359.1	hypothetical protein FTS_0414 [Francisella tularensis subsp. holarctica FSC200]	FTS_0414		14.6058											Unknown
-18.5516	-17.624	-17.4378	-16.8039	-14.0332	-14.0339	-13.5509	-13.5928	14	36.7	50.409	0	52.529	34	4.20486	0	3.80162	1.59386	AFT93159.1	dGTP triphosphohydrolase [Francisella tularensis subsp. holarctica FSC200]	FTS_1470	dgt	13.9444	Nucleotide transport and metabolism	F	COG0232	Dgt	dGTP triphosphohydrolase	Purine metabolism	dgt, dGTPase [EC:3.1.5.1]	K01129	deoxyguanosinetriphosphate triphosphohydrolase-like protein	GO:0003674;GO:0003824;GO:0006139;GO:0006725;GO:0006807;GO:0008150;GO:0008152;GO:0008832;GO:0009987;GO:0015949;GO:0016787;GO:0016788;GO:0016793;GO:0034641;GO:0042578;GO:0044237;GO:0044238;GO:0044281;GO:0044710;GO:0046483;GO:0055086;GO:0071704;GO:1901360	Cytoplasmic
-14.5405	-14.8147	-14.5191	-15.098	-10.7772	-10.8381	-11.0642	-11.2979	14	55.9	26.809	0	80.497	67	6.09098	0	3.74876	1.71922	AFT93482.1	peptide methionine sulfoxide reductase [Francisella tularensis subsp. holarctica FSC200]	FTS_1906	msrA	13.4428	Posttranslational modification, protein turnover, chaperones	O	COG0225	MsrA	Peptide methionine sulfoxide reductase MsrA		msrA, peptide-methionine (S)-S-oxide reductase [EC:1.8.4.11]	K07304	Has an important function as a repair enzyme for proteins that have been inactivated by oxidation. Catalyzes the reversible oxidation-reduction of methionine sulfoxide in proteins to methionine (By similarity)		Unknown
-13.2469	-12.8497	-12.2433	-12.437	-8.95215	-8.89457	-9.13648	-8.9584	2	25.2	12.73	0	32.365	17	5.44735	0	3.70883	1.66353	AFT92419.1	hypothetical protein FTS_0493 [Francisella tularensis subsp. holarctica FSC200]	FTS_0493		13.0758	Cell wall/membrane/envelope biogenesis	M							Outer membrane lipoprotein		Unknown
-14.8926	-14.5727	-13.3894	-13.6018	-10.2282	-10.1913	-10.5812	-10.7734	13	58.7	19.574	0	122.29	88	4.07646	0	3.6706	1.53469	AFT93440.1	outer membrane lipoprotein [Francisella tularensis subsp. holarctica FSC200]	FTS_1846	blc	12.7339	Cell wall/membrane/envelope biogenesis	M	COG3040	Blc	Bacterial lipocalin		APOD, apolipoprotein D and lipocalin family protein	K03098	Outer membrane lipoprotein	GO:0005575;GO:0005623;GO:0006950;GO:0006974;GO:0008150;GO:0009279;GO:0009987;GO:0016020;GO:0019867;GO:0030312;GO:0030313;GO:0031975;GO:0033554;GO:0044462;GO:0044464;GO:0044699;GO:0044763;GO:0050896;GO:0051716;GO:0071944	OuterMembrane
-14.1198	-13.5344	-13.3669	-13.0704	-9.9819	-9.93466	-9.77876	-9.79397	24	57.2	48.452	0	210.85	187	5.43912	0	3.65058	1.63951	AFT92306.1	group A colicin translocation tolB protein [Francisella tularensis subsp. holarctica FSC200]	FTS_0332	tolB	12.5584	Intracellular trafficking, secretion, and vesicular transport	U	COG0823	TolB	Periplasmic component of the Tol biopolymer transport system		tolB, TolB protein	K03641	Involved in the TonB-independent uptake of proteins (By similarity)	GO:0003674;GO:0005215;GO:0005575;GO:0005623;GO:0006810;GO:0008104;GO:0008150;GO:0015031;GO:0015833;GO:0017038;GO:0019534;GO:0030288;GO:0030312;GO:0030313;GO:0031975;GO:0033036;GO:0042597;GO:0042886;GO:0043213;GO:0044462;GO:0044464;GO:0044699;GO:0044765;GO:0045184;GO:0051179;GO:0051234;GO:0071702;GO:0071705;GO:0071944;GO:1901998	Periplasmic
-10.6118	-10.1392	-9.11126	-9.15647	-6.08197	-6.05809	-6.07576	-6.23748	29	82.1	23.291	0	323.31	753	4.17351	0	3.64135	1.53409	AFT92308.1	OmpA family peptidoglycan-associated lipoprotein [Francisella tularensis subsp. holarctica FSC200]	FTS_0334	pal	12.4783	Cell wall/membrane/envelope biogenesis	M	COG2885	OmpA	Outer membrane protein OmpA and related peptidoglycan-associated (lipo)proteins		pal, peptidoglycan-associated lipoprotein	K03640	Peptidoglycan-associated lipoprotein	GO:0005575;GO:0005623;GO:0005886;GO:0009279;GO:0016020;GO:0019867;GO:0030312;GO:0030313;GO:0031975;GO:0044462;GO:0044464;GO:0071944	OuterMembrane
-15.7921	-15.147	-15.8668	-14.9227	-11.8081	-11.7569	-11.8481	-12.0004	18	62.6	38.786	0	168.66	70	5.2401	0	3.57876	1.59752	AFT93126.1	hypothetical protein FTS_1430 [Francisella tularensis subsp. holarctica FSC200]	FTS_1430		11.9485											Unknown
-14.126	-14.2855	-13.2689	-13.7259	-10.2958	-10.1698	-10.2349	-10.4301	20	57.5	37.464	0	258.3	105	5.30197	0	3.56893	1.5977	AFT93254.1	VacJ like lipoprotein [Francisella tularensis subsp. holarctica FSC200]	FTS_1598		11.8673	Cell wall/membrane/envelope biogenesis	M	COG2853	VacJ	ABC-type transporter Mla maintaining outer membrane lipid asymmetry, lipoprotein component MlaA		mlaA, phospholipid-binding lipoprotein MlaA	K04754	(LipO)protein	GO:0005575;GO:0005623;GO:0009279;GO:0016020;GO:0019867;GO:0030312;GO:0030313;GO:0031975;GO:0044462;GO:0044464;GO:0071944	OuterMembrane
-11.5202	-10.9939	-10.8118	-10.4152	-7.43217	-7.35763	-7.48558	-7.32184	13	58	20.568	0	315.2	177	5.29461	0	3.53596	1.584	AFT93302.1	hypothetical protein FTS_1664 [Francisella tularensis subsp. holarctica FSC200]	FTS_1664		11.5993											Unknown
-13.2858	-12.8911	-12.7449	-12.5776	-9.23267	-9.2737	-9.44634	-9.46682	8	66.1	13.413	0	39.127	52	6.19944	0	3.51997	1.62774	AFT92092.1	outer membrane lipoprotein [Francisella tularensis subsp. holarctica FSC200]	FTS_0061	omlA	11.4714	Cell wall/membrane/envelope biogenesis	M	COG2913	BamE	Outer membrane protein assembly factor BamE, lipoprotein component of the BamABCDE complex		bamE, outer membrane protein assembly factor BamE	K06186	Outer membrane lipoprotein	GO:0005575;GO:0005623;GO:0009279;GO:0016020;GO:0019867;GO:0030312;GO:0030313;GO:0031975;GO:0044462;GO:0044464;GO:0071944	OuterMembrane
-16.4365	-16.1501	-17.0749	-16.8073	-13.1128	-13.4712	-13.1334	-13.0774	27	47.2	73.307	0	135.35	75	5.31206	0	3.41851	1.53775	AFT92956.1	hypothetical protein FTS_1187 [Francisella tularensis subsp. holarctica FSC200]	FTS_1187		10.6923	Amino acid transport and metabolism	E							Transglutaminase-like superfamily		Cytoplasmic
-9.68309	-9.32421	-9.6495	-9.65396	-6.16426	-6.09932	-6.18655	-6.20192	40	73.6	48.033	0	323.31	897	7.71498	0	3.41468	1.63555	AFT92841.1	D-alanyl-D-alanine carboxypeptidase [Francisella tularensis subsp. holarctica FSC200]	FTS_1034	dacD	10.664	Cell wall/membrane/envelope biogenesis	M	COG1686	DacC	D-alanyl-D-alanine carboxypeptidase	Metabolic pathways;Peptidoglycan biosynthesis	dacC, serine-type D-Ala-D-Ala carboxypeptidase (penicillin-binding protein 5/6) [EC:3.4.16.4]	K07258	D-alanyl-D-alanine carboxypeptidase	GO:0000270;GO:0003674;GO:0003824;GO:0004180;GO:0004185;GO:0005488;GO:0005575;GO:0005618;GO:0005623;GO:0005886;GO:0005887;GO:0006022;GO:0006023;GO:0006024;GO:0006807;GO:0008144;GO:0008150;GO:0008152;GO:0008233;GO:0008236;GO:0008238;GO:0008360;GO:0008658;GO:0009002;GO:0009058;GO:0009059;GO:0009252;GO:0009273;GO:0009274;GO:0009276;GO:0009987;GO:0016020;GO:0016021;GO:0016787;GO:0017171;GO:0022603;GO:…	Unknown
-8.05813	-8.04323	-6.63882	-6.9027	-4.0539	-4.15249	-3.79932	-3.99482	31	62.8	41.259	0	323.31	2225	3.96616	0	3.41059	1.43257	AFT93032.1	OmpA family protein [Francisella tularensis subsp. holarctica FSC200]	FTS_1295	fopA	10.6338	Cell wall/membrane/envelope biogenesis	M							Ompa motb domain protein		OuterMembrane
-13.2956	-13.092	-13.0526	-12.9669	-9.59015	-9.58907	-9.82349	-9.78837	22	65.8	34.693	0	293.49	134	7.53307	0	3.404	1.62571	AFT92818.1	Type IV pili, pilus assembly protein [Francisella tularensis subsp. holarctica FSC200]	FTS_1005	pilF	10.5854	Cell motility;Extracellular structures	N;W	COG3063	PilF	Tfp pilus assembly protein PilF		pilF, type IV pilus assembly protein PilF	K02656	type IV pilus biogenesis stability protein PilW		Unknown
-10.2812	-10.1628	-9.44762	-9.69454	-6.40273	-6.45965	-6.50213	-6.63959	37	84.7	46.754	0	323.31	729	5.54251	0	3.39551	1.54171	AFT92297.1	OmpA family protein [Francisella tularensis subsp. holarctica FSC200]	FTS_0323		10.5232	Cell wall/membrane/envelope biogenesis	M							Ompa motb domain protein		OuterMembrane
-9.51869	-9.28415	-8.75924	-8.82045	-5.82783	-5.76491	-5.75306	-5.78595	5	54.2	10.524	0	122.87	199	5.72261	0	3.31269	1.51674	AFT92865.1	hypothetical protein FTS_1068 [Francisella tularensis subsp. holarctica FSC200]	FTS_1068		9.9362											Unknown
-17.2911	-15.9248	-16.498	-15.4318	-12.6387	-12.6665	-13.1097	-13.528	3	18.4	22.15	0	38.053	14	3.47541	0	3.30071	1.34636	AFT92725.1	ATP-dependent Clp protease proteolytic subunit [Francisella tularensis subsp. holarctica FSC200]	FTS_0883	clpP	9.85401	Posttranslational modification, protein turnover, chaperones	O	COG0740	ClpP	ATP-dependent protease ClpP, protease subunit		clpP, ATP-dependent Clp protease, protease subunit [EC:3.4.21.92]	K01358	Cleaves peptides in various proteins in a process that requires ATP hydrolysis. Has a chymotrypsin-like activity. Plays a major role in the degradation of misfolded proteins (By similarity)	GO:0003674;GO:0003824;GO:0005575;GO:0005618;GO:0005622;GO:0005623;GO:0005737;GO:0005829;GO:0005886;GO:0006508;GO:0006515;GO:0006950;GO:0008150;GO:0008152;GO:0008233;GO:0008236;GO:0009056;GO:0009057;GO:0009266;GO:0009408;GO:0009628;GO:0009987;GO:0016020;GO:0016787;GO:0017171;GO:0019538;GO:0030163;GO:0030312;GO:0040007;GO:0043170;GO:0044237;GO:0044238;GO:0044248;GO:0044257;GO:0044260;GO:0044265;GO:…	Cytoplasmic
-14.6799	-14.4255	-14.1139	-14.1602	-11.1311	-10.8294	-11.2119	-11.0867	28	59.3	53.483	0	321.94	119	6.13988	0	3.28008	1.52211	AFT92802.1	hypothetical protein FTS_0983 [Francisella tularensis subsp. holarctica FSC200]	FTS_0983		9.71413	Function unknown	S							(LipO)protein		OuterMembrane
-14.1828	-15.4336	-14.1073	-14.0838	-11.2655	-11.1811	-11.2255	-11.1065	7	47.7	24.106	0	51.548	39	4.20721	0	3.25721	1.39813	AFT92151.1	outer membrane lipoprotein LolB [Francisella tularensis subsp. holarctica FSC200]	FTS_0143	lolB	9.56129	Cell wall/membrane/envelope biogenesis	M	COG3017	LolB	Outer membrane lipoprotein LolB, involved in outer membrane biogenesis		lolB, outer membrane lipoprotein LolB	K02494	Plays a critical role in the incorporation of lipoproteins in the outer membrane after they are released by the LolA protein (By similarity)	GO:0003674;GO:0004872;GO:0005575;GO:0005623;GO:0006810;GO:0006897;GO:0006898;GO:0008150;GO:0009279;GO:0016020;GO:0016192;GO:0019867;GO:0030228;GO:0030312;GO:0030313;GO:0031975;GO:0038024;GO:0044462;GO:0044464;GO:0051179;GO:0051234;GO:0071944	Unknown
-12.3973	-11.8248	-11.5683	-10.8132	-8.86597	-8.94712	-7.95224	-7.85708	10	57.1	21.033	0	294.58	115	3.50498	0	3.2453	1.33085	AFT92954.1	rare lipoprotein B family protein [Francisella tularensis subsp. holarctica FSC200]	FTS_1185		9.48269	Cell wall/membrane/envelope biogenesis	M	COG2980	LptE	Outer membrane lipoprotein LptE/RlpB (LPS assembly)		lptE, LPS-assembly lipoprotein	K03643			Unknown
-13.1197	-12.3894	-12.6582	-11.846	-9.51403	-9.41572	-9.1475	-9.23588	9	77.4	17.239	0	127.44	74	4.56151	0	3.17503	1.39332	AFT92360.1	hypothetical protein FTS_0415 [Francisella tularensis subsp. holarctica FSC200]	FTS_0415		9.03189											OuterMembrane
-13.9014	-13.7712	-13.5238	-13.2776	-10.3226	-10.2498	-10.5583	-10.6648	5	55.9	8.0151	0	14.285	32	5.82892	0	3.1696	1.46133	AFT93050.1	hypothetical protein FTS_1319 [Francisella tularensis subsp. holarctica FSC200]	FTS_1319		8.99795											Unknown
-12.4212	-12.4687	-12.3483	-12.0843	-9.04507	-9.12592	-9.23818	-9.41171	12	55.7	23.407	0	136.3	111	6.74311	0	3.12539	1.47641	AFT92832.1	hypothetical protein FTS_1023 [Francisella tularensis subsp. holarctica FSC200]	FTS_1023		8.72643	Function unknown	S							(Lipo)protein		Unknown
-9.88272	-8.92986	-8.78519	-7.6879	-6.15105	-6.16554	-5.20396	-5.27514	15	59.2	13.729	0	308.1	358	3.00834	0	3.12249	1.23806	AFT92118.1	hypothetical protein FTS_0093 [Francisella tularensis subsp. holarctica FSC200]	FTS_0093		8.70893	Function unknown	S							Protein of unknown function (DUF3568)		Unknown
-12.7713	-12.672	-12.8901	-12.6054	-9.53759	-9.50686	-9.75344	-9.7606	13	67.6	19.632	0	109.53	104	7.33576	0	3.09508	1.47943	AFT92326.1	methionine sulfoxide reductase B [Francisella tularensis subsp. holarctica FSC200]	FTS_0370	msrB	8.54501	Posttranslational modification, protein turnover, chaperones	O	COG0229	MsrB	Peptide methionine sulfoxide reductase MsrB		msrB, peptide-methionine (R)-S-oxide reductase [EC:1.8.4.12]	K07305	reductase	GO:0003674;GO:0003824;GO:0008113;GO:0008150;GO:0008152;GO:0009405;GO:0016491;GO:0016667;GO:0016671;GO:0044710;GO:0051704;GO:0055114	Cytoplasmic
-13.9316	-12.2751	-13.1773	-12.3095	-10.106	-9.94455	-9.71708	-9.78139	8	59.4	16.366	0	142.06	75	3.53501	0	3.03613	1.26236	AFT92986.1	hypothetical protein FTS_1229 [Francisella tularensis subsp. holarctica FSC200]	FTS_1229		8.20287											Unknown
-7.96394	-8.21899	-7.60612	-7.40463	-5.00166	-4.8263	-4.678	-4.72121	10	50.4	14.883	0	232.08	467	5.30825	0	2.99163	1.36262	AFT92532.1	hypothetical protein FTS_0642 [Francisella tularensis subsp. holarctica FSC200]	FTS_0642		7.9537											Unknown
-11.7043	-11.5195	-11.1523	-10.8401	-9.09839	-8.48564	-7.87163	-7.88972	7	46.5	15.64	0	133.18	45	3.83778	0	2.96771	1.26328	AFT92190.1	hypothetical protein FTS_0195 [Francisella tularensis subsp. holarctica FSC200]	FTS_0195		7.82292											Extracellular
-15.2236	-15.1415	-15.105	-14.9124	-12.0635	-12.0413	-12.3255	-12.5585	18	50.4	52.472	0	101.9	69	6.05951	0	2.84843	1.33177	AFT92871.1	hypothetical protein FTS_1076 [Francisella tularensis subsp. holarctica FSC200]	FTS_1076		7.20217	Cell wall/membrane/envelope biogenesis;Intracellular trafficking, secretion, and vesicular transport	M;U							Outer membrane efflux protein	GO:0003674;GO:0005215;GO:0005575;GO:0005623;GO:0006810;GO:0006811;GO:0006820;GO:0006873;GO:0006875;GO:0006879;GO:0008104;GO:0008150;GO:0009279;GO:0009306;GO:0009987;GO:0010033;GO:0014070;GO:0015031;GO:0015267;GO:0015288;GO:0015562;GO:0015688;GO:0015711;GO:0015850;GO:0015891;GO:0016020;GO:0019725;GO:0019867;GO:0022803;GO:0022829;GO:0022857;GO:0030003;GO:0030312;GO:0030313;GO:0031975;GO:0032940;GO:…	OuterMembrane
-18.0389	-17.1966	-17.792	-16.6442	-14.9494	-16.596	-13.6224	-13.5509	4	12.8	38.873	0	4.9672	9	1.89626	0.000763636	2.73824	0.984799	AFT93387.1	uroporphyrinogen decarboxylase [Francisella tularensis subsp. holarctica FSC200]	FTS_1769	hemE	6.67258	Coenzyme transport and metabolism	H	COG0407	HemE	Uroporphyrinogen-III decarboxylase	Biosynthesis of secondary metabolites;Metabolic pathways;Porphyrin and chlorophyll metabolism	hemE, uroporphyrinogen decarboxylase [EC:4.1.1.37]	K01599	Catalyzes the decarboxylation of four acetate groups of uroporphyrinogen-III to yield coproporphyrinogen-III (By similarity)	GO:0003674;GO:0003824;GO:0004853;GO:0005575;GO:0005622;GO:0005623;GO:0005737;GO:0006082;GO:0006520;GO:0006536;GO:0006725;GO:0006778;GO:0006779;GO:0006780;GO:0006782;GO:0006783;GO:0006807;GO:0008150;GO:0008152;GO:0009058;GO:0009064;GO:0009987;GO:0016053;GO:0016829;GO:0016830;GO:0016831;GO:0018130;GO:0019353;GO:0019438;GO:0019752;GO:0033013;GO:0033014;GO:0033526;GO:0034641;GO:0042168;GO:0042440;GO:…	Cytoplasmic
-18.335	-19.3915	-20.2355	-17.7896	-17.0574	-16.5544	-15.8509	-15.6872	4	13.3	33.216	0	8.0342	9	2.24354	0.000394366	2.65042	1.00716	AFT92767.1	beta-lactamase class A [Francisella tularensis subsp. holarctica FSC200]	FTS_0937	blaA	6.27848	Defense mechanisms	V	COG2367	PenP	Beta-lactamase class A	beta-Lactam resistance;Biosynthesis of antibiotics	penP, beta-lactamase class A [EC:3.5.2.6]	K17836	Beta-lactamase	GO:0005575;GO:0005623;GO:0005886;GO:0016020;GO:0044464;GO:0071944	Periplasmic
-13.2697	-13.3224	-13.2242	-13.7502	-10.6471	-10.4766	-10.8735	-11.1232	27	68	44.822	0	238.61	159	5.09732	0.00043299	2.61151	1.19498	AFT92940.1	membrane-bound lytic murein transglycosylase [Francisella tularensis subsp. holarctica FSC200]	FTS_1165	mltA	6.11142	Cell wall/membrane/envelope biogenesis	M	COG2821	MltA	Membrane-bound lytic murein transglycosylase		mltA, membrane-bound lytic murein transglycosylase A [EC:4.2.2.-]	K08304	Membrane-bound lytic Murein transglycosylase A	GO:0000270;GO:0000910;GO:0003674;GO:0003824;GO:0004553;GO:0005575;GO:0005623;GO:0005886;GO:0005887;GO:0006022;GO:0006023;GO:0006024;GO:0006026;GO:0006027;GO:0006807;GO:0007049;GO:0008150;GO:0008152;GO:0008933;GO:0009056;GO:0009057;GO:0009058;GO:0009059;GO:0009252;GO:0009253;GO:0009273;GO:0009279;GO:0009987;GO:0016020;GO:0016021;GO:0016740;GO:0016757;GO:0016787;GO:0016798;GO:0019867;GO:0022402;GO:…	Unknown
-12.012	-12.2276	-12.0699	-12.0521	-9.16458	-9.295	-9.68781	-9.78664	16	59.1	32.068	0	174.65	125	5.50823	0	2.60691	1.2083	AFT92581.1	competence lipoprotein ComL [Francisella tularensis subsp. holarctica FSC200]	FTS_0701	comL	6.092	Cell wall/membrane/envelope biogenesis	M	COG4105	BamD	Outer membrane protein assembly factor BamD, BamD/ComL family		bamD, outer membrane protein assembly factor BamD	K05807	Part of the outer membrane protein assembly complex, which is involved in assembly and insertion of beta-barrel proteins into the outer membrane	GO:0003674;GO:0005102;GO:0005186;GO:0005488;GO:0005515;GO:0005575;GO:0005623;GO:0007154;GO:0008104;GO:0008150;GO:0009279;GO:0009292;GO:0009294;GO:0009605;GO:0009987;GO:0009991;GO:0016020;GO:0016043;GO:0016044;GO:0019867;GO:0022607;GO:0030312;GO:0030313;GO:0030413;GO:0030420;GO:0031668;GO:0031975;GO:0033036;GO:0034613;GO:0043163;GO:0043165;GO:0044085;GO:0044091;GO:0044462;GO:0044464;GO:0044699;GO:…	OuterMembrane
-12.4345	-12.1071	-12.2984	-12.2292	-10.4398	-10.3481	-8.98545	-8.87957	49	79.5	67.459	0	323.31	369	3.04574	0.000405797	2.60406	1.07236	AFT92713.1	X-prolyl aminopeptidase 2 [Francisella tularensis subsp. holarctica FSC200]	FTS_0868		6.07993	Amino acid transport and metabolism	E	COG0006	PepP	Xaa-Pro aminopeptidase		pepP, Xaa-Pro aminopeptidase [EC:3.4.11.9]	K01262	aminopeptidase	GO:0006508;GO:0008150;GO:0008152;GO:0019538;GO:0043170;GO:0044238;GO:0071704	Cytoplasmic
-9.43931	-9.91756	-8.46758	-9.83946	-6.65668	-6.63193	-7.17569	-6.80477	26	72.5	39.945	0	323.31	583	3.47325	0.000411765	2.59871	1.10308	AFT93021.1	hypothetical protein FTS_1279 [Francisella tularensis subsp. holarctica FSC200]	FTS_1279		6.05745	Signal transduction mechanisms	T	COG0790	TPR	TPR repeat		uncharacterized protein	K07126	Sel1 domain protein repeat-containing protein		Unknown
-13.016	-14.0715	-12.8504	-14.2565	-10.9223	-10.63	-11.3685	-11.0758	8	32.5	28.643	0	79.284	39	3.20989	0.000403846	2.54946	1.06648	AFT93210.1	hypothetical protein FTS_1540 [Francisella tularensis subsp. holarctica FSC200]	FTS_1540		5.85415											Extracellular
-13.6843	-13.4967	-13.4216	-13.6828	-11.1525	-11.0648	-10.947	-10.9337	24	51.4	64.493	0	253.86	102	7.05698	0	2.54681	1.22186	AFT92652.1	Type IV pili secretin component [Francisella tularensis subsp. holarctica FSC200]	FTS_0792	pilQ	5.84342	Intracellular trafficking, secretion, and vesicular transport	U	COG1450	PulD	Type II secretory pathway component GspD/PulD (secretin)		pilQ, type IV pilus assembly protein PilQ	K02666	(Type IV) pilus	GO:0003674;GO:0003676;GO:0003677;GO:0005488;GO:0005575;GO:0005623;GO:0006810;GO:0008104;GO:0008150;GO:0009279;GO:0009297;GO:0009306;GO:0009987;GO:0015031;GO:0015628;GO:0015976;GO:0016020;GO:0016043;GO:0019867;GO:0022607;GO:0030030;GO:0030031;GO:0030312;GO:0030313;GO:0031975;GO:0032940;GO:0033036;GO:0043711;GO:0044085;GO:0044462;GO:0044464;GO:0044699;GO:0044763;GO:0044765;GO:0045184;GO:0046903;GO:…	OuterMembrane
-14.114	-13.4793	-14.2837	-13.8039	-11.4147	-11.3448	-11.3805	-11.4699	10	35.1	29.403	0	80.89	47	5.08839	0.000424242	2.51772	1.15525	AFT92161.1	hypothetical protein FTS_0163 [Francisella tularensis subsp. holarctica FSC200]	FTS_0163		5.72678	Cell cycle control, cell division, chromosome partitioning;Cytoskeleton	D;Z							Inherit from bactNOG: regulator of chromosome condensation, RCC1		Unknown
-13.1993	-12.9437	-13.2988	-13.3047	-10.0702	-10.0233	-11.3806	-11.4426	27	42.5	98.609	0	237.54	196	3.05112	0.000398104	2.45745	1.02255	AFT93224.1	organic solvent tolerance protein, OstA [Francisella tularensis subsp. holarctica FSC200]	FTS_1557	ostA1	5.49246	Cell wall/membrane/envelope biogenesis	M	COG1452	LptD	LPS assembly outer membrane protein LptD (organic solvent tolerance protein OstA)		lptD, LPS-assembly protein	K04744	involved in the assembly of LPS in the outer leaflet of the outer membrane. Determines N-hexane tolerance and is involved in outer membrane permeability. Essential for envelope biogenesis (By similarity)	GO:0005575;GO:0005623;GO:0006810;GO:0006869;GO:0008150;GO:0009279;GO:0009636;GO:0009987;GO:0010033;GO:0010876;GO:0015920;GO:0016020;GO:0016043;GO:0016044;GO:0019867;GO:0022607;GO:0030312;GO:0030313;GO:0031975;GO:0033036;GO:0042221;GO:0043163;GO:0043165;GO:0044085;GO:0044091;GO:0044462;GO:0044464;GO:0044699;GO:0044763;GO:0044765;GO:0045229;GO:0050896;GO:0051179;GO:0051234;GO:0061024;GO:0071702;GO:…	OuterMembrane
-11.4443	-12.1399	-11.5491	-11.7104	-8.71755	-8.82799	-10.5953	-9.57629	4	23.9	26.357	0	8.4653	19	2.59682	0.00145455	2.28165	0.927796	AFT92896.1	3-oxoacyl-(acyl-carrier-protein) reductase [Francisella tularensis subsp. holarctica FSC200]	FTS_1110	fabG	4.86232	Lipid transport and metabolism;Secondary metabolites biosynthesis, transport and catabolism;General function prediction only	I;Q;R	COG1028	FabG	NAD(P)-dependent dehydrogenase, short-chain alcohol dehydrogenase family	Biosynthesis of antibiotics;Biosynthesis of unsaturated fatty acids;Biotin metabolism;Fatty acid metabolism;Galactose metabolism;Metabolic pathways	fabG, 3-oxoacyl-[acyl-carrier protein] reductase [EC:1.1.1.100]	K00059	reductase	GO:0000166;GO:0003674;GO:0003824;GO:0004312;GO:0004316;GO:0005488;GO:0005575;GO:0005623;GO:0005886;GO:0006082;GO:0006461;GO:0006629;GO:0006631;GO:0006633;GO:0006766;GO:0006767;GO:0006768;GO:0006790;GO:0006807;GO:0008150;GO:0008152;GO:0008610;GO:0009058;GO:0009059;GO:0009102;GO:0009110;GO:0009273;GO:0009987;GO:0016020;GO:0016043;GO:0016053;GO:0016491;GO:0016614;GO:0016616;GO:0016740;GO:0016746;GO:…	Cytoplasmic
-7.74355	-7.44893	-6.45396	-6.56267	-4.0896	-4.31462	-5.04934	-5.66628	18	72.5	15.772	0	323.31	818	2.48593	0.00177966	2.27232	0.915637	AFT92358.1	lipoprotein of unknown function [Francisella tularensis subsp. holarctica FSC200]	FTS_0412	lpnA	4.83098											OuterMembrane
-18.5766	-18.3819	-18.5569	-17.9546	-15.7154	-15.3788	-17.5468	-15.8014	5	12.9	46.274	0	7.2137	5	2.35905	0.00175732	2.25691	0.899781	AFT92604.1	2-octaprenyl-3-methyl-6-methoxy-1,4-benzoquinol hydroxylase [Francisella tularensis subsp. holarctica FSC200]	FTS_0727	ubiF	4.77966	Coenzyme transport and metabolism;Energy production and conversion	C;H	COG0654	UbiH	2-polyprenyl-6-methoxyphenol hydroxylase and related FAD-dependent oxidoreductases	Biosynthesis of secondary metabolites;Metabolic pathways;Ubiquinone and other terpenoid-quinone biosynthesis	ubiI, 2-octaprenylphenol hydroxylase [EC:1.14.13.-]	K18800	hydroxylase	GO:0003674;GO:0003824;GO:0004497;GO:0006732;GO:0006733;GO:0006743;GO:0006744;GO:0008150;GO:0008152;GO:0008682;GO:0009058;GO:0009108;GO:0009987;GO:0016491;GO:0016705;GO:0016709;GO:0042180;GO:0042181;GO:0042375;GO:0044237;GO:0044249;GO:0044281;GO:0044283;GO:0044710;GO:0044711;GO:0045426;GO:0051186;GO:0051188;GO:0055114;GO:0071704;GO:1901576;GO:1901661;GO:1901663	Cytoplasmic
-14.3462	-14.4899	-13.8149	-14.7654	-12.1023	-12.2525	-12.1859	-12.0508	34	59.1	87.663	0	161.44	107	4.42456	0.000390698	2.20622	1.00073	AFT92452.1	outer membrane protein of unknown function [Francisella tularensis subsp. holarctica FSC200]	FTS_0537		4.61464	Cell wall/membrane/envelope biogenesis	M	COG4775	BamA	Outer membrane protein assembly factor BamA		SAM50, outer membrane protein insertion porin family	K07277	Part of the outer membrane protein assembly complex, which is involved in assembly and insertion of beta-barrel proteins into the outer membrane	GO:0005575;GO:0005622;GO:0005623;GO:0005737;GO:0008104;GO:0008150;GO:0009279;GO:0009987;GO:0016020;GO:0016043;GO:0016044;GO:0019867;GO:0022607;GO:0030312;GO:0030313;GO:0031975;GO:0033036;GO:0034613;GO:0043163;GO:0043165;GO:0044085;GO:0044091;GO:0044424;GO:0044462;GO:0044464;GO:0044699;GO:0044763;GO:0045229;GO:0051179;GO:0051205;GO:0051641;GO:0051668;GO:0061024;GO:0070727;GO:0071709;GO:0071840;GO:…	OuterMembrane
-11.5717	-14.5731	-11.5818	-10.7675	-10.1957	-10.1388	-9.57402	-9.95695	8	66.4	16.013	0	46.194	50	1.35418	0.00276336	2.15715	0.756851	AFT92565.1	hypothetical protein FTS_0685 [Francisella tularensis subsp. holarctica FSC200]	FTS_0685		4.46033											Unknown
-10.8086	-10.4385	-10.8424	-10.9904	-8.43948	-8.42767	-8.75945	-8.86754	15	60.1	16.134	0	151.33	133	4.94015	0.000770642	2.14646	0.992749	AFT92827.1	hypothetical protein FTS_1018 [Francisella tularensis subsp. holarctica FSC200]	FTS_1018		4.42739											Unknown
-18.4403	-16.363	-16.1373	-16.1984	-15.6528	-14.6486	-14.133	-14.2959	2	9.5	21.729	0	4.6455	2	1.7482	0.00248062	2.10221	0.79318	AFT93054.1	hypothetical protein FTS_1324 [Francisella tularensis subsp. holarctica FSC200]	FTS_1324		4.29366											CytoplasmicMembrane
-8.8243	-9.17825	-8.10695	-8.52161	-6.86334	-6.83097	-6.40493	-6.40001	24	74.3	39.527	0	323.31	701	3.62521	0.00175	2.03297	0.899056	AFT92864.1	protein-disulfide isomerase [Francisella tularensis subsp. holarctica FSC200]	FTS_1067		4.09245	Posttranslational modification, protein turnover, chaperones	O							DSBA-like thioredoxin domain	GO:0005575;GO:0005623;GO:0009279;GO:0016020;GO:0019867;GO:0030312;GO:0030313;GO:0031975;GO:0044462;GO:0044464;GO:0071944	Unknown
-14.2335	-13.8311	-14.1878	-14.0019	-11.8598	-11.7647	-12.2239	-12.3257	5	38	22.051	0	39.806	33	4.74615	0.00146725	2.02006	0.93315	AFT92268.1	hypothetical protein FTS_0283 [Francisella tularensis subsp. holarctica FSC200]	FTS_0283		4.05601											Unknown
-14.3483	-13.8208	-14.4958	-14.1356	-11.8446	-11.7687	-12.5449	-12.6548	23	61	46.478	0	254.02	106	3.47547	0.00205714	1.99689	0.878451	AFT93205.1	phospholipase D family protein [Francisella tularensis subsp. holarctica FSC200]	FTS_1531		3.99139									phospholipase d		Unknown
-13.4488	-12.5929	-13.6988	-13.7382	-11.1781	-11.2781	-11.5997	-11.5378	31	70.5	52.2	0	274.27	153	3.34249	0.00236145	1.97122	0.862565	AFT92478.1	hypothetical protein FTS_0573 [Francisella tularensis subsp. holarctica FSC200]	FTS_0573		3.92099	Function unknown	S	COG3014	COG3014	Uncharacterized protein		uncharacterized protein	K09859	Tetratricopeptide TPR_2 repeat protein		OuterMembrane
-10.6313	-10.6969	-10.7853	-10.6407	-8.70533	-8.60707	-8.71154	-8.87739	9	57.1	22.184	0	51.997	113	7.00828	0.000743363	1.9632	0.950117	AFT92912.1;AFT92124.1	hypothetical protein FTS_1129 [Francisella tularensis subsp. holarctica FSC200];hypothetical protein FTS_0101 [Francisella tularensis subsp. holarctica FSC200]	FTS_1129;FTS_0101		3.89926											Unknown
-11.4317	-10.6602	-10.9121	-10.2162	-8.97654	-8.9182	-8.8465	-8.90554	14	64	14.468	0	136.29	138	3.51274	0.00233333	1.89335	0.839624	AFT92921.1;AFT92133.1	hypothetical protein FTS_1139 [Francisella tularensis subsp. holarctica FSC200];hypothetical protein FTS_0111 [Francisella tularensis subsp. holarctica FSC200]	FTS_1139;FTS_0111		3.71498											Unknown
-12.3786	-12.2469	-12.4284	-12.4035	-10.2696	-10.2323	-10.683	-10.7433	32	75	57.243	0	323.31	227	4.97613	0.00206557	1.8823	0.879507	AFT93426.1	outer membrane protein tolC precursor [Francisella tularensis subsp. holarctica FSC200]	FTS_1817	tolC	3.68662	Cell wall/membrane/envelope biogenesis	M	COG1538	TolC	Outer membrane protein TolC	Bacterial secretion system;beta-Lactam resistance;Cationic antimicrobial peptide (CAMP) resistance;Two-component system	tolC, outer membrane protein	K12340	Outer membrane protein tolc	GO:0003674;GO:0005215;GO:0005575;GO:0005623;GO:0006810;GO:0006811;GO:0006820;GO:0006873;GO:0006875;GO:0006879;GO:0008104;GO:0008150;GO:0009279;GO:0009306;GO:0009987;GO:0010033;GO:0014070;GO:0015031;GO:0015267;GO:0015288;GO:0015562;GO:0015688;GO:0015711;GO:0015850;GO:0015891;GO:0016020;GO:0019725;GO:0019867;GO:0022803;GO:0022829;GO:0022857;GO:0030003;GO:0030312;GO:0030313;GO:0031975;GO:0032940;GO:…	OuterMembrane
-13.7016	-13.5128	-12.8348	-12.4367	-11.9289	-11.8727	-10.5835	-10.572	15	43.8	36.896	0	192.73	82	2.09855	0.00277395	1.88223	0.758221	AFT92949.1	hypothetical protein FTS_1178 [Francisella tularensis subsp. holarctica FSC200]	FTS_1178		3.68645	Function unknown	S							Lipoprotein		Unknown
-13.609	-13.5542	-13.4592	-13.9122	-11.4337	-11.4084	-11.9785	-12.2246	12	59.9	20.873	0	87.689	54	3.78457	0.00234263	1.87237	0.841436	AFT92080.1	chorismate mutase [Francisella tularensis subsp. holarctica FSC200]	FTS_0041		3.66133											Cytoplasmic
-11.0462	-10.6408	-11.0834	-10.5505	-8.94031	-8.86898	-9.22541	-9.22752	31	73.2	51.339	0	323.31	301	4.38779	0.00251969	1.76468	0.814686	AFT92833.1	serine-type D-Ala-D-Ala carboxypeptidase [Francisella tularensis subsp. holarctica FSC200]	FTS_1024	dacB	3.39798	Cell wall/membrane/envelope biogenesis	M	COG2027	DacB	D-alanyl-D-alanine carboxypeptidase	Peptidoglycan biosynthesis	dacB, serine-type D-Ala-D-Ala carboxypeptidase/endopeptidase (penicillin-binding protein 4) [EC:3.4.16.4 3.4.21.-]	K07259	D-alanyl-D-alanine carboxypeptidase	GO:0000003;GO:0000270;GO:0000910;GO:0003674;GO:0003824;GO:0004175;GO:0004180;GO:0004185;GO:0005488;GO:0005575;GO:0005623;GO:0006022;GO:0006023;GO:0006024;GO:0006026;GO:0006027;GO:0006807;GO:0007049;GO:0008144;GO:0008150;GO:0008152;GO:0008233;GO:0008236;GO:0008238;GO:0008360;GO:0008658;GO:0009002;GO:0009056;GO:0009057;GO:0009058;GO:0009059;GO:0009252;GO:0009253;GO:0009254;GO:0009273;GO:0009987;GO:…	Periplasmic
-6.66928	-6.48691	-6.65901	-6.65935	-4.47369	-4.61135	-5.29795	-5.23591	27	75.8	19.785	0	323.31	1126	3.67287	0.00247104	1.71391	0.773459	AFT92473.1	hypothetical protein FTS_0568 [Francisella tularensis subsp. holarctica FSC200]	FTS_0568		3.28049											Unknown
-16.1318	-16.2054	-15.902	-17.3778	-14.8026	-14.8283	-14.7961	-14.7183	3	17.3	25.575	0	14.817	11	2.55691	0.0041476	1.61791	0.693869	AFT92196.1	TPR repeat-containing protein [Francisella tularensis subsp. holarctica FSC200]	FTS_0201		3.0693	General function prediction only	R	COG2304	YfbK	Secreted protein containing bacterial Ig-like domain and vWFA domain		yfbK, Ca-activated chloride channel homolog	K07114	TPR domain protein		Unknown
-14.6012	-14.0852	-14.7715	-14.138	-12.9476	-12.6304	-12.7146	-12.863	19	51.8	50.98	0	107.63	80	3.90508	0.00273208	1.61008	0.737119	AFT93439.1	hypothetical protein FTS_1845 [Francisella tularensis subsp. holarctica FSC200]	FTS_1845		3.05269	Function unknown	S							Kelch domain protein		Unknown
-16.6916	-16.0755	-16.6327	-15.7146	-15.1519	-14.9333	-14.4104	-14.3356	6	21.9	40.683	0	27.376	19	2.66102	0.00460294	1.5708	0.680908	AFT92500.1	sugar transamine/perosamine synthetase [Francisella tularensis subsp. holarctica FSC200]	FTS_0600	wbtI	2.9707	Cell wall/membrane/envelope biogenesis	M							DegT DnrJ EryC1 StrS	GO:0000271;GO:0003674;GO:0003824;GO:0005975;GO:0005976;GO:0008150;GO:0008152;GO:0009058;GO:0009059;GO:0016051;GO:0043170;GO:0044238;GO:0044723;GO:0071704;GO:1901576	Cytoplasmic
-15.3972	-17.1275	-16.5191	-15.608	-14.3428	-14.6675	-14.7688	-14.7212	9	40.1	34.076	0	42.13	26	2.00086	0.00653381	1.53789	0.636905	AFT92792.1	malate dehydrogenase [Francisella tularensis subsp. holarctica FSC200]	FTS_0967	mdh	2.90369	Energy production and conversion	C	COG0039	Mdh	Malate/lactate dehydrogenase	Biosynthesis of antibiotics;Biosynthesis of secondary metabolites;Carbon metabolism;Citrate cycle (TCA cycle);Cysteine and methionine metabolism;Glyoxylate and dicarboxylate metabolism;Metabolic pathways;Methane metabolism;Microbial metabolism in diverse environments;Pyruvate metabolism	mdh, malate dehydrogenase [EC:1.1.1.37]	K00024	Catalyzes the reversible oxidation of malate to oxaloacetate (By similarity)	GO:0003674;GO:0003824;GO:0006091;GO:0006099;GO:0008150;GO:0008152;GO:0009060;GO:0009987;GO:0015980;GO:0016491;GO:0016614;GO:0016615;GO:0016616;GO:0030060;GO:0044237;GO:0044238;GO:0044710;GO:0045333;GO:0055114	Cytoplasmic
-6.07392	-6.08351	-6.17019	-6.47583	-4.60421	-4.53233	-4.95744	-4.5868	9	34.1	15.227	0	153.69	783	4.54684	0.00350562	1.53067	0.716885	AFT92078.1	hypothetical protein FTS_0037 [Francisella tularensis subsp. holarctica FSC200]	FTS_0037		2.8892											Unknown
-16.0648	-15.7268	-15.6096	-15.3404	-13.7398	-13.5432	-14.8329	-14.6415	10	38.7	35.413	0	76.864	30	2.2545	0.00651064	1.49602	0.635369	AFT92903.1	glyceraldehyde-3-phosphate dehydrogenase/erythrose-4-phosphate dehydrogenase [Francisella tularensis subsp. holarctica FSC200]	FTS_1117	gapA	2.82063	Carbohydrate transport and metabolism	G	COG0057	GapA	Glyceraldehyde-3-phosphate dehydrogenase/erythrose-4-phosphate dehydrogenase	Biosynthesis of amino acids;Biosynthesis of antibiotics;Biosynthesis of secondary metabolites;Carbon metabolism;Glycolysis / Gluconeogenesis;Metabolic pathways;Microbial metabolism in diverse environments	GAPDH, glyceraldehyde 3-phosphate dehydrogenase [EC:1.2.1.12]	K00134	Catalyzes the NAD-dependent conversion of D-erythrose 4- phosphate to 4-phosphoerythronate (By similarity)	GO:0005575;GO:0005622;GO:0005623;GO:0005737;GO:0044424;GO:0044464	Cytoplasmic
-18.4168	-16.2453	-19.6071	-15.7686	-17.9255	-16.2784	-14.8982	-14.9812	8	26.7	39.061	0	32.323	17	0.613848	0.0163049	1.48866	0.472498	AFT92665.1	ferrochelatase [Francisella tularensis subsp. holarctica FSC200]	FTS_0813	hemH	2.80628	Coenzyme transport and metabolism	H	COG0276	HemH	Protoheme ferro-lyase (ferrochelatase)	Biosynthesis of secondary metabolites;Metabolic pathways;Porphyrin and chlorophyll metabolism	hemH, protoporphyrin/coproporphyrin ferrochelatase [EC:4.99.1.1 4.99.1.9]	K01772	Catalyzes the ferrous insertion into protoporphyrin IX (By similarity)	GO:0003674;GO:0003824;GO:0004325;GO:0005575;GO:0005622;GO:0005623;GO:0005737;GO:0006725;GO:0006778;GO:0006779;GO:0006783;GO:0006807;GO:0008150;GO:0008152;GO:0009058;GO:0009314;GO:0009416;GO:0009628;GO:0009987;GO:0016829;GO:0018130;GO:0019438;GO:0033013;GO:0033014;GO:0034641;GO:0042168;GO:0042440;GO:0044237;GO:0044249;GO:0044271;GO:0044424;GO:0044464;GO:0044710;GO:0046148;GO:0046483;GO:0046501;GO:…	Cytoplasmic
-14.7365	-15.4164	-15.1156	-14.0169	-13.1438	-13.7372	-13.1418	-13.4706	6	57.8	18.395	0	29.586	24	2.30647	0.00651903	1.44802	0.620259	AFT92918.1;AFT92130.1	hypothetical protein FTS_1135 [Francisella tularensis subsp. holarctica FSC200];hypothetical protein FTS_0107 [Francisella tularensis subsp. holarctica FSC200]	FTS_1135;FTS_0107		2.72834											Unknown
-15.7854	-16.8322	-15.5409	-18.3707	-15.6292	-14.9545	-14.9668	-15.2037	4	25.2	23.339	0	22.093	15	1.14164	0.0104474	1.44377	0.542237	AFT92839.1	lipoate-protein ligase B [Francisella tularensis subsp. holarctica FSC200]	FTS_1032	lipB	2.7203	Coenzyme transport and metabolism	H	COG0321	LipB	Lipoate-protein ligase B	Lipoic acid metabolism;Metabolic pathways	lipB, lipoyl(octanoyl) transferase [EC:2.3.1.181]	K03801	Catalyzes the transfer of endogenously produced octanoic acid from octanoyl-acyl-carrier-protein onto the lipoyl domains of lipoate-dependent enzymes. Lipoyl-ACP can also act as a substrate although octanoyl-ACP is likely to be the physiological substrate (By similarity)	GO:0003674;GO:0003824;GO:0005575;GO:0005622;GO:0005623;GO:0005737;GO:0005886;GO:0006082;GO:0006464;GO:0006629;GO:0006631;GO:0006633;GO:0006732;GO:0006790;GO:0008150;GO:0008152;GO:0008610;GO:0009058;GO:0009106;GO:0009107;GO:0009108;GO:0009892;GO:0009987;GO:0010468;GO:0010605;GO:0010629;GO:0016020;GO:0016053;GO:0016740;GO:0016746;GO:0016747;GO:0017118;GO:0018130;GO:0019222;GO:0019538;GO:0019752;GO:…	Cytoplasmic
-16.4479	-16.348	-16.3239	-16.5769	-15.5444	-15.308	-14.6312	-14.5373	4	7	76.478	0	11.559	19	2.84464	0.00644211	1.41897	0.629222	AFT93459.1	competence protein [Francisella tularensis subsp. holarctica FSC200]	FTS_1866		2.67394	General function prediction only	R	COG0658;COG2333	ComEC	Predicted membrane metal-binding protein, Metal-dependent hydrolase, beta-lactamase superfamily II		comEC, competence protein ComEC	K02238	Competence protein		CytoplasmicMembrane
-15.1491	-15.3775	-15.2857	-15.2785	-13.5149	-13.7919	-13.7475	-14.4104	5	46.5	21.034	0	21.076	14	3.42002	0.00615714	1.40653	0.640209	AFT92091.1	phosphoheptose isomerase [Francisella tularensis subsp. holarctica FSC200]	FTS_0060	gmhA	2.65099	Carbohydrate transport and metabolism	G	COG0279	GmhA	Phosphoheptose isomerase	Lipopolysaccharide biosynthesis;Metabolic pathways	gmhA, D-sedoheptulose 7-phosphate isomerase [EC:5.3.1.28]	K03271	Catalyzes the isomerization of sedoheptulose 7-phosphate in D-glycero-D-manno-heptose 7-phosphate (By similarity)	GO:0000271;GO:0003674;GO:0003824;GO:0005575;GO:0005622;GO:0005623;GO:0005737;GO:0005975;GO:0005976;GO:0006275;GO:0006629;GO:0008150;GO:0008152;GO:0008610;GO:0008653;GO:0008968;GO:0009058;GO:0009059;GO:0009103;GO:0009244;GO:0009311;GO:0009312;GO:0009889;GO:0009987;GO:0010556;GO:0016051;GO:0016853;GO:0016866;GO:0016868;GO:0019219;GO:0019222;GO:0030174;GO:0031323;GO:0031326;GO:0033692;GO:0034637;GO:…	Cytoplasmic
-11.7415	-11.249	-11.7603	-11.3386	-10.0016	-10.0413	-10.2143	-10.2078	55	75.8	76.93	0	323.31	418	4.17326	0.00612364	1.40615	0.655762	AFT92398.1	soluble lytic murein transglycosylase [Francisella tularensis subsp. holarctica FSC200]	FTS_0467	slt	2.65028	Cell wall/membrane/envelope biogenesis	M	COG0741	MltE	Soluble lytic murein transglycosylase and related regulatory proteins (some contain LysM/invasin domains)		slt, soluble lytic murein transglycosylase [EC:4.2.2.-]	K08309	Lytic Murein transglycosylase	GO:0000270;GO:0003674;GO:0003824;GO:0005575;GO:0005623;GO:0006022;GO:0006026;GO:0006027;GO:0006807;GO:0008150;GO:0008152;GO:0008933;GO:0009056;GO:0009057;GO:0009253;GO:0016740;GO:0016757;GO:0030203;GO:0030288;GO:0030312;GO:0030313;GO:0031975;GO:0042597;GO:0043170;GO:0044462;GO:0044464;GO:0071704;GO:0071944;GO:1901135;GO:1901136;GO:1901564;GO:1901565;GO:1901575	Periplasmic
-15.1919	-14.6462	-15.4621	-14.7854	-13.3891	-13.4363	-13.7736	-13.8757	14	30.4	66.559	0	61.143	50	3.12579	0.00648763	1.40274	0.631063	AFT92582.1	FAD binding family protein [Francisella tularensis subsp. holarctica FSC200]	FTS_0702	mreA	2.64403	Energy production and conversion	C							FAD binding family protein		Periplasmic
-9.98075	-10.2944	-9.8032	-10.116	-8.75658	-8.65889	-8.59691	-8.71114	22	66.3	27.938	0	323.31	233	4.79256	0.00620144	1.36771	0.648349	AFT92178.1	polar amino acid uptake transporter [Francisella tularensis subsp. holarctica FSC200]	FTS_0183		2.58061	Amino acid transport and metabolism	E	COG0077	PheA2	Prephenate dehydratase	Biosynthesis of amino acids;Biosynthesis of antibiotics;Biosynthesis of secondary metabolites;Metabolic pathways;Phenylalanine, tyrosine and tryptophan biosynthesis	pheC, cyclohexadienyl dehydratase [EC:4.2.1.51 4.2.1.91]	K01713	Dehydratase	GO:0005575;GO:0005623;GO:0042597;GO:0044464	Periplasmic
-16.6379	-19.7138	-16.8229	-18.5436	-16.1721	-16.1328	-17.0972	-16.8473	4	21.1	32.769	0	6.7298	6	0.895929	0.0152853	1.36721	0.493165	AFT92079.1	LysR family transcriptional regulator [Francisella tularensis subsp. holarctica FSC200]	FTS_0038	lysR	2.57971	Transcription	K							LysR family transcriptional regulator		Cytoplasmic
-14.8849	-14.3194	-14.3222	-14.2245	-12.867	-12.9355	-13.3468	-13.238	2	9.6	28.143	0.0038071	2.0488	4	3.39015	0.00718089	1.34093	0.612245	AFT92861.1	rRNA methyltransferase [Francisella tularensis subsp. holarctica FSC200]	FTS_1062	spoU	2.53315	Translation, ribosomal structure and biogenesis	J	COG0566	SpoU	tRNA G18 (ribose-2'-O)-methylase SpoU		spoU, RNA methyltransferase, TrmH family	K03437	RNA methyltransferase TrmH family		Cytoplasmic
-9.06692	-8.85835	-9.01442	-8.91474	-7.42152	-7.47198	-7.7892	-7.91508	33	76.6	38.831	0	323.31	716	4.27963	0.00665292	1.31416	0.617214	AFT93162.1	glycerophosphoryl diester phosphodiesterase [Francisella tularensis subsp. holarctica FSC200]	FTS_1476	ugpQ	2.48658	Lipid transport and metabolism	I	COG0584	UgpQ	Glycerophosphoryl diester phosphodiesterase	Glycerophospholipid metabolism	E3.1.4.46, glycerophosphoryl diester phosphodiesterase [EC:3.1.4.46]	K01126	glycerophosphoryl diester phosphodiesterase	GO:0003674;GO:0003824;GO:0005575;GO:0005623;GO:0006629;GO:0006644;GO:0006793;GO:0006796;GO:0008081;GO:0008150;GO:0008152;GO:0008889;GO:0009056;GO:0009279;GO:0009395;GO:0009987;GO:0016020;GO:0016042;GO:0016787;GO:0016788;GO:0019637;GO:0019867;GO:0030312;GO:0030313;GO:0031975;GO:0042578;GO:0042597;GO:0044237;GO:0044238;GO:0044242;GO:0044248;GO:0044255;GO:0044462;GO:0044464;GO:0044710;GO:0046434;GO:…	Unknown
-18.6419	-19.1007	-17.2747	-18.605	-17.3845	-15.7592	-17.5874	-17.6564	2	14	19.961	0	5.4747	1	1.14855	0.0135619	1.30869	0.503835	AFT93189.1	glutamine amidotransferase subunit PdxT [Francisella tularensis subsp. holarctica FSC200]	FTS_1509		2.47717	Coenzyme transport and metabolism	H	COG0311	PdxT	Glutamine amidotransferase PdxT (pyridoxal biosynthesis)	Vitamin B6 metabolism	pdxT, 5'-phosphate synthase pdxT subunit [EC:4.3.3.6]	K08681	Involved in the hydrolysis of glutamine to glutamate and ammonia. Channels an ammonia molecule to PdxS (By similarity)	GO:0003674;GO:0003824;GO:0006732;GO:0006793;GO:0006796;GO:0008150;GO:0008152;GO:0009058;GO:0009108;GO:0009987;GO:0016829;GO:0016840;GO:0016843;GO:0019637;GO:0040007;GO:0042822;GO:0042823;GO:0044237;GO:0044249;GO:0051186;GO:0051188;GO:0071704;GO:0090407;GO:1901576	Unknown
-15.8618	-15.7417	-16.8445	-15.3917	-14.6341	-14.7	-14.536	-14.8138	6	17.3	52.854	0	29.781	16	2.18214	0.0103709	1.28894	0.556375	AFT92374.1	membrane protein of unknown function [Francisella tularensis subsp. holarctica FSC200]	FTS_0430		2.44349											Unknown
-11.4948	-11.911	-11.3758	-11.5271	-10.2614	-10.2032	-10.4802	-10.2353	9	72.9	11.144	0	138.35	92	4.16737	0.00820339	1.28212	0.601403	AFT93070.1	hypothetical protein FTS_1352 [Francisella tularensis subsp. holarctica FSC200]	FTS_1352		2.43196											Unknown
-12.6164	-12.7648	-12.0249	-11.9448	-11.2507	-11.2519	-10.9027	-10.9756	36	79.3	50.31	0	323.31	201	2.81984	0.0104053	1.24254	0.558222	AFT92975.1	signal recognition particle GTPase [Francisella tularensis subsp. holarctica FSC200]	FTS_1213	ffh	2.36615	Intracellular trafficking, secretion, and vesicular transport	U	COG0541	Ffh	Signal recognition particle GTPase	Bacterial secretion system;Protein export;Quorum sensing	SRP54, signal recognition particle subunit SRP54 [EC:3.6.5.4]	K03106	Involved in targeting and insertion of nascent membrane proteins into the cytoplasmic membrane. Binds to the hydrophobic signal sequence of the ribosome-nascent chain (RNC) as it emerges from the ribosomes. The SRP-RNC complex is then targeted to the cytoplasmic membrane where it interacts with the SRP receptor FtsY. Interaction with FtsY leads to the transfer of the RNC complex to the Sec transl…	GO:0000166;GO:0001882;GO:0001883;GO:0003674;GO:0003824;GO:0003924;GO:0005488;GO:0005525;GO:0005575;GO:0005618;GO:0005622;GO:0005623;GO:0005737;GO:0005886;GO:0006139;GO:0006152;GO:0006163;GO:0006184;GO:0006195;GO:0006605;GO:0006612;GO:0006725;GO:0006753;GO:0006793;GO:0006796;GO:0006807;GO:0006810;GO:0006886;GO:0008104;GO:0008150;GO:0008152;GO:0009056;GO:0009116;GO:0009117;GO:0009119;GO:0009141;GO:…	CytoplasmicMembrane
-15.8441	-15.8243	-15.5171	-16.6098	-14.8924	-14.9113	-14.6182	-14.5143	6	19.3	47.064	0	7.7978	14	2.52355	0.0110033	1.21475	0.539173	AFT93004.1	glutamate-1-semialdehyde aminotransferase [Francisella tularensis subsp. holarctica FSC200]	FTS_1255	hemL	2.321	Coenzyme transport and metabolism	H	COG0001	HemL	Glutamate-1-semialdehyde aminotransferase	Biosynthesis of secondary metabolites;Metabolic pathways;Microbial metabolism in diverse environments;Porphyrin and chlorophyll metabolism	hemL, glutamate-1-semialdehyde 2,1-aminomutase [EC:5.4.3.8]	K01845	Glutamate-1-semialdehyde aminotransferase	GO:0003674;GO:0003824;GO:0005575;GO:0005622;GO:0005623;GO:0005737;GO:0005886;GO:0006725;GO:0006778;GO:0006779;GO:0006807;GO:0008150;GO:0008152;GO:0009058;GO:0009987;GO:0016020;GO:0016853;GO:0016866;GO:0016869;GO:0018130;GO:0019438;GO:0033013;GO:0033014;GO:0034641;GO:0040007;GO:0044237;GO:0044249;GO:0044271;GO:0044424;GO:0044464;GO:0046483;GO:0051186;GO:0051188;GO:0071704;GO:0071944;GO:1901360;GO:…	Cytoplasmic
-17.0814	-17.2565	-16.3561	-16.1491	-15.8474	-15.7894	-15.1301	-15.406	5	12.2	68.044	0	16.102	10	1.97717	0.013519	1.16759	0.503544	AFT93207.1	DNA mismatch repair protein [Francisella tularensis subsp. holarctica FSC200]	FTS_1536	mutL	2.24635	Replication, recombination and repair	L	COG0323	MutL	DNA mismatch repair ATPase MutL	Mismatch repair	mutL, DNA mismatch repair protein MutL	K03572	This protein is involved in the repair of mismatches in DNA. It is required for dam-dependent methyl-directed DNA mismatch repair. May act as a molecular matchmaker , a protein that promotes the formation of a stable complex between two or more DNA-binding proteins in an ATP-dependent manner without itself being part of a final effector complex (By similarity)	GO:0000018;GO:0000166;GO:0001882;GO:0001883;GO:0003674;GO:0003676;GO:0003677;GO:0003697;GO:0003824;GO:0005488;GO:0005524;GO:0005575;GO:0005622;GO:0005623;GO:0006139;GO:0006152;GO:0006163;GO:0006195;GO:0006200;GO:0006259;GO:0006281;GO:0006298;GO:0006725;GO:0006753;GO:0006793;GO:0006796;GO:0006807;GO:0006950;GO:0006974;GO:0008150;GO:0008152;GO:0009056;GO:0009116;GO:0009117;GO:0009119;GO:0009123;GO:…	Cytoplasmic
-7.33308	-7.38613	-7.85109	-7.65861	-6.42591	-6.46868	-6.37491	-6.40783	28	68.5	38.458	0	323.31	1229	4.05068	0.0111242	1.13789	0.536052	AFT93284.1	U61 family peptidase [Francisella tularensis subsp. holarctica FSC200]	FTS_1636		2.20059	Defense mechanisms	V							L,D-carboxypeptidase	GO:0005575;GO:0005622;GO:0005623;GO:0005737;GO:0044424;GO:0044464	Unknown
-9.65311	-9.30296	-9.84918	-9.43797	-8.2568	-8.17824	-8.55011	-8.70806	11	35.5	58.662	0	323.31	162	3.22962	0.0120906	1.1375	0.523526	AFT92373.1	membrane protein of unknown function [Francisella tularensis subsp. holarctica FSC200]	FTS_0429		2.2											Unknown
-13.8837	-13.7105	-13.6038	-13.8853	-12.1652	-12.4836	-12.9904	-12.9582	5	18.7	22.686	0	29.099	18	2.75063	0.0131629	1.12147	0.507374	AFT93261.1	hypothetical protein FTS_1607 [Francisella tularensis subsp. holarctica FSC200]	FTS_1607		2.17569											Unknown
-15.108	-14.5044	-15.2829	-14.2753	-14.0081	-13.8595	-13.3538	-13.5133	17	50.3	51.988	0	87.112	58	2.10361	0.0155062	1.10899	0.485651	AFT93136.1	cytosol aminopeptidase [Francisella tularensis subsp. holarctica FSC200]	FTS_1445	pepA	2.15694	Amino acid transport and metabolism	E	COG0260	PepB	Leucyl aminopeptidase	Glutathione metabolism;Metabolic pathways	CARP, leucyl aminopeptidase [EC:3.4.11.1]	K01255	Presumably involved in the processing and regular turnover of intracellular proteins. Catalyzes the removal of unsubstituted N-terminal amino acids from various peptides (By similarity)	GO:0003674;GO:0003824;GO:0005575;GO:0005622;GO:0005623;GO:0005737;GO:0006508;GO:0008150;GO:0008152;GO:0008233;GO:0008235;GO:0008237;GO:0008238;GO:0016787;GO:0019538;GO:0043170;GO:0044238;GO:0044424;GO:0044464;GO:0070011;GO:0071704	Cytoplasmic
-14.8837	-14.6659	-14.5334	-15.0452	-13.4606	-13.1909	-13.643	-14.4022	10	30.8	39.722	0	34.183	28	2.10113	0.0154585	1.10785	0.485138	AFT92811.1	histidine acid phosphatase [Francisella tularensis subsp. holarctica FSC200]	FTS_0996		2.15524											Unknown
-9.80096	-9.22155	-9.64362	-13.4171	-9.51836	-9.53529	-9.37175	-9.23334	2	16.9	9.2585	0	21.34	20	0.522596	0.0321889	1.10613	0.371718	AFT92343.1	hypothetical protein FTS_0394 [Francisella tularensis subsp. holarctica FSC200]	FTS_0394		2.15267											CytoplasmicMembrane
-17.6544	-18.6006	-17.6773	-17.8408	-17.3666	-17.3511	-16.4327	-16.2649	2	16.8	22.456	0	5.8672	4	1.59431	0.0172888	1.08942	0.459927	AFT92854.1	hypothetical protein FTS_1048 [Francisella tularensis subsp. holarctica FSC200]	FTS_1048		2.12789	Function unknown	S							cbs domain containing protein		Cytoplasmic
-15.9226	-15.7237	-15.9593	-15.5897	-15.0192	-14.7875	-14.4916	-14.5774	8	32.2	30.959	0	18.677	32	3.4978	0.0136151	1.07988	0.503122	AFT92212.1	elongation factor Ts [Francisella tularensis subsp. holarctica FSC200]	FTS_0222	tsf	2.11386	Translation, ribosomal structure and biogenesis	J	COG0264	Tsf	Translation elongation factor EF-Ts		tsf, elongation factor Ts	K02357	Associates with the EF-Tu.GDP complex and induces the exchange of GDP to GTP. It remains bound to the aminoacyl-tRNA.EF- Tu.GTP complex up to the GTP hydrolysis stage on the ribosome (By similarity)	GO:0003674;GO:0003676;GO:0003723;GO:0003746;GO:0005488;GO:0005575;GO:0005618;GO:0005622;GO:0005623;GO:0005737;GO:0005829;GO:0005886;GO:0006412;GO:0006414;GO:0008135;GO:0008150;GO:0008152;GO:0008270;GO:0009058;GO:0009059;GO:0009987;GO:0010467;GO:0016020;GO:0019538;GO:0030312;GO:0034645;GO:0040007;GO:0043167;GO:0043169;GO:0043170;GO:0044237;GO:0044238;GO:0044249;GO:0044260;GO:0044267;GO:0044424;GO:…	Cytoplasmic
-13.4521	-12.636	-14.035	-12.7333	-11.9152	-12.4099	-11.945	-12.3886	23	45.3	54.535	0	159.64	95	1.59263	0.0186547	1.04944	0.445525	AFT92567.1	outer membrane efflux protein [Francisella tularensis subsp. holarctica FSC200]	FTS_0687		2.06972	Cell wall/membrane/envelope biogenesis	M							RND efflux system, outer membrane lipoprotein	GO:0003674;GO:0005215;GO:0006810;GO:0008150;GO:0009987;GO:0015562;GO:0022857;GO:0044699;GO:0044763;GO:0044765;GO:0051179;GO:0051234;GO:0055085	OuterMembrane
-11.6719	-11.3231	-11.9268	-10.6676	-10.4594	-10.4542	-10.2	-10.308	15	96.6	19.202	0	133.05	99	2.00733	0.0171843	1.04197	0.457012	AFT93373.1	F0F1 ATP synthase subunit delta [Francisella tularensis subsp. holarctica FSC200]	FTS_1754	atpH	2.05904	Energy production and conversion	C	COG0712	AtpH	FoF1-type ATP synthase, delta subunit	Metabolic pathways;Oxidative phosphorylation	ATPF1D, F-type H+transporting ATPase subunit delta	K02113	F(1)F(0) ATP synthase produces ATP from ADP in the presence of a proton or sodium gradient. F-type ATPases consist of two structural domains, F(1) containing the extramembraneous catalytic core and F(0) containing the membrane proton channel, linked together by a central stalk and a peripheral stalk. During catalysis, ATP synthesis in the catalytic domain of F(1) is coupled via a rotary mechanism…	GO:0003674;GO:0003824;GO:0005215;GO:0005575;GO:0005622;GO:0005623;GO:0005886;GO:0006139;GO:0006152;GO:0006163;GO:0006164;GO:0006195;GO:0006200;GO:0006725;GO:0006753;GO:0006754;GO:0006793;GO:0006796;GO:0006807;GO:0006810;GO:0006811;GO:0006812;GO:0006818;GO:0008150;GO:0008152;GO:0008324;GO:0009056;GO:0009058;GO:0009116;GO:0009117;GO:0009119;GO:0009123;GO:0009124;GO:0009125;GO:0009126;GO:0009127;GO:…	Cytoplasmic
-16.0863	-17.2731	-17.3759	-16.3545	-15.8265	-15.77	-15.7429	-15.608	2	15.7	23.434	0	6.408	4	1.71035	0.0185988	1.03558	0.444959	AFT92286.1	dephospho-CoA kinase [Francisella tularensis subsp. holarctica FSC200]	FTS_0307	coaE	2.04994	Coenzyme transport and metabolism	H	COG0237	CoaE	Dephospho-CoA kinase	Metabolic pathways;Pantothenate and CoA biosynthesis	coaE, dephospho-CoA kinase [EC:2.7.1.24]	K00859	Catalyzes the phosphorylation of the 3'-hydroxyl group of dephosphocoenzyme A to form coenzyme A (By similarity)	GO:0000166;GO:0001882;GO:0001884;GO:0002135;GO:0003674;GO:0003824;GO:0004140;GO:0005488;GO:0005575;GO:0005622;GO:0005623;GO:0005737;GO:0005829;GO:0006139;GO:0006163;GO:0006164;GO:0006725;GO:0006732;GO:0006753;GO:0006793;GO:0006796;GO:0006807;GO:0008150;GO:0008152;GO:0009058;GO:0009108;GO:0009116;GO:0009117;GO:0009119;GO:0009150;GO:0009152;GO:0009163;GO:0009165;GO:0009259;GO:0009260;GO:0009987;GO:…	Cytoplasmic
-16.6982	-17.1097	-19.142	-19.1342	-16.309	-18.7467	-16.355	-16.7258	3	11.3	43.092	0	5.0243	15	0.522708	0.0396865	0.986898	0.34382	AFT92660.1	P-pantothenate cysteine ligase/P-pantothenoylcysteine decarboxylase [Francisella tularensis subsp. holarctica FSC200]	FTS_0801	dfp	1.98192	Coenzyme transport and metabolism	H	COG0452	CoaBC	Phosphopantothenoylcysteine synthetase/decarboxylase	Metabolic pathways;Pantothenate and CoA biosynthesis	coaBC, phosphopantothenoylcysteine decarboxylase / phosphopantothenate--cysteine ligase [EC:4.1.1.36 6.3.2.5]	K13038	Phosphopantothenoylcysteine decarboxylase	GO:0000166;GO:0003674;GO:0003824;GO:0004632;GO:0004633;GO:0005488;GO:0006139;GO:0006163;GO:0006164;GO:0006259;GO:0006725;GO:0006732;GO:0006753;GO:0006793;GO:0006796;GO:0006807;GO:0008150;GO:0008152;GO:0009058;GO:0009108;GO:0009116;GO:0009117;GO:0009119;GO:0009150;GO:0009152;GO:0009163;GO:0009165;GO:0009259;GO:0009260;GO:0009987;GO:0010181;GO:0015936;GO:0015937;GO:0016829;GO:0016830;GO:0016831;GO:…	Cytoplasmic
-17.46	-18.4461	-17.608	-18.5231	-17.5859	-16.5253	-17.0939	-16.915	3	11.2	49.666	0	6.0796	8	1.4897	0.0229302	0.979247	0.416099	AFT92407.1	glycine dehydrogenase subunit 1 [Francisella tularensis subsp. holarctica FSC200]	FTS_0481	gcvP1	1.97144	Amino acid transport and metabolism	E	COG0403	GcvP1	Glycine cleavage system protein P (pyridoxal-binding), N-terminal domain	Biosynthesis of antibiotics;Biosynthesis of secondary metabolites;Carbon metabolism;Glycine, serine and threonine metabolism;Glyoxylate and dicarboxylate metabolism;Metabolic pathways	gcvPA, glycine dehydrogenase subunit 1 [EC:1.4.4.2]	K00282	The glycine cleavage system catalyzes the degradation of glycine. The P protein binds the alpha-amino group of glycine through its pyridoxal phosphate cofactor		Cytoplasmic
-17.9359	-18.9586	-17.0861	-17.7786	-16.9892	-16.8166	-16.9286	-17.2342	5	15.4	47.491	0	8.9679	5	1.26755	0.026625	0.94766	0.395441	AFT93109.1	glycosyl transferase, group 1 [Francisella tularensis subsp. holarctica FSC200]	FTS_1403	waaG	1.92874	Cell wall/membrane/envelope biogenesis	M	COG0438	RfaB	Glycosyltransferase involved in cell wall bisynthesis		wbpZ, rhamnosyl/mannosyltransferase [EC:2.4.1.-]	K12995	glycosyl transferase group 1	GO:0000271;GO:0003674;GO:0003824;GO:0005575;GO:0005618;GO:0005623;GO:0005975;GO:0005976;GO:0006629;GO:0008150;GO:0008152;GO:0008610;GO:0008653;GO:0009058;GO:0009059;GO:0009103;GO:0009243;GO:0009274;GO:0009276;GO:0009987;GO:0016051;GO:0030312;GO:0030313;GO:0031975;GO:0033692;GO:0034637;GO:0034645;GO:0043170;GO:0044237;GO:0044238;GO:0044249;GO:0044255;GO:0044260;GO:0044262;GO:0044264;GO:0044464;GO:…	Cytoplasmic
-11.6826	-13.0495	-12.6574	-13.5762	-11.7724	-12.3376	-11.4755	-11.6286	5	11.7	44.845	0	32.498	20	1.10748	0.0295686	0.937911	0.384073	AFT93175.1	major facilitator transporter [Francisella tularensis subsp. holarctica FSC200]	FTS_1492		1.91575									transporter	GO:0003674;GO:0005215;GO:0005575;GO:0005623;GO:0005886;GO:0006810;GO:0008150;GO:0016020;GO:0044464;GO:0051179;GO:0051234;GO:0071944	CytoplasmicMembrane
-16.7237	-17.0285	-17.999	-17.343	-16.177	-16.6943	-16.6441	-15.9514	3	17.4	27.345	0	7.0085	4	1.48915	0.0280225	0.906871	0.389651	AFT93249.1	hypothetical protein FTS_1593 [Francisella tularensis subsp. holarctica FSC200]	FTS_1593		1.87497											Unknown
-10.5892	-10.8501	-10.5996	-10.9041	-9.71573	-9.69342	-9.99126	-10.0465	6	62.1	15.059	0	85.046	95	3.40566	0.0234798	0.874028	0.411665	AFT93007.1	hypothetical protein FTS_1258 [Francisella tularensis subsp. holarctica FSC200]	FTS_1258		1.83277											Unknown
-14.0131	-13.813	-13.8886	-12.8008	-12.5709	-12.6265	-12.7276	-13.1091	5	63.3	11.11	0	15.998	17	1.54063	0.0312849	0.870374	0.377715	AFT92930.1	sigma54 modulation protein [Francisella tularensis subsp. holarctica FSC200]	FTS_1155	yhbH	1.82814	Translation, ribosomal structure and biogenesis	J	COG1544	RaiA	Ribosome-associated translation inhibitor RaiA		yhbH, putative sigma-54 modulation protein	K05808	modulation protein	GO:0003674;GO:0005488;GO:0005575;GO:0005622;GO:0005623;GO:0005737;GO:0005840;GO:0006355;GO:0006417;GO:0008150;GO:0009889;GO:0009890;GO:0009892;GO:0010468;GO:0010556;GO:0010558;GO:0010605;GO:0010608;GO:0017148;GO:0019219;GO:0019222;GO:0030529;GO:0031323;GO:0031324;GO:0031326;GO:0031327;GO:0032268;GO:0032269;GO:0032991;GO:0043021;GO:0043022;GO:0043024;GO:0043226;GO:0043228;GO:0043229;GO:0043232;GO:…	Cytoplasmic
-14.4041	-12.2005	-14.2925	-12.2719	-12.8526	-12.9005	-11.9931	-11.9811	5	8.6	62.331	0	34.017	44	0.617095	0.0475767	0.860451	0.323213	AFT93435.1	potassium-transporting ATPase subunit A [Francisella tularensis subsp. holarctica FSC200]	FTS_1832	kdpA	1.81561	Inorganic ion transport and metabolism	P	COG2060	KdpA	K+-transporting ATPase, A chain	Two-component system	kdpA, K+transporting ATPase ATPase A chain [EC:3.6.3.12]	K01546	One of the components of the high-affinity ATP-driven potassium transport (or KDP) system, which catalyzes the hydrolysis of ATP coupled with the exchange of hydrogen and potassium ions (By similarity)	GO:0003674;GO:0003824;GO:0005215;GO:0005488;GO:0005575;GO:0005618;GO:0005623;GO:0005886;GO:0006139;GO:0006152;GO:0006163;GO:0006195;GO:0006200;GO:0006725;GO:0006753;GO:0006793;GO:0006796;GO:0006807;GO:0006810;GO:0006811;GO:0006812;GO:0006813;GO:0008150;GO:0008152;GO:0008324;GO:0008556;GO:0009056;GO:0009116;GO:0009117;GO:0009119;GO:0009123;GO:0009125;GO:0009126;GO:0009128;GO:0009141;GO:0009143;GO:…	CytoplasmicMembrane
-11.3712	-11.0916	-11.2885	-11.0625	-10.3568	-10.3802	-10.3801	-10.4377	18	74.6	34.1	0	204.88	158	4.37444	0.0272655	0.814742	0.392251	AFT92055.1	S49 family serine peptidase [Francisella tularensis subsp. holarctica FSC200]	FTS_0007		1.75898	Posttranslational modification, protein turnover, chaperones	O	COG0616	SppA	Periplasmic serine protease, ClpP class		sppA, protease IV [EC:3.4.21.-]	K04773	Signal peptide peptidase	GO:0005575;GO:0005623;GO:0005886;GO:0016020;GO:0044464;GO:0071944	CytoplasmicMembrane
-17.4988	-17.1664	-17.9642	-17.7236	-16.8146	-16.6522	-16.2268	-17.4855	3	12.5	28.202	0	7.0072	7	1.35889	0.0395795	0.793439	0.343225	AFT92166.1	shikimate 5-dehydrogenase [Francisella tularensis subsp. holarctica FSC200]	FTS_0169	aroE	1.7332	Amino acid transport and metabolism	E	COG0169	AroE	Shikimate 5-dehydrogenase	Biosynthesis of amino acids;Biosynthesis of antibiotics;Biosynthesis of secondary metabolites;Metabolic pathways;Phenylalanine, tyrosine and tryptophan biosynthesis	aroE, shikimate dehydrogenase [EC:1.1.1.25]	K00014	shikimate dehydrogenase		Cytoplasmic
-11.9043	-12.578	-12.0005	-12.231	-11.5567	-11.552	-11.3043	-11.2918	3	49.6	12.094	0	57.267	25	2.38779	0.039252	0.752232	0.347117	AFT93353.1	preprotein translocase subunit SecG [Francisella tularensis subsp. holarctica FSC200]	FTS_1734	secG	1.6844	Intracellular trafficking, secretion, and vesicular transport	U	COG1314	SecG	Preprotein translocase subunit SecG	Bacterial secretion system;Protein export;Quorum sensing	secG, preprotein translocase subunit SecG	K03075	Preprotein translocase subunit SecG	GO:0005575;GO:0005623;GO:0005886;GO:0006810;GO:0006886;GO:0008104;GO:0008150;GO:0009306;GO:0009987;GO:0015031;GO:0016020;GO:0032940;GO:0033036;GO:0034613;GO:0043952;GO:0044464;GO:0044699;GO:0044763;GO:0044765;GO:0045184;GO:0046903;GO:0046907;GO:0051179;GO:0051234;GO:0051641;GO:0051649;GO:0055085;GO:0065002;GO:0070727;GO:0071702;GO:0071806;GO:0071944	CytoplasmicMembrane
-9.18124	-9.20485	-9.01226	-8.66506	-8.35326	-8.27073	-8.22584	-8.2189	37	90.8	49.864	0	323.31	608	2.95205	0.0382016	0.748668	0.351764	AFT93370.1	F0F1 ATP synthase subunit beta [Francisella tularensis subsp. holarctica FSC200]	FTS_1751	atpD	1.68024	Energy production and conversion	C	COG0055	AtpD	FoF1-type ATP synthase, beta subunit	Metabolic pathways;Oxidative phosphorylation	ATPF1B, F-type H+transporting ATPase subunit beta [EC:3.6.3.14]	K02112	Produces ATP from ADP in the presence of a proton gradient across the membrane. The catalytic sites are hosted primarily by the beta subunits (By similarity)	GO:0003674;GO:0003824;GO:0005215;GO:0005575;GO:0005576;GO:0005618;GO:0005622;GO:0005623;GO:0005737;GO:0005829;GO:0005886;GO:0006139;GO:0006152;GO:0006163;GO:0006164;GO:0006195;GO:0006200;GO:0006725;GO:0006753;GO:0006754;GO:0006793;GO:0006796;GO:0006807;GO:0006810;GO:0006811;GO:0006812;GO:0006818;GO:0008150;GO:0008152;GO:0008324;GO:0009056;GO:0009058;GO:0009116;GO:0009117;GO:0009119;GO:0009123;GO:…	Cytoplasmic
iBAQ membrane 11-Ma	iBAQ membrane 11-Mb	iBAQ membranes 13-Ma	iBAQ membranes 13-Mb	iBAQ 10-OMVa	iBAQ 10-OMVb	iBAQ 12-OMVa	iBAQ 12-OMVb	Unique peptides	Unique sequence coverage [%]	Mol. weight [kDa]	Q-value	Score	MS/MS count	Valid values	Valid values membrane	Valid values OMV		Protein IDs	protein name	locus tag	gene	OMV/membrane	COG category	COG code	COG	COG name	COG definition	KEGG PATHWAY	KEGG definition	KO	eGG NOG HMM description	GO terms	Localization PSORT
NaN	NaN	NaN	NaN	-15.8766	-15.912	-16.5721	-18.6996	2	9	25.194	0.0025445	2.1496	4	4	0	4		AFT92089.1	hypothetical protein FTS_0055 [Francisella tularensis subsp. holarctica FSC200]	FTS_0055		OMV	General function prediction only	R	COG0325	YggS	Uncharacterized pyridoxal phosphate-containing protein, affects Ilv metabolism, UPF0001 family		yggS, PLP dependent protein	K06997	alanine racemase domain protein	GO:0003674;GO:0005488;GO:0030170;GO:0043167;GO:0043168;GO:0048037	Cytoplasmic
NaN	NaN	NaN	NaN	-13.896	-13.5845	-13.3755	-13.4439	13	24.8	78.976	0	70.568	47	4	0	4		AFT92110.1	chitinase [Francisella tularensis subsp. holarctica FSC200]	FTS_0083	chiB	OMV	Carbohydrate transport and metabolism	G	COG3325	ChiA	Chitinase, GH18 family	Amino sugar and nucleotide sugar metabolism;Metabolic pathways	E3.2.1.14, chitinase [EC:3.2.1.14]	K01183	chitinase		Periplasmic
NaN	-21.5428	NaN	NaN	-18.0487	-19.23	-17.757	-16.7961	2	11.2	33.163	0	4.9437	2	5	1	4		AFT92136.1	branched-chain amino acid aminotransferase protein (class IV) [Francisella tularensis subsp. holarctica FSC200]	FTS_0122	ilvE	OMV	Amino acid transport and metabolism;Coenzyme transport and metabolism	E;H	COG0115	IlvE	Branched-chain amino acid aminotransferase/4-amino-4-deoxychorismate lyase	2-Oxocarboxylic acid metabolism;Biosynthesis of amino acids;Biosynthesis of antibiotics;Biosynthesis of secondary metabolites;Cysteine and methionine metabolism;Metabolic pathways;Pantothenate and CoA biosynthesis;Valine, leucine and isoleucine biosynthesis;Valine, leucine and isoleucine degradation	E2.6.1.42, branched-chain amino acid aminotransferase [EC:2.6.1.42]	K00826	Branched-chain amino acid aminotransferase	GO:0003674;GO:0003824;GO:0004084;GO:0005488;GO:0005515;GO:0006082;GO:0006520;GO:0006531;GO:0006532;GO:0006551;GO:0006573;GO:0006807;GO:0008150;GO:0008152;GO:0008483;GO:0008652;GO:0009058;GO:0009066;GO:0009067;GO:0009081;GO:0009082;GO:0009098;GO:0009099;GO:0009987;GO:0016053;GO:0016740;GO:0016769;GO:0019752;GO:0042802;GO:0043436;GO:0043648;GO:0043650;GO:0044237;GO:0044238;GO:0044249;GO:0044281;GO:…	Cytoplasmic
NaN	NaN	NaN	-18.4839	-9.57791	-9.40619	-9.25037	-9.4102	14	68.4	16.718	0	75.034	59	5	1	4		AFT92167.1	hypothetical protein FTS_0170 [Francisella tularensis subsp. holarctica FSC200]	FTS_0170		OMV											Unknown
NaN	NaN	NaN	NaN	-12.0015	-11.961	-11.5847	-11.6142	9	57.1	22.981	0	96.729	39	4	0	4		AFT92267.1	hypothetical protein FTS_0282 [Francisella tularensis subsp. holarctica FSC200]	FTS_0282		OMV											Unknown
NaN	NaN	NaN	NaN	-12.0619	-12.2457	-12.4963	-12.5739	3	51.9	15.291	0	25.966	19	4	0	4		AFT92281.1	hypothetical protein FTS_0297 [Francisella tularensis subsp. holarctica FSC200]	FTS_0297		OMV											Unknown
NaN	NaN	NaN	NaN	-13.9905	-13.826	-12.2248	-12.9436	2	23.5	8.7085	0	15.715	5	4	0	4		AFT92294.1	hypothetical protein FTS_0318 [Francisella tularensis subsp. holarctica FSC200]	FTS_0318		OMV											Unknown
NaN	NaN	NaN	-16.0449	-10.8618	-10.6042	-10.546	-11.0252	2	70.4	8.3812	0	19.924	11	5	1	4		AFT92307.1	hypothetical protein FTS_0333 [Francisella tularensis subsp. holarctica FSC200]	FTS_0333		OMV											Unknown
NaN	NaN	-19.5814	NaN	-18.3454	NaN	-17.917	-17.6447	2	8.7	36.677	0.0025806	2.3586	0	4	1	3		AFT92319.1	NAD(P)H-dependent glycerol-3-phosphate dehydrogenase [Francisella tularensis subsp. holarctica FSC200]	FTS_0363	gpsA	OMV	Energy production and conversion	C	COG0240	GpsA	Glycerol-3-phosphate dehydrogenase	Biosynthesis of secondary metabolites;Glycerophospholipid metabolism	gpsA, glycerol-3-phosphate dehydrogenase (NAD(P)) [EC:1.1.1.94]	K00057	NAD(P)H-dependent glycerol-3-phosphate dehydrogenase	GO:0003674;GO:0003824;GO:0004367;GO:0005575;GO:0005622;GO:0005623;GO:0005737;GO:0006072;GO:0006629;GO:0006644;GO:0006650;GO:0006793;GO:0006796;GO:0008150;GO:0008152;GO:0008610;GO:0008654;GO:0009058;GO:0009987;GO:0016491;GO:0016614;GO:0016616;GO:0019637;GO:0044237;GO:0044238;GO:0044249;GO:0044255;GO:0044424;GO:0044464;GO:0044710;GO:0045017;GO:0046474;GO:0046486;GO:0047952;GO:0052646;GO:0055114;GO:…	Cytoplasmic
NaN	NaN	-19.4764	NaN	-13.1335	-13.2397	-12.326	-12.8835	9	36	30.314	0	58.862	20	5	1	4		AFT92350.1	hypothetical protein FTS_0401 [Francisella tularensis subsp. holarctica FSC200]	FTS_0401		OMV	Secondary metabolites biosynthesis, transport and catabolism;General function prediction only	Q							Methyltransferase		Cytoplasmic
NaN	NaN	NaN	NaN	-14.983	-15.2144	-15.7003	-15.9414	2	16.7	14.263	0	3.9505	5	4	0	4		AFT92529.1	hypothetical protein FTS_0639 [Francisella tularensis subsp. holarctica FSC200]	FTS_0639		OMV											CytoplasmicMembrane
NaN	-17.1253	NaN	NaN	-10.8299	-10.7067	-10.8037	-10.9984	3	35.4	14.728	0	31.933	13	5	1	4		AFT92612.1	hypothetical protein FTS_0738 [Francisella tularensis subsp. holarctica FSC200]	FTS_0738		OMV											Unknown
NaN	NaN	NaN	NaN	-15.7891	-15.6142	-15.311	-15.3388	4	24.7	29.331	0	16.419	14	4	0	4		AFT92633.1	methyltransferase [Francisella tularensis subsp. holarctica FSC200]	FTS_0765		OMV	Function unknown	S							Methyl-transferase		Cytoplasmic
-20.5384	NaN	NaN	NaN	-13.7701	-13.5327	-14.5395	-15.2319	2	5.9	41.49	0.0026178	2.5688	5	5	1	4		AFT92817.1	radical SAM superfamily protein [Francisella tularensis subsp. holarctica FSC200]	FTS_1004		OMV	Translation, ribosomal structure and biogenesis	J	COG0820	RlmN	Adenine C2-methylase RlmN of 23S rRNA A2503 and tRNA A37		rlmN, 23S rRNA (adenine2503-C2)-methyltransferase [EC:2.1.1.192]	K06941	Specifically methylates position 2 of adenine 2503 in 23S rRNA and position 2 of adenine 37 in tRNAs. m2A2503 modification seems to play a crucial role in the proofreading step occurring at the peptidyl transferase center and thus would serve to optimize ribosomal fidelity (By similarity)	GO:0000049;GO:0000154;GO:0001510;GO:0002935;GO:0003674;GO:0003676;GO:0003723;GO:0003824;GO:0005488;GO:0005575;GO:0005622;GO:0005623;GO:0005737;GO:0006139;GO:0006364;GO:0006396;GO:0006399;GO:0006400;GO:0006725;GO:0006807;GO:0008033;GO:0008150;GO:0008152;GO:0008168;GO:0008169;GO:0008173;GO:0008175;GO:0008649;GO:0008757;GO:0009451;GO:0009987;GO:0010467;GO:0016070;GO:0016072;GO:0016426;GO:0016433;GO:…	Cytoplasmic
NaN	NaN	NaN	-19.4508	-11.339	-11.4014	-11.0209	-10.9518	15	65.3	27.626	0	111.39	46	5	1	4		AFT92980.1	hypothetical protein FTS_1221 [Francisella tularensis subsp. holarctica FSC200]	FTS_1221		OMV											Unknown
NaN	NaN	NaN	NaN	-16.7775	-16.6105	-16.4	-16.7272	2	10	32.621	0	7.9229	3	4	0	4		AFT93014.1	hypothetical protein FTS_1270 [Francisella tularensis subsp. holarctica FSC200]	FTS_1270		OMV											Unknown
NaN	NaN	NaN	NaN	-16.4328	-17.1389	-17.5383	-18.6464	3	34	11.221	0.0013423	3.0251	3	4	0	4		AFT93049.1	hypothetical protein FTS_1318 [Francisella tularensis subsp. holarctica FSC200]	FTS_1318		OMV											Unknown
-21.4129	NaN	NaN	NaN	-16.4307	-15.6167	-15.358	-15.73	3	18.2	30.117	0	4.1511	5	5	1	4		AFT93180.1	2-dehydro-3-deoxyphosphooctonate aldolase [Francisella tularensis subsp. holarctica FSC200]	FTS_1499	kdsA	OMV	Cell wall/membrane/envelope biogenesis	M	COG2877	KdsA	3-deoxy-D-manno-octulosonic acid (KDO) 8-phosphate synthase	Lipopolysaccharide biosynthesis;Metabolic pathways	kdsA, 2-dehydro-3-deoxyphosphooctonate aldolase (KDO 8-P synthase) [EC:2.5.1.55]	K01627	Phospho-2-dehydro-3-deoxyoctonate aldolase	GO:0005575;GO:0005622;GO:0005623;GO:0005737;GO:0044424;GO:0044464	Cytoplasmic
NaN	NaN	NaN	NaN	-10.8579	-10.6975	-10.446	-10.4484	8	60	16.177	0	157.82	39	4	0	4		AFT93352.1	hypothetical protein FTS_1731 [Francisella tularensis subsp. holarctica FSC200]	FTS_1731		OMV	Function unknown	S							Peptidase propeptide and YPEB domain		Unknown
NaN	NaN	NaN	NaN	-19.1465	-17.7942	-19.2363	NaN	2	8.5	52.395	0.0075282	1.8993	3	3	0	3		AFT93411.1	aspartyl/glutamyl-tRNA amidotransferase subunit A [Francisella tularensis subsp. holarctica FSC200]	FTS_1797	gatA	OMV	Translation, ribosomal structure and biogenesis	J	COG0154	GatA	Asp-tRNAAsn/Glu-tRNAGln amidotransferase A subunit or related amidase	Aminoacyl-tRNA biosynthesis;Metabolic pathways	gatA, aspartyl-tRNA(Asn)/glutamyl-tRNA(Gln) amidotransferase subunit A [EC:6.3.5.6 6.3.5.7]	K02433	Allows the formation of correctly charged Gln-tRNA(Gln) through the transamidation of misacylated Glu-tRNA(Gln) in organisms which lack glutaminyl-tRNA synthetase. The reaction takes place in the presence of glutamine and ATP through an activated gamma-phospho-Glu-tRNA(Gln) (By similarity)	GO:0003674;GO:0003824;GO:0004040;GO:0008150;GO:0008152;GO:0016787;GO:0016810;GO:0016811;GO:0040007	Cytoplasmic
