# Supplementary material for: Francisella tularensis subsp. holarctica Releases Differentially Loaded Outer Membrane Vesicles Under Various Stress Conditions
Source: Front Microbiol. 2019 Oct 10;10:2304. doi: 10.3389/fmicb.2019.02304 (PMC6795709; doi:10.3389/fmicb.2019.02304)
Supplement: TABLE S3 — Proteomic comparison of OMV from different cultivation conditions. [file Table_3.xlsx]

## Sheet: Suppl. table header
		Supplementary table 3.	Proteomic comparison of OMV from different cultivation conditions. List of all ANOVA-significant proteins OMV-enriched vs. membranes are highlighted.

## Sheet: Supplementary table 3
agar	25C	42C	lowpH	oxidative	control	OMV-enriched	ANOVA Significant	Cluster	Cluster	Unique peptides	Unique sequence coverage [%]	Mol. weight [kDa]	Q-value	Score	Intensity	MS/MS count	-Log ANOVA p value	ANOVA q-value	Protein IDs	protein name	locus tag	gene	OMV/membrane enrichment factor	COG category	COG code	COG	COG name	COG definition	KEGG PATHWAY	KEGG definition	KO	eGG NOG HMM description	GO terms	Localization PSORT		Significant pairs
-6.51306	-4.98373	-5.02766	-7.00348	-3.97867	7.00348	+	+	Cluster 430	Cluster -8	10	67.1	18.395	0	87.913	1037500000	98	6.8422	0	AFT92918.1;AFT92130.1	hypothetical protein FTS_1135 [Francisella tularensis subsp. holarctica FSC200];hypothetical protein FTS_0107 [Francisella tularensis subsp. holarctica FSC200]	FTS_1135;FTS_0107		2.72834											Unknown		25C_lowpH;oxidative_lowpH;agar_lowpH;control_lowpH;oxidative_42C;agar_42C;control_42C;agar_25C;control_25C;agar_oxidative;control_oxidative
-3.99058	-5.92393	5.92393	-5.81638	-5.19163	-4.08228	+	+	Cluster 437	Cluster -33	22	47.8	54.535	0	290.76	4464500000	300	5.99523	0.0201023	AFT92567.1	outer membrane efflux protein [Francisella tularensis subsp. holarctica FSC200]	FTS_0687		2.06972	Cell wall/membrane/envelope biogenesis	M							RND efflux system, outer membrane lipoprotein	GO:0003674;GO:0005215;GO:0006810;GO:0008150;GO:0009987;GO:0015562;GO:0022857;GO:0044699;GO:0044763;GO:0044765;GO:0051179;GO:0051234;GO:0055085	OuterMembrane		25C_lowpH;control_lowpH;agar_lowpH;control_oxidative;agar_oxidative;control_42C;agar_42C;control_25C;agar_25C
-6.7103	-7.62599	7.62599	-4.51788	-6.2215	5.97994	+	+	Cluster 437	Cluster 36	11	34.5	39.722	0	65.632	988590000	108	7.73813	0.0371186	AFT92811.1	histidine acid phosphatase [Francisella tularensis subsp. holarctica FSC200]	FTS_0996		2.15524											Unknown		42C_agar;oxidative_agar;control_agar;oxidative_lowpH;control_lowpH;oxidative_25C;control_25C;control_42C;control_oxidative
-5.28563	-8.31736	8.31736	-5.82981	-6.1715	5.09078	+	+	Cluster 437	Cluster 36	36	73.5	57.243	0	323.31	14175000000	752	7.7531	0.0471188	AFT93426.1	outer membrane protein tolC precursor [Francisella tularensis subsp. holarctica FSC200]	FTS_1817	tolC	3.68662	Cell wall/membrane/envelope biogenesis	M	COG1538	TolC	Outer membrane protein TolC	Bacterial secretion system;beta-Lactam resistance;Cationic antimicrobial peptide (CAMP) resistance;Two-component system	tolC, outer membrane protein	K12340	Outer membrane protein tolc	GO:0003674;GO:0005215;GO:0005575;GO:0005623;GO:0006810;GO:0006811;GO:0006820;GO:0006873;GO:0006875;GO:0006879;GO:0008104;GO:0008150;GO:0009279;GO:0009306;GO:0009987;GO:0010033;GO:0014070;GO:0015031;GO:0015267;GO:0015288;GO:0015562;GO:0015688;GO:0015711;GO:0015850;GO:0015891;GO:0016020;GO:0019725;GO:0019867;GO:0022803;GO:0022829;GO:0022857;GO:0030003;GO:0030312;GO:0030313;GO:0031975;GO:0032940;GO:…	OuterMembrane		42C_lowpH;25C_lowpH;oxidative_lowpH;control_lowpH;42C_agar;25C_agar;oxidative_agar;control_agar;control_42C;control_25C;control_oxidative
-8.14477	-8.91383	8.91383	-6.16119	-6.77643	6.0382	+	+	Cluster 437	Cluster 36	12	59.4	16.134	0	138.98	6124400000	289	8.76382	0.0354932	AFT92827.1	hypothetical protein FTS_1018 [Francisella tularensis subsp. holarctica FSC200]	FTS_1018		4.42739											Unknown		42C_agar;oxidative_agar;control_agar;42C_lowpH;oxidative_lowpH;control_lowpH;42C_25C;oxidative_25C;control_25C;control_42C;control_oxidative
-6.67691	-8.65835	8.65835	5.78476	-5.58007	6.20706	+	+	Cluster 164	Cluster 2	54	74.2	76.93	0	323.31	19672000000	1037	8.2077	0.0484625	AFT92398.1	soluble lytic murein transglycosylase [Francisella tularensis subsp. holarctica FSC200]	FTS_0467	slt	2.65028	Cell wall/membrane/envelope biogenesis	M	COG0741	MltE	Soluble lytic murein transglycosylase and related regulatory proteins (some contain LysM/invasin domains)		slt, soluble lytic murein transglycosylase [EC:4.2.2.-]	K08309	Lytic Murein transglycosylase	GO:0000270;GO:0003674;GO:0003824;GO:0005575;GO:0005623;GO:0006022;GO:0006026;GO:0006027;GO:0006807;GO:0008150;GO:0008152;GO:0008933;GO:0009056;GO:0009057;GO:0009253;GO:0016740;GO:0016757;GO:0030203;GO:0030288;GO:0030312;GO:0030313;GO:0031975;GO:0042597;GO:0043170;GO:0044462;GO:0044464;GO:0071704;GO:0071944;GO:1901135;GO:1901136;GO:1901564;GO:1901565;GO:1901575	Periplasmic		control_25C;agar_25C;42C_25C;control_lowpH;agar_lowpH;42C_lowpH;42C_oxidative;42C_control;42C_agar
-6.76026	-8.11139	8.11139	6.16777	-5.605	6.32717	+	+	Cluster 164	Cluster 2	15	29.5	66.559	0	131.76	1342500000	152	8.05805	0.030877	AFT92582.1	FAD binding family protein [Francisella tularensis subsp. holarctica FSC200]	FTS_0702	mreA	2.64403	Energy production and conversion	C							FAD binding family protein		Periplasmic		oxidative_25C;lowpH_25C;control_25C;42C_25C;lowpH_agar;control_agar;42C_agar;lowpH_oxidative;control_oxidative;42C_oxidative;control_lowpH;42C_lowpH;42C_control
-8.66685	-7.72104	8.66685	-5.99939	7.59472	7.60261	+	+	Cluster 454	Cluster 65	21	56.9	27.938	0	291.83	12996000000	496	9.13712	0.0158266	AFT92178.1	polar amino acid uptake transporter [Francisella tularensis subsp. holarctica FSC200]	FTS_0183		2.58061	Amino acid transport and metabolism	E	COG0077	PheA2	Prephenate dehydratase	Biosynthesis of amino acids;Biosynthesis of antibiotics;Biosynthesis of secondary metabolites;Metabolic pathways;Phenylalanine, tyrosine and tryptophan biosynthesis	pheC, cyclohexadienyl dehydratase [EC:4.2.1.51 4.2.1.91]	K01713	Dehydratase	GO:0005575;GO:0005623;GO:0042597;GO:0044464	Periplasmic		oxidative_25C;lowpH_25C;agar_25C;control_25C;42C_25C;42C_oxidative;42C_lowpH;42C_agar;42C_control
-7.61324	-8.60172	8.60172	-6.28227	7.96898	7.97465	+	+	Cluster 454	Cluster 65	8	27.9	33.216	0	30.918	309830000	66	9.36913	0.00223256	AFT92767.1	beta-lactamase class A [Francisella tularensis subsp. holarctica FSC200]	FTS_0937	blaA	6.27848	Defense mechanisms	V	COG2367	PenP	Beta-lactamase class A	beta-Lactam resistance;Biosynthesis of antibiotics	penP, beta-lactamase class A [EC:3.5.2.6]	K17836	Beta-lactamase	GO:0005575;GO:0005623;GO:0005886;GO:0016020;GO:0044464;GO:0071944	Periplasmic		oxidative_25C;lowpH_25C;control_25C;42C_25C;oxidative_agar;lowpH_agar;control_agar;42C_agar;control_oxidative;42C_oxidative;42C_lowpH;42C_control
-11.06	-10.1429	11.06	-7.31304	9.40235	8.93142	+	+	Cluster 454	Cluster 65	37	72.7	48.033	0	323.31	104720000000	2009	11.0402	0.0190526	AFT92841.1	D-alanyl-D-alanine carboxypeptidase [Francisella tularensis subsp. holarctica FSC200]	FTS_1034	dacD	10.664	Cell wall/membrane/envelope biogenesis	M	COG1686	DacC	D-alanyl-D-alanine carboxypeptidase	Metabolic pathways;Peptidoglycan biosynthesis	dacC, serine-type D-Ala-D-Ala carboxypeptidase (penicillin-binding protein 5/6) [EC:3.4.16.4]	K07258	D-alanyl-D-alanine carboxypeptidase	GO:0000270;GO:0003674;GO:0003824;GO:0004180;GO:0004185;GO:0005488;GO:0005575;GO:0005618;GO:0005623;GO:0005886;GO:0005887;GO:0006022;GO:0006023;GO:0006024;GO:0006807;GO:0008144;GO:0008150;GO:0008152;GO:0008233;GO:0008236;GO:0008238;GO:0008360;GO:0008658;GO:0009002;GO:0009058;GO:0009059;GO:0009252;GO:0009273;GO:0009274;GO:0009276;GO:0009987;GO:0016020;GO:0016021;GO:0016787;GO:0017171;GO:0022603;GO:…	Unknown		oxidative_25C;42C_25C;control_25C;oxidative_agar;42C_agar;control_agar;oxidative_lowpH;42C_lowpH;control_lowpH;42C_oxidative;control_oxidative
-13.2995	-11.4055	13.2995	-11.3238	12.882	12.4201	+	+	Cluster 454	Cluster 65	25	64.3	56.039	0	273.58	4986500000	415	14.1515	0.00327273	AFT92796.1	hypothetical protein FTS_0974 [Francisella tularensis subsp. holarctica FSC200]	FTS_0974		23.4349											Unknown		agar_25C;oxidative_25C;lowpH_25C;control_25C;42C_25C;lowpH_agar;control_agar;42C_agar;42C_oxidative;42C_lowpH;42C_control
-7.32665	-4.18938	6.66654	-4.39597	7.32665	-4.51332	+	+	Cluster 454	Cluster -79	18	57	38.458	0	323.31	12297000000	556	7.20458	0.041292	AFT93284.1	U61 family peptidase [Francisella tularensis subsp. holarctica FSC200]	FTS_1636		2.20059	Defense mechanisms	V							L,D-carboxypeptidase	GO:0005575;GO:0005622;GO:0005623;GO:0005737;GO:0044424;GO:0044464	Unknown		agar_25C;oxidative_25C;lowpH_25C;control_25C;42C_25C;lowpH_agar;control_agar;42C_agar;lowpH_oxidative;control_oxidative;42C_oxidative;42C_lowpH;42C_control
-7.94219	-8.47178	8.47178	7.81764	7.69456	7.73414	+	+	Cluster 414	Cluster 57	11	73.3	22.981	0	119.02	2357000000	167	9.47014	0.0206107	AFT92267.1	hypothetical protein FTS_0282 [Francisella tularensis subsp. holarctica FSC200]	FTS_0282		OMV											Unknown		lowpH_agar;control_agar;42C_agar;oxidative_agar;lowpH_25C;control_25C;42C_25C;oxidative_25C;control_lowpH;42C_lowpH;oxidative_lowpH
-8.72037	-8.43522	8.72037	7.90732	6.22496	8.08751	+	+	Cluster 414	Cluster 57	6	54.2	9.5596	0	105.68	3949700000	210	9.68067	0.00642254	AFT92666.1	hypothetical protein FTS_0814 [Francisella tularensis subsp. holarctica FSC200]	FTS_0814		72.9761											Unknown		25C_agar;42C_agar;control_agar;oxidative_agar;25C_lowpH;42C_lowpH;control_lowpH;oxidative_lowpH;42C_25C;control_25C;oxidative_25C;oxidative_42C;oxidative_control
-8.70802	-7.42536	8.70802	8.29445	8.49442	8.62394	+	+	Cluster 414	Cluster 57	45	81.7	51.977	0	323.31	108240000000	2261	9.78924	0.0124491	AFT92476.1	hypothetical protein FTS_0571 [Francisella tularensis subsp. holarctica FSC200]	FTS_0571		15.4861	Function unknown	S							Inherit from proNOG: Periplasmic Protein		Unknown		25C_agar;lowpH_agar;oxidative_agar;control_agar;42C_agar;lowpH_25C;oxidative_25C;control_25C;42C_25C;oxidative_lowpH;control_lowpH;42C_lowpH;42C_oxidative;42C_control
-9.30863	-7.77509	9.257	7.36541	9.30863	9.19785	+	+	Cluster 414	Cluster 57	23	45.4	65.134	0	204.89	5312500000	399	10.1691	0.0160985	AFT92632.1	gamma-glutamyltranspeptidase [Francisella tularensis subsp. holarctica FSC200]	FTS_0764	ggt	37.621	Amino acid transport and metabolism	E	COG0405	Ggt	Gamma-glutamyltranspeptidase	Cyanoamino acid metabolism;Glutathione metabolism;Metabolic pathways;Taurine and hypotaurine metabolism	ggt, gamma-glutamyltranspeptidase / glutathione hydrolase [EC:2.3.2.2 3.4.19.13]	K00681	Gamma-glutamyltranspeptidase (EC 2.3.2.2)	GO:0003674;GO:0003824;GO:0003840;GO:0005575;GO:0005623;GO:0008150;GO:0008152;GO:0016740;GO:0016746;GO:0016755;GO:0042597;GO:0044464	Periplasmic		agar_25C;lowpH_25C;oxidative_25C;control_25C;42C_25C;lowpH_agar;oxidative_agar;control_agar;42C_agar;oxidative_lowpH;control_lowpH;42C_lowpH
-9.39176	-8.11516	9.05587	6.7907	9.39176	9.09907	+	+	Cluster 414	Cluster 57	14	74.1	25.703	0	323.31	15843000000	553	10.1963	0.0121851	AFT93208.1	hypothetical protein FTS_1538 [Francisella tularensis subsp. holarctica FSC200]	FTS_1538		126.545											Unknown		25C_agar;lowpH_agar;control_agar;oxidative_agar;42C_agar;lowpH_25C;control_25C;oxidative_25C;42C_25C;control_lowpH;oxidative_lowpH;42C_lowpH;42C_control;42C_oxidative
-9.29048	-8.64991	9.29048	6.77872	8.66172	8.6535	+	+	Cluster 414	Cluster 57	11	57.7	25.258	0	174.57	7819800000	322	10.1697	0.0264019	AFT92433.1	membrane protein of unknown function [Francisella tularensis subsp. holarctica FSC200]	FTS_0515	ttg2	18.3463	Lipid transport and metabolism	I	COG2854	MlaC	ABC-type transporter Mla maintaining outer membrane lipid asymmetry, periplasmic MlaC component	ABC transporters	mlaC, phospholipid transport system substrate-binding protein	K07323	Toluene tolerance, Ttg2		Unknown		25C_agar;lowpH_agar;control_agar;oxidative_agar;42C_agar;control_25C;oxidative_25C;42C_25C;control_lowpH;oxidative_lowpH;42C_lowpH;oxidative_control;42C_control;42C_oxidative
-10.2136	-9.09956	10.2136	9.8368	9.13197	9.04025	+	+	Cluster 414	Cluster 57	11	35.1	29.403	0	151.82	2212000000	138	10.9362	0.0176333	AFT92161.1	hypothetical protein FTS_0163 [Francisella tularensis subsp. holarctica FSC200]	FTS_0163		5.72678	Cell cycle control, cell division, chromosome partitioning;Cytoskeleton	D;Z							Inherit from bactNOG: regulator of chromosome condensation, RCC1		Unknown		control_agar;lowpH_agar;25C_agar;42C_agar;oxidative_agar;42C_control;oxidative_control;42C_lowpH;oxidative_lowpH;42C_25C;oxidative_25C
-10.0161	-7.89382	10.0161	8.68984	8.21215	9.10457	+	+	Cluster 414	Cluster 57	20	75.5	25.7	0	323.31	278680000000	3065	10.1014	0.0137733	AFT92965.1	hypothetical protein FTS_1201 [Francisella tularensis subsp. holarctica FSC200]	FTS_1201		126.905											Unknown		oxidative_25C;control_25C;lowpH_25C;42C_25C;oxidative_agar;control_agar;lowpH_agar;42C_agar
-11.151	-7.73881	11.151	9.13876	8.93351	10.2719	+	+	Cluster 414	Cluster 57	10	52.4	19.632	0	108.59	4956400000	260	10.7021	0.0038913	AFT92326.1	methionine sulfoxide reductase B [Francisella tularensis subsp. holarctica FSC200]	FTS_0370	msrB	8.54501	Posttranslational modification, protein turnover, chaperones	O	COG0229	MsrB	Peptide methionine sulfoxide reductase MsrB		msrB, peptide-methionine (R)-S-oxide reductase [EC:1.8.4.12]	K07305	reductase	GO:0003674;GO:0003824;GO:0008113;GO:0008150;GO:0008152;GO:0009405;GO:0016491;GO:0016667;GO:0016671;GO:0044710;GO:0051704;GO:0055114	Cytoplasmic		oxidative_agar;lowpH_agar;control_agar;42C_agar;oxidative_25C;lowpH_25C;control_25C;42C_25C;lowpH_oxidative;control_oxidative;42C_oxidative
-11.2135	-9.06805	11.2135	7.95814	8.95397	9.72469	+	+	Cluster 414	Cluster 57	30	78	33.057	0	323.31	9912500000	649	10.836	0.0447368	AFT92351.1	hypothetical protein FTS_0402 [Francisella tularensis subsp. holarctica FSC200]	FTS_0402		60.9028											Unknown		25C_agar;lowpH_agar;oxidative_agar;control_agar;42C_agar;lowpH_25C;oxidative_25C;control_25C;42C_25C
-10.649	-8.94937	10.649	9.34926	9.52365	9.99306	+	+	Cluster 414	Cluster 57	52	59.6	105.36	0	323.31	14030000000	874	11.0072	0.0126345	AFT93368.1	hypothetical protein FTS_1749 [Francisella tularensis subsp. holarctica FSC200]	FTS_1749		17.5349	Carbohydrate transport and metabolism	G							Glycosyl hydrolases family 18	GO:0003674;GO:0003824;GO:0004553;GO:0004568;GO:0006022;GO:0006026;GO:0006030;GO:0006032;GO:0006040;GO:0006807;GO:0008150;GO:0008152;GO:0009056;GO:0009057;GO:0016787;GO:0016798;GO:0043170;GO:0046348;GO:0071704;GO:1901071;GO:1901072;GO:1901135;GO:1901136;GO:1901564;GO:1901565;GO:1901575	Unknown		25C_agar;lowpH_agar;control_agar;42C_agar;oxidative_agar;lowpH_25C;control_25C;42C_25C;oxidative_25C;control_lowpH;42C_lowpH;oxidative_lowpH
-11.3606	-10.4906	11.3606	8.94592	10.672	11.1265	+	+	Cluster 414	Cluster 57	24	77.4	31.964	0	323.31	19935000000	744	11.9104	0.0188757	AFT92715.1	beta-lactamase class A [Francisella tularensis subsp. holarctica FSC200]	FTS_0870	bla	48.8512	Defense mechanisms	V	COG2367	PenP	Beta-lactamase class A	beta-Lactam resistance;Biosynthesis of antibiotics	penP, beta-lactamase class A [EC:3.5.2.6]	K17836	Beta-lactamase (EC 3.5.2.6)	GO:0005575;GO:0005623;GO:0005886;GO:0016020;GO:0044464;GO:0071944	Periplasmic		25C_agar;lowpH_agar;42C_agar;control_agar;oxidative_agar;lowpH_25C;42C_25C;control_25C;oxidative_25C;42C_lowpH;control_lowpH;oxidative_lowpH
-11.3796	-9.41782	11.3411	9.75737	11.3796	11.2843	+	+	Cluster 414	Cluster 57	15	72.4	27.626	0	176.9	2642600000	175	11.9615	0.0038022	AFT92980.1	hypothetical protein FTS_1221 [Francisella tularensis subsp. holarctica FSC200]	FTS_1221		OMV											Unknown		lowpH_agar;control_agar;oxidative_agar;42C_agar;lowpH_25C;control_25C;oxidative_25C;42C_25C;control_lowpH;oxidative_lowpH;42C_lowpH
-11.8277	-10.9555	11.8277	10.9061	11.2181	11.5633	+	+	Cluster 414	Cluster 57	13	67.9	20.965	0	172.33	10224000000	307	12.5415	0.00935021	AFT93177.1	hypothetical protein FTS_1495 [Francisella tularensis subsp. holarctica FSC200]	FTS_1495		35.2545											Unknown		25C_agar;control_agar;oxidative_agar;lowpH_agar;42C_agar;control_25C;oxidative_25C;lowpH_25C;42C_25C;42C_control;42C_oxidative
-11.3129	-8.39659	11.307	10.3431	11.3129	11.2598	+	+	Cluster 414	Cluster 57	17	63.1	24.215	0	281.5	66613000000	988	11.7243	0.007875	AFT92198.1	pyrrolidone carboxylylate peptidase [Francisella tularensis subsp. holarctica FSC200]	FTS_0203	pcp	35.4589	Posttranslational modification, protein turnover, chaperones	O	COG2039	Pcp	Pyrrolidone-carboxylate peptidase (N-terminal pyroglutamyl peptidase)		pcp, pyroglutamyl-peptidase [EC:3.4.19.3]	K01304	Removes 5-oxoproline from various penultimate amino acid residues except L-proline (By similarity)	GO:0005575;GO:0005622;GO:0005623;GO:0005737;GO:0044424;GO:0044464	Unknown		25C_agar;oxidative_agar;lowpH_agar;control_agar;42C_agar;oxidative_25C;lowpH_25C;control_25C;42C_25C;control_oxidative;42C_oxidative;42C_lowpH
-11.0827	-8.51853	10.8606	9.82026	11.0827	10.6002	+	+	Cluster 414	Cluster 57	16	54.7	35.78	0	199.99	10927000000	473	11.3233	0.00697248	AFT92477.1	hypothetical protein FTS_0572 [Francisella tularensis subsp. holarctica FSC200]	FTS_0572		101.607	Function unknown	S							Curli production assembly/transport component CsgG		Unknown		25C_agar;oxidative_agar;lowpH_agar;control_agar;42C_agar;oxidative_25C;lowpH_25C;control_25C;42C_25C;control_oxidative;42C_oxidative;control_lowpH;42C_lowpH;42C_control
-10.8181	-7.34853	10.541	9.95872	10.8181	10.2668	+	+	Cluster 414	Cluster 57	15	59.9	29.606	0	177.75	4853300000	300	10.9156	0.00335664	AFT92421.1	hypothetical protein FTS_0495 [Francisella tularensis subsp. holarctica FSC200]	FTS_0495		101.952											Periplasmic		25C_agar;lowpH_agar;oxidative_agar;control_agar;42C_agar;lowpH_25C;oxidative_25C;control_25C;42C_25C;oxidative_lowpH;control_lowpH;42C_lowpH;42C_oxidative;42C_control
-6.99376	-7.58836	7.58836	5.66573	5.38572	6.07686	+	+	Cluster 414	Cluster 57	7	57.3	16.177	0	164.53	1712500000	139	7.88963	0.0164483	AFT93352.1	hypothetical protein FTS_1731 [Francisella tularensis subsp. holarctica FSC200]	FTS_1731		OMV	Function unknown	S							Peptidase propeptide and YPEB domain		Unknown		25C_agar;lowpH_agar;oxidative_agar;control_agar;42C_agar;lowpH_25C;oxidative_25C;control_25C;42C_25C;42C_lowpH;42C_oxidative
-7.82938	-7.93728	7.93728	4.63668	4.69844	6.42058	+	+	Cluster 414	Cluster 57	21	59.1	50.98	0	183.97	1861200000	212	8.33925	0.0171299	AFT93439.1	hypothetical protein FTS_1845 [Francisella tularensis subsp. holarctica FSC200]	FTS_1845		3.05269	Function unknown	S							Kelch domain protein		Unknown		25C_agar;lowpH_agar;oxidative_agar;control_agar;42C_agar;lowpH_25C;oxidative_25C;control_25C;42C_25C;oxidative_lowpH;control_lowpH;42C_lowpH;42C_oxidative
-8.33642	-6.5385	8.33642	6.98319	7.54573	6.63694	+	+	Cluster 414	Cluster 57	14	53	39.528	0	70.448	776680000	194	8.51626	0.00328767	AFT92071.1	histidine acid phosphatase [Francisella tularensis subsp. holarctica FSC200]	FTS_0029		56.5146	Signal transduction mechanisms	T							Major acid phosphatase Map		Extracellular		25C_agar;lowpH_agar;control_agar;42C_agar;oxidative_agar;lowpH_25C;control_25C;42C_25C;oxidative_25C;control_lowpH;42C_lowpH;oxidative_lowpH
-9.03822	-5.77491	9.03822	7.83922	7.31666	7.04035	+	+	Cluster 414	Cluster 57	6	23.8	32.621	0	13.577	80312000	22	8.75017	0.0005	AFT93014.1	hypothetical protein FTS_1270 [Francisella tularensis subsp. holarctica FSC200]	FTS_1270		OMV											Unknown		25C_agar;lowpH_agar;oxidative_agar;control_agar;42C_agar;lowpH_25C;oxidative_25C;control_25C;42C_25C;control_lowpH;42C_lowpH;control_oxidative;42C_oxidative
-7.77219	-4.49856	7.77219	7.07305	7.28625	6.71107	+	+	Cluster 414	Cluster 57	67	73.3	82.571	0	323.31	235250000000	3682	7.91042	0.0147564	AFT93160.1	peroxidase/catalase [Francisella tularensis subsp. holarctica FSC200]	FTS_1471	katG	56.7492	Inorganic ion transport and metabolism	P	COG0376	KatG	Catalase (peroxidase I)	Biosynthesis of secondary metabolites;Metabolic pathways;Phenylalanine metabolism;Tryptophan metabolism	katG, catalase-peroxidase [EC:1.11.1.21]	K03782	Bifunctional enzyme with both catalase and broad- spectrum peroxidase activity (By similarity)	GO:0005575;GO:0005576;GO:0005623;GO:0042597;GO:0044464	Unknown		25C_agar;lowpH_agar;control_agar;42C_agar;oxidative_agar;lowpH_25C;control_25C;42C_25C;oxidative_25C;control_lowpH;42C_lowpH;oxidative_lowpH
-7.99876	-5.86178	7.99876	7.32248	7.94153	7.64603	+	+	Cluster 414	Cluster 57	11	67.8	16.718	0	85.492	3431500000	188	8.67851	0.00267647	AFT92167.1	hypothetical protein FTS_0170 [Francisella tularensis subsp. holarctica FSC200]	FTS_0170		OMV											Unknown		25C_agar;lowpH_agar;control_agar;42C_agar;oxidative_agar;lowpH_25C;control_25C;42C_25C;oxidative_25C;42C_lowpH;oxidative_lowpH
-7.60198	-5.92777	7.49687	7.60198	7.23889	7.4962	+	+	Cluster 414	Cluster 57	14	56.2	18.158	0	323.31	45128000000	604	8.51736	0.00363429	AFT93152.1	hypothetical protein FTS_1462 [Francisella tularensis subsp. holarctica FSC200]	FTS_1462		246.397											Unknown		25C_agar;lowpH_agar;control_agar;42C_agar;oxidative_agar;lowpH_25C;control_25C;42C_25C;oxidative_25C
-6.47548	-4.80549	6.15191	6.47548	5.59918	6.19193	+	+	Cluster 414	Cluster 57	20	70.9	19.477	0	323.31	229460000000	3129	7.13165	0.0164024	AFT92056.1	outer membrane protein of unknown function [Francisella tularensis subsp. holarctica FSC200]	FTS_0008		424.208											Periplasmic		oxidative_25C;lowpH_25C;control_25C;42C_25C;oxidative_agar;lowpH_agar;control_agar;42C_agar;42C_oxidative;42C_lowpH;42C_control
-7.77767	6.17917	7.77281	7.77767	-6.7007	6.36827	+	+	Cluster 373	Cluster 45	4	50	8.0151	0	37.821	1565500000	118	8.4904	0.015764	AFT93050.1	hypothetical protein FTS_1319 [Francisella tularensis subsp. holarctica FSC200]	FTS_1319		8.99795											Unknown		lowpH_25C;oxidative_25C;control_25C;42C_25C;lowpH_agar;oxidative_agar;control_agar;42C_agar;control_lowpH;42C_lowpH;control_oxidative;42C_oxidative;42C_control
-6.88406	5.84587	5.80108	6.88406	-3.75453	4.94255	+	+	Cluster 373	Cluster 45	26	72.5	39.945	0	323.31	91948000000	1594	6.69062	0.04056	AFT93021.1	hypothetical protein FTS_1279 [Francisella tularensis subsp. holarctica FSC200]	FTS_1279		6.05745	Signal transduction mechanisms	T	COG0790	TPR	TPR repeat		uncharacterized protein	K07126	Sel1 domain protein repeat-containing protein		Unknown		25C_agar;control_agar;lowpH_agar;oxidative_agar;42C_agar;control_25C;lowpH_25C;oxidative_25C;42C_25C;42C_control;42C_lowpH
-6.89713	6.47346	6.18915	4.14077	6.89713	6.11531	+	+	Cluster 411	Cluster 55	26	61	59.928	0	323.31	24159000000	813	7.0223	0.0466261	AFT92546.1	hypothetical protein FTS_0659 [Francisella tularensis subsp. holarctica FSC200]	FTS_0659		18.899											Unknown		25C_agar;control_agar;oxidative_agar;lowpH_agar;42C_agar;control_25C;oxidative_25C;lowpH_25C;42C_25C;42C_control;42C_oxidative;42C_lowpH
-6.2134	5.08751	5.30278	5.90562	4.97096	6.2134	+	+	Cluster 411	Cluster 55	4	12.4	41.49	0	7.6872	469920000	10	6.20702	0	AFT92817.1	radical SAM superfamily protein [Francisella tularensis subsp. holarctica FSC200]	FTS_1004		OMV	Translation, ribosomal structure and biogenesis	J	COG0820	RlmN	Adenine C2-methylase RlmN of 23S rRNA A2503 and tRNA A37		rlmN, 23S rRNA (adenine2503-C2)-methyltransferase [EC:2.1.1.192]	K06941	Specifically methylates position 2 of adenine 2503 in 23S rRNA and position 2 of adenine 37 in tRNAs. m2A2503 modification seems to play a crucial role in the proofreading step occurring at the peptidyl transferase center and thus would serve to optimize ribosomal fidelity (By similarity)	GO:0000049;GO:0000154;GO:0001510;GO:0002935;GO:0003674;GO:0003676;GO:0003723;GO:0003824;GO:0005488;GO:0005575;GO:0005622;GO:0005623;GO:0005737;GO:0006139;GO:0006364;GO:0006396;GO:0006399;GO:0006400;GO:0006725;GO:0006807;GO:0008033;GO:0008150;GO:0008152;GO:0008168;GO:0008169;GO:0008173;GO:0008175;GO:0008649;GO:0008757;GO:0009451;GO:0009987;GO:0010467;GO:0016070;GO:0016072;GO:0016426;GO:0016433;GO:…	Cytoplasmic		25C_agar;control_agar;lowpH_agar;oxidative_agar;42C_agar;control_25C;lowpH_25C;oxidative_25C;42C_25C
-6.6117	3.71515	5.63197	6.6117	5.80413	6.35317	+	+	Cluster 411	Cluster 55	7	14.5	76.478	0	26.448	1047700000	77	6.7566	0.00418557	AFT93459.1	competence protein [Francisella tularensis subsp. holarctica FSC200]	FTS_1866		2.67394	General function prediction only	R	COG0658;COG2333	ComEC	Predicted membrane metal-binding protein, Metal-dependent hydrolase, beta-lactamase superfamily II		comEC, competence protein ComEC	K02238	Competence protein		CytoplasmicMembrane		25C_agar;lowpH_agar;control_agar;oxidative_agar;42C_agar;lowpH_25C;control_25C;oxidative_25C;42C_25C
-5.73137	4.31115	5.73137	3.05225	4.82052	5.35469	+	+	Cluster 411	Cluster 55	8	59.7	16.876	0	47.798	651510000	59	5.735	0.0206193	AFT93015.1	hypothetical protein FTS_1272 [Francisella tularensis subsp. holarctica FSC200]	FTS_1272		34.0833											Unknown		25C_agar;oxidative_agar;control_agar;42C_agar;lowpH_agar;oxidative_25C;control_25C;42C_25C;lowpH_25C
-8.61931	5.55688	8.61931	7.33149	7.5328	7.90059	+	+	Cluster 411	Cluster 55	38	56.7	73.307	0	220.76	3544000000	403	8.58031	0.0334737	AFT92956.1	hypothetical protein FTS_1187 [Francisella tularensis subsp. holarctica FSC200]	FTS_1187		10.6923	Amino acid transport and metabolism	E							Transglutaminase-like superfamily		Cytoplasmic		25C_agar;oxidative_agar;42C_agar;control_agar;lowpH_agar;oxidative_25C;42C_25C;control_25C;lowpH_25C
11.322	-9.92829	-10.5583	-10.5844	-9.38733	-11.322	+	+	Cluster 425	Cluster -9	16	64	14.468	0	127.42	6876300000	335	10.9726	0.0484464	AFT92921.1;AFT92133.1	hypothetical protein FTS_1139 [Francisella tularensis subsp. holarctica FSC200];hypothetical protein FTS_0111 [Francisella tularensis subsp. holarctica FSC200]	FTS_1139;FTS_0111		3.71498											Unknown		25C_agar;control_agar;42C_agar;lowpH_agar;25C_oxidative;control_oxidative;42C_oxidative;lowpH_oxidative;42C_25C;lowpH_25C;42C_control;lowpH_control
6.95005	-7.25087	5.59208	7.25087	4.30734	-5.57548	+	+	Cluster -176	Cluster -32	10	49.3	16.013	0	122.74	4470900000	241	7.53413	0.0338447	AFT92565.1	hypothetical protein FTS_0685 [Francisella tularensis subsp. holarctica FSC200]	FTS_0685		4.46033											Unknown		oxidative_agar;control_agar;42C_agar;25C_agar;lowpH_agar;42C_oxidative;25C_oxidative;lowpH_oxidative;lowpH_control
5.39652	4.18996	5.96829	4.74252	-5.96829	4.5013	+	+	Cluster -9	Cluster 73	7	31.1	15.227	0	233.07	140010000000	1764	5.79309	0.0202959	AFT92078.1	hypothetical protein FTS_0037 [Francisella tularensis subsp. holarctica FSC200]	FTS_0037		2.8892											Unknown		oxidative_agar;25C_agar;42C_agar;control_agar;lowpH_agar;42C_oxidative;control_oxidative;lowpH_oxidative;control_25C;lowpH_25C;lowpH_42C
7.06444	5.63847	4.88486	6.26343	-6.36667	-7.06444	+	+	Cluster 161	Cluster 73	5	42.9	21.034	0	46.641	341590000	52	7.5671	0.00225	AFT92091.1	phosphoheptose isomerase [Francisella tularensis subsp. holarctica FSC200]	FTS_0060	gmhA	2.65099	Carbohydrate transport and metabolism	G	COG0279	GmhA	Phosphoheptose isomerase	Lipopolysaccharide biosynthesis;Metabolic pathways	gmhA, D-sedoheptulose 7-phosphate isomerase [EC:5.3.1.28]	K03271	Catalyzes the isomerization of sedoheptulose 7-phosphate in D-glycero-D-manno-heptose 7-phosphate (By similarity)	GO:0000271;GO:0003674;GO:0003824;GO:0005575;GO:0005622;GO:0005623;GO:0005737;GO:0005975;GO:0005976;GO:0006275;GO:0006629;GO:0008150;GO:0008152;GO:0008610;GO:0008653;GO:0008968;GO:0009058;GO:0009059;GO:0009103;GO:0009244;GO:0009311;GO:0009312;GO:0009889;GO:0009987;GO:0010556;GO:0016051;GO:0016853;GO:0016866;GO:0016868;GO:0019219;GO:0019222;GO:0030174;GO:0031323;GO:0031326;GO:0033692;GO:0034637;GO:…	Cytoplasmic		lowpH_agar;control_agar;42C_agar;25C_agar;oxidative_agar;control_lowpH;42C_lowpH;25C_lowpH;oxidative_lowpH
3.93793	4.51097	-4.51097	2.95772	-3.06846	-4.34479	+	+	Cluster 364	Cluster 73	5	36.2	22.456	0	31.343	271050000	54	5.27657	0.0273443	AFT92854.1	hypothetical protein FTS_1048 [Francisella tularensis subsp. holarctica FSC200]	FTS_1048		2.12789	Function unknown	S							cbs domain containing protein		Cytoplasmic		lowpH_agar;42C_agar;control_agar;25C_agar;oxidative_agar;control_lowpH;25C_lowpH;oxidative_lowpH;control_42C;25C_42C;oxidative_42C
5.64863	-3.49905	3.43937	3.4535	-4.49659	-5.64863	+	+	Cluster 409	Cluster 73	15	71	34.1	0	208.55	5384200000	336	5.43883	0.0471379	AFT92055.1	S49 family serine peptidase [Francisella tularensis subsp. holarctica FSC200]	FTS_0007		1.75898	Posttranslational modification, protein turnover, chaperones	O	COG0616	SppA	Periplasmic serine protease, ClpP class		sppA, protease IV [EC:3.4.21.-]	K04773	Signal peptide peptidase	GO:0005575;GO:0005623;GO:0005886;GO:0016020;GO:0044464;GO:0071944	CytoplasmicMembrane		oxidative_agar;lowpH_agar;42C_agar;25C_agar;control_agar;42C_oxidative;25C_oxidative;control_oxidative;control_lowpH
3.98473	-2.79627	1.85026	1.631	-2.63343	-3.98473	+	+	Cluster 409	Cluster 73	6	46.5	19.887	0	190.51	5419800000	216	3.69649	0.0240686	AFT92327.1	superoxide dismutase (Cu-Zn) precursor [Francisella tularensis subsp. holarctica FSC200]	FTS_0371	sodC	18.0014	Inorganic ion transport and metabolism	P	COG2032	SodC	Cu/Zn superoxide dismutase		SOD1, superoxide dismutase, Cu-Zn family [EC:1.15.1.1]	K04565	Destroys radicals which are normally produced within the cells and which are toxic to biological systems (By similarity)	GO:0000302;GO:0000303;GO:0003674;GO:0003824;GO:0004784;GO:0005488;GO:0005507;GO:0005575;GO:0005623;GO:0006801;GO:0006950;GO:0006979;GO:0008150;GO:0008152;GO:0008270;GO:0009987;GO:0010035;GO:0016209;GO:0016491;GO:0016721;GO:0019430;GO:0030288;GO:0030312;GO:0030313;GO:0031975;GO:0033554;GO:0034599;GO:0034614;GO:0042221;GO:0042597;GO:0043167;GO:0043169;GO:0044237;GO:0044462;GO:0044464;GO:0044699;GO:…	Periplasmic		oxidative_agar;25C_agar;42C_agar;lowpH_agar;control_agar
-3.6576	-3.44422	3.6576	3.61793	-3.35619	-2.4636	+	+	Cluster 428	Cluster 73	7	49	22.051	0	47.178	894000000	69	4.7742	0.0176045	AFT92268.1	hypothetical protein FTS_0283 [Francisella tularensis subsp. holarctica FSC200]	FTS_0283		4.05601											Unknown		25C_agar;42C_agar;oxidative_agar;control_agar;lowpH_agar;42C_25C;oxidative_25C;control_25C;lowpH_25C
-11.317	12.762	-10.8013	-12.762	12.135	12.6936	+	+	Cluster 412	Cluster -60	41	80.3	50.31	0	323.31	9565400000	671	13.8492	0	AFT92975.1	signal recognition particle GTPase [Francisella tularensis subsp. holarctica FSC200]	FTS_1213	ffh	2.36615	Intracellular trafficking, secretion, and vesicular transport	U	COG0541	Ffh	Signal recognition particle GTPase	Bacterial secretion system;Protein export;Quorum sensing	SRP54, signal recognition particle subunit SRP54 [EC:3.6.5.4]	K03106	Involved in targeting and insertion of nascent membrane proteins into the cytoplasmic membrane. Binds to the hydrophobic signal sequence of the ribosome-nascent chain (RNC) as it emerges from the ribosomes. The SRP-RNC complex is then targeted to the cytoplasmic membrane where it interacts with the SRP receptor FtsY. Interaction with FtsY leads to the transfer of the RNC complex to the Sec transl…	GO:0000166;GO:0001882;GO:0001883;GO:0003674;GO:0003824;GO:0003924;GO:0005488;GO:0005525;GO:0005575;GO:0005618;GO:0005622;GO:0005623;GO:0005737;GO:0005886;GO:0006139;GO:0006152;GO:0006163;GO:0006184;GO:0006195;GO:0006605;GO:0006612;GO:0006725;GO:0006753;GO:0006793;GO:0006796;GO:0006807;GO:0006810;GO:0006886;GO:0008104;GO:0008150;GO:0008152;GO:0009056;GO:0009116;GO:0009117;GO:0009119;GO:0009141;GO:…	CytoplasmicMembrane		25C_agar;lowpH_agar;42C_agar;oxidative_agar;control_agar;oxidative_25C;control_25C;oxidative_lowpH;control_lowpH;oxidative_42C;control_42C
-3.4754	6.60916	-4.50308	-6.60916	6.41493	4.61247	+	+	Cluster 403	Cluster 61	5	32.8	22.15	0	38.747	656170000	38	6.79882	0	AFT92725.1	ATP-dependent Clp protease proteolytic subunit [Francisella tularensis subsp. holarctica FSC200]	FTS_0883	clpP	9.85401	Posttranslational modification, protein turnover, chaperones	O	COG0740	ClpP	ATP-dependent protease ClpP, protease subunit		clpP, ATP-dependent Clp protease, protease subunit [EC:3.4.21.92]	K01358	Cleaves peptides in various proteins in a process that requires ATP hydrolysis. Has a chymotrypsin-like activity. Plays a major role in the degradation of misfolded proteins (By similarity)	GO:0003674;GO:0003824;GO:0005575;GO:0005618;GO:0005622;GO:0005623;GO:0005737;GO:0005829;GO:0005886;GO:0006508;GO:0006515;GO:0006950;GO:0008150;GO:0008152;GO:0008233;GO:0008236;GO:0009056;GO:0009057;GO:0009266;GO:0009408;GO:0009628;GO:0009987;GO:0016020;GO:0016787;GO:0017171;GO:0019538;GO:0030163;GO:0030312;GO:0040007;GO:0043170;GO:0044237;GO:0044238;GO:0044248;GO:0044257;GO:0044260;GO:0044265;GO:…	Cytoplasmic		lowpH_agar;25C_agar;oxidative_agar;control_agar;42C_agar;control_lowpH;42C_lowpH
-4.29922	6.24229	-5.94905	-6.24229	5.39582	3.80023	+	+	Cluster 403	Cluster 61	23	50.6	50.409	0	198.53	2047400000	213	6.79868	0.00111628	AFT93159.1	dGTP triphosphohydrolase [Francisella tularensis subsp. holarctica FSC200]	FTS_1470	dgt	13.9444	Nucleotide transport and metabolism	F	COG0232	Dgt	dGTP triphosphohydrolase	Purine metabolism	dgt, dGTPase [EC:3.1.5.1]	K01129	deoxyguanosinetriphosphate triphosphohydrolase-like protein	GO:0003674;GO:0003824;GO:0006139;GO:0006725;GO:0006807;GO:0008150;GO:0008152;GO:0008832;GO:0009987;GO:0015949;GO:0016787;GO:0016788;GO:0016793;GO:0034641;GO:0042578;GO:0044237;GO:0044238;GO:0044281;GO:0044710;GO:0046483;GO:0055086;GO:0071704;GO:1901360	Cytoplasmic		oxidative_agar;25C_agar;control_agar;lowpH_agar;42C_agar;42C_oxidative
-4.64172	3.08099	-3.22568	-4.99297	2.97398	4.99297	+	+	Cluster 403	Cluster 61	9	44.4	28.202	0	12.453	213170000	37	5.18082	0.0315853	AFT92166.1	shikimate 5-dehydrogenase [Francisella tularensis subsp. holarctica FSC200]	FTS_0169	aroE	1.7332	Amino acid transport and metabolism	E	COG0169	AroE	Shikimate 5-dehydrogenase	Biosynthesis of amino acids;Biosynthesis of antibiotics;Biosynthesis of secondary metabolites;Metabolic pathways;Phenylalanine, tyrosine and tryptophan biosynthesis	aroE, shikimate dehydrogenase [EC:1.1.1.25]	K00014	shikimate dehydrogenase		Cytoplasmic		25C_agar;lowpH_agar;oxidative_agar;control_agar;42C_agar;lowpH_25C;oxidative_25C;control_25C;42C_25C;42C_lowpH;42C_oxidative
-6.97153	5.2957	-4.55671	-7.52048	5.57599	7.52048	+	+	Cluster 403	Cluster 61	15	49.4	40.683	0	116.19	1149600000	105	7.65375	0	AFT92500.1	sugar transamine/perosamine synthetase [Francisella tularensis subsp. holarctica FSC200]	FTS_0600	wbtI	2.9707	Cell wall/membrane/envelope biogenesis	M							DegT DnrJ EryC1 StrS	GO:0000271;GO:0003674;GO:0003824;GO:0005975;GO:0005976;GO:0008150;GO:0008152;GO:0009058;GO:0009059;GO:0016051;GO:0043170;GO:0044238;GO:0044723;GO:0071704;GO:1901576	Cytoplasmic		lowpH_control;42C_control;25C_control;oxidative_control;agar_control;oxidative_lowpH;agar_lowpH;oxidative_42C;agar_42C;agar_25C;agar_oxidative
-5.51865	6.56367	-5.26604	-6.56367	4.43278	5.33077	+	+	Cluster 403	Cluster 61	4	29.6	19.961	0	15.946	116110000	10	6.85745	0.00331034	AFT93189.1	glutamine amidotransferase subunit PdxT [Francisella tularensis subsp. holarctica FSC200]	FTS_1509		2.47717	Coenzyme transport and metabolism	H	COG0311	PdxT	Glutamine amidotransferase PdxT (pyridoxal biosynthesis)	Vitamin B6 metabolism	pdxT, 5'-phosphate synthase pdxT subunit [EC:4.3.3.6]	K08681	Involved in the hydrolysis of glutamine to glutamate and ammonia. Channels an ammonia molecule to PdxS (By similarity)	GO:0003674;GO:0003824;GO:0006732;GO:0006793;GO:0006796;GO:0008150;GO:0008152;GO:0009058;GO:0009108;GO:0009987;GO:0016829;GO:0016840;GO:0016843;GO:0019637;GO:0040007;GO:0042822;GO:0042823;GO:0044237;GO:0044249;GO:0051186;GO:0051188;GO:0071704;GO:0090407;GO:1901576	Unknown		oxidative_lowpH;25C_lowpH;agar_lowpH;25C_control;agar_control;25C_42C;agar_42C;agar_oxidative;agar_25C
-6.37361	6.37361	5.5715	-4.19058	6.28033	6.15509	+	+	Cluster 401	Cluster 52	10	49	29.331	0	84.419	750770000	80	6.97818	0.0153	AFT92633.1	methyltransferase [Francisella tularensis subsp. holarctica FSC200]	FTS_0765		OMV	Function unknown	S							Methyl-transferase		Cytoplasmic		oxidative_lowpH;25C_lowpH;agar_lowpH;oxidative_control;25C_control;agar_control;25C_42C;agar_42C;25C_oxidative;agar_oxidative;agar_25C
-5.05126	3.25179	2.66018	-4.10371	4.24839	5.05126	+	+	Cluster 401	Cluster 52	12	40.1	36.677	0	41.105	447740000	71	5.25291	0.002304	AFT92319.1	NAD(P)H-dependent glycerol-3-phosphate dehydrogenase [Francisella tularensis subsp. holarctica FSC200]	FTS_0363	gpsA	OMV	Energy production and conversion	C	COG0240	GpsA	Glycerol-3-phosphate dehydrogenase	Biosynthesis of secondary metabolites;Glycerophospholipid metabolism	gpsA, glycerol-3-phosphate dehydrogenase (NAD(P)) [EC:1.1.1.94]	K00057	NAD(P)H-dependent glycerol-3-phosphate dehydrogenase	GO:0003674;GO:0003824;GO:0004367;GO:0005575;GO:0005622;GO:0005623;GO:0005737;GO:0006072;GO:0006629;GO:0006644;GO:0006650;GO:0006793;GO:0006796;GO:0008150;GO:0008152;GO:0008610;GO:0008654;GO:0009058;GO:0009987;GO:0016491;GO:0016614;GO:0016616;GO:0019637;GO:0044237;GO:0044238;GO:0044249;GO:0044255;GO:0044424;GO:0044464;GO:0044710;GO:0045017;GO:0046474;GO:0046486;GO:0047952;GO:0052646;GO:0055114;GO:…	Cytoplasmic		control_25C;oxidative_25C;42C_25C;agar_25C;lowpH_25C;oxidative_control;42C_control;agar_control;lowpH_control;agar_oxidative;lowpH_oxidative;agar_42C;lowpH_42C
7.20141	6.18796	-6.77732	-6.7969	-5.49608	-7.20141	+	+	Cluster 435	Cluster -63	5	56.8	15.059	0	160.94	2602600000	220	7.96672	0.0163275	AFT93007.1	hypothetical protein FTS_1258 [Francisella tularensis subsp. holarctica FSC200]	FTS_1258		1.83277											Unknown		42C_control;25C_control;lowpH_control;agar_control;25C_oxidative;lowpH_oxidative;agar_oxidative;lowpH_42C;agar_42C;agar_25C;agar_lowpH
-5.38661	8.38473	-8.38473	-7.60757	5.7221	-7.50781	+	+	Cluster 395	Cluster -68	24	63.9	51.988	0	211.61	1774300000	190	8.45954	0.00123077	AFT93136.1	cytosol aminopeptidase [Francisella tularensis subsp. holarctica FSC200]	FTS_1445	pepA	2.15694	Amino acid transport and metabolism	E	COG0260	PepB	Leucyl aminopeptidase	Glutathione metabolism;Metabolic pathways	CARP, leucyl aminopeptidase [EC:3.4.11.1]	K01255	Presumably involved in the processing and regular turnover of intracellular proteins. Catalyzes the removal of unsubstituted N-terminal amino acids from various peptides (By similarity)	GO:0003674;GO:0003824;GO:0005575;GO:0005622;GO:0005623;GO:0005737;GO:0006508;GO:0008150;GO:0008152;GO:0008233;GO:0008235;GO:0008237;GO:0008238;GO:0016787;GO:0019538;GO:0043170;GO:0044238;GO:0044424;GO:0044464;GO:0070011;GO:0071704	Cytoplasmic		42C_oxidative;25C_oxidative;agar_oxidative;lowpH_oxidative;42C_control;25C_control;agar_control;lowpH_control;25C_42C;agar_42C;lowpH_42C;agar_25C;lowpH_25C;lowpH_agar
-5.98982	5.98982	-5.682	-4.30404	-3.70967	4.45113	+	+	Cluster 423	Cluster -43	17	70.7	27.864	0	91.063	1334400000	156	6.25476	0.00157895	AFT92675.1	rhodanese-like family protein [Francisella tularensis subsp. holarctica FSC200]	FTS_0824		35.4754	Inorganic ion transport and metabolism	P							Rhodanese domain protein		Unknown		25C_oxidative;control_oxidative;lowpH_oxidative;agar_oxidative;42C_oxidative;42C_25C
-2.24277	-3.34923	4.7187	-4.7187	3.72692	3.47985	+	+	Cluster -249	Cluster 49	13	54.2	34.076	0	90.549	1193800000	162	4.79133	0.00947126	AFT92792.1	malate dehydrogenase [Francisella tularensis subsp. holarctica FSC200]	FTS_0967	mdh	2.90369	Energy production and conversion	C	COG0039	Mdh	Malate/lactate dehydrogenase	Biosynthesis of antibiotics;Biosynthesis of secondary metabolites;Carbon metabolism;Citrate cycle (TCA cycle);Cysteine and methionine metabolism;Glyoxylate and dicarboxylate metabolism;Metabolic pathways;Methane metabolism;Microbial metabolism in diverse environments;Pyruvate metabolism	mdh, malate dehydrogenase [EC:1.1.1.37]	K00024	Catalyzes the reversible oxidation of malate to oxaloacetate (By similarity)	GO:0003674;GO:0003824;GO:0006091;GO:0006099;GO:0008150;GO:0008152;GO:0009060;GO:0009987;GO:0015980;GO:0016491;GO:0016614;GO:0016615;GO:0016616;GO:0030060;GO:0044237;GO:0044238;GO:0044710;GO:0045333;GO:0055114	Cytoplasmic		42C_oxidative;25C_oxidative;lowpH_oxidative;agar_oxidative;42C_control;25C_control;lowpH_control;agar_control;25C_42C;lowpH_42C;agar_42C;agar_25C;agar_lowpH
-4.28709	-3.91882	4.28709	2.74332	2.22111	3.16731	+	+	Cluster 327	Cluster 56	15	60.7	26.809	0	127.3	2609400000	239	4.64204	0.0350273	AFT93482.1	peptide methionine sulfoxide reductase [Francisella tularensis subsp. holarctica FSC200]	FTS_1906	msrA	13.4428	Posttranslational modification, protein turnover, chaperones	O	COG0225	MsrA	Peptide methionine sulfoxide reductase MsrA		msrA, peptide-methionine (S)-S-oxide reductase [EC:1.8.4.11]	K07304	Has an important function as a repair enzyme for proteins that have been inactivated by oxidation. Catalyzes the reversible oxidation-reduction of methionine sulfoxide in proteins to methionine (By similarity)		Unknown		42C_oxidative;lowpH_oxidative;agar_oxidative;25C_oxidative;42C_control;lowpH_control;agar_control;25C_control;agar_42C;25C_42C;25C_lowpH;25C_agar
-4.69364	-3.29034	4.69364	2.97243	3.4674	3.5423	+	+	Cluster 327	Cluster 56	5	18.7	22.686	0	26.247	465010000	38	4.71217	0.0146968	AFT93261.1	hypothetical protein FTS_1607 [Francisella tularensis subsp. holarctica FSC200]	FTS_1607		2.17569											Unknown		42C_control;25C_control;lowpH_control;agar_control;42C_oxidative;25C_oxidative;lowpH_oxidative;agar_oxidative;agar_42C;agar_25C
-4.02125	-2.61811	4.02125	2.32801	2.82861	2.78008	+	+	Cluster 327	Cluster 56	2	32.1	15.291	0	4.8991	151410000	21	3.94554	0.0142801	AFT92281.1	hypothetical protein FTS_0297 [Francisella tularensis subsp. holarctica FSC200]	FTS_0297		OMV											Unknown		control_42C;oxidative_42C;lowpH_42C;agar_42C;25C_42C;lowpH_control;agar_control;25C_control;lowpH_oxidative;agar_oxidative;25C_oxidative;agar_lowpH;25C_lowpH
-4.77536	-2.46034	4.77536	3.36596	2.77147	2.9345	+	+	Cluster 327	Cluster 56	10	52.3	13.069	0	146.54	8519800000	370	4.37542	0.0208283	AFT92667.1	hypothetical protein FTS_0815 [Francisella tularensis subsp. holarctica FSC200]	FTS_0815		23.4873											Unknown		agar_control;42C_control;oxidative_control;25C_control;lowpH_control
-3.68016	-2.91672	2.63649	2.73731	3.68016	3.55279	+	+	Cluster 327	Cluster 56	12	70.7	18.782	0	311.99	26830000000	733	4.30917	0.0281028	AFT92453.1	outer membrane protein OmpH [Francisella tularensis subsp. holarctica FSC200]	FTS_0538	ompH	254.349	Cell wall/membrane/envelope biogenesis;Posttranslational modification, protein turnover, chaperones	M;O	COG2825	HlpA	Periplasmic chaperone for outer membrane proteins, Skp family		hlpA, outer membrane protein	K06142	Molecular chaperone that interacts specifically with outer membrane proteins, thus maintaining the solubility of early folding intermediates during passage through the periplasm (By similarity)	GO:0001530;GO:0003674;GO:0005488;GO:0005575;GO:0005622;GO:0005623;GO:0005737;GO:0005829;GO:0006457;GO:0006458;GO:0006810;GO:0006886;GO:0008104;GO:0008150;GO:0008152;GO:0008289;GO:0009279;GO:0009987;GO:0010468;GO:0010608;GO:0015031;GO:0016020;GO:0016043;GO:0016044;GO:0019222;GO:0019538;GO:0019867;GO:0022607;GO:0030288;GO:0030312;GO:0030313;GO:0031647;GO:0031975;GO:0032978;GO:0033036;GO:0034613;GO:…	Unknown		oxidative_control;lowpH_control;42C_control;25C_control;agar_control;lowpH_oxidative;42C_oxidative;25C_oxidative;agar_oxidative;agar_lowpH
-5.00022	-4.11231	5.00022	4.25848	4.69667	4.61842	+	+	Cluster 327	Cluster 56	35	53.3	83.123	0	323.31	19595000000	858	5.85263	0.0223623	AFT93168.1	chitinase family 18 protein [Francisella tularensis subsp. holarctica FSC200]	FTS_1485		69.7935	Carbohydrate transport and metabolism	G	COG3325	ChiA	Chitinase, GH18 family	Amino sugar and nucleotide sugar metabolism;Metabolic pathways	E3.2.1.14, chitinase [EC:3.2.1.14]	K01183	chitinase		Unknown		42C_control;lowpH_control;oxidative_control;agar_control;25C_control;25C_42C;25C_lowpH;25C_oxidative
-4.76827	-3.46516	4.76827	3.1966	4.54901	4.60661	+	+	Cluster 327	Cluster 56	11	37.8	38.873	0	46.058	715420000	81	5.43103	0.0149333	AFT93387.1	uroporphyrinogen decarboxylase [Francisella tularensis subsp. holarctica FSC200]	FTS_1769	hemE	6.67258	Coenzyme transport and metabolism	H	COG0407	HemE	Uroporphyrinogen-III decarboxylase	Biosynthesis of secondary metabolites;Metabolic pathways;Porphyrin and chlorophyll metabolism	hemE, uroporphyrinogen decarboxylase [EC:4.1.1.37]	K01599	Catalyzes the decarboxylation of four acetate groups of uroporphyrinogen-III to yield coproporphyrinogen-III (By similarity)	GO:0003674;GO:0003824;GO:0004853;GO:0005575;GO:0005622;GO:0005623;GO:0005737;GO:0006082;GO:0006520;GO:0006536;GO:0006725;GO:0006778;GO:0006779;GO:0006780;GO:0006782;GO:0006783;GO:0006807;GO:0008150;GO:0008152;GO:0009058;GO:0009064;GO:0009987;GO:0016053;GO:0016829;GO:0016830;GO:0016831;GO:0018130;GO:0019353;GO:0019438;GO:0019752;GO:0033013;GO:0033014;GO:0033526;GO:0034641;GO:0042168;GO:0042440;GO:…	Cytoplasmic		25C_control;agar_control;lowpH_control;25C_42C;agar_42C;lowpH_42C;25C_oxidative;agar_oxidative;lowpH_oxidative
-4.56903	-4.09376	4.33059	4.56903	3.74709	3.49902	+	+	Cluster 327	Cluster 56	12	22.2	78.976	0	62.328	1153400000	125	5.43227	0.0256117	AFT92110.1	chitinase [Francisella tularensis subsp. holarctica FSC200]	FTS_0083	chiB	OMV	Carbohydrate transport and metabolism	G	COG3325	ChiA	Chitinase, GH18 family	Amino sugar and nucleotide sugar metabolism;Metabolic pathways	E3.2.1.14, chitinase [EC:3.2.1.14]	K01183	chitinase		Periplasmic		oxidative_42C;agar_42C;25C_42C;lowpH_42C;oxidative_control;agar_control;25C_control;lowpH_control;lowpH_oxidative;lowpH_agar;lowpH_25C
-4.66085	-3.0792	4.66085	4.01685	3.80218	4.29497	+	+	Cluster 327	Cluster 56	30	49	98.609	0	323.31	10902000000	553	5.09359	0.0192604	AFT93224.1	organic solvent tolerance protein, OstA [Francisella tularensis subsp. holarctica FSC200]	FTS_1557	ostA1	5.49246	Cell wall/membrane/envelope biogenesis	M	COG1452	LptD	LPS assembly outer membrane protein LptD (organic solvent tolerance protein OstA)		lptD, LPS-assembly protein	K04744	involved in the assembly of LPS in the outer leaflet of the outer membrane. Determines N-hexane tolerance and is involved in outer membrane permeability. Essential for envelope biogenesis (By similarity)	GO:0005575;GO:0005623;GO:0006810;GO:0006869;GO:0008150;GO:0009279;GO:0009636;GO:0009987;GO:0010033;GO:0010876;GO:0015920;GO:0016020;GO:0016043;GO:0016044;GO:0019867;GO:0022607;GO:0030312;GO:0030313;GO:0031975;GO:0033036;GO:0042221;GO:0043163;GO:0043165;GO:0044085;GO:0044091;GO:0044462;GO:0044464;GO:0044699;GO:0044763;GO:0044765;GO:0045229;GO:0050896;GO:0051179;GO:0051234;GO:0061024;GO:0071702;GO:…	OuterMembrane		lowpH_42C;agar_42C;25C_42C;lowpH_control;agar_control;25C_control;agar_oxidative;25C_oxidative
-3.87942	1.93677	3.87942	3.37321	2.00509	2.18186	+	+	Cluster 404	Cluster 56	3	35.4	14.728	0	74.935	2027200000	108	3.64896	0.0173894	AFT92612.1	hypothetical protein FTS_0738 [Francisella tularensis subsp. holarctica FSC200]	FTS_0738		OMV											Unknown		lowpH_control;25C_control;agar_control;25C_oxidative;agar_oxidative;25C_42C;agar_42C;agar_lowpH
-2.6904	0	2.81187	-2.81187	1.95015	2.40723	+	+	Cluster 390	Cluster 49	10	29.9	52.395	0	20.154	141490000	54	3.47885	0.00929508	AFT93411.1	aspartyl/glutamyl-tRNA amidotransferase subunit A [Francisella tularensis subsp. holarctica FSC200]	FTS_1797	gatA	OMV	Translation, ribosomal structure and biogenesis	J	COG0154	GatA	Asp-tRNAAsn/Glu-tRNAGln amidotransferase A subunit or related amidase	Aminoacyl-tRNA biosynthesis;Metabolic pathways	gatA, aspartyl-tRNA(Asn)/glutamyl-tRNA(Gln) amidotransferase subunit A [EC:6.3.5.6 6.3.5.7]	K02433	Allows the formation of correctly charged Gln-tRNA(Gln) through the transamidation of misacylated Glu-tRNA(Gln) in organisms which lack glutaminyl-tRNA synthetase. The reaction takes place in the presence of glutamine and ATP through an activated gamma-phospho-Glu-tRNA(Gln) (By similarity)	GO:0003674;GO:0003824;GO:0004040;GO:0008150;GO:0008152;GO:0016787;GO:0016810;GO:0016811;GO:0040007	Cytoplasmic		oxidative_control;lowpH_control;agar_control;25C_control;lowpH_42C;agar_42C;25C_42C;25C_oxidative
3.57946	5.74868	4.76178	-5.74868	4.31462	5.43917	+	+	Cluster 387	Cluster 37	11	35	47.064	0	57.823	445560000	68	5.70989	0.00361364	AFT93004.1	glutamate-1-semialdehyde aminotransferase [Francisella tularensis subsp. holarctica FSC200]	FTS_1255	hemL	2.321	Coenzyme transport and metabolism	H	COG0001	HemL	Glutamate-1-semialdehyde aminotransferase	Biosynthesis of secondary metabolites;Metabolic pathways;Microbial metabolism in diverse environments;Porphyrin and chlorophyll metabolism	hemL, glutamate-1-semialdehyde 2,1-aminomutase [EC:5.4.3.8]	K01845	Glutamate-1-semialdehyde aminotransferase	GO:0003674;GO:0003824;GO:0005575;GO:0005622;GO:0005623;GO:0005737;GO:0005886;GO:0006725;GO:0006778;GO:0006779;GO:0006807;GO:0008150;GO:0008152;GO:0009058;GO:0009987;GO:0016020;GO:0016853;GO:0016866;GO:0016869;GO:0018130;GO:0019438;GO:0033013;GO:0033014;GO:0034641;GO:0040007;GO:0044237;GO:0044249;GO:0044271;GO:0044424;GO:0044464;GO:0046483;GO:0051186;GO:0051188;GO:0071704;GO:0071944;GO:1901360;GO:…	Cytoplasmic		lowpH_25C;agar_25C;lowpH_control;agar_control;lowpH_oxidative;agar_oxidative;lowpH_42C;agar_42C
4.45438	3.42091	5.43098	-5.43098	3.23954	3.9691	+	+	Cluster 387	Cluster 37	12	57.5	26.357	0	79.719	3261300000	124	5.088	0.00162712	AFT92896.1	3-oxoacyl-(acyl-carrier-protein) reductase [Francisella tularensis subsp. holarctica FSC200]	FTS_1110	fabG	4.86232	Lipid transport and metabolism;Secondary metabolites biosynthesis, transport and catabolism;General function prediction only	I;Q;R	COG1028	FabG	NAD(P)-dependent dehydrogenase, short-chain alcohol dehydrogenase family	Biosynthesis of antibiotics;Biosynthesis of unsaturated fatty acids;Biotin metabolism;Fatty acid metabolism;Galactose metabolism;Metabolic pathways	fabG, 3-oxoacyl-[acyl-carrier protein] reductase [EC:1.1.1.100]	K00059	reductase	GO:0000166;GO:0003674;GO:0003824;GO:0004312;GO:0004316;GO:0005488;GO:0005575;GO:0005623;GO:0005886;GO:0006082;GO:0006461;GO:0006629;GO:0006631;GO:0006633;GO:0006766;GO:0006767;GO:0006768;GO:0006790;GO:0006807;GO:0008150;GO:0008152;GO:0008610;GO:0009058;GO:0009059;GO:0009102;GO:0009110;GO:0009273;GO:0009987;GO:0016020;GO:0016043;GO:0016053;GO:0016491;GO:0016614;GO:0016616;GO:0016740;GO:0016746;GO:…	Cytoplasmic		25C_control;42C_control;lowpH_control;agar_control;42C_oxidative;lowpH_oxidative;agar_oxidative;agar_25C;agar_42C;agar_lowpH
2.92497	3.22136	1.61072	1.46063	-3.22136	-1.38204	+	+	Cluster 389	Cluster 73	12	51.4	35.413	0	205.04	998790000	109	3.17247	0.0207392	AFT92903.1	glyceraldehyde-3-phosphate dehydrogenase/erythrose-4-phosphate dehydrogenase [Francisella tularensis subsp. holarctica FSC200]	FTS_1117	gapA	2.82063	Carbohydrate transport and metabolism	G	COG0057	GapA	Glyceraldehyde-3-phosphate dehydrogenase/erythrose-4-phosphate dehydrogenase	Biosynthesis of amino acids;Biosynthesis of antibiotics;Biosynthesis of secondary metabolites;Carbon metabolism;Glycolysis / Gluconeogenesis;Metabolic pathways;Microbial metabolism in diverse environments	GAPDH, glyceraldehyde 3-phosphate dehydrogenase [EC:1.2.1.12]	K00134	Catalyzes the NAD-dependent conversion of D-erythrose 4- phosphate to 4-phosphoerythronate (By similarity)	GO:0005575;GO:0005622;GO:0005623;GO:0005737;GO:0044424;GO:0044464	Cytoplasmic		lowpH_control;42C_control;agar_control;agar_25C;agar_oxidative;agar_lowpH
2.05751	-1.58897	-2.63385	-3.85848	3.64956	3.85848	+	+	Cluster -113	Cluster 63	41	53.9	87.25	0	267.15	2593200000	294	4.12101	0.0027234	AFT92362.1	DNA topoisomerase I [Francisella tularensis subsp. holarctica FSC200]	FTS_0417	topA	26.7345	Replication, recombination and repair;Function unknown	L;S	COG0550;COG0551;COG1754	TopA;YrdD;COG1754	DNA topoisomerase IA, ssDNA-binding Zn-finger and Zn-ribbon domains of topoisomerase 1, Uncharacterized C-terminal domain of topoisomerase IA		topA, DNA topoisomerase I [EC:5.99.1.2]	K03168	Releases the supercoiling and torsional tension of DNA, which is introduced during the DNA replication and transcription, by transiently cleaving and rejoining one strand of the DNA duplex. Introduces a single-strand break via transesterification at a target site in duplex DNA. The scissile phosphodiester is attacked by the catalytic tyrosine of the enzyme, resulting in the formation of a DNA-(5'…	GO:0000287;GO:0003674;GO:0003824;GO:0003916;GO:0003917;GO:0005488;GO:0005575;GO:0005618;GO:0005622;GO:0005623;GO:0005737;GO:0005829;GO:0005886;GO:0006139;GO:0006259;GO:0006265;GO:0006725;GO:0006807;GO:0008150;GO:0008152;GO:0009987;GO:0016020;GO:0016853;GO:0019219;GO:0019222;GO:0022616;GO:0030312;GO:0031323;GO:0032069;GO:0032074;GO:0034641;GO:0040007;GO:0043086;GO:0043167;GO:0043169;GO:0043170;GO:…	Cytoplasmic		lowpH_agar;42C_agar;lowpH_25C;42C_25C;lowpH_oxidative;42C_oxidative;lowpH_control;42C_control
-2.76584	4.4347	-2.96639	-4.4347	4.34614	-2.07369	+	+	Cluster 357	Cluster 61	6	8.6	62.331	0	80.5	1027500000	112	4.8399	0.0238231	AFT93435.1	potassium-transporting ATPase subunit A [Francisella tularensis subsp. holarctica FSC200]	FTS_1832	kdpA	1.81561	Inorganic ion transport and metabolism	P	COG2060	KdpA	K+-transporting ATPase, A chain	Two-component system	kdpA, K+transporting ATPase ATPase A chain [EC:3.6.3.12]	K01546	One of the components of the high-affinity ATP-driven potassium transport (or KDP) system, which catalyzes the hydrolysis of ATP coupled with the exchange of hydrogen and potassium ions (By similarity)	GO:0003674;GO:0003824;GO:0005215;GO:0005488;GO:0005575;GO:0005618;GO:0005623;GO:0005886;GO:0006139;GO:0006152;GO:0006163;GO:0006195;GO:0006200;GO:0006725;GO:0006753;GO:0006793;GO:0006796;GO:0006807;GO:0006810;GO:0006811;GO:0006812;GO:0006813;GO:0008150;GO:0008152;GO:0008324;GO:0008556;GO:0009056;GO:0009116;GO:0009117;GO:0009119;GO:0009123;GO:0009125;GO:0009126;GO:0009128;GO:0009141;GO:0009143;GO:…	CytoplasmicMembrane		control_agar;lowpH_agar;lowpH_oxidative;lowpH_25C;lowpH_42C;lowpH_control
5.36128	7.15821	-7.15821	4.67543	5.99617	4.87361	+	+	Cluster 380	Cluster 46	15	57.4	30.959	0	62.042	1084200000	161	6.74543	0.0192312	AFT92212.1	elongation factor Ts [Francisella tularensis subsp. holarctica FSC200]	FTS_0222	tsf	2.11386	Translation, ribosomal structure and biogenesis	J	COG0264	Tsf	Translation elongation factor EF-Ts		tsf, elongation factor Ts	K02357	Associates with the EF-Tu.GDP complex and induces the exchange of GDP to GTP. It remains bound to the aminoacyl-tRNA.EF- Tu.GTP complex up to the GTP hydrolysis stage on the ribosome (By similarity)	GO:0003674;GO:0003676;GO:0003723;GO:0003746;GO:0005488;GO:0005575;GO:0005618;GO:0005622;GO:0005623;GO:0005737;GO:0005829;GO:0005886;GO:0006412;GO:0006414;GO:0008135;GO:0008150;GO:0008152;GO:0008270;GO:0009058;GO:0009059;GO:0009987;GO:0010467;GO:0016020;GO:0019538;GO:0030312;GO:0034645;GO:0040007;GO:0043167;GO:0043169;GO:0043170;GO:0044237;GO:0044238;GO:0044249;GO:0044260;GO:0044267;GO:0044424;GO:…	Cytoplasmic		42C_lowpH;oxidative_lowpH;agar_lowpH;control_lowpH;25C_lowpH;agar_42C;control_42C;25C_42C;control_oxidative;25C_oxidative;25C_agar
3.94057	5.38526	-5.38526	3.42743	2.58415	4.46549	+	+	Cluster 380	Cluster 46	21	53.8	52.245	0	138.44	2002700000	219	5.10645	0.0012963	AFT92623.1	exodeoxyribonuclease VII large subunit [Francisella tularensis subsp. holarctica FSC200]	FTS_0754	xseA	24.5354	Replication, recombination and repair	L	COG1570	XseA	Exonuclease VII, large subunit	Mismatch repair	xseA, exodeoxyribonuclease VII large subunit [EC:3.1.11.6]	K03601	Bidirectionally degrades single-stranded DNA into large acid-insoluble oligonucleotides, which are then degraded further into small acid-soluble oligonucleotides (By similarity)	GO:0005575;GO:0005618;GO:0005622;GO:0005623;GO:0005737;GO:0030312;GO:0044424;GO:0044464;GO:0071944	Cytoplasmic		oxidative_42C;agar_42C;control_42C;25C_42C;oxidative_lowpH;agar_lowpH;control_lowpH;25C_lowpH;control_oxidative;25C_oxidative;control_agar;25C_agar;25C_control
4.4581	5.70196	-5.70196	3.63579	3.08361	4.50505	+	+	Cluster 380	Cluster 46	4	63.6	7.6627	0	40.77	2855000000	92	5.36839	0.00113208	AFT92624.1	hypothetical protein FTS_0755 [Francisella tularensis subsp. holarctica FSC200]	FTS_0755		38.437	Replication, recombination and repair	L	COG1722	XseB	Exonuclease VII small subunit	Mismatch repair	xseB, exodeoxyribonuclease VII small subunit [EC:3.1.11.6]	K03602			Unknown		agar_lowpH;42C_lowpH;oxidative_lowpH;control_lowpH;25C_lowpH;42C_agar;oxidative_agar;control_agar;25C_agar;oxidative_42C;control_42C;25C_42C;control_oxidative;25C_oxidative
3.71565	6.03952	-6.03952	-5.05484	-3.44112	3.39113	+	+	Cluster 406	Cluster 63	13	47.3	43.092	0	50.768	314250000	75	5.81254	0.00107216	AFT92660.1	P-pantothenate cysteine ligase/P-pantothenoylcysteine decarboxylase [Francisella tularensis subsp. holarctica FSC200]	FTS_0801	dfp	1.98192	Coenzyme transport and metabolism	H	COG0452	CoaBC	Phosphopantothenoylcysteine synthetase/decarboxylase	Metabolic pathways;Pantothenate and CoA biosynthesis	coaBC, phosphopantothenoylcysteine decarboxylase / phosphopantothenate--cysteine ligase [EC:4.1.1.36 6.3.2.5]	K13038	Phosphopantothenoylcysteine decarboxylase	GO:0000166;GO:0003674;GO:0003824;GO:0004632;GO:0004633;GO:0005488;GO:0006139;GO:0006163;GO:0006164;GO:0006259;GO:0006725;GO:0006732;GO:0006753;GO:0006793;GO:0006796;GO:0006807;GO:0008150;GO:0008152;GO:0009058;GO:0009108;GO:0009116;GO:0009117;GO:0009119;GO:0009150;GO:0009152;GO:0009163;GO:0009165;GO:0009259;GO:0009260;GO:0009987;GO:0010181;GO:0015936;GO:0015937;GO:0016829;GO:0016830;GO:0016831;GO:…	Cytoplasmic		42C_agar;oxidative_agar;25C_agar;control_agar;42C_lowpH;oxidative_lowpH;25C_lowpH;control_lowpH;oxidative_42C;25C_42C;control_42C;control_oxidative
1.72199	3.57912	-2.6838	-3.95558	3.95558	3.71084	+	+	Cluster 407	Cluster 63	10	42.2	32.769	0	149.06	1114000000	100	4.46764	0.00104348	AFT92079.1	LysR family transcriptional regulator [Francisella tularensis subsp. holarctica FSC200]	FTS_0038	lysR	2.57971	Transcription	K							LysR family transcriptional regulator		Cytoplasmic		oxidative_agar;control_agar;25C_agar;oxidative_lowpH;control_lowpH;25C_lowpH;oxidative_42C;control_42C;25C_42C;25C_oxidative;25C_control
5.9911	4.47978	-5.51707	-6.83984	6.83984	6.15947	+	+	Cluster 407	Cluster 63	42	76.3	67.459	0	323.31	11665000000	612	7.23525	0	AFT92713.1	X-prolyl aminopeptidase 2 [Francisella tularensis subsp. holarctica FSC200]	FTS_0868		6.07993	Amino acid transport and metabolism	E	COG0006	PepP	Xaa-Pro aminopeptidase		pepP, Xaa-Pro aminopeptidase [EC:3.4.11.9]	K01262	aminopeptidase	GO:0006508;GO:0008150;GO:0008152;GO:0019538;GO:0043170;GO:0044238;GO:0071704	Cytoplasmic		42C_agar;oxidative_agar;25C_agar;control_agar;oxidative_lowpH;25C_lowpH;control_lowpH;oxidative_42C;25C_42C;control_42C;control_oxidative
6.40703	6.45327	-4.47515	-6.45327	4.5503	3.88705	+	+	Cluster 407	Cluster 63	21	64.6	39.527	0	323.31	89383000000	1807	6.72593	0.0424459	AFT92864.1	protein-disulfide isomerase [Francisella tularensis subsp. holarctica FSC200]	FTS_1067		4.09245	Posttranslational modification, protein turnover, chaperones	O							DSBA-like thioredoxin domain	GO:0005575;GO:0005623;GO:0009279;GO:0016020;GO:0019867;GO:0030312;GO:0030313;GO:0031975;GO:0044462;GO:0044464;GO:0071944	Unknown		42C_lowpH;agar_lowpH;control_lowpH;oxidative_lowpH;25C_lowpH;control_42C;oxidative_42C;25C_42C;oxidative_agar;25C_agar;oxidative_control;25C_control
5.67501	6.35169	-5.36652	-6.35169	4.7145	3.39439	+	+	Cluster 407	Cluster 63	35	90.2	49.864	0	323.31	27188000000	1295	6.69046	0.00870996	AFT93370.1	F0F1 ATP synthase subunit beta [Francisella tularensis subsp. holarctica FSC200]	FTS_1751	atpD	1.68024	Energy production and conversion	C	COG0055	AtpD	FoF1-type ATP synthase, beta subunit	Metabolic pathways;Oxidative phosphorylation	ATPF1B, F-type H+transporting ATPase subunit beta [EC:3.6.3.14]	K02112	Produces ATP from ADP in the presence of a proton gradient across the membrane. The catalytic sites are hosted primarily by the beta subunits (By similarity)	GO:0003674;GO:0003824;GO:0005215;GO:0005575;GO:0005576;GO:0005618;GO:0005622;GO:0005623;GO:0005737;GO:0005829;GO:0005886;GO:0006139;GO:0006152;GO:0006163;GO:0006164;GO:0006195;GO:0006200;GO:0006725;GO:0006753;GO:0006754;GO:0006793;GO:0006796;GO:0006807;GO:0006810;GO:0006811;GO:0006812;GO:0006818;GO:0008150;GO:0008152;GO:0008324;GO:0009056;GO:0009058;GO:0009116;GO:0009117;GO:0009119;GO:0009123;GO:…	Cytoplasmic		agar_lowpH;control_lowpH;oxidative_lowpH;25C_lowpH;agar_42C;control_42C;oxidative_42C;25C_42C;oxidative_agar;25C_agar;25C_control
5.19203	7.46766	-6.44284	-7.46766	5.07071	-5.35659	+	+	Cluster 415	Cluster 48	5	59.8	12.094	0	71.38	1326400000	103	7.36516	0.00313725	AFT93353.1	preprotein translocase subunit SecG [Francisella tularensis subsp. holarctica FSC200]	FTS_1734	secG	1.6844	Intracellular trafficking, secretion, and vesicular transport	U	COG1314	SecG	Preprotein translocase subunit SecG	Bacterial secretion system;Protein export;Quorum sensing	secG, preprotein translocase subunit SecG	K03075	Preprotein translocase subunit SecG	GO:0005575;GO:0005623;GO:0005886;GO:0006810;GO:0006886;GO:0008104;GO:0008150;GO:0009306;GO:0009987;GO:0015031;GO:0016020;GO:0032940;GO:0033036;GO:0034613;GO:0043952;GO:0044464;GO:0044699;GO:0044763;GO:0044765;GO:0045184;GO:0046903;GO:0046907;GO:0051179;GO:0051234;GO:0051641;GO:0051649;GO:0055085;GO:0065002;GO:0070727;GO:0071702;GO:0071806;GO:0071944	CytoplasmicMembrane		agar_lowpH;control_lowpH;oxidative_lowpH;25C_lowpH;control_42C;oxidative_42C;25C_42C;oxidative_agar;25C_agar;25C_control;25C_oxidative
5.5228	6.93833	-5.79787	-6.93833	4.77936	-4.62977	+	+	Cluster 415	Cluster 48	14	82.2	19.202	0	149.85	4072700000	298	6.9801	0.00311688	AFT93373.1	F0F1 ATP synthase subunit delta [Francisella tularensis subsp. holarctica FSC200]	FTS_1754	atpH	2.05904	Energy production and conversion	C	COG0712	AtpH	FoF1-type ATP synthase, delta subunit	Metabolic pathways;Oxidative phosphorylation	ATPF1D, F-type H+transporting ATPase subunit delta	K02113	F(1)F(0) ATP synthase produces ATP from ADP in the presence of a proton or sodium gradient. F-type ATPases consist of two structural domains, F(1) containing the extramembraneous catalytic core and F(0) containing the membrane proton channel, linked together by a central stalk and a peripheral stalk. During catalysis, ATP synthesis in the catalytic domain of F(1) is coupled via a rotary mechanism…	GO:0003674;GO:0003824;GO:0005215;GO:0005575;GO:0005622;GO:0005623;GO:0005886;GO:0006139;GO:0006152;GO:0006163;GO:0006164;GO:0006195;GO:0006200;GO:0006725;GO:0006753;GO:0006754;GO:0006793;GO:0006796;GO:0006807;GO:0006810;GO:0006811;GO:0006812;GO:0006818;GO:0008150;GO:0008152;GO:0008324;GO:0009056;GO:0009058;GO:0009116;GO:0009117;GO:0009119;GO:0009123;GO:0009124;GO:0009125;GO:0009126;GO:0009127;GO:…	Cytoplasmic		agar_lowpH;control_lowpH;oxidative_lowpH;25C_lowpH;agar_42C;control_42C;oxidative_42C;25C_42C;oxidative_agar;25C_agar;25C_control
4.89344	4.80824	-4.27579	-4.89344	3.85705	-2.41339	+	+	Cluster 415	Cluster 48	5	12.4	44.845	0	35.263	1550400000	65	5.68084	0.0124806	AFT93175.1	major facilitator transporter [Francisella tularensis subsp. holarctica FSC200]	FTS_1492		1.91575									transporter	GO:0003674;GO:0005215;GO:0005575;GO:0005623;GO:0005886;GO:0006810;GO:0008150;GO:0016020;GO:0044464;GO:0051179;GO:0051234;GO:0071944	CytoplasmicMembrane		agar_lowpH;control_lowpH;oxidative_lowpH;25C_lowpH;agar_42C;control_42C;oxidative_42C;25C_42C;25C_agar;25C_control
5.74309	-4.44255	-5.97446	-6.6816	-3.59077	6.6816		+	Cluster 165		83	54.5	155.89	0	323.31	14861000000	1271	6.9705	0.00315789	AFT92913.1;AFT92125.1	PdpC protein [Francisella tularensis subsp. holarctica FSC200];PdpC protein [Francisella tularensis subsp. holarctica FSC200]	FTS_1130;FTS_0102	pdpC2;pdpC1												Cytoplasmic		control_lowpH;oxidative_lowpH;25C_lowpH;control_agar;oxidative_agar;25C_agar;oxidative_42C;25C_42C;25C_control
6.49464	-4.33711	-5.7171	-6.49464	-5.87583	5.64028		+	Cluster 165		8	60.2	14.607	0	30.498	308690000	63	7.10585	0.00365517	AFT92959.1	hypothetical protein FTS_1192 [Francisella tularensis subsp. holarctica FSC200]	FTS_1192													Unknown		lowpH_agar;oxidative_agar;control_agar;25C_agar;oxidative_42C;control_42C;25C_42C;control_lowpH;25C_lowpH
-5.66052	-4.96526	-3.70758	-5.26007	2.83405	5.66052		+	Cluster 430		13	61.7	22.133	0	323.31	23351000000	545	5.74708	0.0095057	AFT92910.1;AFT92122.1	intracellular growth locus protein C [Francisella tularensis subsp. holarctica FSC200];intracellular growth locus protein C [Francisella tularensis subsp. holarctica FSC200]	FTS_1127;FTS_0099	iglC2;iglC1												Unknown		lowpH_agar;42C_agar;control_agar;oxidative_agar;25C_agar;control_lowpH;oxidative_lowpH;25C_lowpH;25C_42C
-9.55689	-8.90959	-7.85127	-8.91852	-7.1464	9.55689		+	Cluster 430		24	58.6	39.225	0	323.31	14216000000	341	9.53101	0	AFT93438.1;AFT93029.1;AFT92250.1	hypothetical protein FTS_1842 [Francisella tularensis subsp. holarctica FSC200];hypothetical protein FTS_1289 [Francisella tularensis subsp. holarctica FSC200];hypothetical protein FTS_0261 [Francisella tularensis subsp. holarctica FSC200]	FTS_1842;FTS_1289;FTS_0261													Unknown		oxidative_lowpH;25C_lowpH;control_lowpH;oxidative_agar;25C_agar;control_agar;control_42C;control_oxidative
-7.892	-8.05292	7.96492	-7.21241	-5.21075	8.05292		+	Cluster 437		35	70.3	53.302	0	323.31	7654100000	358	9.22521	0	AFT92583.1	hypothetical protein FTS_0703 [Francisella tularensis subsp. holarctica FSC200]	FTS_0703													Unknown		oxidative_agar;25C_agar;control_agar;oxidative_lowpH;25C_lowpH;control_lowpH;oxidative_42C;25C_42C;control_42C;control_oxidative;control_25C
-7.05134	-5.8589	6.9748	-4.081	7.05134	6.2376		+	Cluster 454		17	76.1	23.435	0	294.75	4815900000	370	7.78092	0.0190899	AFT93299.1	lipoprotein releasing system, subunit A, outer membrane lipoproteins carrier [Francisella tularensis subsp. holarctica FSC200]	FTS_1661	lolA		Cell wall/membrane/envelope biogenesis	M	COG2834	LolA	Outer membrane lipoprotein-sorting protein		lolA, outer membrane lipoprotein carrier protein	K03634	Participates in the translocation of lipoproteins from the inner membrane to the outer membrane. Only forms a complex with a lipoprotein if the residue after the N-terminal Cys is not an aspartate (The Asp acts as a targeting signal to indicate that the lipoprotein should stay in the inner membrane) (By similarity)	GO:0003674;GO:0005215;GO:0005575;GO:0005623;GO:0006810;GO:0008104;GO:0008150;GO:0008565;GO:0009306;GO:0009987;GO:0015031;GO:0022892;GO:0030288;GO:0030312;GO:0030313;GO:0031975;GO:0032940;GO:0033036;GO:0042597;GO:0042953;GO:0042954;GO:0044462;GO:0044464;GO:0044699;GO:0044763;GO:0044765;GO:0045184;GO:0046903;GO:0051179;GO:0051234;GO:0051641;GO:0051649;GO:0071702;GO:0071944	Periplasmic		agar_lowpH;oxidative_lowpH;control_lowpH;25C_lowpH;agar_42C;oxidative_42C;control_42C;25C_42C;oxidative_agar;control_agar;25C_agar;25C_oxidative;25C_control
-8.49054	-6.03448	6.35199	-7.91248	8.49054	7.3679		+	Cluster 454		8	29.5	29.359	0	33.499	329510000	37	8.89795	0	AFT93308.1	hypothetical protein FTS_1674 [Francisella tularensis subsp. holarctica FSC200]	FTS_1674			Inorganic ion transport and metabolism	P	COG3022	YaaA	Cytoplasmic iron level regulating protein YaaA, DUF328/UPF0246 family		uncharacterized protein	K09861	UPF0246 protein	GO:0006950;GO:0006979;GO:0008150;GO:0033194;GO:0042221;GO:0050896;GO:1901700	Cytoplasmic		agar_lowpH;oxidative_lowpH;control_lowpH;25C_lowpH;agar_42C;oxidative_42C;control_42C;25C_42C;oxidative_agar;control_agar;25C_agar;control_oxidative;25C_oxidative
-7.02528	4.77206	5.6106	7.02528	-4.01381	6.43633		+	Cluster 373		8	22.5	50.009	0	13.894	819640000	64	6.92017	0.0048	AFT93038.1	L-serine dehydratase [Francisella tularensis subsp. holarctica FSC200]	FTS_1301	sdaA		Amino acid transport and metabolism	E	COG1760	SdaA	L-serine deaminase	Biosynthesis of amino acids;Biosynthesis of antibiotics;Biosynthesis of secondary metabolites;Carbon metabolism;Cysteine and methionine metabolism;Glycine, serine and threonine metabolism;Metabolic pathways	E4.3.1.17, L-serine dehydratase [EC:4.3.1.17]	K01752	L-serine dehydratase	GO:0006082;GO:0006520;GO:0006807;GO:0008150;GO:0008152;GO:0009987;GO:0019752;GO:0043436;GO:0044237;GO:0044238;GO:0044281;GO:0044710;GO:0071704;GO:1901564	Cytoplasmic		42C_lowpH;25C_lowpH;oxidative_lowpH;control_lowpH;42C_agar;25C_agar;oxidative_agar;control_agar;control_42C;control_25C;control_oxidative
-8.42731	8.20637	6.17041	5.58293	8.42731	8.10001		+	Cluster 411		8	60.1	16.416	0	67.448	375100000	55	8.70139	0	AFT93383.1	ribosome-binding factor A [Francisella tularensis subsp. holarctica FSC200]	FTS_1764	rbfA		Translation, ribosomal structure and biogenesis	J	COG0858	RbfA	Ribosome-binding factor A		rbfA, ribosome-binding factor A	K02834	Associates with free 30S ribosomal subunits (but not with 30S subunits that are part of 70S ribosomes or polysomes). Essential for efficient processing of 16S rRNA. May interact with the 5'-terminal helix region of 16S rRNA (By similarity)	GO:0005575;GO:0005622;GO:0005623;GO:0005737;GO:0006139;GO:0006364;GO:0006396;GO:0006725;GO:0006807;GO:0008150;GO:0008152;GO:0009987;GO:0010467;GO:0016070;GO:0016072;GO:0022613;GO:0030490;GO:0034470;GO:0034641;GO:0034660;GO:0042254;GO:0042274;GO:0043170;GO:0044085;GO:0044237;GO:0044238;GO:0044260;GO:0044424;GO:0044464;GO:0046483;GO:0071704;GO:0071840;GO:0090304;GO:1901360	Cytoplasmic		25C_lowpH;oxidative_lowpH;control_lowpH;25C_42C;oxidative_42C;control_42C;25C_agar;oxidative_agar;control_agar;oxidative_25C;control_25C
-6.64947	5.98297	5.83907	4.84473	3.86376	6.64947		+	Cluster 411		4	12	63.478	0	11.762	129480000	16	6.57438	0.00274453	AFT92533.1	prolyl-tRNA synthetase [Francisella tularensis subsp. holarctica FSC200]	FTS_0645	proS		Translation, ribosomal structure and biogenesis	J	COG0442	ProS	Prolyl-tRNA synthetase	Aminoacyl-tRNA biosynthesis	PARS, prolyl-tRNA synthetase [EC:6.1.1.15]	K01881	Catalyzes the attachment of proline to tRNA(Pro) in a two-step reaction proline is first activated by ATP to form Pro- AMP and then transferred to the acceptor end of tRNA(Pro). As ProRS can inadvertently accommodate and process non-cognate amino acids such as alanine and cysteine, to avoid such errors it has two additional distinct editing activities against alanine. One activity is designated a…	GO:0002161;GO:0003674;GO:0003824;GO:0004812;GO:0004827;GO:0005575;GO:0005618;GO:0005622;GO:0005623;GO:0005737;GO:0005829;GO:0005886;GO:0006082;GO:0006139;GO:0006399;GO:0006412;GO:0006417;GO:0006418;GO:0006433;GO:0006448;GO:0006450;GO:0006520;GO:0006725;GO:0006807;GO:0008150;GO:0008152;GO:0009058;GO:0009059;GO:0009889;GO:0009987;GO:0010467;GO:0010468;GO:0010556;GO:0010608;GO:0016020;GO:0016070;GO:…	Cytoplasmic		oxidative_agar;control_agar;25C_agar;oxidative_lowpH;control_lowpH;25C_lowpH;oxidative_42C;control_42C;25C_42C;control_oxidative;25C_oxidative
-6.37486	3.62385	4.30782	3.70249	6.02397	6.37486		+	Cluster 411		6	36	22.303	0	30.367	376320000	55	6.26598	0.0078565	AFT92736.1	ribosome biogenesis GTP-binding protein YsxC [Francisella tularensis subsp. holarctica FSC200]	FTS_0895	engB		Cell cycle control, cell division, chromosome partitioning	D	COG0218	EngB	GTP-binding protein EngB required for normal cell division		engB, GTP-binding protein	K03978	Necessary for normal cell division and for the maintenance of normal septation (By similarity)	GO:0000910;GO:0005575;GO:0005622;GO:0005623;GO:0005737;GO:0005829;GO:0007049;GO:0008150;GO:0009987;GO:0022402;GO:0044424;GO:0044444;GO:0044464;GO:0044699;GO:0044763;GO:0051301	Unknown		control_lowpH;oxidative_lowpH;25C_lowpH;control_agar;oxidative_agar;25C_agar;control_42C;oxidative_42C;25C_42C;25C_control;25C_oxidative
-9.08803	8.25253	9.08803	8.9793	8.14428	8.7045		+	Cluster 411		2	3.3	69.764	0.0063762	2.6038	496920000	17	9.36444	0	AFT92613.1	tRNA uridine 5-carboxymethylaminomethyl modification enzyme GidA [Francisella tularensis subsp. holarctica FSC200]	FTS_0739	gidA		Translation, ribosomal structure and biogenesis	J	COG0445	MnmG	tRNA U34 5-carboxymethylaminomethyl modifying enzyme MnmG/GidA		gidA, tRNA uridine 5-carboxymethylaminomethyl modification enzyme	K03495	NAD-binding protein involved in the addition of a carboxymethylaminomethyl (cmnm) group at the wobble position (U34) of certain tRNAs, forming tRNA-cmnm(5)s(2)U34 (By similarity)	GO:0000166;GO:0001510;GO:0003674;GO:0005488;GO:0005575;GO:0005622;GO:0005623;GO:0005737;GO:0006139;GO:0006396;GO:0006399;GO:0006400;GO:0006725;GO:0006807;GO:0008033;GO:0008150;GO:0008152;GO:0009451;GO:0009987;GO:0010467;GO:0016070;GO:0030488;GO:0032259;GO:0034470;GO:0034641;GO:0034660;GO:0036094;GO:0043167;GO:0043168;GO:0043170;GO:0043412;GO:0043414;GO:0044237;GO:0044238;GO:0044260;GO:0044424;GO:…	Cytoplasmic		oxidative_lowpH;control_lowpH;25C_lowpH;oxidative_agar;control_agar;25C_agar;oxidative_42C;control_42C;25C_42C;25C_oxidative
7.20713	-4.80954	-6.33839	-7.20713	-5.61741	-6.53044		+	Cluster 425		20	62.7	36.704	0	81.718	1323000000	118	7.08747	0.0162643	AFT93058.1	hypothetical protein FTS_1331 [Francisella tularensis subsp. holarctica FSC200]	FTS_1331			Lipid transport and metabolism	I							exported protein		Unknown		control_agar;25C_agar;oxidative_agar;control_lowpH;25C_lowpH;oxidative_lowpH;control_42C;25C_42C;oxidative_42C
8.45903	-5.19768	-7.90867	-8.45903	-6.83572	-8.01972		+	Cluster 425		32	63.3	62.733	0	196.29	4983900000	466	8.62606	0.01521	AFT93184.1	cell division protein, peptidoglycan synthetase (PBP) [Francisella tularensis subsp. holarctica FSC200]	FTS_1503	ftsI		Cell cycle control, cell division, chromosome partitioning;Cell wall/membrane/envelope biogenesis	D;M	COG0768	FtsI	Cell division protein FtsI/penicillin-binding protein 2	beta-Lactam resistance;Peptidoglycan biosynthesis	ftsI, cell division protein FtsI (penicillin-binding protein 3) [EC:3.4.16.4]	K03587	peptidoglycan synthetase ftsI	GO:0000003;GO:0000270;GO:0000910;GO:0003674;GO:0003824;GO:0005488;GO:0005575;GO:0005576;GO:0005618;GO:0005623;GO:0005886;GO:0005887;GO:0006022;GO:0006023;GO:0006024;GO:0006807;GO:0007049;GO:0008144;GO:0008150;GO:0008152;GO:0008658;GO:0008955;GO:0009058;GO:0009059;GO:0009252;GO:0009273;GO:0009274;GO:0009276;GO:0009987;GO:0016020;GO:0016021;GO:0016740;GO:0016757;GO:0016758;GO:0019954;GO:0022402;GO:…	CytoplasmicMembrane		agar_lowpH;42C_lowpH;control_lowpH;oxidative_lowpH;25C_lowpH;control_agar;oxidative_agar;25C_agar;control_42C;oxidative_42C;25C_42C;25C_control;25C_oxidative
7.42757	-4.18125	-5.31251	5.17272	-6.24834	-7.42757		+	Cluster 166		3	20.8	19.786	0	32.444	438240000	46	7.18888	0.0224296	AFT92320.1	hypothetical protein FTS_0364 [Francisella tularensis subsp. holarctica FSC200]	FTS_0364													CytoplasmicMembrane		42C_agar;lowpH_agar;oxidative_agar;control_agar;25C_agar;oxidative_42C;control_42C;25C_42C;control_lowpH;25C_lowpH;25C_oxidative;25C_control
9.3644	-7.42283	-8.38056	10.3327	-10.3327	-9.80989		+	Cluster 166		6	42.2	16.199	0	19.968	180960000	33	10.7479	0	AFT93409.1	hypothetical protein FTS_1795 [Francisella tularensis subsp. holarctica FSC200]	FTS_1795													Unknown		42C_agar;lowpH_agar;oxidative_agar;control_agar;25C_agar;oxidative_42C;control_42C;25C_42C;control_lowpH;25C_lowpH;25C_oxidative
9.16343	7.53061	6.26755	7.7436	-9.16343	-8.76704		+	Cluster 161		7	47.2	16.74	0	50.237	1777900000	114	9.66906	0.00121519	AFT93480.1	HSP20 family protein [Francisella tularensis subsp. holarctica FSC200]	FTS_1903	hsp		Posttranslational modification, protein turnover, chaperones	O	COG0071	IbpA	Molecular chaperone IbpA, HSP20 family		HSP20, HSP20 family protein	K13993	Heat shock protein		Cytoplasmic		lowpH_agar;42C_agar;oxidative_agar;25C_agar;control_agar;oxidative_lowpH;25C_lowpH;control_lowpH;oxidative_42C;25C_42C;control_42C
5.40868	7.17306	-4.24927	4.31873	-7.17306	-6.27719		+	Cluster 161		4	43.5	12.202	0	28.867	123520000	25	7.11527	0.00918219	AFT92964.1	thioredoxin [Francisella tularensis subsp. holarctica FSC200]	FTS_1200	trx2		Posttranslational modification, protein turnover, chaperones	O	COG0526	TrxA	Thiol-disulfide isomerase or thioredoxin		trxA, thioredoxin 1	K03671	Thioredoxin		Cytoplasmic		42C_lowpH;oxidative_lowpH;25C_lowpH;control_lowpH;42C_agar;oxidative_agar;25C_agar;control_agar;oxidative_42C;25C_42C;control_42C;25C_oxidative;control_oxidative
9.32555	9.57486	-9.57486	8.10303	-7.75815	-8.3267		+	Cluster 161		7	66.7	10.184	0	55.327	1152700000	73	10.3235	0	AFT92437.1	cell division topological specificity factor MinE [Francisella tularensis subsp. holarctica FSC200]	FTS_0519	minE		Cell cycle control, cell division, chromosome partitioning	D	COG0851	MinE	Septum formation topological specificity factor MinE		minE, cell division topological specificity factor	K03608			Cytoplasmic		agar_lowpH;42C_lowpH;oxidative_lowpH;25C_lowpH;control_lowpH;oxidative_agar;25C_agar;control_agar;oxidative_42C;25C_42C;control_42C
1.3517	3.39426	1.96196	3.54771	2.18424	-3.54771		+	Cluster 157		6	16.8	62.952	0	14.381	104250000	20	3.51713	0.00987266	AFT93475.1	putative ABC transporter ATP-binding protein [Francisella tularensis subsp. holarctica FSC200]	FTS_1893			Function unknown	S							abc transporter atp-binding protein	GO:0003674;GO:0003824;GO:0005215;GO:0005575;GO:0005618;GO:0005622;GO:0005623;GO:0005737;GO:0005829;GO:0005886;GO:0006139;GO:0006152;GO:0006163;GO:0006195;GO:0006200;GO:0006725;GO:0006753;GO:0006793;GO:0006796;GO:0006807;GO:0006810;GO:0008150;GO:0008152;GO:0009056;GO:0009116;GO:0009117;GO:0009119;GO:0009123;GO:0009125;GO:0009126;GO:0009128;GO:0009141;GO:0009143;GO:0009144;GO:0009146;GO:0009150;GO:…	Cytoplasmic		lowpH_agar;42C_agar;25C_agar;control_agar;oxidative_agar;25C_lowpH;control_lowpH;oxidative_lowpH;control_42C;oxidative_42C;control_25C;oxidative_25C
7.1377	6.27988	5.86611	4.79432	-5.43853	-7.1377		+	Cluster 157		16	30.6	82.382	0	64.062	425250000	92	7.25796	0	AFT92488.1	isocitrate dehydrogenase [Francisella tularensis subsp. holarctica FSC200]	FTS_0587	icd		Energy production and conversion	C	COG0538	Icd	Isocitrate dehydrogenase	2-Oxocarboxylic acid metabolism;Biosynthesis of amino acids;Biosynthesis of antibiotics;Biosynthesis of secondary metabolites;Carbon metabolism;Citrate cycle (TCA cycle);Glutathione metabolism;Metabolic pathways;Microbial metabolism in diverse environments	IDH1, isocitrate dehydrogenase [EC:1.1.1.42]	K00031	Isocitrate dehydrogenase	GO:0003674;GO:0003824;GO:0004312;GO:0004318;GO:0004448;GO:0004450;GO:0005575;GO:0005622;GO:0005623;GO:0005737;GO:0006091;GO:0006099;GO:0008150;GO:0008152;GO:0009060;GO:0009987;GO:0015980;GO:0016491;GO:0016614;GO:0016616;GO:0016627;GO:0016628;GO:0016740;GO:0016746;GO:0016747;GO:0044237;GO:0044238;GO:0044424;GO:0044464;GO:0044710;GO:0045333;GO:0055114	Cytoplasmic		lowpH_agar;42C_agar;oxidative_agar;25C_agar;control_agar;oxidative_lowpH;25C_lowpH;control_lowpH;25C_42C;control_42C;control_oxidative
3.96772	5.28384	2.88287	2.93761	3.0519	-5.28384		+	Cluster 157		16	46.1	50.05	0	120.98	1284500000	160	4.8029	0.0261353	AFT93218.1	acetyl-CoA carboxylase, biotin carboxylase subunit [Francisella tularensis subsp. holarctica FSC200]	FTS_1551	accC		Lipid transport and metabolism	I	COG0439	AccC	Biotin carboxylase	Biosynthesis of antibiotics;Biosynthesis of secondary metabolites;Carbon metabolism;Fatty acid metabolism;Galactose metabolism;Metabolic pathways;Microbial metabolism in diverse environments;Propanoate metabolism;Pyruvate metabolism	accC, acetyl-CoA carboxylase, biotin carboxylase subunit [EC:6.4.1.2 6.3.4.14]	K01961	acetyl-CoA carboxylase biotin carboxylase	GO:0003674;GO:0003824;GO:0004075;GO:0005575;GO:0005622;GO:0005623;GO:0005737;GO:0006082;GO:0006629;GO:0006631;GO:0006633;GO:0008150;GO:0008152;GO:0008610;GO:0009058;GO:0009317;GO:0009889;GO:0009890;GO:0009892;GO:0009987;GO:0010565;GO:0016053;GO:0016874;GO:0016879;GO:0019216;GO:0019217;GO:0019222;GO:0019752;GO:0031323;GO:0031324;GO:0031326;GO:0031327;GO:0032787;GO:0032991;GO:0042304;GO:0043234;GO:…	Cytoplasmic		lowpH_agar;42C_agar;control_agar;oxidative_agar;25C_agar;42C_lowpH;control_lowpH;oxidative_lowpH;25C_lowpH
4.01505	3.656	-4.72327	5.1349	-4.45386	-5.1349		+	Cluster 364		6	55	15.427	0	74.763	219420000	35	5.8716	0.00333333	AFT93025.1	nucleoside diphosphate kinase [Francisella tularensis subsp. holarctica FSC200]	FTS_1283	ndk		Nucleotide transport and metabolism	F	COG0105	Ndk	Nucleoside diphosphate kinase	Biosynthesis of antibiotics;Biosynthesis of secondary metabolites;Metabolic pathways;Purine metabolism;Pyrimidine metabolism	ndk, nucleoside-diphosphate kinase [EC:2.7.4.6]	K00940	Major role in the synthesis of nucleoside triphosphates other than ATP. The ATP gamma phosphate is transferred to the NDP beta phosphate via a ping-pong mechanism, using a phosphorylated active-site intermediate (By similarity)	GO:0003674;GO:0003824;GO:0004518;GO:0004550;GO:0005575;GO:0005576;GO:0005622;GO:0005623;GO:0005737;GO:0005886;GO:0006139;GO:0006165;GO:0006464;GO:0006468;GO:0006725;GO:0006753;GO:0006793;GO:0006796;GO:0006807;GO:0008150;GO:0008152;GO:0009058;GO:0009117;GO:0009132;GO:0009165;GO:0009987;GO:0015949;GO:0016020;GO:0016301;GO:0016310;GO:0016740;GO:0016772;GO:0016776;GO:0016787;GO:0016788;GO:0018130;GO:…	Extracellular		42C_agar;25C_agar;oxidative_agar;control_agar;42C_lowpH;25C_lowpH;oxidative_lowpH;control_lowpH;control_42C
3.84291	4.12278	-5.87453	5.87453	-2.99311	-5.43777		+	Cluster 364		27	37.1	89.74	0	98.247	484230000	99	6.06491	0	AFT93191.1	DNA gyrase subunit B [Francisella tularensis subsp. holarctica FSC200]	FTS_1511	gyrB		Replication, recombination and repair	L	COG0187	GyrB	DNA gyrase/topoisomerase IV, subunit B		gyrB, DNA gyrase subunit B [EC:5.99.1.3]	K02470	DNA gyrase negatively supercoils closed circular double- stranded DNA in an ATP-dependent manner and also catalyzes the interconversion of other topological isomers of double-stranded DNA rings, including catenanes and knotted rings (By similarity)	GO:0000166;GO:0001882;GO:0001883;GO:0003674;GO:0003824;GO:0003916;GO:0003918;GO:0005488;GO:0005524;GO:0005575;GO:0005622;GO:0005623;GO:0005737;GO:0006139;GO:0006152;GO:0006163;GO:0006195;GO:0006200;GO:0006259;GO:0006260;GO:0006261;GO:0006265;GO:0006351;GO:0006725;GO:0006753;GO:0006793;GO:0006796;GO:0006807;GO:0007059;GO:0008094;GO:0008150;GO:0008152;GO:0009056;GO:0009058;GO:0009059;GO:0009116;GO:…	Cytoplasmic		42C_agar;25C_agar;oxidative_agar;control_agar;25C_lowpH;oxidative_lowpH;control_lowpH;25C_42C;oxidative_42C;control_42C
4.19275	3.93199	-2.47122	1.84252	-2.85627	-4.19275		+	Cluster 364		2	16.9	20.902	0	5.4035	47442000	6	4.48706	0.0148662	AFT92175.1	elongation factor P [Francisella tularensis subsp. holarctica FSC200]	FTS_0178	efp		Translation, ribosomal structure and biogenesis	J	COG0231	Efp	Translation elongation factor P (EF-P)/translation initiation factor 5A (eIF-5A)		efp, elongation factor P	K02356	Involved in peptide bond synthesis. Alleviates ribosome stalling that occurs when 3 or more consecutive Pro residues or the sequence PPG is present in a protein, possibly by augmenting the peptidyl transferase activity of the ribosome. Modification of Lys-34 is required for alleviation (By similarity)	GO:0003674;GO:0003676;GO:0003723;GO:0003746;GO:0005488;GO:0005575;GO:0005622;GO:0005623;GO:0005737;GO:0006412;GO:0006414;GO:0008135;GO:0008150;GO:0008152;GO:0009058;GO:0009059;GO:0009987;GO:0010467;GO:0019538;GO:0034645;GO:0040007;GO:0043021;GO:0043022;GO:0043170;GO:0044237;GO:0044238;GO:0044249;GO:0044260;GO:0044267;GO:0044424;GO:0044464;GO:0071704;GO:0097159;GO:1901363;GO:1901576	Cytoplasmic		42C_agar;lowpH_agar;control_agar;oxidative_agar;25C_agar;lowpH_42C;control_42C;oxidative_42C;25C_42C;control_lowpH;oxidative_lowpH;25C_lowpH;25C_control
3.50448	4.48341	-3.44323	2.89842	-2.23574	-4.48341		+	Cluster 364		4	23.4	24.39	0	19.204	161270000	31	4.59324	0.017741	AFT92647.1	adenylate kinase [Francisella tularensis subsp. holarctica FSC200]	FTS_0787	adk		Nucleotide transport and metabolism	F	COG0563	Adk	Adenylate kinase or related kinase	Biosynthesis of antibiotics;Biosynthesis of secondary metabolites;Metabolic pathways;Purine metabolism;Thiamine metabolism	adk, adenylate kinase [EC:2.7.4.3]	K00939	Catalyzes the reversible transfer of the terminal phosphate group between ATP and AMP. Plays an important role in cellular energy homeostasis and in adenine nucleotide metabolism (By similarity)	GO:0000166;GO:0000287;GO:0001882;GO:0001883;GO:0003674;GO:0003824;GO:0004017;GO:0005488;GO:0005524;GO:0005575;GO:0005622;GO:0005623;GO:0005737;GO:0005829;GO:0006139;GO:0006163;GO:0006164;GO:0006172;GO:0006412;GO:0006629;GO:0006644;GO:0006725;GO:0006753;GO:0006793;GO:0006796;GO:0006807;GO:0008150;GO:0008152;GO:0008610;GO:0008654;GO:0009058;GO:0009059;GO:0009116;GO:0009117;GO:0009119;GO:0009123;GO:…	Cytoplasmic		lowpH_control;oxidative_control;25C_control;agar_control;25C_42C;agar_42C;25C_lowpH;agar_lowpH;25C_oxidative;agar_oxidative
4.37346	-4.37346	-2.91461	4.31411	-3.01673	-3.59874		+	Cluster 409		2	4.5	52.579	0	3.3584	2681200000	7	5.11321	0.00772973	AFT92699.1	hypothetical protein FTS_0852 [Francisella tularensis subsp. holarctica FSC200]	FTS_0852			Function unknown	S							UPF0061 protein		Cytoplasmic		lowpH_control;25C_control;agar_control;25C_oxidative;agar_oxidative;25C_42C;agar_42C;25C_lowpH;agar_lowpH;agar_25C
-5.73285	-4.90387	-4.78067	5.73285	-5.38335	-3.72136		+	Cluster 428		10	40.1	33.099	0	28.548	611310000	44	5.74368	0.00317881	AFT92805.1	oxidative stress transcriptional regulator [Francisella tularensis subsp. holarctica FSC200]	FTS_0989	oxyR		Transcription	K	COG0583	LysR	DNA-binding transcriptional regulator, LysR family		oxyR, LysR family transcriptional regulator, hydrogen peroxide-inducible genes activator	K04761	Transcriptional regulator	GO:0000975;GO:0000976;GO:0000984;GO:0000986;GO:0000987;GO:0001017;GO:0001067;GO:0001071;GO:0001121;GO:0001130;GO:0001131;GO:0001159;GO:0003674;GO:0003676;GO:0003677;GO:0003700;GO:0005488;GO:0006139;GO:0006351;GO:0006355;GO:0006725;GO:0006807;GO:0006950;GO:0006974;GO:0006979;GO:0008150;GO:0008152;GO:0009058;GO:0009059;GO:0009889;GO:0009987;GO:0010467;GO:0010468;GO:0010556;GO:0016070;GO:0018130;GO:…	Cytoplasmic		42C_control;oxidative_control;25C_control;agar_control;oxidative_lowpH;25C_lowpH;agar_lowpH;25C_42C;agar_42C;25C_oxidative;agar_oxidative;agar_25C
7.72909	8.76712	6.05477	-8.76712	6.87013	7.99043		+	Cluster -94		22	51.7	50.527	0	218.68	2331500000	259	8.64478	0	AFT92289.1	dihydrolipoamide dehydrogenase [Francisella tularensis subsp. holarctica FSC200]	FTS_0311	lpdA		Energy production and conversion	C	COG1249	Lpd	Pyruvate/2-oxoglutarate dehydrogenase complex, dihydrolipoamide dehydrogenase (E3) component or related enzyme	Biosynthesis of antibiotics;Biosynthesis of secondary metabolites;Carbon metabolism;Citrate cycle (TCA cycle);Glycine, serine and threonine metabolism;Glycolysis / Gluconeogenesis;Glyoxylate and dicarboxylate metabolism;Metabolic pathways;Microbial metabolism in diverse environments;Propanoate metabolism;Pyruvate metabolism;Valine, leucine and isoleucine degradation	DLD, dihydrolipoamide dehydrogenase [EC:1.8.1.4]	K00382	dihydrolipoyl dehydrogenase	GO:0000166;GO:0003674;GO:0003824;GO:0004148;GO:0005488;GO:0005575;GO:0005622;GO:0005623;GO:0005737;GO:0005829;GO:0005886;GO:0006082;GO:0006084;GO:0006085;GO:0006086;GO:0006090;GO:0006103;GO:0006520;GO:0006544;GO:0006546;GO:0006637;GO:0006732;GO:0006793;GO:0006807;GO:0008150;GO:0008152;GO:0008270;GO:0009056;GO:0009058;GO:0009063;GO:0009069;GO:0009071;GO:0009108;GO:0009987;GO:0015036;GO:0016020;GO:…	Cytoplasmic		25C_lowpH;agar_lowpH;25C_42C;agar_42C;25C_control;agar_control;25C_oxidative;agar_oxidative
-7.10414	10.4173	-10.4173	-9.91676	-7.16519	8.44248		+	Cluster -408		45	80.8	57.774	0	323.31	15048000000	679	10.394	0	AFT93343.1	glycerol-3-phosphate dehydrogenase [Francisella tularensis subsp. holarctica FSC200]	FTS_1717	glpD		Energy production and conversion	C	COG0578	GlpA	Glycerol-3-phosphate dehydrogenase	Biosynthesis of secondary metabolites;Glycerophospholipid metabolism	glpA, glycerol-3-phosphate dehydrogenase [EC:1.1.5.3]	K00111	Glycerol-3-phosphate dehydrogenase	GO:0005575;GO:0005622;GO:0005623;GO:0005737;GO:0005886;GO:0016020;GO:0044424;GO:0044464;GO:0071944	Unknown		oxidative_control;25C_control;agar_control;25C_lowpH;agar_lowpH;25C_42C;agar_42C;agar_oxidative;agar_25C
-11.2026	10.6989	-7.62333	-10.8712	10.4218	11.2026		+	Cluster 412		26	87.9	26.421	0	256.27	12796000000	637	11.8767	0	AFT92211.1	30S ribosomal protein S2 [Francisella tularensis subsp. holarctica FSC200]	FTS_0221	rpsB		Translation, ribosomal structure and biogenesis	J	COG0052	RpsB	Ribosomal protein S2	Ribosome	RP-S2, small subunit ribosomal protein S2	K02967	30S ribosomal protein S2	GO:0003674;GO:0003735;GO:0005198;GO:0005488;GO:0005575;GO:0005618;GO:0005622;GO:0005623;GO:0005737;GO:0005829;GO:0005840;GO:0005886;GO:0006412;GO:0008150;GO:0008152;GO:0008270;GO:0009058;GO:0009059;GO:0009987;GO:0010467;GO:0015935;GO:0016020;GO:0019538;GO:0022626;GO:0022627;GO:0030312;GO:0030529;GO:0032991;GO:0034645;GO:0040007;GO:0043167;GO:0043169;GO:0043170;GO:0043226;GO:0043228;GO:0043229;GO:…	Cytoplasmic		control_42C;25C_42C;agar_42C;control_lowpH;25C_lowpH;agar_lowpH;25C_oxidative;agar_oxidative;agar_control;agar_25C
-10.4086	10.4086	-10.0673	-10.329	8.48393	8.4915		+	Cluster 412		5	58.6	12.201	0	103.52	1668300000	137	11.2437	0	AFT92228.1	50S ribosomal protein L22 [Francisella tularensis subsp. holarctica FSC200]	FTS_0238	rplV		Translation, ribosomal structure and biogenesis	J	COG0091	RplV	Ribosomal protein L22	Ribosome	RP-L22, large subunit ribosomal protein L22	K02890	The globular domain of the protein is located near the polypeptide exit tunnel on the outside of the subunit, while an extended beta-hairpin is found that lines the wall of the exit tunnel in the center of the 70S ribosome (By similarity)	GO:0003674;GO:0003735;GO:0005198;GO:0005575;GO:0005618;GO:0005623;GO:0006412;GO:0008150;GO:0008152;GO:0009058;GO:0009059;GO:0009987;GO:0010467;GO:0019538;GO:0030312;GO:0034645;GO:0040007;GO:0043170;GO:0044237;GO:0044238;GO:0044249;GO:0044260;GO:0044267;GO:0044464;GO:0071704;GO:0071944;GO:1901576	Cytoplasmic		control_42C;oxidative_42C;agar_42C;25C_42C;agar_lowpH;25C_lowpH;agar_control;25C_control;agar_oxidative;25C_oxidative
-9.38238	9.01118	-8.19742	-8.9307	8.21849	9.38238		+	Cluster 412		21	78.2	19.996	0	173.25	16675000000	615	10.5697	0	AFT92235.1	50S ribosomal protein L5 [Francisella tularensis subsp. holarctica FSC200]	FTS_0245	rplE		Translation, ribosomal structure and biogenesis	J	COG0094	RplE	Ribosomal protein L5	Ribosome	RP-L5, large subunit ribosomal protein L5	K02931	This is 1 of the proteins that binds and probably mediates the attachment of the 5S RNA into the large ribosomal subunit, where it forms part of the central protuberance. In the 70S ribosome it contacts protein S13 of the 30S subunit (bridge B1b), connecting the 2 subunits	GO:0003674;GO:0003735;GO:0005198;GO:0005575;GO:0005623;GO:0005886;GO:0006412;GO:0008150;GO:0008152;GO:0009058;GO:0009059;GO:0009987;GO:0010467;GO:0016020;GO:0019538;GO:0022613;GO:0034645;GO:0040007;GO:0042254;GO:0043170;GO:0044085;GO:0044237;GO:0044238;GO:0044249;GO:0044260;GO:0044267;GO:0044464;GO:0071704;GO:0071840;GO:0071944;GO:1901576	Cytoplasmic		control_42C;oxidative_42C;25C_42C;agar_42C;25C_lowpH;agar_lowpH;25C_control;agar_control;25C_oxidative;agar_oxidative
-3.64271	6.36906	-5.61299	-6.36906	5.0901	3.96973		+	Cluster 403		19	57.5	50.088	0	323.31	7879000000	450	6.51457	0.014059	AFT93279.1	membrane fusion protein [Francisella tularensis subsp. holarctica FSC200]	FTS_1630			Cell wall/membrane/envelope biogenesis;Defense mechanisms	M;V	COG0845	AcrA	Multidrug efflux pump subunit AcrA (membrane-fusion protein)	beta-Lactam resistance;Cationic antimicrobial peptide (CAMP) resistance	acrA, membrane fusion protein, multidrug efflux system	K03585	Efflux transporter, RND family, MFP subunit	GO:0005575;GO:0005623;GO:0005886;GO:0016020;GO:0044464;GO:0071944	CytoplasmicMembrane		agar_42C;25C_42C;agar_lowpH;25C_lowpH;agar_control;25C_control;agar_oxidative;25C_oxidative
-4.41349	7.12709	-5.86127	-7.12709	5.61015	4.75423		+	Cluster 403		8	61.5	13.235	0	94.387	887620000	115	7.04338	0.00115385	AFT92233.1	50S ribosomal protein L14 [Francisella tularensis subsp. holarctica FSC200]	FTS_0243	rplN		Translation, ribosomal structure and biogenesis	J	COG0093	RplN	Ribosomal protein L14	Ribosome	RP-L14, large subunit ribosomal protein L14	K02874	Binds to 23S rRNA. Forms part of two intersubunit bridges in the 70S ribosome (By similarity)	GO:0003674;GO:0003676;GO:0003723;GO:0003735;GO:0005198;GO:0005488;GO:0005575;GO:0005622;GO:0005623;GO:0005737;GO:0005829;GO:0005840;GO:0005886;GO:0006412;GO:0008150;GO:0008152;GO:0009058;GO:0009059;GO:0009987;GO:0010467;GO:0015934;GO:0016020;GO:0019538;GO:0019843;GO:0022625;GO:0022626;GO:0030529;GO:0032991;GO:0034645;GO:0040007;GO:0043170;GO:0043226;GO:0043228;GO:0043229;GO:0043232;GO:0044237;GO:…	Cytoplasmic		control_42C;oxidative_42C;agar_42C;25C_42C;agar_lowpH;25C_lowpH;agar_control;25C_control;agar_oxidative;25C_oxidative
-2.74074	5.51465	-5.44785	-5.51465	4.1624	3.24832		+	Cluster 403		10	33.6	24.988	0	76.307	1107000000	122	5.95115	0.00404145	AFT93400.1	NADH dehydrogenase I, C subunit [Francisella tularensis subsp. holarctica FSC200]	FTS_1785	nuoC		Energy production and conversion	C	COG0852	NuoC	NADH:ubiquinone oxidoreductase 27 kD subunit (chain C)	Metabolic pathways;Oxidative phosphorylation	nuoC, NADH-quinone oxidoreductase subunit C [EC:1.6.5.3]	K00332	NDH-1 shuttles electrons from NADH, via FMN and iron- sulfur (Fe-S) centers, to quinones in the respiratory chain. The immediate electron acceptor for the enzyme in this species is believed to be ubiquinone. Couples the redox reaction to proton translocation (for every two electrons transferred, four hydrogen ions are translocated across the cytoplasmic membrane), and thus conserves the redox ene…	GO:0003674;GO:0003824;GO:0003954;GO:0005575;GO:0005622;GO:0005623;GO:0005737;GO:0005829;GO:0005886;GO:0008150;GO:0008152;GO:0016020;GO:0016491;GO:0016651;GO:0016655;GO:0044424;GO:0044444;GO:0044464;GO:0044710;GO:0050136;GO:0055114;GO:0071944	Cytoplasmic		control_42C;agar_42C;25C_42C;agar_lowpH;25C_lowpH;agar_oxidative;25C_oxidative;25C_control;25C_agar
-4.74897	5.16254	-3.92991	-5.16254	4.04976	2.51469		+	Cluster 403		9	19.1	64.394	0	33.749	206780000	38	5.57464	0.0012	AFT93292.1	glycosyl transferase, group 2 [Francisella tularensis subsp. holarctica FSC200]	FTS_1654			Cell wall/membrane/envelope biogenesis	M							Glycosyl transferase family 2		CytoplasmicMembrane		agar_42C;25C_42C;agar_lowpH;25C_lowpH;agar_control;25C_control;agar_oxidative;25C_oxidative;25C_agar
-5.1312	5.1312	-4.31477	-2.79472	3.81398	4.55158		+	Cluster 403		15	56.5	20.891	0	182.32	5038000000	299	5.59699	0.0192021	AFT92908.1;AFT92120.1	iglA protein [Francisella tularensis subsp. holarctica FSC200];iglA protein [Francisella tularensis subsp. holarctica FSC200]	FTS_1125;FTS_0097	iglA2;iglA1		Intracellular trafficking, secretion, and vesicular transport;Intracellular trafficking, secretion, and vesicular transport	U	COG3516;COG3516	COG3516;COG3516	Predicted component of the type VI protein secretion system;Predicted component of the type VI protein secretion system		impB, type VI secretion system protein ImpB;impB, type VI secretion system protein ImpB	K11901;K11901	Intracellular growth locus, subunit A;Intracellular growth locus, subunit A		Cytoplasmic		lowpH_control;agar_control;25C_control;agar_oxidative;25C_oxidative;agar_42C;25C_42C;25C_lowpH;25C_agar
-5.55437	5.55437	-2.87494	-3.64551	4.03158	3.88891		+	Cluster 403		11	40.3	23.816	0	37.533	671310000	43	5.30318	0	AFT92794.1	ubiquinone biosynthesis protein [Francisella tularensis subsp. holarctica FSC200]	FTS_0969			Coenzyme transport and metabolism	H	COG2941	Coq7	Demethoxyubiquinone hydroxylase, CLK1/Coq7/Cat5 family	Biosynthesis of secondary metabolites;Metabolic pathways;Ubiquinone and other terpenoid-quinone biosynthesis	COQ7, ubiquinone biosynthesis monooxygenase Coq7 [EC:1.14.13.-]	K06134	Oxygenase that introduces the hydroxyl group at carbon five of 2-nonaprenyl-3-methyl-6-methoxy-1,4-benzoquinol resulting in the formation of 2-nonaprenyl-3-methyl-5-hydroxy-6-methoxy-1,4- benzoquinol (By similarity)	GO:0005575;GO:0005623;GO:0005886;GO:0016020;GO:0044464;GO:0071944	Cytoplasmic		25C_42C;agar_42C;25C_control;agar_control;agar_oxidative;agar_lowpH;agar_25C
-6.11747	4.47171	-5.10097	-5.84168	3.53915	6.11747		+	Cluster 403		10	40.8	28.691	0	131.14	569900000	60	6.55563	0.0024	AFT92998.1	biotin synthesis protein BioC [Francisella tularensis subsp. holarctica FSC200]	FTS_1246	bioC		Secondary metabolites biosynthesis, transport and catabolism;General function prediction only	Q;R	COG0500	SmtA	SAM-dependent methyltransferase	Biotin metabolism;Metabolic pathways	bioC, malonyl-CoA O-methyltransferase [EC:2.1.1.197]	K02169	biotin synthesis protein bioC		Cytoplasmic		oxidative_lowpH;agar_lowpH;25C_lowpH;agar_control;25C_control;agar_42C;25C_42C;agar_oxidative;25C_oxidative
-6.0099	8.76178	-8.14133	-8.76178	6.93974	7.59046		+	Cluster 403		13	58.6	29.955	0	265.25	5199800000	207	9.17956	0	AFT92493.1	UDP-glucose 4-epimerase [Francisella tularensis subsp. holarctica FSC200]	FTS_0593	wbtC		Cell wall/membrane/envelope biogenesis	M	COG1087	GalE	UDP-glucose 4-epimerase	Amino sugar and nucleotide sugar metabolism;Galactose metabolism;Metabolic pathways	galE, UDP-glucose 4-epimerase [EC:5.1.3.2]	K01784	Nad-dependent epimerase dehydratase	GO:0003674;GO:0003824;GO:0003978;GO:0005975;GO:0005996;GO:0006012;GO:0008150;GO:0008152;GO:0016853;GO:0016854;GO:0016857;GO:0019318;GO:0044238;GO:0044723;GO:0071704	Unknown		lowpH_42C;agar_42C;25C_42C;agar_oxidative;25C_oxidative;agar_control;25C_control;agar_lowpH;25C_lowpH
-6.24136	8.8362	-8.21213	-8.8362	6.27791	8.08646		+	Cluster 403		17	56.9	32.127	0	114.8	3022200000	238	9.33562	0	AFT92382.1	phosphatidylserine decarboxylase [Francisella tularensis subsp. holarctica FSC200]	FTS_0451	psd		Lipid transport and metabolism	I	COG0688	Psd	Phosphatidylserine decarboxylase	Biosynthesis of secondary metabolites;Glycerophospholipid metabolism;Metabolic pathways	psd, phosphatidylserine decarboxylase [EC:4.1.1.65]	K01613	Phosphatidylserine decarboxylase proenzyme	GO:0003674;GO:0003824;GO:0004609;GO:0005575;GO:0005623;GO:0005886;GO:0006629;GO:0006644;GO:0006793;GO:0006796;GO:0008150;GO:0008152;GO:0008610;GO:0008654;GO:0009058;GO:0009987;GO:0016020;GO:0016829;GO:0016830;GO:0016831;GO:0019637;GO:0044237;GO:0044238;GO:0044249;GO:0044255;GO:0044464;GO:0044710;GO:0071704;GO:0071944;GO:0090407;GO:1901576	CytoplasmicMembrane		oxidative_42C;control_42C;25C_42C;agar_42C;25C_lowpH;agar_lowpH;25C_oxidative;agar_oxidative;25C_control;agar_control
-6.47257	5.07401	-6.76221	-7.43112	7.02895	7.43112		+	Cluster 403		12	62.8	29.381	0	67.067	442730000	91	8.27468	0.00124675	AFT93256.1	hypothetical protein FTS_1600 [Francisella tularensis subsp. holarctica FSC200]	FTS_1600													Unknown		25C_lowpH;agar_lowpH;25C_42C;agar_42C;25C_oxidative;agar_oxidative;25C_control;agar_control
-7.13982	7.13982	-5.90136	-6.57766	4.28627	6.49612		+	Cluster 403		16	69.2	28.004	0	145.2	1264000000	132	7.79541	0.00118519	AFT92345.1	menaquinone biosynthesis methyltransferase [Francisella tularensis subsp. holarctica FSC200]	FTS_0396	ubiE		Coenzyme transport and metabolism	H	COG2226	UbiE	Ubiquinone/menaquinone biosynthesis C-methylase UbiE	Biosynthesis of secondary metabolites;Metabolic pathways;Ubiquinone and other terpenoid-quinone biosynthesis	ubiE, demethylmenaquinone methyltransferase / 2-methoxy-6-polyprenyl-1,4-benzoquinol methylase [EC:2.1.1.163 2.1.1.201]	K03183	Methyltransferase required for the conversion of demethylmenaquinone (DMKH2) to menaquinone (MKH2) and the conversion of 2-polyprenyl-6-methoxy-1,4-benzoquinol (DDMQH2) to 2-polyprenyl-3-methyl-6-methoxy-1,4-benzoquinol (DMQH2) (By similarity)	GO:0003674;GO:0003824;GO:0005575;GO:0005623;GO:0005886;GO:0006732;GO:0006733;GO:0006743;GO:0006744;GO:0008150;GO:0008152;GO:0008168;GO:0008169;GO:0008425;GO:0008757;GO:0009058;GO:0009108;GO:0009233;GO:0009234;GO:0009987;GO:0016020;GO:0016740;GO:0016741;GO:0030580;GO:0032259;GO:0040007;GO:0042180;GO:0042181;GO:0042375;GO:0043333;GO:0044237;GO:0044249;GO:0044281;GO:0044283;GO:0044464;GO:0044710;GO:…	Cytoplasmic		control_lowpH;oxidative_lowpH;agar_lowpH;25C_lowpH;oxidative_42C;agar_42C;25C_42C;25C_control;25C_oxidative
-6.55013	7.08903	-6.38697	-7.08903	5.38357	4.90194		+	Cluster 403		12	27.6	27.667	0	50.592	2555400000	160	7.61066	0.003275	AFT92804.1	hypothetical protein FTS_0988 [Francisella tularensis subsp. holarctica FSC200]	FTS_0988			Posttranslational modification, protein turnover, chaperones	O							Glutaredoxin		CytoplasmicMembrane		oxidative_42C;agar_42C;25C_42C;agar_control;25C_control;agar_lowpH;25C_lowpH;agar_oxidative;25C_oxidative
-6.78355	6.40864	-5.86374	-6.30943	6.78355	6.04729		+	Cluster 403		18	84.9	18.731	0	270.99	5072700000	338	8.00125	0.00112941	AFT93334.1	50S ribosomal protein L10 [Francisella tularensis subsp. holarctica FSC200]	FTS_1703	rplJ		Translation, ribosomal structure and biogenesis	J	COG0244	RplJ	Ribosomal protein L10	Ribosome	RP-L10, large subunit ribosomal protein L10	K02864	50S ribosomal protein L10	GO:0003674;GO:0003735;GO:0005198;GO:0005575;GO:0005618;GO:0005623;GO:0005886;GO:0006412;GO:0008150;GO:0008152;GO:0009058;GO:0009059;GO:0009987;GO:0010467;GO:0016020;GO:0019538;GO:0030312;GO:0034645;GO:0040007;GO:0043170;GO:0044237;GO:0044238;GO:0044249;GO:0044260;GO:0044267;GO:0044464;GO:0071704;GO:0071944;GO:1901576	Cytoplasmic		agar_lowpH;25C_lowpH;agar_42C;25C_42C;agar_control;25C_control;agar_oxidative;25C_oxidative
-6.24137	7.78038	-5.79839	-7.78038	6.61962	6.11359		+	Cluster 403		11	62	17.527	0	115.4	3147700000	226	7.94879	0	AFT92240.1	30S ribosomal protein S5 [Francisella tularensis subsp. holarctica FSC200]	FTS_0250	rpsE		Translation, ribosomal structure and biogenesis	J	COG0098	RpsE	Ribosomal protein S5	Ribosome	RP-S5, small subunit ribosomal protein S5	K02988	Located at the back of the 30S subunit body where it stabilizes the conformation of the head with respect to the body (By similarity)	GO:0003674;GO:0003735;GO:0005198;GO:0005575;GO:0005622;GO:0005623;GO:0005737;GO:0005829;GO:0005886;GO:0006412;GO:0008150;GO:0008152;GO:0009058;GO:0009059;GO:0009987;GO:0010467;GO:0016020;GO:0019538;GO:0034645;GO:0040007;GO:0043170;GO:0044237;GO:0044238;GO:0044249;GO:0044260;GO:0044267;GO:0044424;GO:0044444;GO:0044464;GO:0071704;GO:0071944;GO:1901576	Cytoplasmic		control_42C;lowpH_42C;oxidative_42C;agar_42C;25C_42C;oxidative_control;agar_control;25C_control;agar_lowpH;25C_lowpH;agar_oxidative;25C_oxidative
-8.29948	8.29948	-6.60165	-5.82453	5.59678	6.91661		+	Cluster 403		16	59	24.046	0	59.368	1109400000	142	8.17259	0	AFT93231.1	stringent starvation protein A [Francisella tularensis subsp. holarctica FSC200]	FTS_1566	sspA		Posttranslational modification, protein turnover, chaperones	O	COG0625	GstA	Glutathione S-transferase		sspA, stringent starvation protein A	K03599	Stringent starvation protein a	GO:0006950;GO:0007154;GO:0008150;GO:0009267;GO:0009605;GO:0009987;GO:0009991;GO:0031667;GO:0031668;GO:0031669;GO:0033554;GO:0042594;GO:0044699;GO:0044763;GO:0050896;GO:0051716;GO:0071496	Cytoplasmic		lowpH_42C;oxidative_42C;control_42C;25C_42C;agar_42C;oxidative_lowpH;control_lowpH;25C_lowpH;agar_lowpH;25C_oxidative;agar_oxidative;25C_control;agar_control;agar_25C
-7.49725	7.49725	-5.16239	-4.40692	5.64604	6.87836		+	Cluster 403		3	25.2	16.481	0	16.277	143920000	36	7.49345	0.00370621	AFT92628.1	hypothetical protein FTS_0760 [Francisella tularensis subsp. holarctica FSC200]	FTS_0760			Lipid transport and metabolism	I							Cyclase dehydrase	GO:0003674;GO:0005488;GO:0006417;GO:0006446;GO:0008150;GO:0009889;GO:0009890;GO:0009892;GO:0010468;GO:0010556;GO:0010558;GO:0010605;GO:0010608;GO:0017148;GO:0019222;GO:0031323;GO:0031324;GO:0031326;GO:0031327;GO:0032268;GO:0032269;GO:0043021;GO:0043023;GO:0045947;GO:0048519;GO:0048523;GO:0050789;GO:0050794;GO:0051246;GO:0051248;GO:0060255;GO:0065007;GO:0080090;GO:2000112;GO:2000113	Cytoplasmic		control_42C;oxidative_42C;agar_42C;25C_42C;control_lowpH;oxidative_lowpH;agar_lowpH;25C_lowpH;agar_control;25C_control;agar_oxidative;25C_oxidative;25C_agar
-6.99427	6.89468	-3.98362	-5.28762	6.61209	6.99427		+	Cluster 403		11	81.1	14.411	0	85.73	2970400000	212	7.67798	0.00221212	AFT92237.1	30S ribosomal protein S8 [Francisella tularensis subsp. holarctica FSC200]	FTS_0247	rpsH		Translation, ribosomal structure and biogenesis	J	COG0096	RpsH	Ribosomal protein S8	Ribosome	RP-S8, small subunit ribosomal protein S8	K02994	One of the primary rRNA binding proteins, it binds directly to 16S rRNA central domain where it helps coordinate assembly of the platform of the 30S subunit (By similarity)	GO:0003674;GO:0003735;GO:0005198;GO:0005575;GO:0005622;GO:0005623;GO:0005737;GO:0005829;GO:0005840;GO:0006412;GO:0008150;GO:0008152;GO:0009058;GO:0009059;GO:0009987;GO:0010467;GO:0015935;GO:0019538;GO:0022626;GO:0022627;GO:0030529;GO:0032991;GO:0034645;GO:0040007;GO:0043170;GO:0043226;GO:0043228;GO:0043229;GO:0043232;GO:0044237;GO:0044238;GO:0044249;GO:0044260;GO:0044267;GO:0044391;GO:0044422;GO:…	Cytoplasmic		control_lowpH;oxidative_lowpH;agar_lowpH;25C_lowpH;control_42C;oxidative_42C;agar_42C;25C_42C;agar_control;25C_control;agar_oxidative;25C_oxidative;25C_agar
-7.74222	8.32004	5.12073	-8.41388	7.07132	8.41388		+	Cluster 401		9	65.5	15.937	0	110.81	2366000000	180	9.26364	0	AFT92938.1	50S ribosomal protein L13 [Francisella tularensis subsp. holarctica FSC200]	FTS_1163	rplM		Translation, ribosomal structure and biogenesis	J	COG0102	RplM	Ribosomal protein L13	Ribosome	RP-L13, large subunit ribosomal protein L13	K02871	This protein is one of the early assembly proteins of the 50S ribosomal subunit, although it is not seen to bind rRNA by itself. It is important during the early stages of 50S assembly (By similarity)	GO:0003674;GO:0003735;GO:0005198;GO:0005575;GO:0005618;GO:0005622;GO:0005623;GO:0005737;GO:0005829;GO:0005886;GO:0006412;GO:0008150;GO:0008152;GO:0009058;GO:0009059;GO:0009987;GO:0010467;GO:0016020;GO:0019538;GO:0030312;GO:0034645;GO:0040007;GO:0043170;GO:0044237;GO:0044238;GO:0044249;GO:0044260;GO:0044267;GO:0044424;GO:0044444;GO:0044464;GO:0071704;GO:0071944;GO:1901576	Cytoplasmic		lowpH_control;42C_control;oxidative_control;25C_control;agar_control;42C_lowpH;oxidative_lowpH;25C_lowpH;agar_lowpH;25C_42C;agar_42C;agar_oxidative;agar_25C
-4.69756	7.34148	4.38777	-7.47639	6.67482	7.47639		+	Cluster 401		14	58.6	26.43	0	188.25	4865500000	323	7.76906	0	AFT93059.1	transcriptional regulator, IclR family [Francisella tularensis subsp. holarctica FSC200]	FTS_1332			Transcription	K							Transcriptional regulator (IclR family)		Cytoplasmic		lowpH_42C;oxidative_42C;25C_42C;agar_42C;25C_control;agar_control;25C_lowpH;agar_lowpH;25C_oxidative;agar_oxidative;agar_25C
-7.70868	6.25931	5.45924	-4.76098	7.70868	7.47481		+	Cluster 401		8	55.1	14.844	0	68.627	781740000	63	7.77318	0.000853333	AFT92969.1	transcriptional regulator [Francisella tularensis subsp. holarctica FSC200]	FTS_1206			Transcription	K							Transcriptional regulator, BadM Rrf2 family		Unknown		control_42C;lowpH_42C;oxidative_42C;agar_42C;25C_42C;oxidative_control;agar_control;25C_control;oxidative_lowpH;agar_lowpH;25C_lowpH;agar_oxidative;25C_oxidative;25C_agar
-6.57372	6.10772	3.75949	-4.53551	4.76584	6.57372		+	Cluster 401		6	21.1	29.685	0	20.835	401200000	66	6.64677	0.0088412	AFT92558.1	pantoate-beta-alanine ligase [Francisella tularensis subsp. holarctica FSC200]	FTS_0674	panC		Coenzyme transport and metabolism	H	COG0414	PanC	Panthothenate synthetase	beta-Alanine metabolism;Biosynthesis of secondary metabolites;Metabolic pathways;Pantothenate and CoA biosynthesis	panC, pantoate--beta-alanine ligase [EC:6.3.2.1]	K01918	Catalyzes the condensation of pantoate with beta-alanine in an ATP-dependent reaction via a pantoyl-adenylate intermediate (By similarity)	GO:0003674;GO:0003824;GO:0004592;GO:0005575;GO:0005622;GO:0005623;GO:0005737;GO:0005829;GO:0006082;GO:0006520;GO:0006573;GO:0006575;GO:0006732;GO:0006766;GO:0006767;GO:0006807;GO:0008150;GO:0008152;GO:0008652;GO:0009058;GO:0009081;GO:0009108;GO:0009110;GO:0009987;GO:0015939;GO:0015940;GO:0016053;GO:0016874;GO:0016879;GO:0016881;GO:0019752;GO:0033317;GO:0034641;GO:0042364;GO:0042398;GO:0043436;GO:…	Cytoplasmic		control_42C;lowpH_42C;25C_42C;agar_42C;lowpH_oxidative;25C_oxidative;agar_oxidative;25C_control;agar_control;25C_lowpH;agar_lowpH;agar_25C
-5.59528	5.03054	3.05221	-4.24216	5.3819	5.59528		+	Cluster 401		14	45.3	47.425	0	51.988	498320000	81	6.17297	0	AFT93406.1	diaminopimelate decarboxylase [Francisella tularensis subsp. holarctica FSC200]	FTS_1791	lysA2		Amino acid transport and metabolism	E	COG0019	LysA	Diaminopimelate decarboxylase	Biosynthesis of amino acids;Biosynthesis of antibiotics;Biosynthesis of secondary metabolites;Lysine biosynthesis;Metabolic pathways;Microbial metabolism in diverse environments	lysA, diaminopimelate decarboxylase [EC:4.1.1.20]	K01586	Pyridoxal-dependent decarboxylase, pyridoxal binding domain		Cytoplasmic		lowpH_42C;25C_42C;agar_42C;25C_control;agar_control;25C_oxidative;agar_oxidative;25C_lowpH;agar_lowpH;agar_25C
-9.25014	9.25014	-7.04769	6.00266	8.57698	8.31426		+	Cluster -260		8	58.3	8.3787	0	82.6	9272800000	311	9.48749	0	AFT92814.1	30S ribosomal protein S18 [Francisella tularensis subsp. holarctica FSC200]	FTS_1001	rpsR		Translation, ribosomal structure and biogenesis	J	COG0238	RpsR	Ribosomal protein S18	Ribosome	RP-S18, small subunit ribosomal protein S18	K02963	Binds as a heterodimer with protein S6 to the central domain of the 16S rRNA, where it helps stabilize the platform of the 30S subunit (By similarity)	GO:0003674;GO:0003735;GO:0005198;GO:0006412;GO:0008150;GO:0008152;GO:0009058;GO:0009059;GO:0009987;GO:0010467;GO:0019538;GO:0034645;GO:0043170;GO:0044237;GO:0044238;GO:0044249;GO:0044260;GO:0044267;GO:0071704;GO:1901576	Cytoplasmic		oxidative_control;lowpH_control;25C_control;agar_control;lowpH_42C;25C_42C;agar_42C;lowpH_oxidative;25C_oxidative;agar_oxidative;agar_lowpH;agar_25C
6.86392	6.75339	-6.04471	-4.99403	-4.89395	-6.86392		+	Cluster 435		39	51.4	92.015	0	323.31	8808600000	632	7.60869	0.0224729	AFT93298.1	cell division protein [Francisella tularensis subsp. holarctica FSC200]	FTS_1660	ftsK		Cell cycle control, cell division, chromosome partitioning	D	COG1674	FtsK	DNA segregation ATPase FtsK/SpoIIIE and related proteins		ftsK, DNA segregation ATPase FtsK/SpoIIIE, S-DNA-T family	K03466	Essential cell division protein that coordinates cell division and chromosome segregation. The N-terminus is involved in assembly of the cell-division machinery. The C-terminus functions as a DNA motor that moves dsDNA in an ATP-dependent manner towards the dif recombination site, which is located within the replication terminus region. Translocation stops specifically at Xer-dif sites, where Fts…	GO:0000166;GO:0000910;GO:0000920;GO:0001882;GO:0001883;GO:0003674;GO:0003676;GO:0003677;GO:0003824;GO:0005488;GO:0005524;GO:0005575;GO:0005623;GO:0005886;GO:0005887;GO:0006139;GO:0006152;GO:0006163;GO:0006195;GO:0006200;GO:0006355;GO:0006725;GO:0006753;GO:0006793;GO:0006796;GO:0006807;GO:0006950;GO:0006970;GO:0007049;GO:0007059;GO:0008094;GO:0008150;GO:0008152;GO:0009056;GO:0009116;GO:0009117;GO:…	CytoplasmicMembrane		oxidative_42C;control_42C;agar_42C;25C_42C;oxidative_lowpH;control_lowpH;agar_lowpH;25C_lowpH;agar_oxidative;25C_oxidative;agar_control;25C_control;25C_agar
6.5031	5.03133	-5.23203	-3.70629	-5.39794	-6.5031		+	Cluster 435		23	63	40.933	0	265.48	3631700000	314	6.59657	0.0162738	AFT92714.1	DNA/RNA endonuclease G [Francisella tularensis subsp. holarctica FSC200]	FTS_0869			Nucleotide transport and metabolism	F	COG1864	NUC1	DNA/RNA endonuclease G, NUC1		ENDOG, endonuclease G, mitochondrial	K01173	DNA RNA endonuclease G		Extracellular		oxidative_lowpH;control_lowpH;agar_lowpH;25C_lowpH;agar_42C;25C_42C;agar_oxidative;25C_oxidative;agar_control;25C_control
6.99555	5.08445	-5.3067	-6.14819	-4.57738	-6.99555		+	Cluster 435		17	48.8	41.541	0	106.55	743690000	100	6.97668	0.00276259	AFT93196.1	succinyl-CoA synthetase subunit beta [Francisella tularensis subsp. holarctica FSC200]	FTS_1517	sucC		Energy production and conversion	C	COG0045	SucC	Succinyl-CoA synthetase, beta subunit	Biosynthesis of antibiotics;Biosynthesis of secondary metabolites;C5-Branched dibasic acid metabolism;Carbon metabolism;Citrate cycle (TCA cycle);Metabolic pathways;Microbial metabolism in diverse environments;Propanoate metabolism	sucC, succinyl-CoA synthetase beta subunit [EC:6.2.1.5]	K01903	succinyl-CoA synthetase subunit beta	GO:0003674;GO:0003824;GO:0004774;GO:0004775;GO:0005575;GO:0005618;GO:0005622;GO:0005623;GO:0005737;GO:0005829;GO:0006091;GO:0006099;GO:0008150;GO:0008152;GO:0009060;GO:0009987;GO:0015980;GO:0016405;GO:0016874;GO:0016877;GO:0016878;GO:0030312;GO:0040007;GO:0044237;GO:0044238;GO:0044424;GO:0044444;GO:0044464;GO:0044710;GO:0045333;GO:0055114;GO:0071944	Cytoplasmic		control_42C;agar_42C;25C_42C;control_lowpH;agar_lowpH;25C_lowpH;control_oxidative;agar_oxidative;25C_oxidative;agar_control;25C_control
5.2124	4.17933	-5.08779	-5.2124	-3.4644	-4.95766		+	Cluster 435		30	38.6	96.046	0	173.55	962290000	143	6.01205	0.00591469	AFT92111.1;AFT92783.1	chaperone clpB [Francisella tularensis subsp. holarctica FSC200]	FTS_0084	clpB		Posttranslational modification, protein turnover, chaperones	O	COG0542	ClpA	ATP-dependent Clp protease ATP-binding subunit ClpA		clpB, ATP-dependent Clp protease ATP-binding subunit ClpB	K03695	Part of a stress-induced multi-chaperone system, it is involved in the recovery of the cell from heat-induced damage, in cooperation with DnaK, DnaJ and GrpE. Acts before DnaK, in the processing of protein aggregates. Protein binding stimulates the ATPase activity	GO:0000166;GO:0001882;GO:0001883;GO:0003674;GO:0003824;GO:0005488;GO:0005515;GO:0005524;GO:0005575;GO:0005618;GO:0005622;GO:0005623;GO:0005737;GO:0005829;GO:0005886;GO:0006139;GO:0006152;GO:0006163;GO:0006195;GO:0006200;GO:0006508;GO:0006725;GO:0006753;GO:0006793;GO:0006796;GO:0006807;GO:0006950;GO:0006986;GO:0008150;GO:0008152;GO:0008233;GO:0009056;GO:0009116;GO:0009117;GO:0009119;GO:0009123;GO:…	Cytoplasmic		oxidative_control;25C_control;agar_control;25C_lowpH;agar_lowpH;25C_42C;agar_42C;25C_oxidative;agar_oxidative
6.196	3.5875	-5.20894	-5.74267	-4.34234	-6.196		+	Cluster 435		22	52.2	44.513	0	323.31	8300400000	438	6.26192	0.0151321	AFT92542.1	hypothetical protein FTS_0655 [Francisella tularensis subsp. holarctica FSC200]	FTS_0655													Cytoplasmic		control_lowpH;oxidative_lowpH;25C_lowpH;agar_lowpH;oxidative_42C;25C_42C;agar_42C;25C_control;agar_control;25C_oxidative;agar_oxidative;agar_25C
6.34767	4.15817	-6.34767	-6.21957	-5.32818	-3.559		+	Cluster 435		25	54.3	63.064	0	153.05	956190000	129	6.65786	0	AFT92486.1	long chain fatty acid CoA ligase [Francisella tularensis subsp. holarctica FSC200]	FTS_0585	fadD		Lipid transport and metabolism;Secondary metabolites biosynthesis, transport and catabolism	I;Q	COG0318;COG1022	CaiC;FAA1	Acyl-CoA synthetase (AMP-forming)/AMP-acid ligase II, Long-chain acyl-CoA synthetase (AMP-forming)	Fatty acid metabolism;Galactose metabolism;Metabolic pathways;Quorum sensing	ACSL, long-chain acyl-CoA synthetase [EC:6.2.1.3]	K01897	Long-chain-fatty-acid-CoA ligase	GO:0000166;GO:0001676;GO:0001882;GO:0001883;GO:0003674;GO:0003824;GO:0004467;GO:0005488;GO:0005504;GO:0005524;GO:0005575;GO:0005622;GO:0005623;GO:0005737;GO:0005829;GO:0005886;GO:0006082;GO:0006629;GO:0006631;GO:0006635;GO:0006637;GO:0006644;GO:0006732;GO:0006793;GO:0006796;GO:0008150;GO:0008152;GO:0008289;GO:0008610;GO:0008654;GO:0009056;GO:0009058;GO:0009062;GO:0009898;GO:0009987;GO:0015645;GO:…	CytoplasmicMembrane		control_42C;oxidative_42C;25C_42C;agar_42C;oxidative_lowpH;25C_lowpH;agar_lowpH;25C_control;agar_control;25C_oxidative;agar_oxidative
5.70094	5.91119	-5.91119	-4.90267	-3.62964	-4.1052		+	Cluster 435		14	47.1	49.511	0	122.1	1594600000	152	6.47637	0.00116505	AFT93174.1	phosphopyruvate hydratase [Francisella tularensis subsp. holarctica FSC200]	FTS_1491	eno		Carbohydrate transport and metabolism	G	COG0148	Eno	Enolase	Biosynthesis of amino acids;Biosynthesis of antibiotics;Biosynthesis of secondary metabolites;Carbon metabolism;Glycolysis / Gluconeogenesis;Metabolic pathways;Methane metabolism;Microbial metabolism in diverse environments;RNA degradation	ENO, enolase [EC:4.2.1.11]	K01689	Catalyzes the reversible conversion of 2- phosphoglycerate into phosphoenolpyruvate. It is essential for the degradation of carbohydrates via glycolysis (By similarity)	GO:0000287;GO:0003674;GO:0003824;GO:0004634;GO:0005488;GO:0005575;GO:0005576;GO:0005622;GO:0005623;GO:0005737;GO:0005829;GO:0005856;GO:0005975;GO:0005996;GO:0006006;GO:0006007;GO:0006091;GO:0006096;GO:0008150;GO:0008152;GO:0009056;GO:0009986;GO:0009987;GO:0016020;GO:0016052;GO:0016829;GO:0016835;GO:0016836;GO:0019318;GO:0019320;GO:0043167;GO:0043169;GO:0043226;GO:0043228;GO:0043229;GO:0043232;GO:…	Cytoplasmic		agar_42C;25C_42C;agar_lowpH;25C_lowpH;agar_control;25C_control;agar_oxidative;25C_oxidative
6.4001	5.28144	-6.4001	-5.4124	-4.7786	-4.82749		+	Cluster 435		21	52.3	55.362	0	146.02	819380000	104	6.65999	0	AFT92917.1;AFT92129.1	hypothetical protein FTS_1134 [Francisella tularensis subsp. holarctica FSC200];hypothetical protein FTS_0106 [Francisella tularensis subsp. holarctica FSC200]	FTS_1134;FTS_0106													Unknown		lowpH_42C;oxidative_42C;agar_42C;25C_42C;lowpH_control;oxidative_control;agar_control;25C_control;25C_lowpH;25C_oxidative;25C_agar
5.83242	6.25674	-6.25674	-5.86314	-4.804	-5.26053		+	Cluster 435		32	44	100.62	0	213.56	1751200000	218	7.13469	0.00113131	AFT92484.1	fusion product of 3-hydroxacyl-CoA dehydrogenase and acyl-CoA-binding protein [Francisella tularensis subsp. holarctica FSC200]	FTS_0583	fadB		Lipid transport and metabolism	I	COG1250;COG1024	FadB;CaiD	3-hydroxyacyl-CoA dehydrogenase, Enoyl-CoA hydratase/carnithine racemase	Benzoate degradation;Butanoate metabolism;Carbon metabolism;Fatty acid metabolism;Galactose metabolism;Metabolic pathways;Microbial metabolism in diverse environments	fadN, 3-hydroxyacyl-CoA dehydrogenase [EC:1.1.1.35]	K07516	Catalyzes the formation of a hydroxyacyl-CoA by addition of water on enoyl-CoA. Also exhibits 3-hydroxyacyl-CoA epimerase and 3-hydroxyacyl-CoA dehydrogenase activities (By similarity)		Cytoplasmic		oxidative_42C;control_42C;lowpH_42C;25C_42C;agar_42C;lowpH_oxidative;25C_oxidative;agar_oxidative;lowpH_control;25C_control;agar_control;25C_lowpH;agar_lowpH;agar_25C
5.93267	6.34928	-6.34928	-5.86038	-4.46684	-4.79988		+	Cluster 435		5	41.3	12.484	0	47.094	187370000	22	7.06546	0	AFT92731.1	host factor I for bacteriophage Q beta replication [Francisella tularensis subsp. holarctica FSC200]	FTS_0889	hfq		Signal transduction mechanisms	T	COG1923	Hfq	sRNA-binding regulator protein Hfq	Quorum sensing;RNA degradation	hfq, host factor-I protein	K03666	RNA chaperone that binds small regulatory RNA (sRNAs) and mRNAs to facilitate mRNA translational regulation in response to envelope stress, environmental stress and changes in metabolite concentrations. Also binds with high specificity to tRNAs (By similarity)	GO:0003674;GO:0003676;GO:0003677;GO:0003681;GO:0003723;GO:0005488;GO:0006139;GO:0006378;GO:0006396;GO:0006397;GO:0006417;GO:0006725;GO:0006807;GO:0008150;GO:0008152;GO:0009889;GO:0009890;GO:0009891;GO:0009892;GO:0009893;GO:0009987;GO:0010467;GO:0010468;GO:0010556;GO:0010557;GO:0010558;GO:0010604;GO:0010605;GO:0010608;GO:0010629;GO:0016043;GO:0016070;GO:0016071;GO:0016246;GO:0016441;GO:0016458;GO:…	Cytoplasmic		control_oxidative;25C_oxidative;agar_oxidative;control_lowpH;25C_lowpH;agar_lowpH;control_42C;25C_42C;agar_42C;25C_control;agar_control;agar_25C
3.34752	6.03354	-6.03354	-5.78769	-4.69232	-4.23767		+	Cluster 435		12	49.4	34.909	0	130.04	486170000	71	6.10176	0.00209836	AFT92761.1	ribose-phosphate pyrophosphokinase [Francisella tularensis subsp. holarctica FSC200]	FTS_0930	prsA		Nucleotide transport and metabolism;Amino acid transport and metabolism	E;F	COG0462	PrsA	Phosphoribosylpyrophosphate synthetase	Biosynthesis of amino acids;Biosynthesis of antibiotics;Biosynthesis of secondary metabolites;Carbon metabolism;Metabolic pathways;Microbial metabolism in diverse environments;Pentose phosphate pathway;Purine metabolism	PRPS, ribose-phosphate pyrophosphokinase [EC:2.7.6.1]	K00948	Phosphoribosyl pyrophosphate synthase	GO:0000105;GO:0000162;GO:0003674;GO:0003824;GO:0004749;GO:0005575;GO:0005622;GO:0005623;GO:0005737;GO:0006082;GO:0006139;GO:0006163;GO:0006164;GO:0006188;GO:0006189;GO:0006213;GO:0006220;GO:0006221;GO:0006222;GO:0006520;GO:0006547;GO:0006568;GO:0006576;GO:0006586;GO:0006725;GO:0006753;GO:0006793;GO:0006796;GO:0006807;GO:0008150;GO:0008152;GO:0008652;GO:0009058;GO:0009072;GO:0009073;GO:0009116;GO:…	Cytoplasmic		lowpH_42C;control_42C;agar_42C;oxidative_42C;25C_42C;25C_lowpH;25C_control;25C_agar;25C_oxidative
3.57733	6.63478	-6.63478	-6.25094	-5.46935	-5.918		+	Cluster 435		4	45	12.311	0	26.035	172940000	20	6.78144	0.00522167	AFT93367.1	glutaredoxin-related protein [Francisella tularensis subsp. holarctica FSC200]	FTS_1748			Posttranslational modification, protein turnover, chaperones	O	COG0278	GrxD	Glutaredoxin-related protein		grxD, monothiol glutaredoxin	K07390	Glutaredoxin	GO:0003674;GO:0005488;GO:0005575;GO:0005622;GO:0005623;GO:0005737;GO:0044424;GO:0044464;GO:0051536;GO:0051537;GO:0051540	Cytoplasmic		control_42C;agar_42C;oxidative_42C;25C_42C;agar_lowpH;oxidative_lowpH;25C_lowpH;oxidative_control;25C_control;oxidative_agar;25C_agar;25C_oxidative
3.65011	6.14147	-5.59444	-4.49904	-5.63625	-6.14147		+	Cluster 435		9	62.1	19.668	0	67.967	994620000	62	6.33389	0.0190745	AFT92806.1	AhpC/TSA family protein [Francisella tularensis subsp. holarctica FSC200]	FTS_0990			Posttranslational modification, protein turnover, chaperones	O							Peroxiredoxin		Unknown		agar_42C;control_42C;oxidative_42C;25C_42C;agar_lowpH;control_lowpH;oxidative_lowpH;25C_lowpH;25C_agar;25C_control;25C_oxidative
4.47947	2.21598	-4.47947	-2.66792	-3.33152	-4.15483		+	Cluster 435		19	43.7	46.401	0	103.67	915220000	125	4.51229	0.0040625	AFT92911.1;AFT92123.1	intracellular growth locus protein D [Francisella tularensis subsp. holarctica FSC200];intracellular growth locus protein D [Francisella tularensis subsp. holarctica FSC200]	FTS_1128;FTS_0100	iglD2;iglD1												Cytoplasmic		agar_lowpH;control_lowpH;oxidative_lowpH;25C_lowpH;agar_42C;control_42C;oxidative_42C;25C_42C;25C_agar;25C_control;25C_oxidative
4.53712	4.57998	-2.75394	-4.57998	-2.50331	-4.01856		+	Cluster 435		13	31.8	51.776	0	89.946	458280000	54	5.2954	0.00156522	AFT92905.1	pyruvate kinase [Francisella tularensis subsp. holarctica FSC200]	FTS_1119	pyk		Carbohydrate transport and metabolism	G	COG0469	PykF	Pyruvate kinase	Biosynthesis of amino acids;Biosynthesis of antibiotics;Biosynthesis of secondary metabolites;Carbon metabolism;Glycolysis / Gluconeogenesis;Metabolic pathways;Microbial metabolism in diverse environments;Purine metabolism;Pyruvate metabolism	PK, pyruvate kinase [EC:2.7.1.40]	K00873	Pyruvate kinase	GO:0003674;GO:0003824;GO:0003840;GO:0004743;GO:0005575;GO:0005622;GO:0005623;GO:0005737;GO:0005829;GO:0005975;GO:0005996;GO:0006006;GO:0006007;GO:0006082;GO:0006090;GO:0006091;GO:0006094;GO:0006096;GO:0006139;GO:0006163;GO:0006725;GO:0006753;GO:0006793;GO:0006796;GO:0006807;GO:0008150;GO:0008152;GO:0009056;GO:0009058;GO:0009117;GO:0009987;GO:0015977;GO:0016051;GO:0016052;GO:0016301;GO:0016310;GO:…	Cytoplasmic		agar_lowpH;control_lowpH;oxidative_lowpH;25C_lowpH;control_42C;oxidative_42C;25C_42C;oxidative_agar;25C_agar;25C_control;25C_oxidative
4.70447	4.83404	-4.83404	-2.77549	-4.02334	-3.87533		+	Cluster 435		10	45	26.865	0	34.682	275460000	40	5.59525	0	AFT93128.1	purine nucleoside phosphorylase [Francisella tularensis subsp. holarctica FSC200]	FTS_1432	deoD		Nucleotide transport and metabolism	F	COG0813	DeoD	Purine-nucleoside phosphorylase	Biosynthesis of secondary metabolites;Metabolic pathways;Nicotinate and nicotinamide metabolism;Purine metabolism;Pyrimidine metabolism	deoD, purine-nucleoside phosphorylase [EC:2.4.2.1]	K03784	purine nucleoside phosphorylase DeoD-type	GO:0003674;GO:0003824;GO:0004731;GO:0005575;GO:0005622;GO:0005623;GO:0005737;GO:0005829;GO:0006139;GO:0006152;GO:0006725;GO:0006807;GO:0006950;GO:0006974;GO:0008150;GO:0008152;GO:0009056;GO:0009116;GO:0009164;GO:0009987;GO:0015949;GO:0016020;GO:0016740;GO:0016757;GO:0016763;GO:0019439;GO:0019686;GO:0033554;GO:0034641;GO:0034655;GO:0042278;GO:0044237;GO:0044238;GO:0044248;GO:0044270;GO:0044281;GO:…	Cytoplasmic		42C_lowpH;control_lowpH;agar_lowpH;oxidative_lowpH;25C_lowpH;oxidative_42C;25C_42C;25C_control;25C_agar;25C_oxidative
5.2955	4.25816	-5.2955	-3.56333	-3.36551	-2.88366		+	Cluster 435		9	38.3	30.818	0	45.651	397440000	59	5.20601	5.6338e-05	AFT93190.1	pyridoxal biosynthesis lyase PdxS [Francisella tularensis subsp. holarctica FSC200]	FTS_1510			Coenzyme transport and metabolism	H	COG0214	PdxS	Pyridoxal biosynthesis lyase PdxS	Vitamin B6 metabolism	pdxS, pyridoxal 5'-phosphate synthase pdxS subunit [EC:4.3.3.6]	K06215	Involved in the production of pyridoxal phosphate, probably by incorporating ammonia into the pyridine ring (By similarity)	GO:0003674;GO:0003824;GO:0005575;GO:0005623;GO:0005886;GO:0006732;GO:0006793;GO:0006796;GO:0008150;GO:0008152;GO:0009058;GO:0009108;GO:0009987;GO:0016020;GO:0016829;GO:0016840;GO:0016843;GO:0019637;GO:0040007;GO:0042822;GO:0042823;GO:0044237;GO:0044249;GO:0044464;GO:0051186;GO:0051188;GO:0071704;GO:0071944;GO:0090407;GO:1901576	Cytoplasmic		agar_lowpH;control_lowpH;42C_lowpH;oxidative_lowpH;25C_lowpH;oxidative_agar;25C_agar;oxidative_control;25C_control;oxidative_42C;25C_42C
4.81831	4.48259	-4.80713	-4.81831	-3.88081	-3.30082		+	Cluster 435		17	60.7	44.804	0	69.93	509770000	77	5.78849	0.00219549	AFT93451.1	cell division protein FtsA [Francisella tularensis subsp. holarctica FSC200]	FTS_1858	ftsA		Cell cycle control, cell division, chromosome partitioning	D	COG0849	FtsA	Cell division ATPase FtsA		ftsA, cell division protein FtsA	K03590	This protein may be involved in anomalous filament growth. May be a component of the septum (By similarity)	GO:0000166;GO:0000910;GO:0001882;GO:0001883;GO:0003674;GO:0005488;GO:0005515;GO:0005524;GO:0005575;GO:0005623;GO:0005886;GO:0007049;GO:0008150;GO:0009898;GO:0009987;GO:0016020;GO:0017076;GO:0022402;GO:0030554;GO:0032153;GO:0032155;GO:0032549;GO:0032550;GO:0032553;GO:0032555;GO:0032559;GO:0035639;GO:0036094;GO:0042802;GO:0043167;GO:0043168;GO:0044425;GO:0044459;GO:0044464;GO:0044699;GO:0044763;GO:…	Cytoplasmic		agar_42C;oxidative_42C;25C_42C;agar_lowpH;oxidative_lowpH;25C_lowpH;agar_control;oxidative_control;25C_control;25C_agar;25C_oxidative
3.58536	4.80369	-4.62542	-4.80369	-2.07352	-2.79815		+	Cluster 435		40	58	87.34	0	323.31	4190000000	417	5.14664	0.0243017	AFT93396.1	NADH dehydrogenase subunit G [Francisella tularensis subsp. holarctica FSC200]	FTS_1781	nuoG		Energy production and conversion	C	COG1034	NuoG	NADH dehydrogenase/NADH:ubiquinone oxidoreductase 75 kD subunit (chain G)	Metabolic pathways;Oxidative phosphorylation	nuoG, NADH-quinone oxidoreductase subunit G [EC:1.6.5.3]	K00336	NADH dehydrogenase subunit G	GO:0003674;GO:0003824;GO:0003954;GO:0005575;GO:0005623;GO:0005886;GO:0006091;GO:0008137;GO:0008150;GO:0008152;GO:0009987;GO:0015980;GO:0016020;GO:0016491;GO:0016651;GO:0016655;GO:0030964;GO:0032991;GO:0043234;GO:0044237;GO:0044425;GO:0044464;GO:0044710;GO:0045271;GO:0045333;GO:0050136;GO:0055114;GO:0070469;GO:0071944	Cytoplasmic		42C_lowpH;agar_lowpH;control_lowpH;oxidative_lowpH;25C_lowpH;agar_42C;control_42C;oxidative_42C;25C_42C;25C_agar;25C_control;25C_oxidative
5.03382	5.28683	-5.28683	-3.93992	-2.66493	-4.31503		+	Cluster 435		18	52.2	42.595	0	133.7	1544800000	183	5.86204	0.0163152	AFT92397.1	BNR/Asp-box repeat-containing protein [Francisella tularensis subsp. holarctica FSC200]	FTS_0466			Carbohydrate transport and metabolism	G							BNR Asp-box repeat protein		CytoplasmicMembrane		agar_lowpH;oxidative_lowpH;control_lowpH;25C_lowpH;oxidative_42C;control_42C;25C_42C;25C_agar;25C_oxidative;25C_control
4.31069	4.8291	-4.52082	-4.8291	-2.8646	-4.47541		+	Cluster 435		5	46.7	12.023	0	17.957	142180000	37	5.72174	0.0012844	AFT92509.1	thioredoxin [Francisella tularensis subsp. holarctica FSC200]	FTS_0610	trx1		Posttranslational modification, protein turnover, chaperones	O	COG0526	TrxA	Thiol-disulfide isomerase or thioredoxin		trxA, thioredoxin 1	K03671	Thioredoxin	GO:0003674;GO:0003824;GO:0008150;GO:0008152;GO:0009987;GO:0015035;GO:0015036;GO:0016491;GO:0016667;GO:0019725;GO:0042592;GO:0044699;GO:0044710;GO:0044763;GO:0045454;GO:0050789;GO:0050794;GO:0055114;GO:0065007;GO:0065008	Cytoplasmic		oxidative_lowpH;agar_lowpH;25C_lowpH;25C_42C;25C_control;25C_oxidative;25C_agar
9.12474	9.75135	-9.75135	-7.69866	-6.5818	-7.83721		+	Cluster 435		9	62.9	16.087	0	72.809	308270000	43	9.94311	0	AFT92815.1	50S ribosomal protein L9 [Francisella tularensis subsp. holarctica FSC200]	FTS_1002	rplI		Translation, ribosomal structure and biogenesis	J	COG0359	RplI	Ribosomal protein L9	Ribosome	RP-L9, large subunit ribosomal protein L9	K02939	Binds to the 23S rRNA (By similarity)	GO:0003674;GO:0003735;GO:0005198;GO:0005575;GO:0005618;GO:0005622;GO:0005623;GO:0005737;GO:0005829;GO:0005886;GO:0006412;GO:0008150;GO:0008152;GO:0009058;GO:0009059;GO:0009987;GO:0010467;GO:0016020;GO:0019538;GO:0030312;GO:0034645;GO:0043170;GO:0044237;GO:0044238;GO:0044249;GO:0044260;GO:0044267;GO:0044424;GO:0044444;GO:0044464;GO:0071704;GO:0071944;GO:1901576	Cytoplasmic		control_lowpH;oxidative_lowpH;agar_lowpH;25C_lowpH;agar_42C;25C_42C;agar_control;25C_control;agar_oxidative;25C_oxidative;25C_agar
9.72925	8.36825	-9.72925	-8.61481	-7.05952	-6.99795		+	Cluster 435		7	55.8	14.736	0	66.159	690780000	63	9.78067	0	AFT92937.1	30S ribosomal protein S9 [Francisella tularensis subsp. holarctica FSC200]	FTS_1162	rpsI		Translation, ribosomal structure and biogenesis	J	COG0103	RpsI	Ribosomal protein S9	Ribosome	RP-S9, small subunit ribosomal protein S9	K02996	30S ribosomal protein S9	GO:0003674;GO:0003735;GO:0005198;GO:0005575;GO:0005623;GO:0005886;GO:0006412;GO:0008150;GO:0008152;GO:0009058;GO:0009059;GO:0009987;GO:0010467;GO:0016020;GO:0019538;GO:0034645;GO:0043170;GO:0044237;GO:0044238;GO:0044249;GO:0044260;GO:0044267;GO:0044464;GO:0071704;GO:0071944;GO:1901576	Cytoplasmic		control_lowpH;oxidative_lowpH;agar_lowpH;25C_lowpH;control_42C;oxidative_42C;agar_42C;25C_42C;25C_control;25C_oxidative;25C_agar
7.13522	9.32989	-9.32989	-8.98525	-6.43109	-6.72604		+	Cluster 435		15	67.6	28.124	0	176.08	1951600000	161	9.46342	0	AFT92456.1	UDP-N-acetylglucosamine acyltransferase [Francisella tularensis subsp. holarctica FSC200]	FTS_0541	lpxA		Cell wall/membrane/envelope biogenesis	M	COG1043	LpxA	Acyl-[acyl carrier protein]--UDP-N-acetylglucosamine O-acyltransferase	Cationic antimicrobial peptide (CAMP) resistance;Lipopolysaccharide biosynthesis;Metabolic pathways	lpxA, UDP-N-acetylglucosamine acyltransferase [EC:2.3.1.129]	K00677	Involved in the biosynthesis of lipid A, a phosphorylated glycolipid that anchors the lipopolysaccharide to the outer membrane of the cell (By similarity)	GO:0003674;GO:0003824;GO:0005575;GO:0005622;GO:0005623;GO:0005737;GO:0005975;GO:0006629;GO:0006643;GO:0006644;GO:0006664;GO:0006793;GO:0006796;GO:0008150;GO:0008152;GO:0008374;GO:0008610;GO:0008654;GO:0008780;GO:0009058;GO:0009245;GO:0009247;GO:0009311;GO:0009312;GO:0009987;GO:0016051;GO:0016740;GO:0016746;GO:0016747;GO:0019637;GO:0044237;GO:0044238;GO:0044249;GO:0044255;GO:0044424;GO:0044464;GO:…	Cytoplasmic		oxidative_42C;lowpH_42C;25C_42C;oxidative_control;lowpH_control;25C_control;lowpH_agar;25C_agar;lowpH_oxidative;25C_oxidative;25C_lowpH
8.87249	9.98046	-9.70093	-9.98046	-6.65368	-7.08677		+	Cluster 435		21	65.7	26.566	0	227.1	11658000000	477	10.403	0.00105263	AFT93359.1	succinate dehydrogenase iron-sulfur subunit [Francisella tularensis subsp. holarctica FSC200]	FTS_1740	sdhB		Energy production and conversion	C	COG0479	FrdB	Succinate dehydrogenase/fumarate reductase, Fe-S protein subunit	Biosynthesis of antibiotics;Biosynthesis of secondary metabolites;Butanoate metabolism;Carbon metabolism;Citrate cycle (TCA cycle);Metabolic pathways;Microbial metabolism in diverse environments;Oxidative phosphorylation	sdhB, succinate dehydrogenase / fumarate reductase, iron-sulfur subunit [EC:1.3.5.1 1.3.5.4]	K00240	succinate dehydrogenase	GO:0000104;GO:0003674;GO:0003824;GO:0005488;GO:0005575;GO:0005622;GO:0005623;GO:0005886;GO:0006091;GO:0006099;GO:0008150;GO:0008152;GO:0009055;GO:0009060;GO:0009987;GO:0015980;GO:0016020;GO:0016491;GO:0016627;GO:0032991;GO:0043234;GO:0044237;GO:0044238;GO:0044424;GO:0044425;GO:0044459;GO:0044464;GO:0044710;GO:0045273;GO:0045274;GO:0045281;GO:0045282;GO:0045333;GO:0051536;GO:0051537;GO:0051538;GO:…	CytoplasmicMembrane		control_42C;agar_42C;oxidative_42C;25C_42C;lowpH_42C;25C_control;lowpH_control;25C_agar;lowpH_agar;25C_oxidative;lowpH_oxidative;lowpH_25C
10.0379	6.97578	-7.28522	-8.47991	-6.54883	-10.0379		+	Cluster 435		16	63.9	27.863	0	78.379	859160000	74	9.49517	0	AFT92501.1	WbtJ protein [Francisella tularensis subsp. holarctica FSC200]	FTS_0601	wbtJ		Translation, ribosomal structure and biogenesis	J							Formyl transferase		Cytoplasmic		oxidative_42C;control_42C;lowpH_42C;25C_42C;lowpH_agar;25C_agar;25C_oxidative;25C_control
9.45511	6.92226	-9.45511	-8.41558	-8.11788	-8.57756		+	Cluster 435		42	81.8	57.402	0	323.31	15548000000	768	9.57517	0	AFT93305.1	chaperonin GroEL [Francisella tularensis subsp. holarctica FSC200]	FTS_1670	groEL		Posttranslational modification, protein turnover, chaperones	O	COG0459	GroEL	Chaperonin GroEL (HSP60 family)	RNA degradation	groEL, chaperonin GroEL	K04077	Prevents misfolding and promotes the refolding and proper assembly of unfolded polypeptides generated under stress conditions (By similarity)	GO:0000003;GO:0000166;GO:0001666;GO:0001882;GO:0001883;GO:0003674;GO:0003824;GO:0005488;GO:0005515;GO:0005524;GO:0005575;GO:0005618;GO:0005622;GO:0005623;GO:0005737;GO:0005829;GO:0005886;GO:0006139;GO:0006152;GO:0006163;GO:0006195;GO:0006200;GO:0006457;GO:0006725;GO:0006753;GO:0006793;GO:0006796;GO:0006807;GO:0006950;GO:0008150;GO:0008152;GO:0009056;GO:0009116;GO:0009117;GO:0009119;GO:0009123;GO:…	Cytoplasmic		lowpH_agar;oxidative_agar;control_agar;25C_agar;oxidative_42C;control_42C;25C_42C;control_lowpH;25C_lowpH;control_oxidative;25C_oxidative
10.0885	11.0689	-11.0689	-8.90173	-7.8244	-9.68026		+	Cluster 435		25	80.2	43.39	0	323.31	10417000000	556	11.0798	0	AFT93339.1	elongation factor Tu [Francisella tularensis subsp. holarctica FSC200]	FTS_1709	tufA		Translation, ribosomal structure and biogenesis	J	COG0050	TufB	Translation elongation factor EF-Tu, a GTPase		tuf, elongation factor Tu	K02358	This protein promotes the GTP-dependent binding of aminoacyl-tRNA to the A-site of ribosomes during protein biosynthesis (By similarity)	GO:0001666;GO:0003674;GO:0003676;GO:0003723;GO:0003746;GO:0005488;GO:0005575;GO:0005618;GO:0005622;GO:0005623;GO:0005737;GO:0005829;GO:0005886;GO:0006412;GO:0006414;GO:0006950;GO:0008135;GO:0008150;GO:0008152;GO:0009058;GO:0009059;GO:0009628;GO:0009987;GO:0010035;GO:0010038;GO:0010039;GO:0010467;GO:0016020;GO:0019538;GO:0030312;GO:0034645;GO:0036293;GO:0040007;GO:0042221;GO:0043170;GO:0044237;GO:…	Cytoplasmic		control_lowpH;25C_lowpH;oxidative_lowpH;agar_lowpH;25C_42C;oxidative_42C;agar_42C;agar_control;agar_25C;agar_oxidative
8.30168	6.66397	-8.30168	-6.3242	-7.58281	-7.17794		+	Cluster 435		7	72.6	10.272	0	88.264	615470000	62	8.57191	0	AFT93306.1	co-chaperonin GroES [Francisella tularensis subsp. holarctica FSC200]	FTS_1671	groES		Posttranslational modification, protein turnover, chaperones	O	COG0234	GroES	Co-chaperonin GroES (HSP10)		groES, chaperonin GroES	K04078	Binds to Cpn60 in the presence of Mg-ATP and suppresses the ATPase activity of the latter (By similarity)	GO:0000003;GO:0003674;GO:0005488;GO:0005515;GO:0005575;GO:0005576;GO:0005618;GO:0005622;GO:0005623;GO:0005737;GO:0005829;GO:0005886;GO:0006355;GO:0006457;GO:0006461;GO:0006950;GO:0008150;GO:0008152;GO:0009266;GO:0009408;GO:0009628;GO:0009636;GO:0009889;GO:0009987;GO:0010468;GO:0010556;GO:0016020;GO:0016032;GO:0016043;GO:0019058;GO:0019067;GO:0019068;GO:0019219;GO:0019222;GO:0019538;GO:0022607;GO:…	Cytoplasmic		42C_control;oxidative_control;25C_control;agar_control;42C_lowpH;oxidative_lowpH;25C_lowpH;agar_lowpH;agar_42C;agar_oxidative;agar_25C
7.4778	5.96083	-7.4778	-6.00521	-6.80697	-6.89392		+	Cluster 435		37	61.2	69.181	0	323.31	3617500000	339	7.95572	0	AFT92942.1	molecular chaperone DnaK [Francisella tularensis subsp. holarctica FSC200]	FTS_1167	dnaK		Posttranslational modification, protein turnover, chaperones	O	COG0443	DnaK	Molecular chaperone DnaK (HSP70)	RNA degradation	dnaK, molecular chaperone DnaK	K04043	Acts as a chaperone (By similarity)	GO:0003674;GO:0005488;GO:0005575;GO:0005622;GO:0005623;GO:0005737;GO:0005886;GO:0006457;GO:0006950;GO:0008150;GO:0008152;GO:0008270;GO:0009266;GO:0009408;GO:0009628;GO:0009987;GO:0016020;GO:0019538;GO:0043167;GO:0043169;GO:0043170;GO:0043335;GO:0044237;GO:0044238;GO:0044260;GO:0044267;GO:0044424;GO:0044464;GO:0046872;GO:0046914;GO:0050896;GO:0071704;GO:0071944	Cytoplasmic		agar_lowpH;control_lowpH;oxidative_lowpH;42C_lowpH;control_25C;oxidative_25C;42C_25C;42C_agar
8.895	5.82658	-8.33968	-6.29169	-7.7399	-8.895		+	Cluster 435		24	62.7	32.866	0	145.66	4666900000	298	8.92903	0.0126438	AFT92466.1	signal peptidase I [Francisella tularensis subsp. holarctica FSC200]	FTS_0554	lepB		Intracellular trafficking, secretion, and vesicular transport	U	COG0681	LepB	Signal peptidase I	Protein export;Quorum sensing	lepB, signal peptidase I [EC:3.4.21.89]	K03100	Signal peptidase I	GO:0003674;GO:0003824;GO:0005488;GO:0005575;GO:0005623;GO:0005886;GO:0006508;GO:0006810;GO:0008104;GO:0008150;GO:0008152;GO:0008233;GO:0009306;GO:0009987;GO:0010467;GO:0015031;GO:0015643;GO:0016020;GO:0016021;GO:0016485;GO:0016787;GO:0019538;GO:0031224;GO:0032940;GO:0033036;GO:0043170;GO:0044238;GO:0044425;GO:0044464;GO:0044699;GO:0044763;GO:0044765;GO:0045184;GO:0046903;GO:0051179;GO:0051234;GO:…	CytoplasmicMembrane		oxidative_agar;lowpH_agar;control_agar;42C_agar;oxidative_25C;lowpH_25C;control_25C;42C_25C
7.08385	8.81431	-8.81431	-7.97161	-6.89436	-6.17486		+	Cluster 435		25	51.8	61.669	0	214.03	1608100000	220	8.88408	0.000657534	AFT93455.1	30S ribosomal protein S1 [Francisella tularensis subsp. holarctica FSC200]	FTS_1862	rpsA		Translation, ribosomal structure and biogenesis	J	COG0539	RpsA	Ribosomal protein S1	Ribosome	RP-S1, small subunit ribosomal protein S1	K02945	thus facilitating recognition of the initiation point. It is needed to translate mRNA with a short Shine-Dalgarno (SD) purine-rich sequence (By similarity)	GO:0003674;GO:0003676;GO:0003723;GO:0003729;GO:0003735;GO:0005198;GO:0005488;GO:0005575;GO:0005622;GO:0005623;GO:0005737;GO:0005829;GO:0005840;GO:0006412;GO:0006417;GO:0008150;GO:0008152;GO:0009058;GO:0009059;GO:0009889;GO:0009890;GO:0009892;GO:0009987;GO:0010467;GO:0010468;GO:0010556;GO:0010558;GO:0010605;GO:0010608;GO:0015935;GO:0016020;GO:0017148;GO:0019222;GO:0019538;GO:0022626;GO:0022627;GO:…	Cytoplasmic		lowpH_agar;oxidative_agar;control_agar;42C_agar;oxidative_25C;control_25C;42C_25C
7.48467	7.91421	-7.39379	-7.91421	-6.7844	-6.55653		+	Cluster 435		11	42	41.722	0	45.856	862850000	109	8.79222	0.00278261	AFT92483.1	acetyl-CoA acetyltransferase [Francisella tularensis subsp. holarctica FSC200]	FTS_0582	fadA		Lipid transport and metabolism	I	COG0183	PaaJ	Acetyl-CoA acetyltransferase	alpha-Linolenic acid metabolism;Benzoate degradation;Biosynthesis of antibiotics;Biosynthesis of secondary metabolites;Fatty acid metabolism;Galactose metabolism;Geraniol degradation;Metabolic pathways;Microbial metabolism in diverse environments;Valine, leucine and isoleucine degradation	fadA, acetyl-CoA acyltransferase [EC:2.3.1.16]	K00632	Catalyzes the final step of fatty acid oxidation in which acetyl-CoA is released and the CoA ester of a fatty acid two carbons shorter is formed (By similarity)		Cytoplasmic		lowpH_agar;control_agar;oxidative_agar;42C_agar;42C_25C
7.05542	8.03301	-8.03301	-7.96083	-7.42834	-5.05517		+	Cluster 435		18	44.3	47.072	0	119.57	1704700000	165	8.89566	0.00108333	AFT92960.1	hypothetical protein FTS_1195 [Francisella tularensis subsp. holarctica FSC200]	FTS_1195			Coenzyme transport and metabolism	H							Aminotransferase, class II		Cytoplasmic		25C_agar;oxidative_agar;control_agar;lowpH_agar;42C_agar;42C_25C;42C_oxidative
7.83513	6.15287	-7.4807	-7.83513	-6.06114	-6.62458		+	Cluster 435		26	89.5	39.745	0	323.31	4409200000	397	8.19984	0.00115663	AFT93450.1	cell division protein FtsZ [Francisella tularensis subsp. holarctica FSC200]	FTS_1857	ftsZ		Cell cycle control, cell division, chromosome partitioning	D	COG0206	FtsZ	Cell division GTPase FtsZ		ftsZ, cell division protein FtsZ	K03531	Essential cell division protein that forms a contractile ring structure (Z ring) at the future cell division site. The regulation of the ring assembly controls the timing and the location of cell division. One of the functions of the FtsZ ring is to recruit other cell division proteins to the septum to produce a new cell wall between the dividing cells. Binds GTP and shows GTPase activity (By sim…	GO:0000166;GO:0000287;GO:0000910;GO:0000917;GO:0001882;GO:0001883;GO:0003674;GO:0003824;GO:0003924;GO:0005488;GO:0005525;GO:0005575;GO:0005622;GO:0005623;GO:0005737;GO:0005886;GO:0006139;GO:0006152;GO:0006163;GO:0006184;GO:0006195;GO:0006461;GO:0006725;GO:0006753;GO:0006793;GO:0006796;GO:0006807;GO:0007049;GO:0008150;GO:0008152;GO:0009056;GO:0009116;GO:0009117;GO:0009119;GO:0009141;GO:0009143;GO:…	Cytoplasmic		42C_agar;lowpH_agar;control_agar;oxidative_agar;42C_25C;lowpH_25C;control_25C;oxidative_25C
7.25117	6.97097	-7.25117	-6.34847	-4.31966	-5.83268		+	Cluster 435		12	56.1	30.22	0	146.75	2811000000	188	7.91182	0.00160684	AFT92159.1	universal stress protein [Francisella tularensis subsp. holarctica FSC200]	FTS_0161	uspA		Signal transduction mechanisms	T	COG0589	UspA	Nucleotide-binding universal stress protein, UspA family		uspA, universal stress protein A		Universal stress protein	GO:0005575;GO:0005622;GO:0005623;GO:0005737;GO:0044424;GO:0044464	Cytoplasmic		lowpH_agar;control_agar;oxidative_agar;42C_agar;lowpH_25C;control_25C;oxidative_25C;42C_25C
6.36427	7.01739	-7.01739	-6.63637	-5.77878	-6.09207		+	Cluster 435		4	28.7	10.66	0	19.21	1465900000	73	7.86551	0.00121053	AFT92895.1	acyl carrier protein [Francisella tularensis subsp. holarctica FSC200]	FTS_1109	acpP		Lipid transport and metabolism;Secondary metabolites biosynthesis, transport and catabolism	I;Q	COG0236	AcpP	Acyl carrier protein		acpP, acyl carrier protein	K02078	Carrier of the growing fatty acid chain in fatty acid biosynthesis (By similarity)	GO:0000036;GO:0003674;GO:0005488;GO:0005575;GO:0005622;GO:0005623;GO:0005737;GO:0006082;GO:0006629;GO:0006631;GO:0006633;GO:0008150;GO:0008152;GO:0008610;GO:0009058;GO:0009987;GO:0016053;GO:0019752;GO:0032787;GO:0043436;GO:0044237;GO:0044238;GO:0044249;GO:0044255;GO:0044281;GO:0044283;GO:0044424;GO:0044464;GO:0044620;GO:0044710;GO:0044711;GO:0046394;GO:0048037;GO:0051192;GO:0071704;GO:0072330;GO:…	Cytoplasmic		lowpH_agar;oxidative_agar;control_agar;42C_agar;lowpH_25C;oxidative_25C;control_25C;42C_25C
5.71372	8.60311	-8.60311	-5.65193	-5.6468	-8.16506		+	Cluster 435		7	49.5	11.896	0	50.474	699520000	64	8.5884	0.00116	AFT92222.1	30S ribosomal protein S10 [Francisella tularensis subsp. holarctica FSC200]	FTS_0232	rpsJ		Translation, ribosomal structure and biogenesis	J	COG0051	RpsJ	Ribosomal protein S10	Ribosome	RP-S10, small subunit ribosomal protein S10	K02946	Involved in the binding of tRNA to the ribosomes (By similarity)	GO:0003674;GO:0003735;GO:0005198;GO:0005575;GO:0005618;GO:0005622;GO:0005623;GO:0005737;GO:0005829;GO:0005840;GO:0005886;GO:0006412;GO:0008150;GO:0008152;GO:0009058;GO:0009059;GO:0009987;GO:0010467;GO:0015935;GO:0016020;GO:0019538;GO:0022626;GO:0022627;GO:0030312;GO:0030529;GO:0032991;GO:0034645;GO:0040007;GO:0043170;GO:0043226;GO:0043228;GO:0043229;GO:0043232;GO:0044237;GO:0044238;GO:0044249;GO:…	Cytoplasmic		control_agar;oxidative_agar;42C_agar;lowpH_agar;control_25C;oxidative_25C;42C_25C;lowpH_25C
11.5999	8.86119	-11.5999	-9.72754	-11.1452	-10.7109		+	Cluster 435		11	68.5	16.809	0	153.71	3389100000	131	11.6104	0	AFT92513.1	bacterioferritin [Francisella tularensis subsp. holarctica FSC200]	FTS_0617	bfr		Inorganic ion transport and metabolism	P	COG2193	Bfr	Bacterioferritin (cytochrome b1)	Porphyrin and chlorophyll metabolism	bfr, bacterioferritin [EC:1.16.3.1]	K03594	Bacterioferritin		Cytoplasmic		oxidative_agar;lowpH_agar;control_agar;42C_agar;oxidative_25C;lowpH_25C;control_25C;42C_25C
11.1493	7.41251	-11.0229	-11.1406	-11.1493	-10.2349		+	Cluster 435		24	60.7	37.238	0	207.77	5790900000	386	11.3364	0	AFT92077.1	HlyD family membrane fusion protein [Francisella tularensis subsp. holarctica FSC200]	FTS_0036	emrA2		Defense mechanisms	V							secretion protein HlyD family		CytoplasmicMembrane		oxidative_agar;lowpH_agar;42C_agar;25C_agar;control_agar;control_oxidative;control_lowpH
-4.77573	7.59305	-7.59305	-5.10611	4.96606	-5.09608		+	Cluster 395		12	57.3	17.807	0	87.529	1159500000	98	7.00151	0.00378142	AFT92220.1	30S ribosomal protein S7 [Francisella tularensis subsp. holarctica FSC200]	FTS_0230	rpsG		Translation, ribosomal structure and biogenesis	J	COG0049	RpsG	Ribosomal protein S7	Ribosome	RP-S7, small subunit ribosomal protein S7	K02992	One of the primary rRNA binding proteins, it binds directly to 16S rRNA where it nucleates assembly of the head domain of the 30S subunit. Is located at the subunit interface close to the decoding center, probably blocks exit of the E-site tRNA (By similarity)	GO:0000028;GO:0003674;GO:0003676;GO:0003723;GO:0003729;GO:0003735;GO:0005198;GO:0005488;GO:0005575;GO:0005618;GO:0005622;GO:0005623;GO:0005737;GO:0005829;GO:0005840;GO:0005886;GO:0006412;GO:0006417;GO:0006996;GO:0008150;GO:0008152;GO:0009058;GO:0009059;GO:0009889;GO:0009890;GO:0009892;GO:0009987;GO:0010467;GO:0010468;GO:0010556;GO:0010558;GO:0010605;GO:0010608;GO:0015935;GO:0016020;GO:0016043;GO:…	Cytoplasmic		control_agar;25C_agar;42C_agar;25C_oxidative;42C_oxidative;25C_lowpH;42C_lowpH
-5.01387	6.91841	-6.91841	-6.58097	4.45973	-5.16207		+	Cluster 395		13	60.1	27.191	0	89.723	935360000	109	6.97737	0.009104	AFT92846.1	ABC transporter, ATP-binding protein [Francisella tularensis subsp. holarctica FSC200]	FTS_1039	yhbG		Cell wall/membrane/envelope biogenesis	M	COG1137	LptB	ABC-type lipopolysaccharide export system, ATPase component	ABC transporters	lptB, lipopolysaccharide export system ATP-binding protein [EC:3.6.3.-]	K06861	abc transporter atp-binding protein	GO:0003674;GO:0003824;GO:0005215;GO:0005319;GO:0005575;GO:0005622;GO:0005623;GO:0005737;GO:0005886;GO:0006139;GO:0006152;GO:0006163;GO:0006195;GO:0006200;GO:0006725;GO:0006753;GO:0006793;GO:0006796;GO:0006807;GO:0006810;GO:0006869;GO:0008150;GO:0008152;GO:0009056;GO:0009116;GO:0009117;GO:0009119;GO:0009123;GO:0009125;GO:0009126;GO:0009128;GO:0009141;GO:0009143;GO:0009144;GO:0009146;GO:0009150;GO:…	Cytoplasmic		25C_agar;oxidative_agar;control_agar;lowpH_agar;42C_agar
-4.27093	6.68923	-6.68923	-6.22078	3.75529	-3.63521		+	Cluster 395		13	31.6	51.534	0	58.486	424370000	55	6.5874	0.00867241	AFT92258.1	dihydrolipoamide dehydrogenase [Francisella tularensis subsp. holarctica FSC200]	FTS_0273			Energy production and conversion	C	COG1249	Lpd	Pyruvate/2-oxoglutarate dehydrogenase complex, dihydrolipoamide dehydrogenase (E3) component or related enzyme		DLD, dihydrolipoamide dehydrogenase [EC:1.8.1.4]		mercuric reductase	GO:0005575;GO:0005623;GO:0005886;GO:0016020;GO:0044464;GO:0071944	Cytoplasmic		oxidative_agar;42C_agar;lowpH_agar;25C_agar;control_agar;control_oxidative;control_42C
-4.19519	6.59792	-6.45693	-6.59792	4.14587	-3.95526		+	Cluster 395		43	51	95.947	0	323.31	11216000000	681	6.70857	0.00232836	AFT92594.1	ribonuclease E [Francisella tularensis subsp. holarctica FSC200]	FTS_0717	rne		Translation, ribosomal structure and biogenesis	J	COG1530	CafA	Ribonuclease G or E	RNA degradation	rne, ribonuclease E [EC:3.1.26.12]	K08300	Ribonuclease E	GO:0000966;GO:0000967;GO:0003674;GO:0003824;GO:0004518;GO:0004540;GO:0005575;GO:0005622;GO:0005623;GO:0005737;GO:0006139;GO:0006396;GO:0006401;GO:0006725;GO:0006807;GO:0008150;GO:0008152;GO:0008995;GO:0009056;GO:0009057;GO:0009987;GO:0010467;GO:0016070;GO:0016787;GO:0016788;GO:0019439;GO:0034470;GO:0034471;GO:0034641;GO:0034655;GO:0034660;GO:0043170;GO:0044237;GO:0044238;GO:0044248;GO:0044260;GO:…	Cytoplasmic		lowpH_25C;control_25C
-4.1525	5.96446	-5.53841	-5.96446	3.83552	-3.11462		+	Cluster 395		15	27.1	44.09	0	48.759	1204500000	147	6.01397	0.00322148	AFT93328.1	fatty acid desaturase [Francisella tularensis subsp. holarctica FSC200]	FTS_1697			Lipid transport and metabolism	I	COG1398	OLE1	Fatty-acid desaturase	Biosynthesis of unsaturated fatty acids;Fatty acid metabolism	SCD, stearoyl-CoA desaturase (Delta-9 desaturase) [EC:1.14.19.1]	K00507	fatty acid desaturase		CytoplasmicMembrane
-4.14372	6.87652	-4.88412	-6.87652	4.43804	-4.24461		+	Cluster 395		24	49.2	69.415	0	167.56	1486300000	142	6.35122	0.00117073	AFT92848.1	hypothetical protein FTS_1041 [Francisella tularensis subsp. holarctica FSC200]	FTS_1041			Lipid transport and metabolism	I							alpha beta hydrolase fold-3 domain protein	GO:0003674;GO:0003824;GO:0006629;GO:0008150;GO:0008152;GO:0009056;GO:0016042;GO:0016298;GO:0016787;GO:0016788;GO:0044238;GO:0044710;GO:0071704;GO:1901575	Cytoplasmic		25C_agar;control_agar
-5.20908	7.27818	-4.56757	-7.27818	6.83704	-4.6963		+	Cluster 395		17	55.2	37.16	0	278.09	2073100000	180	7.41826	0	AFT93005.1	glutathione synthetase [Francisella tularensis subsp. holarctica FSC200]	FTS_1256	gshB		Coenzyme transport and metabolism;Translation, ribosomal structure and biogenesis	H;J	COG0189	RimK	Glutathione synthase/RimK-type ligase, ATP-grasp superfamily	Cysteine and methionine metabolism;Glutathione metabolism;Metabolic pathways	gshB, glutathione synthase [EC:6.3.2.3]	K01920	glutathione synthase	GO:0000287;GO:0003674;GO:0003824;GO:0004363;GO:0005488;GO:0005575;GO:0005622;GO:0005623;GO:0005737;GO:0005829;GO:0006082;GO:0006518;GO:0006520;GO:0006575;GO:0006749;GO:0006750;GO:0006790;GO:0006807;GO:0008150;GO:0008152;GO:0008652;GO:0009058;GO:0009987;GO:0016053;GO:0016874;GO:0016879;GO:0016881;GO:0019184;GO:0019752;GO:0034641;GO:0042398;GO:0043043;GO:0043167;GO:0043169;GO:0043436;GO:0043603;GO:…	Cytoplasmic		42C_agar;control_agar;25C_agar
-7.14863	9.90734	-8.66271	-9.90734	-6.53907	-7.01662		+	Cluster 405		25	83.2	30.12	0	323.31	11313000000	462	9.40903	0.00160714	AFT92438.1	septum site-determining protein MinD [Francisella tularensis subsp. holarctica FSC200]	FTS_0520	minD		Cell cycle control, cell division, chromosome partitioning	D	COG2894	MinD	Septum formation inhibitor-activating ATPase MinD		minD, septum site-determining protein MinD	K03609	site-determining protein	GO:0000003;GO:0000166;GO:0000910;GO:0000917;GO:0000918;GO:0001882;GO:0001883;GO:0003674;GO:0003824;GO:0004857;GO:0005488;GO:0005524;GO:0005575;GO:0005623;GO:0005886;GO:0006139;GO:0006152;GO:0006163;GO:0006195;GO:0006200;GO:0006725;GO:0006753;GO:0006793;GO:0006796;GO:0006807;GO:0007049;GO:0008150;GO:0008152;GO:0009056;GO:0009116;GO:0009117;GO:0009119;GO:0009123;GO:0009125;GO:0009126;GO:0009128;GO:…	Cytoplasmic		oxidative_agar;control_agar;25C_agar;42C_agar
-4.65046	6.93588	-6.13779	-6.93588	-4.27319	-3.74503		+	Cluster 405		3	20.9	13.307	0	28.099	272540000	31	6.65468	0.00316981	AFT93323.1	50S ribosomal protein L19 [Francisella tularensis subsp. holarctica FSC200]	FTS_1692	rplS		Translation, ribosomal structure and biogenesis	J	COG0335	RplS	Ribosomal protein L19	Ribosome	RP-L19, large subunit ribosomal protein L19	K02884	This protein is located at the 30S-50S ribosomal subunit interface and may play a role in the structure and function of the aminoacyl-tRNA binding site (By similarity)	GO:0003674;GO:0003735;GO:0005198;GO:0005575;GO:0005623;GO:0005886;GO:0006412;GO:0008150;GO:0008152;GO:0009058;GO:0009059;GO:0009987;GO:0010467;GO:0016020;GO:0019538;GO:0034645;GO:0040007;GO:0043170;GO:0044237;GO:0044238;GO:0044249;GO:0044260;GO:0044267;GO:0044464;GO:0071704;GO:0071944;GO:1901576	Cytoplasmic		oxidative_agar;control_agar;42C_agar;control_25C;42C_25C;42C_lowpH
-3.45048	5.82988	-5.08919	-5.82988	-3.86762	-4.28298		+	Cluster 405		8	53	24.502	0	81.559	423550000	84	5.55963	0.0163826	AFT92999.1	dethiobiotin synthetase [Francisella tularensis subsp. holarctica FSC200]	FTS_1247	bioD		Coenzyme transport and metabolism	H	COG0132	BioD	Dethiobiotin synthetase	Biotin metabolism;Metabolic pathways	bioD, dethiobiotin synthetase [EC:6.3.3.3]	K01935	Catalyzes a mechanistically unusual reaction, the ATP- dependent insertion of CO2 between the N7 and N8 nitrogen atoms of 7,8-diaminopelargonic acid (DAPA) to form an ureido ring (By similarity)	GO:0003674;GO:0003824;GO:0004141;GO:0005575;GO:0005622;GO:0005623;GO:0005737;GO:0006082;GO:0006766;GO:0006767;GO:0006768;GO:0006790;GO:0006807;GO:0008150;GO:0008152;GO:0009058;GO:0009102;GO:0009110;GO:0009987;GO:0016053;GO:0016874;GO:0016879;GO:0016882;GO:0018130;GO:0019752;GO:0032787;GO:0034641;GO:0042364;GO:0043436;GO:0043603;GO:0043604;GO:0044237;GO:0044249;GO:0044271;GO:0044272;GO:0044281;GO:…	Cytoplasmic		oxidative_lowpH;control_lowpH;42C_lowpH;oxidative_agar;control_agar;42C_agar
-4.81092	7.99769	-7.55688	-7.99769	-6.37789	-6.53574		+	Cluster 405		24	62.2	35.436	0	323.31	9294700000	575	7.94733	0.0049505	AFT92276.1	acetyl-CoA carboxylase carboxyltransferase subunit alpha [Francisella tularensis subsp. holarctica FSC200]	FTS_0292	accA		Lipid transport and metabolism	I	COG0825	AccA	Acetyl-CoA carboxylase alpha subunit	Biosynthesis of antibiotics;Biosynthesis of secondary metabolites;Carbon metabolism;Fatty acid metabolism;Galactose metabolism;Metabolic pathways;Microbial metabolism in diverse environments;Propanoate metabolism;Pyruvate metabolism	accA, acetyl-CoA carboxylase carboxyl transferase subunit alpha [EC:6.4.1.2]	K01962	Component of the acetyl coenzyme A carboxylase (ACC) complex. First, biotin carboxylase catalyzes the carboxylation of biotin on its carrier protein (BCCP) and then the CO(2) group is transferred by the carboxyltransferase to acetyl-CoA to form malonyl-CoA (By similarity)	GO:0001676;GO:0003674;GO:0003824;GO:0003989;GO:0005575;GO:0005622;GO:0005623;GO:0005737;GO:0006082;GO:0006629;GO:0006631;GO:0006633;GO:0008150;GO:0008152;GO:0008610;GO:0009058;GO:0009317;GO:0009329;GO:0009987;GO:0016053;GO:0016421;GO:0016874;GO:0016885;GO:0019752;GO:0032787;GO:0032991;GO:0042759;GO:0043234;GO:0043436;GO:0044237;GO:0044238;GO:0044249;GO:0044255;GO:0044281;GO:0044283;GO:0044424;GO:…	Cytoplasmic		oxidative_agar;control_agar;42C_agar;42C_25C
-5.33237	7.5976	-7.0985	-7.5976	-5.41827	-5.56586		+	Cluster 405		23	63	33.386	0	289.71	8975900000	518	7.38271	0.00933884	AFT93024.1	acetyl-CoA carboxylase, carboxytransferase subunit beta [Francisella tularensis subsp. holarctica FSC200]	FTS_1282	accD		Lipid transport and metabolism	I	COG0777	AccD	Acetyl-CoA carboxylase beta subunit	Biosynthesis of antibiotics;Biosynthesis of secondary metabolites;Carbon metabolism;Fatty acid metabolism;Galactose metabolism;Metabolic pathways;Microbial metabolism in diverse environments;Propanoate metabolism;Pyruvate metabolism	accD, acetyl-CoA carboxylase carboxyl transferase subunit beta [EC:6.4.1.2]	K01963	Component of the acetyl coenzyme A carboxylase (ACC) complex. Biotin carboxylase (BC) catalyzes the carboxylation of biotin on its carrier protein (BCCP) and then the CO(2) group is transferred by the transcarboxylase to acetyl-CoA to form malonyl- CoA (By similarity)	GO:0003674;GO:0003824;GO:0003989;GO:0005575;GO:0005622;GO:0005623;GO:0005737;GO:0006082;GO:0006629;GO:0006631;GO:0006633;GO:0008150;GO:0008152;GO:0008610;GO:0009058;GO:0009317;GO:0009987;GO:0016053;GO:0016421;GO:0016874;GO:0016885;GO:0019752;GO:0032787;GO:0032991;GO:0043234;GO:0043436;GO:0044237;GO:0044238;GO:0044249;GO:0044255;GO:0044281;GO:0044283;GO:0044424;GO:0044444;GO:0044464;GO:0044710;GO:…	Cytoplasmic		42C_agar;oxidative_agar;25C_agar;control_agar;control_lowpH
-5.35149	6.46133	-6.46133	4.30145	-4.46132	-6.31599		+	Cluster 163		4	35.5	12.702	0	8.3911	83448000	27	6.73677	0	AFT92314.1	hypothetical protein FTS_0352 [Francisella tularensis subsp. holarctica FSC200]	FTS_0352													Unknown		42C_lowpH;agar_lowpH;control_lowpH;oxidative_lowpH;25C_lowpH;agar_42C;control_42C;oxidative_42C;25C_42C
-5.15492	4.55185	-6.96507	6.96507	-4.9698	-5.48622		+	Cluster 163		23	38.4	65.882	0	160.4	1982600000	163	6.65871	0.0186883	AFT93153.1	cysteine/glutathione ABC transporter membrane/ATP-binding component [Francisella tularensis subsp. holarctica FSC200]	FTS_1463	cydD		Energy production and conversion;Posttranslational modification, protein turnover, chaperones	C;O	COG4988	CydD	ABC-type transport system involved in cytochrome bd biosynthesis, ATPase and permease components	ABC transporters	cydD, ATP-binding cassette, subfamily C, bacterial CydD	K16013	cysteine glutathione ABC transporter membrane ATP-binding	GO:0000101;GO:0003333;GO:0003674;GO:0003824;GO:0005215;GO:0005575;GO:0005623;GO:0005886;GO:0006139;GO:0006152;GO:0006163;GO:0006195;GO:0006200;GO:0006725;GO:0006753;GO:0006793;GO:0006796;GO:0006807;GO:0006810;GO:0006811;GO:0006812;GO:0006820;GO:0006857;GO:0006865;GO:0008150;GO:0008152;GO:0009056;GO:0009116;GO:0009117;GO:0009119;GO:0009123;GO:0009125;GO:0009126;GO:0009128;GO:0009141;GO:0009143;GO:…	CytoplasmicMembrane		agar_lowpH;oxidative_lowpH;42C_lowpH;control_lowpH;25C_lowpH;control_agar;25C_agar
-4.00768	5.38729	-5.38729	3.98153	-2.54481	2.77159		+	Cluster 423		6	51.4	13.054	0	54.465	897380000	74	5.18427	0.004	AFT92813.1	30S ribosomal protein S6 [Francisella tularensis subsp. holarctica FSC200]	FTS_1000	rpsF		Translation, ribosomal structure and biogenesis	J	COG0360	RpsF	Ribosomal protein S6	Ribosome	RP-S6, small subunit ribosomal protein S6	K02990	Binds together with S18 to 16S ribosomal RNA (By similarity)	GO:0003674;GO:0003735;GO:0005198;GO:0005575;GO:0005622;GO:0005623;GO:0005737;GO:0005829;GO:0005840;GO:0006412;GO:0008150;GO:0008152;GO:0009058;GO:0009059;GO:0009987;GO:0010467;GO:0015935;GO:0019538;GO:0022626;GO:0022627;GO:0030529;GO:0032991;GO:0034645;GO:0043170;GO:0043226;GO:0043228;GO:0043229;GO:0043232;GO:0044237;GO:0044238;GO:0044249;GO:0044260;GO:0044267;GO:0044391;GO:0044422;GO:0044424;GO:…	Cytoplasmic		oxidative_lowpH;25C_lowpH;control_lowpH;agar_lowpH;42C_lowpH;42C_oxidative;42C_25C
6.81385	-3.82703	-6.02965	-6.81385	3.68443	-5.32459		+	Cluster -32		94	68.9	127.54	0	323.31	48795000000	2408	6.63602	0.026981	AFT92922.1;AFT92134.1	PdpB protein [Francisella tularensis subsp. holarctica FSC200];PdpB protein [Francisella tularensis subsp. holarctica FSC200]	FTS_1140;FTS_0112	pdpB2;pdpB1												Unknown		42C_lowpH;oxidative_lowpH;25C_lowpH;agar_lowpH
6.67344	4.87297	3.54425	-6.29425	4.02898	-6.67344		+	Cluster -81		28	53.7	72.371	0	192.35	2055100000	247	6.85035	0.00470707	AFT92251.1	heat shock protein 90 [Francisella tularensis subsp. holarctica FSC200]	FTS_0263	htpG		Posttranslational modification, protein turnover, chaperones	O	COG0326	HtpG	Molecular chaperone, HSP90 family		HSP90A, molecular chaperone HtpG	K04079	Molecular chaperone. Has ATPase activity (By similarity)	GO:0000166;GO:0000302;GO:0000303;GO:0001882;GO:0001883;GO:0003674;GO:0003824;GO:0005488;GO:0005515;GO:0005524;GO:0005575;GO:0005576;GO:0005618;GO:0005622;GO:0005623;GO:0005737;GO:0005829;GO:0005886;GO:0006139;GO:0006152;GO:0006163;GO:0006195;GO:0006200;GO:0006457;GO:0006725;GO:0006753;GO:0006793;GO:0006796;GO:0006807;GO:0006950;GO:0006974;GO:0006979;GO:0008150;GO:0008152;GO:0009056;GO:0009116;GO:…	Cytoplasmic		42C_lowpH;control_lowpH;agar_lowpH;oxidative_lowpH;25C_lowpH
-4.38068	3.63387	3.29371	2.17181	-1.98957	4.38068		+	Cluster 404		11	53.3	22.307	0	55.974	2746900000	64	4.23845	0.0405078	AFT92223.1	50S ribosomal protein L3 [Francisella tularensis subsp. holarctica FSC200]	FTS_0233	rplC		Translation, ribosomal structure and biogenesis	J	COG0087	RplC	Ribosomal protein L3	Ribosome	RP-L3, large subunit ribosomal protein L3	K02906	One of the primary rRNA binding proteins, it binds directly near the 3'-end of the 23S rRNA, where it nucleates assembly of the 50S subunit (By similarity)	GO:0003674;GO:0003735;GO:0005198;GO:0005575;GO:0005622;GO:0005623;GO:0005737;GO:0005829;GO:0005886;GO:0006412;GO:0008150;GO:0008152;GO:0009058;GO:0009059;GO:0009893;GO:0009987;GO:0010467;GO:0010468;GO:0010604;GO:0016020;GO:0019219;GO:0019222;GO:0019538;GO:0031323;GO:0031325;GO:0034645;GO:0040007;GO:0043170;GO:0044087;GO:0044237;GO:0044238;GO:0044249;GO:0044260;GO:0044267;GO:0044424;GO:0044444;GO:…	Cytoplasmic		42C_lowpH;agar_lowpH;control_lowpH;oxidative_lowpH;25C_lowpH
-3.42559	3.38819	3.42559	-1.76694	-2.17543	2.38805		+	Cluster 404		4	26.9	27.655	0	10.44	114250000	9	3.89268	0.0191016	AFT93354.1	triosephosphate isomerase [Francisella tularensis subsp. holarctica FSC200]	FTS_1735	tpiA		Carbohydrate transport and metabolism	G	COG0149	TpiA	Triosephosphate isomerase	Biosynthesis of amino acids;Biosynthesis of antibiotics;Biosynthesis of secondary metabolites;Carbon metabolism;Fructose and mannose metabolism;Glycolysis / Gluconeogenesis;Inositol phosphate metabolism;Metabolic pathways;Microbial metabolism in diverse environments	TPI, triosephosphate isomerase (TIM) [EC:5.3.1.1]	K01803	Triose-phosphate isomerase	GO:0003674;GO:0003824;GO:0004807;GO:0005575;GO:0005576;GO:0005622;GO:0005623;GO:0005737;GO:0005829;GO:0005886;GO:0005975;GO:0005996;GO:0006006;GO:0006007;GO:0006091;GO:0006094;GO:0006096;GO:0008150;GO:0008152;GO:0009056;GO:0009058;GO:0009987;GO:0016020;GO:0016051;GO:0016052;GO:0016853;GO:0016860;GO:0016861;GO:0019318;GO:0019319;GO:0019320;GO:0040007;GO:0044237;GO:0044238;GO:0044424;GO:0044444;GO:…	Cytoplasmic		42C_lowpH;agar_lowpH;oxidative_lowpH;control_lowpH;25C_lowpH
-4.74627	4.28369	2.40323	2.76088	2.39182	4.74627		+	Cluster 404		9	39.2	28.276	0	48.42	339030000	63	4.56125	0.00226772	AFT93082.1	3-deoxy-manno-octulosonate cytidylyltransferase [Francisella tularensis subsp. holarctica FSC200]	FTS_1367	kdsB		Cell wall/membrane/envelope biogenesis	M	COG1212	KdsB	CMP-2-keto-3-deoxyoctulosonic acid synthetase	Lipopolysaccharide biosynthesis;Metabolic pathways	kdsB, 3-deoxy-manno-octulosonate cytidylyltransferase (CMP-KDO synthetase) [EC:2.7.7.38]	K00979	Activates KDO (a required 8-carbon sugar) for incorporation into bacterial lipopolysaccharide in Gram-negative bacteria (By similarity)	GO:0000271;GO:0000287;GO:0003674;GO:0003824;GO:0005488;GO:0005575;GO:0005622;GO:0005623;GO:0005737;GO:0005975;GO:0005976;GO:0005996;GO:0006082;GO:0006629;GO:0008150;GO:0008152;GO:0008610;GO:0008653;GO:0008690;GO:0009058;GO:0009059;GO:0009103;GO:0009244;GO:0009311;GO:0009312;GO:0009987;GO:0016051;GO:0016053;GO:0016740;GO:0016772;GO:0016779;GO:0019294;GO:0019752;GO:0033692;GO:0034637;GO:0034645;GO:…	Cytoplasmic		agar_lowpH;42C_lowpH;oxidative_lowpH;25C_lowpH;control_lowpH
0	-1.47097	0	1.3058	0	1.47097		+	Cluster 376		2	17.2	14.403	0	14.192	50619000	14	1.77313	0.0269953	AFT92548.1	hypothetical protein FTS_0664 [Francisella tularensis subsp. holarctica FSC200]	FTS_0664													Cytoplasmic		agar_lowpH;oxidative_lowpH;25C_lowpH;control_lowpH;42C_lowpH;42C_agar
0	0	0	0	0	0		+	Cluster 376		8	23.9	51.588	0	40.713	140440000	35	1.627	0.0363694	AFT92970.1	potassium transporter peripheral membrane component [Francisella tularensis subsp. holarctica FSC200]	FTS_1207	trkA		Inorganic ion transport and metabolism	P	COG0569	TrkA	Trk K+ transport system, NAD-binding component		trkA, trk system potassium uptake protein	K03499	potassium transporter peripheral membrane	GO:0003674;GO:0005215;GO:0005575;GO:0005623;GO:0005886;GO:0006810;GO:0006811;GO:0006812;GO:0006813;GO:0008150;GO:0008324;GO:0009987;GO:0015075;GO:0015077;GO:0015079;GO:0015672;GO:0016020;GO:0022857;GO:0022890;GO:0022891;GO:0022892;GO:0030001;GO:0034220;GO:0044464;GO:0044699;GO:0044763;GO:0044765;GO:0046873;GO:0051179;GO:0051234;GO:0055085;GO:0071804;GO:0071805;GO:0071944	CytoplasmicMembrane		25C_lowpH;42C_lowpH;agar_lowpH;42C_control;agar_control;42C_oxidative;agar_oxidative
-1.76004	1.47316	0	0	0	1.76004		+	Cluster 376		6	48	14.723	0	54.305	307590000	36	1.96827	0.0175956	AFT92655.1	hypothetical protein FTS_0796 [Francisella tularensis subsp. holarctica FSC200]	FTS_0796													Unknown		25C_lowpH;42C_lowpH;42C_control
-2.01558	2.01558	1.736	0	0	1.88686		+	Cluster 376		3	15.7	39.299	0	7.0224	78568000	15	2.33773	0.0177901	AFT92809.1	phosphoserine aminotransferase [Francisella tularensis subsp. holarctica FSC200]	FTS_0993	serC		Coenzyme transport and metabolism;Amino acid transport and metabolism	E;H	COG1932	SerC	Phosphoserine aminotransferase	Biosynthesis of amino acids;Biosynthesis of antibiotics;Carbon metabolism;Glycine, serine and threonine metabolism;Metabolic pathways;Methane metabolism;Microbial metabolism in diverse environments;Vitamin B6 metabolism	serC, phosphoserine aminotransferase [EC:2.6.1.52]	K00831	Catalyzes the reversible conversion of 3- phosphohydroxypyruvate to phosphoserine and of 3-hydroxy-2-oxo-4- phosphonooxybutanoate to phosphohydroxythreonine (By similarity)	GO:0003674;GO:0003824;GO:0004648;GO:0005575;GO:0005622;GO:0005623;GO:0005737;GO:0006082;GO:0006520;GO:0006563;GO:0006564;GO:0006732;GO:0006793;GO:0006796;GO:0006807;GO:0008150;GO:0008152;GO:0008483;GO:0008652;GO:0009058;GO:0009069;GO:0009070;GO:0009108;GO:0009987;GO:0016053;GO:0016740;GO:0016769;GO:0019637;GO:0019752;GO:0042822;GO:0042823;GO:0043436;GO:0044237;GO:0044238;GO:0044249;GO:0044281;GO:…	Cytoplasmic		agar_oxidative;25C_oxidative;42C_oxidative;25C_lowpH;42C_lowpH
-2.56429	2.0453	2.56429	0	1.30268	1.81327		+	Cluster 376		12	57.9	32.786	0	41.673	242530000	40	2.42076	0.0264652	AFT93149.1	ROK family protein [Francisella tularensis subsp. holarctica FSC200]	FTS_1459	cscK		Carbohydrate transport and metabolism	G	COG0524	RbsK	Sugar or nucleoside kinase, ribokinase family	Amino sugar and nucleotide sugar metabolism;Fructose and mannose metabolism;Metabolic pathways;Starch and sucrose metabolism	E2.7.1.4, fructokinase [EC:2.7.1.4]	K00847	(ROK) family		Cytoplasmic		lowpH_oxidative;42C_oxidative;agar_oxidative;25C_oxidative;25C_control
-3.46456	-2.54576	3.46456	-1.58047	2.23785	2.47951		+	Cluster 390		6	26.3	24.895	0	23.146	201480000	36	3.56979	0.0360632	AFT92318.1	hypothetical protein FTS_0362 [Francisella tularensis subsp. holarctica FSC200]	FTS_0362													Unknown		25C_oxidative;25C_control;25C_agar;25C_lowpH
-2.58527	-1.68001	2.58527	0	2.02155	2.10486		+	Cluster 390		3	19.5	28.392	0	5.162	38946000	10	2.95549	0.0106176	AFT92391.1	methionine aminopeptidase [Francisella tularensis subsp. holarctica FSC200]	FTS_0460	map		Translation, ribosomal structure and biogenesis	J	COG0024	Map	Methionine aminopeptidase		map, methionyl aminopeptidase [EC:3.4.11.18]	K01265	Removes the N-terminal methionine from nascent proteins (By similarity)	GO:0000096;GO:0003674;GO:0003824;GO:0004177;GO:0005488;GO:0005506;GO:0005575;GO:0005622;GO:0005623;GO:0005737;GO:0005829;GO:0005886;GO:0006082;GO:0006464;GO:0006520;GO:0006555;GO:0006790;GO:0006807;GO:0008150;GO:0008152;GO:0008198;GO:0008233;GO:0008235;GO:0008237;GO:0008238;GO:0009066;GO:0009987;GO:0010467;GO:0016020;GO:0016151;GO:0016485;GO:0016787;GO:0019538;GO:0019752;GO:0030145;GO:0035551;GO:…	Cytoplasmic		control_42C;25C_42C;control_agar;25C_agar;25C_oxidative;25C_lowpH;25C_control
-4.08224	2.24706	2.03737	-2.33764	2.13398	4.08224		+	Cluster 390		4	8.4	67.617	0	8.782	148310000	11	3.65044	0.012628	AFT92634.1	GTP binding translational elongation factor Tu and G family protein [Francisella tularensis subsp. holarctica FSC200]	FTS_0766	typA		Signal transduction mechanisms	T	COG1217	TypA	Predicted membrane GTPase involved in stress response		typA, GTP-binding protein	K06207	gtp-binding protein typa	GO:0005575;GO:0005618;GO:0005623;GO:0005886;GO:0006412;GO:0006950;GO:0008150;GO:0008152;GO:0009058;GO:0009059;GO:0009266;GO:0009409;GO:0009628;GO:0009987;GO:0010467;GO:0016020;GO:0019538;GO:0030312;GO:0034645;GO:0043170;GO:0044237;GO:0044238;GO:0044249;GO:0044260;GO:0044267;GO:0044464;GO:0050896;GO:0071704;GO:0071944;GO:1901576	CytoplasmicMembrane		25C_lowpH;25C_42C;25C_control;25C_oxidative;25C_agar
5.18771	6.12678	3.19539	-6.12678	5.9046	5.74881		+	Cluster 387		8	37.8	23.003	0	59.643	621510000	92	6.39974	0.018623	AFT92651.1	Type IV pili periplasmic component [Francisella tularensis subsp. holarctica FSC200]	FTS_0791	pilP		Cell motility;Extracellular structures	N;W	COG3168	PilP	Tfp pilus assembly protein PilP		pilP, type IV pilus assembly protein PilP	K02665			Unknown		25C_lowpH;agar_lowpH;oxidative_lowpH;control_lowpH;oxidative_42C;control_42C;oxidative_25C;control_25C
3.57237	3.44532	1.33641	-3.57237	2.70302	0		+	Cluster 387		3	19.6	25.457	0	27.418	234660000	21	3.68242	0.00951145	AFT92086.1	hypothetical protein FTS_0052 [Francisella tularensis subsp. holarctica FSC200]	FTS_0052			Function unknown	S							membrane		CytoplasmicMembrane		agar_lowpH;control_lowpH;agar_42C;control_42C;control_oxidative
2.88663	3.59856	1.93997	-3.59856	3.12661	2.06634		+	Cluster 387		8	41.1	24.466	0	27.708	325090000	71	3.48394	0.00963636	AFT92610.1	ribose-5-phosphate isomerase A [Francisella tularensis subsp. holarctica FSC200]	FTS_0736	rpiA		Carbohydrate transport and metabolism	G	COG0120	RpiA	Ribose 5-phosphate isomerase	Biosynthesis of amino acids;Biosynthesis of antibiotics;Biosynthesis of secondary metabolites;Carbon metabolism;Metabolic pathways;Microbial metabolism in diverse environments;Pentose phosphate pathway	rpiA, ribose 5-phosphate isomerase A [EC:5.3.1.6]	K01807	phosphoriboisomerase A	GO:0003674;GO:0003824;GO:0004751;GO:0005575;GO:0005622;GO:0005623;GO:0005737;GO:0005829;GO:0005975;GO:0005996;GO:0006006;GO:0006007;GO:0006014;GO:0006098;GO:0006139;GO:0006725;GO:0006732;GO:0006733;GO:0006739;GO:0006740;GO:0006753;GO:0006793;GO:0006796;GO:0006807;GO:0008150;GO:0008152;GO:0009056;GO:0009117;GO:0009987;GO:0016052;GO:0016853;GO:0016860;GO:0016861;GO:0019318;GO:0019320;GO:0019321;GO:…	Cytoplasmic		agar_oxidative;agar_42C;agar_lowpH
2.92933	4.52294	2.60705	-4.52294	3.61177	3.10127		+	Cluster 387		14	63.8	25.388	0	112.35	976760000	119	4.19167	0.0171671	AFT92155.1	hypothetical protein FTS_0152 [Francisella tularensis subsp. holarctica FSC200]	FTS_0152			Function unknown	S	COG1392	YkaA	Uncharacterized conserved protein YkaA, distantly related to PhoU, UPF0111/DUF47 family		uncharacterized protein	K07220	Phosphate transport regulator		Cytoplasmic		25C_lowpH;25C_oxidative
3.54337	4.34522	3.13443	-4.34522	3.58169	3.68913		+	Cluster 387		15	32.1	64.067	0	47.762	539310000	55	4.25508	0.0162317	AFT92571.1	long chain fatty acid CoA ligase [Francisella tularensis subsp. holarctica FSC200]	FTS_0691	caiC		Lipid transport and metabolism;Secondary metabolites biosynthesis, transport and catabolism	I;Q	COG0318;COG1022	CaiC;FAA1	Acyl-CoA synthetase (AMP-forming)/AMP-acid ligase II, Long-chain acyl-CoA synthetase (AMP-forming)	Fatty acid metabolism;Galactose metabolism;Metabolic pathways;Quorum sensing	ACSL, long-chain acyl-CoA synthetase [EC:6.2.1.3]	K01897	Amp-dependent synthetase and ligase	GO:0000166;GO:0001676;GO:0001882;GO:0001883;GO:0003674;GO:0003824;GO:0004467;GO:0005488;GO:0005504;GO:0005524;GO:0005575;GO:0005622;GO:0005623;GO:0005737;GO:0005829;GO:0005886;GO:0006082;GO:0006629;GO:0006631;GO:0006635;GO:0006637;GO:0006644;GO:0006732;GO:0006793;GO:0006796;GO:0008150;GO:0008152;GO:0008289;GO:0008610;GO:0008654;GO:0009056;GO:0009058;GO:0009062;GO:0009898;GO:0009987;GO:0015645;GO:…	Cytoplasmic		agar_lowpH
2.1568	3.6017	3.04526	-3.93284	3.19744	3.93284		+	Cluster 387		20	77.7	27.775	0	211.17	2947300000	237	3.91841	0.0192021	AFT93117.1	enoyl-ACP reductase I [Francisella tularensis subsp. holarctica FSC200]	FTS_1414	fabl		Lipid transport and metabolism	I	COG0623	FabI	Enoyl-[acyl-carrier-protein] reductase (NADH)	Biosynthesis of antibiotics;Biotin metabolism;Fatty acid metabolism;Galactose metabolism;Metabolic pathways	fabI, enoyl-[acyl-carrier protein] reductase I [EC:1.3.1.9 1.3.1.10]	K00208	Enoyl- acyl-carrier-protein reductase NADH	GO:0003674;GO:0003824;GO:0004312;GO:0004318;GO:0005575;GO:0005623;GO:0005886;GO:0006082;GO:0006461;GO:0006629;GO:0006631;GO:0006633;GO:0006766;GO:0006767;GO:0006768;GO:0006790;GO:0006807;GO:0008150;GO:0008152;GO:0008610;GO:0009058;GO:0009102;GO:0009110;GO:0009987;GO:0016020;GO:0016043;GO:0016053;GO:0016491;GO:0016627;GO:0016628;GO:0016740;GO:0016746;GO:0016747;GO:0018130;GO:0019752;GO:0022607;GO:…	CytoplasmicMembrane		agar_lowpH;25C_lowpH
1.59276	2.21465	4.00716	-4.00716	2.10652	3.19277		+	Cluster 387		11	38	44.212	0	39.133	198970000	20	3.69253	0.00899145	AFT92645.1	aspartate aminotransferase [Francisella tularensis subsp. holarctica FSC200]	FTS_0783	aat		Amino acid transport and metabolism	E	COG0436	AspB	Aspartate/methionine/tyrosine aminotransferase	2-Oxocarboxylic acid metabolism;Alanine, aspartate and glutamate metabolism;Arginine and proline metabolism;Arginine biosynthesis;Biosynthesis of amino acids;Biosynthesis of antibiotics;Biosynthesis of secondary metabolites;Cysteine and methionine metabolism;Metabolic pathways;Phenylalanine metabolism;Phenylalanine, tyrosine and tryptophan biosynthesis	aspB, aspartate aminotransferase [EC:2.6.1.1]	K00812	Aminotransferase	GO:0003674;GO:0003824;GO:0004069;GO:0005575;GO:0005622;GO:0005623;GO:0005737;GO:0006082;GO:0006520;GO:0006531;GO:0006532;GO:0006533;GO:0006807;GO:0008150;GO:0008152;GO:0008483;GO:0008652;GO:0009056;GO:0009058;GO:0009063;GO:0009066;GO:0009067;GO:0009068;GO:0009987;GO:0016053;GO:0016054;GO:0016740;GO:0016769;GO:0019752;GO:0043436;GO:0043648;GO:0043649;GO:0043650;GO:0044237;GO:0044238;GO:0044248;GO:…	Cytoplasmic		25C_lowpH;agar_lowpH;25C_oxidative;agar_oxidative
4.09931	2.0191	3.65245	-4.09931	-2.44542	-3.48033		+	Cluster 389		11	32.7	41.674	0	52.336	516880000	75	4.55339	0.00925	AFT92054.1	DNA polymerase III, beta subunit [Francisella tularensis subsp. holarctica FSC200]	FTS_0001	dnaN		Replication, recombination and repair	L	COG0592	DnaN	DNA polymerase III sliding clamp (beta) subunit, PCNA homolog	DNA replication;Homologous recombination;Metabolic pathways;Mismatch repair;Purine metabolism;Pyrimidine metabolism	DPO3B, DNA polymerase III subunit beta [EC:2.7.7.7]	K02338	DNA polymerase III is a complex, multichain enzyme responsible for most of the replicative synthesis in bacteria. This DNA polymerase also exhibits 3' to 5' exonuclease activity. The beta chain is required for initiation of replication once it is clamped onto DNA, it slides freely (bidirectional and ATP- independent) along duplex DNA (By similarity)	GO:0003674;GO:0003824;GO:0003887;GO:0005575;GO:0005576;GO:0005618;GO:0005622;GO:0005623;GO:0005737;GO:0005829;GO:0006139;GO:0006259;GO:0006260;GO:0006261;GO:0006271;GO:0006725;GO:0006807;GO:0006950;GO:0006974;GO:0008150;GO:0008152;GO:0009058;GO:0009059;GO:0009360;GO:0009987;GO:0016740;GO:0016772;GO:0016779;GO:0022616;GO:0030312;GO:0032991;GO:0033554;GO:0034061;GO:0034641;GO:0034645;GO:0042575;GO:…	Cytoplasmic		agar_lowpH;25C_lowpH;agar_control;25C_control;agar_oxidative;25C_oxidative;agar_42C;25C_42C
0	1.56466	2.98797	-2.98797	0	-1.45001		+	Cluster 389		7	47.1	25.988	0	31.423	240260000	40	2.56511	0.0442291	AFT92616.1	short-chain dehydrogenase [Francisella tularensis subsp. holarctica FSC200]	FTS_0743			Function unknown	S							Dehydrogenase	GO:0003674;GO:0003824;GO:0008150;GO:0008152;GO:0016491;GO:0044710;GO:0055114	Cytoplasmic		agar_lowpH;25C_lowpH;agar_42C;25C_42C;agar_control;25C_control
1.44853	2.26275	2.2797	-1.51876	-2.2797	0		+	Cluster 389		10	31.7	45.282	0	32.304	472090000	55	2.68349	0.0289324	AFT92584.1	serine hydroxymethyltransferase [Francisella tularensis subsp. holarctica FSC200]	FTS_0704	glyA		Amino acid transport and metabolism	E	COG0112	GlyA	Glycine/serine hydroxymethyltransferase	Biosynthesis of amino acids;Biosynthesis of antibiotics;Biosynthesis of secondary metabolites;Carbon metabolism;Cyanoamino acid metabolism;Glycine, serine and threonine metabolism;Glyoxylate and dicarboxylate metabolism;Metabolic pathways;Methane metabolism;Microbial metabolism in diverse environments;One carbon pool by folate	glyA, glycine hydroxymethyltransferase [EC:2.1.2.1]	K00600	Catalyzes the reversible interconversion of serine and glycine with tetrahydrofolate (THF) serving as the one-carbon carrier. This reaction serves as the major source of one-carbon groups required for the biosynthesis of purines, thymidylate, methionine, and other important biomolecules. Also exhibits THF- independent aldolase activity toward beta-hydroxyamino acids, producing glycine and aldehyd…	GO:0003674;GO:0003824;GO:0004372;GO:0005488;GO:0005575;GO:0005618;GO:0005622;GO:0005623;GO:0005737;GO:0005829;GO:0005886;GO:0006082;GO:0006520;GO:0006544;GO:0006545;GO:0006546;GO:0006563;GO:0006565;GO:0006730;GO:0006807;GO:0006950;GO:0006952;GO:0008150;GO:0008152;GO:0008270;GO:0008652;GO:0009056;GO:0009058;GO:0009063;GO:0009069;GO:0009070;GO:0009071;GO:0009607;GO:0009987;GO:0016020;GO:0016053;GO:…	Cytoplasmic		25C_42C;25C_lowpH;25C_oxidative;25C_control
-2.27146	3.1888	0	-1.61778	-3.1888	-3.07946		+	Cluster 396		7	20.1	38.015	0	19.914	123940000	18	3.248	0.019288	AFT92873.1	transaldolase B [Francisella tularensis subsp. holarctica FSC200]	FTS_1078	talA		Carbohydrate transport and metabolism	G	COG0176	TalA	Transaldolase	Biosynthesis of amino acids;Biosynthesis of antibiotics;Biosynthesis of secondary metabolites;Carbon metabolism;Metabolic pathways;Microbial metabolism in diverse environments;Pentose phosphate pathway	E2.2.1.2, transaldolase [EC:2.2.1.2]	K00616	Transaldolase is important for the balance of metabolites in the pentose-phosphate pathway (By similarity)	GO:0003674;GO:0003824;GO:0004801;GO:0005575;GO:0005622;GO:0005623;GO:0005737;GO:0005829;GO:0005975;GO:0005996;GO:0006006;GO:0006007;GO:0006098;GO:0006139;GO:0006725;GO:0006732;GO:0006733;GO:0006739;GO:0006740;GO:0006753;GO:0006793;GO:0006796;GO:0006807;GO:0008150;GO:0008152;GO:0009056;GO:0009117;GO:0009987;GO:0016020;GO:0016052;GO:0016740;GO:0016744;GO:0019318;GO:0019320;GO:0019362;GO:0019637;GO:…	Cytoplasmic		agar_42C;oxidative_42C;25C_42C;control_42C
-4.34559	4.4834	-4.4834	-3.7553	-3.9575	-2.05232		+	Cluster 396		9	44.2	18.15	0	16.718	330010000	42	4.70222	0.0166971	AFT92455.1	(3R)-hydroxymyristoyl-ACP dehydratase [Francisella tularensis subsp. holarctica FSC200]	FTS_0540	fabZ		Lipid transport and metabolism	I	COG0764	FabA	3-hydroxymyristoyl/3-hydroxydecanoyl-(acyl carrier protein) dehydratase	Biotin metabolism;Fatty acid metabolism;Galactose metabolism;Metabolic pathways	fabZ, 3-hydroxyacyl-[acyl-carrier-protein] dehydratase [EC:4.2.1.59]	K02372	Involved in unsaturated fatty acids biosynthesis. Catalyzes the dehydration of short chain beta-hydroxyacyl-ACPs and long chain saturated and unsaturated beta-hydroxyacyl-ACPs (By similarity)	GO:0003674;GO:0003824;GO:0005575;GO:0005622;GO:0005623;GO:0005737;GO:0006082;GO:0006629;GO:0006631;GO:0006633;GO:0008150;GO:0008152;GO:0008610;GO:0008693;GO:0009058;GO:0009987;GO:0016053;GO:0016829;GO:0016835;GO:0016836;GO:0019171;GO:0019752;GO:0032787;GO:0043436;GO:0044237;GO:0044238;GO:0044249;GO:0044255;GO:0044281;GO:0044283;GO:0044424;GO:0044464;GO:0044710;GO:0044711;GO:0046394;GO:0071704;GO:…	Cytoplasmic		control_42C;oxidative_42C;agar_42C;25C_42C
-2.08486	4.11242	-3.55342	-4.11242	-2.60902	-3.19538		+	Cluster 396		5	29.9	25.151	0	22.835	203180000	40	3.96123	0.0190818	AFT92745.1	glutaredoxin 2 [Francisella tularensis subsp. holarctica FSC200]	FTS_0907	grxB		Posttranslational modification, protein turnover, chaperones	O	COG2999	GrxB	Glutaredoxin 2		grxB, glutaredoxin 2	K03675	glutaredoxin 2	GO:0003674;GO:0003824;GO:0005575;GO:0005622;GO:0005623;GO:0005737;GO:0005829;GO:0008150;GO:0008152;GO:0015036;GO:0015037;GO:0015038;GO:0016491;GO:0016667;GO:0044424;GO:0044444;GO:0044464;GO:0044710;GO:0055114	Cytoplasmic		lowpH_42C;oxidative_42C;control_42C;agar_42C;25C_42C
1.72432	0	-2.78871	-2.85948	-2.11782	2.85948		+	Cluster 382		6	19.3	47.128	0	17.891	70499000	28	3.2589	0.0163505	AFT92508.1	transcription termination factor Rho [Francisella tularensis subsp. holarctica FSC200]	FTS_0609	rho		Transcription	K	COG1158	Rho	Transcription termination factor Rho	RNA degradation	rho, transcription termination factor Rho	K03628	Facilitates transcription termination by a mechanism that involves Rho binding to the nascent RNA, activation of Rho's RNA-dependent ATPase activity, and release of the mRNA from the DNA template (By similarity)	GO:0003674;GO:0003676;GO:0003723;GO:0005488;GO:0005575;GO:0005618;GO:0005623;GO:0005886;GO:0006139;GO:0006351;GO:0006353;GO:0006360;GO:0006363;GO:0006461;GO:0006725;GO:0006807;GO:0008150;GO:0008152;GO:0009058;GO:0009059;GO:0009987;GO:0010467;GO:0016020;GO:0016043;GO:0016070;GO:0018130;GO:0019438;GO:0022607;GO:0030312;GO:0032774;GO:0034641;GO:0034645;GO:0034654;GO:0040007;GO:0043170;GO:0043933;GO:…	CytoplasmicMembrane		control_42C;agar_42C;oxidative_42C;25C_42C;agar_lowpH;oxidative_lowpH;25C_lowpH
2.39917	0	-2.27966	-1.78197	-2.39917	0		+	Cluster 382		24	35.5	86.222	0	74.938	266570000	64	2.61637	0.00941176	AFT92727.1	DNA-binding, ATP-dependent protease La [Francisella tularensis subsp. holarctica FSC200]	FTS_0885	lon		Posttranslational modification, protein turnover, chaperones	O	COG0466	Lon	ATP-dependent Lon protease, bacterial type		lon, ATP-dependent Lon protease [EC:3.4.21.53]	K01338	ATP-dependent serine protease that mediates the selective degradation of mutant and abnormal proteins as well as certain short-lived regulatory proteins. Required for cellular homeostasis and for survival from DNA damage and developmental changes induced by stress. Degrades polypeptides processively to yield small peptide fragments that are 5 to 10 amino acids long. Binds to DNA in a double-stran…	GO:0000166;GO:0001882;GO:0001883;GO:0003674;GO:0003676;GO:0003677;GO:0003824;GO:0004175;GO:0004176;GO:0004252;GO:0005488;GO:0005524;GO:0005575;GO:0005622;GO:0005623;GO:0005737;GO:0006139;GO:0006152;GO:0006163;GO:0006195;GO:0006200;GO:0006508;GO:0006515;GO:0006725;GO:0006753;GO:0006793;GO:0006796;GO:0006807;GO:0006950;GO:0008150;GO:0008152;GO:0008233;GO:0008236;GO:0009056;GO:0009057;GO:0009116;GO:…	Cytoplasmic		agar_42C;control_42C;oxidative_42C;25C_42C;control_lowpH;oxidative_lowpH;25C_lowpH
0	2.71595	0	-2.71595	-2.39558	0		+	Cluster 382		7	39.8	27.458	0	20.044	102190000	25	2.63917	0.0463617	AFT92967.1	sufS activator complex, sufC subunit [Francisella tularensis subsp. holarctica FSC200]	FTS_1204	sufC		Posttranslational modification, protein turnover, chaperones	O	COG0396	SufC	Fe-S cluster assembly ATPase SufC		sufC, Fe-S cluster assembly ATP-binding protein	K09013	FeS assembly ATPase SufC	GO:0005575;GO:0005622;GO:0005623;GO:0005737;GO:0005886;GO:0008150;GO:0008152;GO:0009058;GO:0016020;GO:0016043;GO:0016226;GO:0022607;GO:0031163;GO:0040007;GO:0044085;GO:0044424;GO:0044464;GO:0071840;GO:0071944	Cytoplasmic		agar_42C;oxidative_42C;25C_42C;agar_lowpH;oxidative_lowpH;25C_lowpH
2.16868	0	0	-2.16868	0	0		+	Cluster 382		7	18.1	48.246	0	12.26	248890000	35	1.83584	0.0213568	AFT92991.1	6-hydroxymethyl-7,8-dihydropterin pyrophosphokinase/dihydropteroate synthase [Francisella tularensis subsp. holarctica FSC200]	FTS_1237	folK		Coenzyme transport and metabolism	H	COG0801;COG0294	FolK;FolP	7,8-dihydro-6-hydroxymethylpterin-pyrophosphokinase, Dihydropteroate synthase	Folate biosynthesis;Metabolic pathways	folKP, 2-amino-4-hydroxy-6-hydroxymethyldihydropteridine diphosphokinase / dihydropteroate synthase [EC:2.7.6.3 2.5.1.15]	K13941	dihydropteroate synthase	GO:0003674;GO:0003824;GO:0004156;GO:0005575;GO:0005622;GO:0005623;GO:0005737;GO:0006082;GO:0006520;GO:0006575;GO:0006725;GO:0006732;GO:0006760;GO:0006766;GO:0006767;GO:0006807;GO:0008150;GO:0008152;GO:0008652;GO:0009058;GO:0009108;GO:0009110;GO:0009396;GO:0009987;GO:0016053;GO:0016740;GO:0016765;GO:0018130;GO:0019438;GO:0019752;GO:0034641;GO:0042221;GO:0042364;GO:0042398;GO:0042493;GO:0042558;GO:…	Cytoplasmic		oxidative_lowpH;25C_lowpH;control_lowpH;agar_lowpH
1.40327	1.44056	0	-1.44056	0	0		+	Cluster 382		4	53	7.8011	0	19.551	297460000	33	1.86169	0.026159	AFT92231.1	50S ribosomal protein L29 [Francisella tularensis subsp. holarctica FSC200]	FTS_0241	rpmC		Translation, ribosomal structure and biogenesis	J	COG0255	RpmC	Ribosomal protein L29	Ribosome	RP-L29, large subunit ribosomal protein L29	K02904	50s ribosomal protein l29		Cytoplasmic		agar_lowpH;control_lowpH;25C_lowpH;oxidative_lowpH
2.12601	2.04075	0	-2.12601	-1.56569	0		+	Cluster 382		14	39.6	67.344	0	29.635	244080000	58	2.54758	0.0467532	AFT92372.1	malate dehydrogenase [Francisella tularensis subsp. holarctica FSC200]	FTS_0428	maeA		Energy production and conversion	C	COG0281	SfcA	Malic enzyme	Carbon metabolism;Pyruvate metabolism;Two-component system	ME2, malate dehydrogenase (oxaloacetate-decarboxylating) [EC:1.1.1.38]	K00027	NAD-dependent malic enzyme	GO:0005575;GO:0005622;GO:0005623;GO:0005737;GO:0005829;GO:0044424;GO:0044444;GO:0044464	Cytoplasmic		oxidative_lowpH;agar_lowpH;control_lowpH;25C_lowpH;agar_42C;control_42C;25C_42C
2.65996	2.78953	-2.0179	-2.78953	-2.45542	-2.60759		+	Cluster 382		7	45.3	21.657	0	32.042	306330000	41	3.7645	0.0124306	AFT92807.1	short chain dehydrogenase [Francisella tularensis subsp. holarctica FSC200]	FTS_0991			Lipid transport and metabolism;Secondary metabolites biosynthesis, transport and catabolism	I;Q							Short chain dehydrogenase		Cytoplasmic		agar_42C;oxidative_42C;25C_42C
2.62194	2.64167	-2.43678	-2.64167	0	-2.2654		+	Cluster 382		8	27.9	38.833	0	22.458	165350000	37	3.5958	0.0191147	AFT92059.1	recombinase A [Francisella tularensis subsp. holarctica FSC200]	FTS_0011	recA		Replication, recombination and repair	L	COG0468	RecA	RecA/RadA recombinase	Homologous recombination	recA, recombination protein RecA	K03553	Can catalyze the hydrolysis of ATP in the presence of single-stranded DNA, the ATP-dependent uptake of single-stranded DNA by duplex DNA, and the ATP-dependent hybridization of homologous single-stranded DNAs. It interacts with LexA causing its activation and leading to its autocatalytic cleavage (By similarity)	GO:0003674;GO:0003676;GO:0003677;GO:0003697;GO:0005488;GO:0005575;GO:0005622;GO:0005623;GO:0005737;GO:0006139;GO:0006259;GO:0006281;GO:0006310;GO:0006725;GO:0006807;GO:0006928;GO:0006950;GO:0006974;GO:0007154;GO:0008150;GO:0008152;GO:0009432;GO:0009605;GO:0009987;GO:0009991;GO:0031668;GO:0033554;GO:0034641;GO:0040011;GO:0043170;GO:0043566;GO:0044237;GO:0044238;GO:0044260;GO:0044424;GO:0044464;GO:…	Cytoplasmic		oxidative_42C;25C_42C;agar_42C;25C_lowpH;agar_lowpH
0	3.0735	-3.0735	-1.87316	-1.86698	-1.71313		+	Cluster 382		12	31	52.781	0	41.006	163160000	36	2.7518	0.0350385	AFT92408.1	glycine dehydrogenase subunit 2 [Francisella tularensis subsp. holarctica FSC200]	FTS_0482	gcvP2		Amino acid transport and metabolism	E	COG1003	GcvP2	Glycine cleavage system protein P (pyridoxal-binding), C-terminal domain	Biosynthesis of antibiotics;Biosynthesis of secondary metabolites;Carbon metabolism;Glycine, serine and threonine metabolism;Glyoxylate and dicarboxylate metabolism;Metabolic pathways	gcvPB, glycine dehydrogenase subunit 2 [EC:1.4.4.2]	K00283	The glycine cleavage system catalyzes the degradation of glycine. The P protein binds the alpha-amino group of glycine through its pyridoxal phosphate cofactor	GO:0003674;GO:0003824;GO:0004375;GO:0005575;GO:0005622;GO:0005623;GO:0005737;GO:0005829;GO:0008150;GO:0008152;GO:0016491;GO:0016638;GO:0016642;GO:0044424;GO:0044444;GO:0044464;GO:0044710;GO:0055114	Cytoplasmic		25C_42C;oxidative_42C;oxidative_lowpH
1.34566	3.04103	-3.18906	0	1.73512	3.18906		+	Cluster 378		18	38.8	56.798	0	174.38	1970700000	195	3.16783	0.0125398	AFT92288.1	dihydrolipoamide acetyltransferase [Francisella tularensis subsp. holarctica FSC200]	FTS_0310	aceF		Energy production and conversion	C	COG0508	AceF	Pyruvate/2-oxoglutarate dehydrogenase complex, dihydrolipoamide acyltransferase (E2) component	Biosynthesis of antibiotics;Biosynthesis of secondary metabolites;Carbon metabolism;Citrate cycle (TCA cycle);Glycolysis / Gluconeogenesis;Metabolic pathways;Microbial metabolism in diverse environments;Pyruvate metabolism	DLAT, pyruvate dehydrogenase E2 component (dihydrolipoamide acetyltransferase) [EC:2.3.1.12]	K00627	Dihydrolipoamide acetyltransferase	GO:0003674;GO:0003824;GO:0004742;GO:0005488;GO:0005504;GO:0005575;GO:0005622;GO:0005623;GO:0005737;GO:0005829;GO:0006082;GO:0006084;GO:0006085;GO:0006086;GO:0006090;GO:0006637;GO:0006732;GO:0006793;GO:0008150;GO:0008152;GO:0008289;GO:0009058;GO:0009108;GO:0009987;GO:0016407;GO:0016417;GO:0016418;GO:0016740;GO:0016746;GO:0016747;GO:0019752;GO:0030523;GO:0031405;GO:0031406;GO:0032787;GO:0032991;GO:…	Cytoplasmic		oxidative_agar;25C_agar;oxidative_lowpH;25C_lowpH;25C_42C
3.02438	3.23693	-3.23693	0	2.13023	2.07108		+	Cluster 378		8	39.8	25.726	0	32.354	375090000	80	3.20352	0.0362511	AFT92403.1	ABC transporter, ATPase component [Francisella tularensis subsp. holarctica FSC200]	FTS_0477	lolD		Cell wall/membrane/envelope biogenesis	M	COG1136	LolD	ABC-type lipoprotein export system, ATPase component	ABC transporters	lolD, lipoprotein-releasing system ATP-binding protein [EC:3.6.3.-]	K09810	Part of the ABC transporter complex LolCDE involved in the translocation of mature outer membrane-directed lipoproteins, from the inner membrane to the periplasmic chaperone, LolA. Responsible for the formation of the LolA-lipoprotein complex in an ATP-dependent manner (By similarity)	GO:0003674;GO:0003824;GO:0005215;GO:0005575;GO:0005623;GO:0005886;GO:0006139;GO:0006152;GO:0006163;GO:0006195;GO:0006200;GO:0006725;GO:0006753;GO:0006793;GO:0006796;GO:0006807;GO:0006810;GO:0008104;GO:0008150;GO:0008152;GO:0008565;GO:0009056;GO:0009116;GO:0009117;GO:0009119;GO:0009123;GO:0009125;GO:0009126;GO:0009128;GO:0009141;GO:0009143;GO:0009144;GO:0009146;GO:0009150;GO:0009154;GO:0009158;GO:…	CytoplasmicMembrane		lowpH_control;agar_control;agar_42C
2.62153	3.42988	-3.42988	1.32153	1.88738	2.61326		+	Cluster 378		17	61.1	35.541	0	81.357	1080900000	142	3.23086	0.00576077	AFT93203.1	LysR family transcriptional regulator [Francisella tularensis subsp. holarctica FSC200]	FTS_1529											transcriptional regulator	GO:0001071;GO:0003674;GO:0003700;GO:0006355;GO:0008150;GO:0009889;GO:0010468;GO:0010556;GO:0019219;GO:0019222;GO:0031323;GO:0031326;GO:0050789;GO:0050794;GO:0051171;GO:0051252;GO:0060255;GO:0065007;GO:0080090;GO:2000112;GO:2001141	Cytoplasmic		agar_42C;25C_42C;agar_control;25C_control
1.83	3.09557	-3.09557	-2.82393	2.5314	1.57533		+	Cluster 378		10	35.9	41.004	0	74.371	1003600000	139	3.58913	0.0443956	AFT92315.1	heat shock protein HtpX [Francisella tularensis subsp. holarctica FSC200]	FTS_0354	htpX		Posttranslational modification, protein turnover, chaperones	O	COG0501	HtpX	Zn-dependent protease with chaperone function		htpX, heat shock protein HtpX [EC:3.4.24.-]	K03799	Heat shock protein HtpX	GO:0005575;GO:0005623;GO:0005886;GO:0016020;GO:0044464;GO:0071944	CytoplasmicMembrane		oxidative_control;25C_control;agar_control;25C_42C;agar_42C
1.3149	3.37097	-3.37097	-3.17209	2.21244	1.62827		+	Cluster 378		3	30.9	9.5732	0	34.401	436820000	30	3.64422	0.0163032	AFT92929.1	hypothetical protein FTS_1154 [Francisella tularensis subsp. holarctica FSC200]	FTS_1154													CytoplasmicMembrane		agar_42C;lowpH_42C;oxidative_42C;lowpH_control;oxidative_control
1.8295	2.67392	-2.67392	-2.53432	1.99268	0		+	Cluster 378		3	22.7	14.617	0	70.919	589190000	51	3.19741	0.0221654	AFT93402.1	NADH dehydrogenase I, A subunit [Francisella tularensis subsp. holarctica FSC200]	FTS_1787	nuoA		Energy production and conversion	C	COG0838	NuoA	NADH:ubiquinone oxidoreductase subunit 3 (chain A)	Metabolic pathways;Oxidative phosphorylation	nuoA, NADH-quinone oxidoreductase subunit A [EC:1.6.5.3]	K00330	NDH-1 shuttles electrons from NADH, via FMN and iron- sulfur (Fe-S) centers, to quinones in the respiratory chain	GO:0003674;GO:0003824;GO:0003954;GO:0005575;GO:0005623;GO:0005886;GO:0008150;GO:0008152;GO:0016020;GO:0016491;GO:0016651;GO:0016655;GO:0044464;GO:0044710;GO:0050136;GO:0055114;GO:0071944	CytoplasmicMembrane		control_lowpH;oxidative_lowpH;25C_lowpH;25C_42C;25C_agar;25C_control;25C_oxidative
2.50875	2.31812	0	-2.50875	2.00596	2.40887		+	Cluster 378		7	43.7	18.592	0	15.897	154600000	29	2.80666	0.0221247	AFT92277.1	hypothetical protein FTS_0293 [Francisella tularensis subsp. holarctica FSC200]	FTS_0293													Cytoplasmic		oxidative_42C;25C_42C;oxidative_lowpH;25C_lowpH;25C_control;25C_agar
1.45827	2.43066	0	-2.59755	2.59755	1.75191		+	Cluster 378		22	52.1	48.862	0	95.642	1004300000	133	2.60083	0.0163133	AFT92495.1	UDP-glucose/GDP-mannose dehydrogenase [Francisella tularensis subsp. holarctica FSC200]	FTS_0595	wbtE		Cell wall/membrane/envelope biogenesis	M	COG0677	WecC	UDP-N-acetyl-D-mannosaminuronate dehydrogenase	Amino sugar and nucleotide sugar metabolism	wbpO, UDP-N-acetyl-D-galactosamine dehydrogenase [EC:1.1.1.-]	K02474	Dehydrogenase		Cytoplasmic		oxidative_42C;25C_42C;25C_lowpH;25C_agar;25C_control
2.27739	2.47974	-1.70694	-2.47974	1.32619	2.437		+	Cluster 378		16	50.6	34.334	0	34.229	631410000	109	3.08413	0.0466464	AFT92510.1	exopolyphosphatase [Francisella tularensis subsp. holarctica FSC200]	FTS_0611	ppx		Nucleotide transport and metabolism;Signal transduction mechanisms;Inorganic ion transport and metabolism	F;P;T	COG0248	GppA	Exopolyphosphatase/pppGpp-phosphohydrolase	Purine metabolism	ppx-gppA, exopolyphosphatase / guanosine-5'-triphosphate,3'-diphosphate pyrophosphatase [EC:3.6.1.11 3.6.1.40]	K01524	Conversion of pppGpp to ppGpp. Guanosine pentaphosphate (pppGpp) is a cytoplasmic signaling molecule which together with ppGpp controls the stringent response , an adaptive process that allows bacteria to respond to amino acid starvation, resulting in the coordinated regulation of numerous cellular activities (By similarity)	GO:0003674;GO:0003824;GO:0004309;GO:0005575;GO:0005623;GO:0005886;GO:0006082;GO:0006139;GO:0006725;GO:0006793;GO:0006797;GO:0006798;GO:0006807;GO:0006950;GO:0007154;GO:0008150;GO:0008152;GO:0008894;GO:0009056;GO:0009267;GO:0009605;GO:0009987;GO:0009991;GO:0015949;GO:0016020;GO:0016462;GO:0016787;GO:0016817;GO:0016818;GO:0031667;GO:0031668;GO:0031669;GO:0033554;GO:0034641;GO:0042594;GO:0043436;GO:…	Cytoplasmic		oxidative_control;25C_control;oxidative_lowpH;25C_lowpH;25C_42C;25C_agar
1.38806	1.89484	-1.89484	0	1.86281	0		+	Cluster 378		6	33.7	30.049	0	29.328	285360000	29	2.27047	0.0324874	AFT92436.1	ABC transporter ATP-binding protein [Francisella tularensis subsp. holarctica FSC200]	FTS_0518			Cell wall/membrane/envelope biogenesis	M	COG1127	MlaF	ABC-type transporter Mla maintaining outer membrane lipid asymmetry, ATPase component MlaF	ABC transporters	mlaF, phospholipid/cholesterol/gamma-HCH transport system ATP-binding protein	K02065	abc transporter atp-binding protein	GO:0003674;GO:0003824;GO:0005215;GO:0005319;GO:0005548;GO:0005575;GO:0005623;GO:0005886;GO:0006139;GO:0006152;GO:0006163;GO:0006195;GO:0006200;GO:0006725;GO:0006753;GO:0006793;GO:0006796;GO:0006807;GO:0006810;GO:0006811;GO:0006820;GO:0006869;GO:0008150;GO:0008152;GO:0009056;GO:0009116;GO:0009117;GO:0009119;GO:0009123;GO:0009125;GO:0009126;GO:0009128;GO:0009141;GO:0009143;GO:0009144;GO:0009146;GO:…	CytoplasmicMembrane		control_lowpH;oxidative_lowpH;25C_lowpH;oxidative_42C;25C_42C;oxidative_agar;25C_agar;oxidative_control;25C_control
1.78191	1.58293	-1.78191	-1.54895	1.3904	0		+	Cluster 378		2	5.8	48.118	0	7.1765	60533000	15	2.55203	0.0167521	AFT93260.1	major facilitator superfamily sugar transporter [Francisella tularensis subsp. holarctica FSC200]	FTS_1606											Major facilitator superfamily (MFS) transport protein		CytoplasmicMembrane		control_lowpH;25C_lowpH;control_agar;25C_agar;control_oxidative;25C_oxidative;control_42C;25C_42C
0	1.35648	-1.96469	-1.67646	1.96469	0		+	Cluster 378		4	7.5	67.337	0	13.31	134000000	14	2.19299	0.0461834	AFT92146.1	ABC-type anion transport system, duplicated permease component [Francisella tularensis subsp. holarctica FSC200]	FTS_0138			Inorganic ion transport and metabolism	P	COG0600	TauC	ABC-type nitrate/sulfonate/bicarbonate transport system, permease component		ABC.SN.P, NitT/TauT family transport system permease protein	K02050	(ABC) transporter	GO:0005575;GO:0016020	CytoplasmicMembrane		25C_agar;control_agar;25C_lowpH;control_lowpH;25C_42C;control_42C
-1.82866	1.82866	-1.34621	-1.79193	1.37929	0		+	Cluster 378		5	21.2	17.749	0	12.014	334180000	18	2.33502	0.0257918	AFT93338.1	preprotein translocase subunit SecE [Francisella tularensis subsp. holarctica FSC200]	FTS_1707	secE		Intracellular trafficking, secretion, and vesicular transport	U	COG0690	SecE	Preprotein translocase subunit SecE	Bacterial secretion system;Protein export;Quorum sensing	secE, preprotein translocase subunit SecE	K03073	preprotein translocase subunit SecE		CytoplasmicMembrane		control_42C;oxidative_42C;25C_42C;25C_lowpH;25C_agar
2.04169	0	-1.75437	1.33882	0	-2.04169		+	Cluster 152		11	37.2	46.794	0	48.401	346240000	62	2.36543	0.0181099	AFT93363.1	citrate synthase [Francisella tularensis subsp. holarctica FSC200]	FTS_1744	gltA		Energy production and conversion	C	COG0372	GltA	Citrate synthase	2-Oxocarboxylic acid metabolism;Biosynthesis of amino acids;Biosynthesis of antibiotics;Biosynthesis of secondary metabolites;Carbon metabolism;Citrate cycle (TCA cycle);Glyoxylate and dicarboxylate metabolism;Metabolic pathways;Microbial metabolism in diverse environments	CS, citrate synthase [EC:2.3.3.1]	K01647	citrate synthase	GO:0003674;GO:0003824;GO:0004108;GO:0005575;GO:0005622;GO:0005623;GO:0005737;GO:0005829;GO:0005886;GO:0006091;GO:0006099;GO:0008150;GO:0008152;GO:0009060;GO:0009987;GO:0015980;GO:0016020;GO:0016740;GO:0016746;GO:0044237;GO:0044238;GO:0044424;GO:0044444;GO:0044464;GO:0044710;GO:0045333;GO:0046912;GO:0055114;GO:0071944	Cytoplasmic		oxidative_lowpH;control_lowpH;25C_lowpH;oxidative_42C;control_42C;25C_42C;oxidative_agar;control_agar;25C_agar
1.40388	1.71628	-1.71628	0	0	-1.69779		+	Cluster 152		6	40.7	19.982	0	18.255	150890000	40	2.2206	0.0141307	AFT93337.1	transcription antitermination protein nusG [Francisella tularensis subsp. holarctica FSC200]	FTS_1706	nusG		Transcription	K	COG0250	NusG	Transcription antitermination factor NusG		nusG, transcriptional antiterminator NusG	K02601	Participates in transcription elongation, termination and antitermination (By similarity)	GO:0005575;GO:0005618;GO:0005622;GO:0005623;GO:0005634;GO:0005654;GO:0005886;GO:0006139;GO:0006351;GO:0006353;GO:0006355;GO:0006725;GO:0006807;GO:0008023;GO:0008150;GO:0008152;GO:0009058;GO:0009059;GO:0009889;GO:0009987;GO:0010467;GO:0010468;GO:0010556;GO:0016020;GO:0016070;GO:0018130;GO:0019219;GO:0019222;GO:0019438;GO:0030312;GO:0031323;GO:0031326;GO:0031554;GO:0031555;GO:0031564;GO:0031974;GO:…	Cytoplasmic		oxidative_lowpH;control_lowpH;25C_lowpH;control_agar;25C_agar;25C_42C
1.82393	1.81824	-1.54917	0	1.48349	-1.82393		+	Cluster 152		5	9.7	46.355	0	10.093	103690000	30	2.72627	0.0212393	AFT92283.1	monovalent cation:proton antiporter-1 [Francisella tularensis subsp. holarctica FSC200]	FTS_0302	nhaP		Inorganic ion transport and metabolism	P	COG0025	NhaP	NhaP-type Na+/H+ or K+/H+ antiporter		TC.CPA1, monovalent cation:H antiporter, CPA1 family	K03316	Na H antiporter	GO:0003674;GO:0005215;GO:0005451;GO:0005575;GO:0006810;GO:0006811;GO:0006812;GO:0006814;GO:0006818;GO:0008150;GO:0008324;GO:0009987;GO:0015075;GO:0015077;GO:0015078;GO:0015081;GO:0015291;GO:0015297;GO:0015298;GO:0015299;GO:0015385;GO:0015491;GO:0015672;GO:0015992;GO:0016020;GO:0022804;GO:0022857;GO:0022890;GO:0022891;GO:0022892;GO:0030001;GO:0034220;GO:0035725;GO:0044699;GO:0044763;GO:0044765;GO:…	CytoplasmicMembrane		control_lowpH;oxidative_lowpH;25C_lowpH;25C_agar;25C_42C;25C_control
1.39156	0	-2.76461	1.8874	2.76461	-2.55473		+	Cluster 152		7	37.5	27.922	0	33.797	225370000	51	3.07155	0.0106227	AFT92556.1	pantothenate kinase [Francisella tularensis subsp. holarctica FSC200]	FTS_0672			Coenzyme transport and metabolism	H	COG1521	CoaX	Pantothenate kinase type III	Metabolic pathways;Pantothenate and CoA biosynthesis	coaX, type III pantothenate kinase [EC:2.7.1.33]	K03525	Catalyzes the phosphorylation of pantothenate (Pan), the first step in CoA biosynthesis (By similarity)	GO:0005575;GO:0005622;GO:0005623;GO:0005737;GO:0044424;GO:0044464	Cytoplasmic		lowpH_42C;control_42C;agar_42C;oxidative_42C;25C_42C;25C_lowpH;25C_control;25C_agar
-2.34007	4.04207	-3.18125	-4.04207	1.67445	-1.72561		+	Cluster 357		11	20	74.144	0	30.685	210820000	52	3.74852	0.00915415	AFT93404.1	siderophore biosynthesis protein [Francisella tularensis subsp. holarctica FSC200]	FTS_1789	frgA		Secondary metabolites biosynthesis, transport and catabolism	Q							IucA IucC family protein	GO:0003674;GO:0003824;GO:0006082;GO:0006520;GO:0006575;GO:0006807;GO:0008150;GO:0008152;GO:0008652;GO:0009058;GO:0009987;GO:0016053;GO:0016874;GO:0016879;GO:0016881;GO:0019270;GO:0019752;GO:0042398;GO:0043436;GO:0044237;GO:0044238;GO:0044249;GO:0044281;GO:0044283;GO:0044710;GO:0044711;GO:0046394;GO:0046442;GO:0050565;GO:0071704;GO:0072350;GO:0072351;GO:1901564;GO:1901566;GO:1901576	Cytoplasmic		oxidative_42C;lowpH_42C;agar_42C;control_42C;25C_42C;25C_oxidative;25C_lowpH
-1.50134	3.24227	-3.24227	-3.07916	1.59194	-1.69311		+	Cluster 357		5	38.9	18.839	0	18.229	154110000	29	3.31317	0.0189542	AFT93356.1	adenine phosphoribosyltransferase [Francisella tularensis subsp. holarctica FSC200]	FTS_1737	apt		Nucleotide transport and metabolism	F	COG0503	Apt	Adenine/guanine phosphoribosyltransferase or related PRPP-binding protein	Metabolic pathways;Purine metabolism	APRT, adenine phosphoribosyltransferase [EC:2.4.2.7]	K00759	Catalyzes a salvage reaction resulting in the formation of AMP, that is energically less costly than de novo synthesis (By similarity)	GO:0000287;GO:0003674;GO:0003824;GO:0003999;GO:0005488;GO:0005515;GO:0005575;GO:0005622;GO:0005623;GO:0005737;GO:0005829;GO:0005886;GO:0006139;GO:0006144;GO:0006166;GO:0006168;GO:0006725;GO:0006807;GO:0008150;GO:0008152;GO:0009058;GO:0009112;GO:0009113;GO:0009116;GO:0009119;GO:0009163;GO:0009987;GO:0016020;GO:0016740;GO:0016757;GO:0016763;GO:0018130;GO:0019438;GO:0034641;GO:0034654;GO:0042278;GO:…	Cytoplasmic		oxidative_42C;lowpH_42C;agar_42C;control_42C;25C_42C;25C_oxidative;25C_lowpH
-1.86636	2.83471	-2.83471	-2.39385	1.63312	-1.62277		+	Cluster 357		6	31.1	25.593	0	24	237480000	23	2.954	0.00986466	AFT93467.1	ATP-binding cassette (ABC) superfamily protein [Francisella tularensis subsp. holarctica FSC200]	FTS_1882			Inorganic ion transport and metabolism	P	COG1121	ZnuC	ABC-type Mn2+/Zn2+ transport system, ATPase component		ABC.ZM.A, zinc/manganese transport system ATP-binding protein	K02074	abc transporter atp-binding protein	GO:0005575;GO:0005623;GO:0005886;GO:0016020;GO:0044464;GO:0071944	CytoplasmicMembrane		25C_42C;agar_42C;control_42C;25C_lowpH;agar_lowpH;control_lowpH;agar_oxidative;control_oxidative;control_25C
-1.42407	3.14401	-1.90616	-2.37497	2.23409	-3.14401		+	Cluster 357		3	20.4	23.801	0	27.886	186190000	30	3.2378	0.0162945	AFT92520.1	homoserine/threonine efflux family protein [Francisella tularensis subsp. holarctica FSC200]	FTS_0626	rhtB		Amino acid transport and metabolism	E							lysine exporter protein LysE YggA	GO:0005575;GO:0005623;GO:0005886;GO:0016020;GO:0044464;GO:0071944	CytoplasmicMembrane		agar_42C;control_42C;25C_42C;agar_lowpH;control_lowpH;25C_lowpH;25C_oxidative
-3.51243	3.80261	-2.71998	-3.80261	-3.48909	2.84271		+	Cluster 148		7	51.8	21.938	0	24.472	190720000	30	4.45173	0.0148987	AFT92797.1	haloacid dehalogenase-like hydrolase [Francisella tularensis subsp. holarctica FSC200]	FTS_0975	yqaB		Function unknown	S							phosphatase	GO:0000287;GO:0003674;GO:0003824;GO:0005488;GO:0006793;GO:0006796;GO:0008150;GO:0008152;GO:0008801;GO:0009987;GO:0016311;GO:0016787;GO:0016788;GO:0016791;GO:0016853;GO:0016866;GO:0016868;GO:0042578;GO:0043167;GO:0043169;GO:0044237;GO:0046872	Cytoplasmic		42C_lowpH;oxidative_lowpH;control_lowpH;agar_lowpH;25C_lowpH;25C_42C;25C_oxidative;25C_control
-2.35722	2.03467	-1.72646	-2.35116	0	2.35722		+	Cluster 148		6	20.9	43.447	0	26.426	87878000	30	3.04441	0.0190981	AFT93080.1	galactokinase [Francisella tularensis subsp. holarctica FSC200]	FTS_1365	galK		Carbohydrate transport and metabolism	G	COG0153	GalK	Galactokinase	Amino sugar and nucleotide sugar metabolism;Galactose metabolism;Metabolic pathways	galK, galactokinase [EC:2.7.1.6]	K00849	Catalyzes the transfer of the gamma-phosphate of ATP to D-galactose to form alpha-D-galactose-1-phosphate (Gal-1-P) (By similarity)	GO:0000287;GO:0003674;GO:0003824;GO:0004335;GO:0005488;GO:0005575;GO:0005622;GO:0005623;GO:0005737;GO:0005975;GO:0005996;GO:0006012;GO:0006793;GO:0006796;GO:0008150;GO:0008152;GO:0009056;GO:0009987;GO:0016052;GO:0016301;GO:0016310;GO:0016740;GO:0016772;GO:0016773;GO:0019200;GO:0019318;GO:0019320;GO:0019388;GO:0033499;GO:0043167;GO:0043169;GO:0044237;GO:0044238;GO:0044262;GO:0044424;GO:0044464;GO:…	Cytoplasmic		oxidative_42C;agar_42C;25C_42C;control_42C;25C_lowpH;control_lowpH;control_oxidative;control_agar
-1.75376	3.59343	-3.59343	-1.9527	2.22162	1.35128		+	Cluster 346		27	47.5	86.022	0	114.13	571300000	103	3.24438	0.004	AFT92469.1	ribonuclease R [Francisella tularensis subsp. holarctica FSC200]	FTS_0557	rnr		Transcription	K	COG0557	VacB	Exoribonuclease R	RNA degradation	rnr, ribonuclease R [EC:3.1.-.-]	K12573	3'-5' exoribonuclease that releases 5'-nucleoside monophosphates and is involved in maturation of structured RNAs (By similarity)	GO:0000154;GO:0000175;GO:0003674;GO:0003824;GO:0004518;GO:0004527;GO:0004532;GO:0004540;GO:0005575;GO:0005622;GO:0005623;GO:0005737;GO:0006139;GO:0006364;GO:0006396;GO:0006725;GO:0006807;GO:0008150;GO:0008152;GO:0008408;GO:0008997;GO:0009451;GO:0009987;GO:0010467;GO:0016070;GO:0016071;GO:0016072;GO:0016556;GO:0016787;GO:0016788;GO:0016796;GO:0016896;GO:0022613;GO:0034470;GO:0034641;GO:0034660;GO:…	Cytoplasmic		oxidative_lowpH;control_lowpH;25C_lowpH;agar_lowpH;oxidative_42C;control_42C;25C_42C;agar_42C;control_oxidative;25C_oxidative;agar_oxidative;25C_control;agar_control
-2.51601	3.43053	-2.5875	-3.43053	3.25632	3.2966		+	Cluster 346		12	56.7	24.51	0	88.883	1896300000	189	4.45156	0.0273318	AFT93335.1	50S ribosomal protein L1 [Francisella tularensis subsp. holarctica FSC200]	FTS_1704	rplA		Translation, ribosomal structure and biogenesis	J	COG0081	RplA	Ribosomal protein L1	Ribosome	RP-L1, large subunit ribosomal protein L1	K02863	Binds directly to 23S rRNA. The L1 stalk is quite mobile in the ribosome, and is involved in E site tRNA release (By similarity)	GO:0003674;GO:0003735;GO:0005198;GO:0005575;GO:0005618;GO:0005622;GO:0005623;GO:0005737;GO:0005829;GO:0005886;GO:0006412;GO:0006417;GO:0006446;GO:0008150;GO:0008152;GO:0009058;GO:0009059;GO:0009889;GO:0009890;GO:0009892;GO:0009987;GO:0010467;GO:0010468;GO:0010556;GO:0010558;GO:0010605;GO:0010608;GO:0016020;GO:0017148;GO:0019222;GO:0019538;GO:0030312;GO:0031323;GO:0031324;GO:0031326;GO:0031327;GO:…	Cytoplasmic		42C_lowpH;oxidative_lowpH;control_lowpH;agar_lowpH;25C_lowpH;agar_42C;25C_42C;agar_oxidative;25C_oxidative;agar_control;25C_control
-2.99426	4.24036	-2.5395	-4.24036	2.625	3.1371		+	Cluster 346		5	40.7	19.081	0	34.917	233600000	27	4.2736	0.0114618	AFT92758.1	hypothetical protein FTS_0923 [Francisella tularensis subsp. holarctica FSC200]	FTS_0923			Secondary metabolites biosynthesis, transport and catabolism	Q							isochorismatase hydrolase		Cytoplasmic		42C_lowpH;oxidative_lowpH;agar_lowpH;control_lowpH;25C_lowpH;agar_42C;control_42C;25C_42C;agar_oxidative;control_oxidative;25C_oxidative
-3.25635	4.56805	-2.60206	-4.56805	2.79535	2.02945		+	Cluster 346		20	74.2	44.02	0	182.04	1903600000	194	4.27613	0.00524272	AFT92894.1	beta-ketoacyl-ACP synthase II [Francisella tularensis subsp. holarctica FSC200]	FTS_1108	fabF		Lipid transport and metabolism;Secondary metabolites biosynthesis, transport and catabolism	I;Q	COG0304	FabB	3-oxoacyl-(acyl-carrier-protein) synthase	Biotin metabolism;Fatty acid metabolism;Galactose metabolism;Metabolic pathways	fabF, 3-oxoacyl-[acyl-carrier-protein] synthase II [EC:2.3.1.179]	K09458	Catalyzes the condensation reaction of fatty acid synthesis by the addition to an acyl acceptor of two carbons from malonyl-ACP (By similarity)	GO:0003674;GO:0003824;GO:0004312;GO:0004315;GO:0005575;GO:0005622;GO:0005623;GO:0005737;GO:0005829;GO:0006082;GO:0006629;GO:0006631;GO:0006633;GO:0008150;GO:0008152;GO:0008610;GO:0009058;GO:0009987;GO:0016053;GO:0016740;GO:0016746;GO:0016747;GO:0019752;GO:0032787;GO:0033817;GO:0043436;GO:0044237;GO:0044238;GO:0044249;GO:0044255;GO:0044281;GO:0044283;GO:0044424;GO:0044444;GO:0044464;GO:0044710;GO:…	Cytoplasmic		42C_lowpH;oxidative_lowpH;agar_lowpH;control_lowpH;25C_lowpH;agar_42C;control_42C;25C_42C;25C_oxidative;25C_agar;25C_control
3.6471	2.47396	-4.64999	-3.83868	-2.92659	4.64999		+	Cluster 406		33	43.8	95.338	0	160.94	1401700000	157	4.83956	0.00930041	AFT92923.1;AFT92135.1	PdpA protein [Francisella tularensis subsp. holarctica FSC200];PdpA protein [Francisella tularensis subsp. holarctica FSC200]	FTS_1141;FTS_0113	pdpA2;pdpA1												Unknown		oxidative_lowpH;agar_lowpH;control_lowpH;25C_lowpH;oxidative_42C;agar_42C;control_42C;25C_42C;agar_oxidative;control_oxidative;25C_oxidative
2.24071	3.57304	-3.57304	-3.42973	-2.07486	2.34616		+	Cluster 406		10	38.3	38.256	0	104.28	498210000	83	4.01484	0.0063814	AFT93442.1	glutamine synthetase [Francisella tularensis subsp. holarctica FSC200]	FTS_1848	glnA		Amino acid transport and metabolism	E	COG0174	GlnA	Glutamine synthetase	Alanine, aspartate and glutamate metabolism;Arginine biosynthesis;Biosynthesis of amino acids;Glyoxylate and dicarboxylate metabolism;Metabolic pathways;Microbial metabolism in diverse environments;Nitrogen metabolism;Two-component system	glnA, glutamine synthetase [EC:6.3.1.2]	K01915	glutamine synthetase	GO:0003674;GO:0003824;GO:0004356;GO:0005575;GO:0005622;GO:0005623;GO:0005737;GO:0005829;GO:0006082;GO:0006520;GO:0006536;GO:0006541;GO:0006542;GO:0006725;GO:0006807;GO:0008150;GO:0008152;GO:0008652;GO:0009058;GO:0009064;GO:0009084;GO:0009987;GO:0016020;GO:0016053;GO:0016211;GO:0016853;GO:0016866;GO:0016874;GO:0016879;GO:0016880;GO:0019676;GO:0019740;GO:0019752;GO:0034022;GO:0042537;GO:0043436;GO:…	Cytoplasmic		oxidative_42C;control_42C;25C_42C;agar_42C;control_lowpH;25C_lowpH;agar_lowpH;25C_oxidative;agar_oxidative;25C_control;agar_control
3.80815	4.65167	-2.34835	-4.65167	-2.23257	2.08493		+	Cluster 406		14	38.1	44.382	0	42.813	470530000	58	4.41991	0.00912698	AFT92331.1	aspartate aminotransferase [Francisella tularensis subsp. holarctica FSC200]	FTS_0376	aspC1		Amino acid transport and metabolism	E	COG0436	AspB	Aspartate/methionine/tyrosine aminotransferase	2-Oxocarboxylic acid metabolism;Alanine, aspartate and glutamate metabolism;Arginine and proline metabolism;Arginine biosynthesis;Biosynthesis of amino acids;Biosynthesis of antibiotics;Biosynthesis of secondary metabolites;Cysteine and methionine metabolism;Metabolic pathways;Phenylalanine metabolism;Phenylalanine, tyrosine and tryptophan biosynthesis	aspB, aspartate aminotransferase [EC:2.6.1.1]	K00812	Aminotransferase	GO:0003674;GO:0003824;GO:0004021;GO:0004069;GO:0005575;GO:0005622;GO:0005623;GO:0005737;GO:0006082;GO:0006090;GO:0006520;GO:0006522;GO:0006523;GO:0006531;GO:0006532;GO:0006807;GO:0006950;GO:0006974;GO:0008150;GO:0008152;GO:0008483;GO:0008652;GO:0009058;GO:0009066;GO:0009067;GO:0009078;GO:0009079;GO:0009636;GO:0009987;GO:0016053;GO:0016740;GO:0016769;GO:0019272;GO:0019752;GO:0030632;GO:0032787;GO:…	Cytoplasmic		oxidative_42C;control_42C;agar_42C;25C_42C;control_lowpH;agar_lowpH;25C_lowpH;25C_oxidative;25C_control;25C_agar
1.64105	2.82502	-4.06923	-3.20505	-1.78934	4.06923		+	Cluster 406		9	24.5	40.828	0	17.271	271440000	41	4.01176	0.00739726	AFT93090.1	undecaprenyldiphospho-muramoylpentapeptide beta-N- acetylglucosaminyltransferase [Francisella tularensis subsp. holarctica FSC200]	FTS_1379	murG		Cell wall/membrane/envelope biogenesis	M	COG0707	MurG	UDP-N-acetylglucosamine:LPS N-acetylglucosamine transferase	Metabolic pathways;Peptidoglycan biosynthesis;Vancomycin resistance	murG, UDP-N-acetylglucosamine--N-acetylmuramyl-(pentapeptide) pyrophosphoryl-undecaprenol N-acetylglucosamine transferase [EC:2.4.1.227]	K02563	Cell wall formation. Catalyzes the transfer of a GlcNAc subunit on undecaprenyl-pyrophosphoryl-MurNAc-pentapeptide (lipid intermediate I) to form undecaprenyl-pyrophosphoryl-MurNAc- (pentapeptide)GlcNAc (lipid intermediate II) (By similarity)	GO:0000270;GO:0003674;GO:0003824;GO:0005575;GO:0005623;GO:0005886;GO:0006022;GO:0006023;GO:0006024;GO:0006807;GO:0008150;GO:0008152;GO:0008194;GO:0008375;GO:0009058;GO:0009059;GO:0009252;GO:0009273;GO:0009987;GO:0016020;GO:0016740;GO:0016757;GO:0016758;GO:0030203;GO:0034645;GO:0040007;GO:0042546;GO:0043170;GO:0044036;GO:0044038;GO:0044085;GO:0044237;GO:0044249;GO:0044260;GO:0044464;GO:0044699;GO:…	CytoplasmicMembrane		oxidative_42C;control_42C;25C_42C;agar_42C;control_lowpH;25C_lowpH;agar_lowpH;25C_oxidative;agar_oxidative
7.72562	7.57038	-7.71354	-7.72562	-4.69561	6.29443		+	Cluster 406		5	42.7	13.814	0	104.82	719380000	43	8.82008	0	AFT92219.1	30S ribosomal protein S12 [Francisella tularensis subsp. holarctica FSC200]	FTS_0229	rpsL		Translation, ribosomal structure and biogenesis	J	COG0048	RpsL	Ribosomal protein S12	Ribosome	RP-S12, small subunit ribosomal protein S12	K02950	Interacts with and stabilizes bases of the 16S rRNA that are involved in tRNA selection in the A site and with the mRNA backbone. Located at the interface of the 30S and 50S subunits, it traverses the body of the 30S subunit contacting proteins on the other side and probably holding the rRNA structure together. The combined cluster of proteins S8, S12 and S17 appears to hold together the shoulder…	GO:0000372;GO:0000375;GO:0000376;GO:0003674;GO:0003676;GO:0003723;GO:0003735;GO:0005198;GO:0005488;GO:0005575;GO:0005622;GO:0005623;GO:0005737;GO:0005829;GO:0005840;GO:0006139;GO:0006396;GO:0006412;GO:0006725;GO:0006807;GO:0008150;GO:0008152;GO:0008380;GO:0009058;GO:0009059;GO:0009893;GO:0009987;GO:0010467;GO:0010468;GO:0010604;GO:0015935;GO:0016070;GO:0019219;GO:0019222;GO:0019538;GO:0019843;GO:…	Cytoplasmic		oxidative_42C;control_42C;agar_42C;25C_42C;oxidative_lowpH;control_lowpH;agar_lowpH;25C_lowpH;agar_oxidative;25C_oxidative;agar_control;25C_control
5.3555	6.05446	-4.36204	-6.05446	-3.07545	3.49199		+	Cluster 406		13	27.3	65.033	0	45.682	237050000	68	6.05462	0.00393514	AFT92919.1;AFT92131.1	hypothetical protein FTS_1137 [Francisella tularensis subsp. holarctica FSC200];hypothetical protein FTS_0109 [Francisella tularensis subsp. holarctica FSC200]	FTS_1137;FTS_0109													Cytoplasmic		oxidative_42C;control_42C;agar_42C;25C_42C;oxidative_lowpH;control_lowpH;agar_lowpH;25C_lowpH;agar_oxidative;25C_oxidative;agar_control;25C_control
4.61976	5.65416	-3.75083	-5.65416	-2.92588	5.43888		+	Cluster 406		19	36.4	52.717	0	242.94	2079600000	173	5.9951	0.00110204	AFT93357.1	2-oxoglutarate dehydrogenase complex, E2 component, dihydrolipoyltranssuccinase [Francisella tularensis subsp. holarctica FSC200]	FTS_1738	sucB		Energy production and conversion	C	COG0508	AceF	Pyruvate/2-oxoglutarate dehydrogenase complex, dihydrolipoamide acyltransferase (E2) component	Biosynthesis of antibiotics;Biosynthesis of secondary metabolites;Carbon metabolism;Citrate cycle (TCA cycle);Lysine degradation;Metabolic pathways;Microbial metabolism in diverse environments	DLST, 2-oxoglutarate dehydrogenase E2 component (dihydrolipoamide succinyltransferase) [EC:2.3.1.61]	K00658	dihydrolipoamide succinyltransferase	GO:0003674;GO:0003824;GO:0004149;GO:0005488;GO:0005504;GO:0005575;GO:0005622;GO:0005623;GO:0005737;GO:0006091;GO:0006099;GO:0008150;GO:0008152;GO:0008289;GO:0009060;GO:0009987;GO:0015980;GO:0016417;GO:0016740;GO:0016746;GO:0016747;GO:0016748;GO:0016751;GO:0031405;GO:0031406;GO:0032991;GO:0033293;GO:0043167;GO:0043168;GO:0043234;GO:0044237;GO:0044238;GO:0044424;GO:0044444;GO:0044464;GO:0044710;GO:…	Cytoplasmic		oxidative_42C;control_42C;25C_42C;agar_42C;oxidative_lowpH;control_lowpH;25C_lowpH;agar_lowpH;25C_oxidative;agar_oxidative;25C_control;agar_control
4.36592	7.15754	-5.52877	-7.15754	-4.15281	4.42011		+	Cluster 406		11	19.3	67.385	0	31.257	255730000	48	6.69167	0.00105495	AFT92851.1	1-deoxy-D-xylulose-5-phosphate synthase [Francisella tularensis subsp. holarctica FSC200]	FTS_1045	dxs		Coenzyme transport and metabolism;Lipid transport and metabolism	H;I	COG1154	Dxs	Deoxyxylulose-5-phosphate synthase	Biosynthesis of antibiotics;Biosynthesis of secondary metabolites;Metabolic pathways;Terpenoid backbone biosynthesis;Thiamine metabolism	dxs, 1-deoxy-D-xylulose-5-phosphate synthase [EC:2.2.1.7]	K01662	Catalyzes the acyloin condensation reaction between C atoms 2 and 3 of pyruvate and glyceraldehyde 3-phosphate to yield 1-deoxy-D-xylulose-5-phosphate (DXP) (By similarity)	GO:0000287;GO:0003674;GO:0003824;GO:0005488;GO:0005575;GO:0005622;GO:0005623;GO:0005737;GO:0005829;GO:0006081;GO:0006082;GO:0006090;GO:0006629;GO:0006644;GO:0006720;GO:0006725;GO:0006732;GO:0006733;GO:0006743;GO:0006744;GO:0006766;GO:0006767;GO:0006772;GO:0006790;GO:0006793;GO:0006796;GO:0006807;GO:0008150;GO:0008152;GO:0008299;GO:0008610;GO:0008614;GO:0008615;GO:0008654;GO:0008661;GO:0009058;GO:…	Cytoplasmic		42C_lowpH;oxidative_lowpH;agar_lowpH;control_lowpH;25C_lowpH;oxidative_42C;agar_42C;control_42C;25C_42C;25C_oxidative;25C_agar;25C_control
4.71358	6.09631	-5.52938	-6.09631	-3.52598	5.57134		+	Cluster 406		29	59.6	64.007	0	193.17	1454000000	203	6.73534	0	AFT93075.1	DEAD-box subfamily ATP-dependent helicase [Francisella tularensis subsp. holarctica FSC200]	FTS_1360	deaD		Replication, recombination and repair	L	COG0513	SrmB	Superfamily II DNA and RNA helicase	RNA degradation	deaD, ATP-dependent RNA helicase DeaD [EC:3.6.4.13]	K05592	ATP-dependent RNA helicase	GO:0000027;GO:0000910;GO:0003674;GO:0003676;GO:0003723;GO:0003724;GO:0003824;GO:0004004;GO:0004386;GO:0005488;GO:0005575;GO:0005622;GO:0005623;GO:0005737;GO:0006139;GO:0006152;GO:0006163;GO:0006195;GO:0006200;GO:0006355;GO:0006401;GO:0006725;GO:0006753;GO:0006793;GO:0006796;GO:0006807;GO:0006950;GO:0006996;GO:0007049;GO:0008026;GO:0008150;GO:0008152;GO:0008186;GO:0009056;GO:0009057;GO:0009116;GO:…	Cytoplasmic		42C_lowpH;agar_lowpH;25C_lowpH;control_lowpH;oxidative_lowpH;agar_42C;25C_42C;control_42C;oxidative_42C;25C_agar;control_agar;oxidative_agar
5.078	4.92646	-5.078	-4.37705	-3.07462	2.80727		+	Cluster 406		64	58.2	151.33	0	323.31	3742300000	446	5.69587	0	AFT93332.1	DNA-directed RNA polymerase subunit beta [Francisella tularensis subsp. holarctica FSC200]	FTS_1701	rpoB		Transcription	K	COG0085	RpoB	DNA-directed RNA polymerase, beta subunit/140 kD subunit	Metabolic pathways;Purine metabolism;Pyrimidine metabolism;RNA polymerase	rpoB, DNA-directed RNA polymerase subunit beta [EC:2.7.7.6]	K03043	DNA-dependent RNA polymerase catalyzes the transcription of DNA into RNA using the four ribonucleoside triphosphates as substrates (By similarity)	GO:0003674;GO:0003824;GO:0003899;GO:0005575;GO:0005622;GO:0005623;GO:0005737;GO:0006139;GO:0006725;GO:0006807;GO:0008150;GO:0008152;GO:0009058;GO:0009059;GO:0009987;GO:0016020;GO:0016070;GO:0016740;GO:0016772;GO:0016779;GO:0018130;GO:0019438;GO:0032774;GO:0034062;GO:0034641;GO:0034654;GO:0043170;GO:0044237;GO:0044238;GO:0044249;GO:0044260;GO:0044271;GO:0044424;GO:0044464;GO:0046483;GO:0071704;GO:…	Cytoplasmic		42C_lowpH;agar_lowpH;control_lowpH;oxidative_lowpH;25C_lowpH;control_42C;oxidative_42C;25C_42C;25C_agar;25C_control;25C_oxidative
5.48002	5.28819	-5.48002	-4.60191	-3.33715	3.71207		+	Cluster 406		68	52.2	157.39	0	323.31	4748100000	477	6.07344	0	AFT93331.1	DNA-directed RNA polymerase, beta' subunit [Francisella tularensis subsp. holarctica FSC200]	FTS_1700	rpoC		Transcription	K	COG0086	RpoC	DNA-directed RNA polymerase, beta' subunit/160 kD subunit	Metabolic pathways;Purine metabolism;Pyrimidine metabolism;RNA polymerase	rpoC, DNA-directed RNA polymerase subunit beta' [EC:2.7.7.6]	K03046	DNA-dependent RNA polymerase catalyzes the transcription of DNA into RNA using the four ribonucleoside triphosphates as substrates (By similarity)	GO:0003674;GO:0003824;GO:0003899;GO:0005575;GO:0005618;GO:0005622;GO:0005623;GO:0005737;GO:0005886;GO:0006139;GO:0006725;GO:0006807;GO:0008150;GO:0008152;GO:0009058;GO:0009059;GO:0009987;GO:0016020;GO:0016070;GO:0016740;GO:0016772;GO:0016779;GO:0018130;GO:0019438;GO:0030312;GO:0032774;GO:0034062;GO:0034641;GO:0034654;GO:0040007;GO:0043170;GO:0044237;GO:0044238;GO:0044249;GO:0044260;GO:0044271;GO:…	Cytoplasmic		lowpH_42C;agar_42C;control_42C;25C_42C;oxidative_42C;agar_lowpH;control_lowpH;25C_lowpH;oxidative_lowpH;control_agar;25C_agar;oxidative_agar
6.76519	7.08708	-7.08708	-6.9211	-4.33782	5.03043		+	Cluster 406		16	56	35.357	0	149.36	1118400000	101	7.93537	0	AFT92248.1	DNA-directed RNA polymerase subunit alpha [Francisella tularensis subsp. holarctica FSC200]	FTS_0258	rpoA		Transcription	K	COG0202	RpoA	DNA-directed RNA polymerase, alpha subunit/40 kD subunit	Metabolic pathways;Purine metabolism;Pyrimidine metabolism;RNA polymerase	rpoA, DNA-directed RNA polymerase subunit alpha [EC:2.7.7.6]	K03040	DNA-dependent RNA polymerase catalyzes the transcription of DNA into RNA using the four ribonucleoside triphosphates as substrates (By similarity)	GO:0003674;GO:0003824;GO:0003899;GO:0005575;GO:0005618;GO:0005622;GO:0005623;GO:0005737;GO:0005829;GO:0005886;GO:0006139;GO:0006725;GO:0006807;GO:0008150;GO:0008152;GO:0009058;GO:0009059;GO:0009987;GO:0016020;GO:0016070;GO:0016740;GO:0016772;GO:0016779;GO:0018130;GO:0019438;GO:0030312;GO:0032774;GO:0034062;GO:0034641;GO:0034654;GO:0040007;GO:0043170;GO:0044237;GO:0044238;GO:0044249;GO:0044260;GO:…	Cytoplasmic		agar_lowpH;25C_lowpH;control_lowpH;oxidative_lowpH;agar_42C;25C_42C;control_42C;oxidative_42C;control_agar;oxidative_agar
5.85099	6.67751	-6.67751	-6.41098	-3.73123	3.82462		+	Cluster 406		7	56.8	12.848	0	66.613	1138400000	74	7.19137	0	AFT93333.1	50S ribosomal protein L7/L12 [Francisella tularensis subsp. holarctica FSC200]	FTS_1702	rplL		Translation, ribosomal structure and biogenesis	J	COG0222	RplL	Ribosomal protein L7/L12	Ribosome	RP-L7, large subunit ribosomal protein L7/L12	K02935	Seems to be the binding site for several of the factors involved in protein synthesis and appears to be essential for accurate translation (By similarity)	GO:0003674;GO:0003735;GO:0005198;GO:0005575;GO:0005618;GO:0005622;GO:0005623;GO:0005737;GO:0005829;GO:0005840;GO:0005886;GO:0006412;GO:0008150;GO:0008152;GO:0009058;GO:0009059;GO:0009987;GO:0010467;GO:0015934;GO:0016020;GO:0019538;GO:0022625;GO:0022626;GO:0030312;GO:0030529;GO:0032991;GO:0034645;GO:0040007;GO:0043170;GO:0043226;GO:0043228;GO:0043229;GO:0043232;GO:0044237;GO:0044238;GO:0044249;GO:…	Unknown		agar_lowpH;control_lowpH;oxidative_lowpH;25C_lowpH;agar_42C;control_42C;oxidative_42C;25C_42C;control_agar;oxidative_agar;25C_agar
6.18205	6.07562	-6.18205	-6.08542	-4.31159	3.94238		+	Cluster 406		18	53.3	35.074	0	77.798	985270000	118	7.18218	0	AFT92511.1	DNA-directed RNA polymerase subunit alpha [Francisella tularensis subsp. holarctica FSC200]	FTS_0614	rpoA2		Transcription	K	COG0202	RpoA	DNA-directed RNA polymerase, alpha subunit/40 kD subunit	Metabolic pathways;Purine metabolism;Pyrimidine metabolism;RNA polymerase	rpoA, DNA-directed RNA polymerase subunit alpha [EC:2.7.7.6]	K03040	DNA-dependent RNA polymerase catalyzes the transcription of DNA into RNA using the four ribonucleoside triphosphates as substrates (By similarity)	GO:0005575;GO:0005618;GO:0005622;GO:0005623;GO:0005737;GO:0005829;GO:0005886;GO:0008150;GO:0016020;GO:0030312;GO:0040007;GO:0044424;GO:0044444;GO:0044464;GO:0071944	Cytoplasmic		oxidative_lowpH;agar_lowpH;control_lowpH;25C_lowpH;oxidative_42C;agar_42C;control_42C;25C_42C;25C_oxidative;25C_agar;25C_control
7.81488	9.23585	-8.12413	-9.23585	7.04738	7.97457		+	Cluster 407		6	35.6	13.348	0	88.152	1421500000	77	9.51186	0	AFT93085.1	50S ribosomal protein L20 [Francisella tularensis subsp. holarctica FSC200]	FTS_1372	rplT		Translation, ribosomal structure and biogenesis	J	COG0292	RplT	Ribosomal protein L20	Ribosome	RP-L20, large subunit ribosomal protein L20	K02887	Binds directly to 23S ribosomal RNA and is necessary for the in vitro assembly process of the 50S ribosomal subunit. It is not involved in the protein synthesizing functions of that subunit (By similarity)	GO:0000027;GO:0000900;GO:0003674;GO:0003676;GO:0003735;GO:0005198;GO:0005488;GO:0005575;GO:0005622;GO:0005623;GO:0005737;GO:0005829;GO:0005840;GO:0005886;GO:0006412;GO:0006417;GO:0006996;GO:0008150;GO:0008152;GO:0009058;GO:0009059;GO:0009889;GO:0009890;GO:0009892;GO:0009987;GO:0010467;GO:0010468;GO:0010556;GO:0010558;GO:0010605;GO:0010608;GO:0015934;GO:0016020;GO:0016043;GO:0017148;GO:0019222;GO:…	Cytoplasmic		control_lowpH;oxidative_lowpH;agar_lowpH;25C_lowpH;control_42C;oxidative_42C;agar_42C;25C_42C;25C_control;25C_oxidative
6.9117	8.42804	-6.28357	-8.6489	8.6489	8.56179		+	Cluster 407		9	58.6	16.784	0	121.87	4766300000	224	9.24907	0	AFT92249.1	50S ribosomal protein L17 [Francisella tularensis subsp. holarctica FSC200]	FTS_0259	rplQ		Translation, ribosomal structure and biogenesis	J	COG0203	RplQ	Ribosomal protein L17	Ribosome	RP-L17, large subunit ribosomal protein L17	K02879	50S ribosomal protein L17	GO:0003674;GO:0003735;GO:0005198;GO:0005575;GO:0005618;GO:0005623;GO:0005886;GO:0006412;GO:0008150;GO:0008152;GO:0009058;GO:0009059;GO:0009987;GO:0010467;GO:0016020;GO:0019538;GO:0030312;GO:0034645;GO:0043170;GO:0044237;GO:0044238;GO:0044249;GO:0044260;GO:0044267;GO:0044464;GO:0071704;GO:0071944;GO:1901576	Cytoplasmic		control_lowpH;oxidative_lowpH;agar_lowpH;25C_lowpH;control_42C;oxidative_42C;agar_42C;25C_42C;agar_control;25C_control;25C_oxidative
6.2822	9.59113	-7.17259	-9.59113	7.14248	7.03094		+	Cluster 407		10	50.9	33.41	0	114.85	1219500000	140	9.02323	0	AFT92366.1	hypothetical protein FTS_0421 [Francisella tularensis subsp. holarctica FSC200]	FTS_0421			Lipid transport and metabolism	I							Hemolysin	GO:0005575;GO:0005576	Extracellular		42C_lowpH;agar_lowpH;control_lowpH;oxidative_lowpH;25C_lowpH;agar_42C;control_42C;oxidative_42C;25C_42C;25C_agar;25C_control;25C_oxidative
5.66662	7.78951	-7.9551	-5.89808	7.9551	7.10928		+	Cluster 407		17	53.9	21.986	0	303.97	8439200000	339	8.35395	0.00342857	AFT92316.1	LemA-like protein [Francisella tularensis subsp. holarctica FSC200]	FTS_0355	lemA		Function unknown	S	COG1704	LemA	Uncharacterized conserved protein		lemA, LemA protein	K03744	LemA protein		Cytoplasmic		42C_lowpH;control_lowpH;oxidative_lowpH;agar_lowpH;25C_lowpH;control_42C;oxidative_42C;agar_42C;25C_42C;25C_control;25C_oxidative;25C_agar
5.25248	6.34064	-6.77311	-7.18301	7.18301	6.88214		+	Cluster 407		5	52.8	11.289	0	57.29	402020000	55	8.12764	0.00161345	AFT92982.1	hypothetical protein FTS_1223 [Francisella tularensis subsp. holarctica FSC200]	FTS_1223			Function unknown	S							UPF0145 protein		Unknown		42C_lowpH;control_lowpH;agar_lowpH;oxidative_lowpH;25C_lowpH;control_42C;agar_42C;oxidative_42C;25C_42C;25C_control;25C_agar;25C_oxidative
4.87125	7.53848	-6.66859	-7.53848	7.25391	6.42544		+	Cluster 407		5	46.2	8.9393	0	23.862	1590000000	82	8.20872	0.00106383	AFT92441.1	50S ribosomal protein L28 [Francisella tularensis subsp. holarctica FSC200]	FTS_0523	rpmB		Translation, ribosomal structure and biogenesis	J	COG0227	RpmB	Ribosomal protein L28	Ribosome	RP-L28, large subunit ribosomal protein L28	K02902	50S ribosomal protein L28	GO:0003674;GO:0003735;GO:0005198;GO:0006412;GO:0008150;GO:0008152;GO:0009058;GO:0009059;GO:0009987;GO:0010467;GO:0019538;GO:0034645;GO:0043170;GO:0044237;GO:0044238;GO:0044249;GO:0044260;GO:0044267;GO:0071704;GO:1901576	Cytoplasmic		42C_lowpH;control_lowpH;oxidative_lowpH;agar_lowpH;25C_lowpH;control_42C;oxidative_42C;agar_42C;25C_42C;25C_control;25C_oxidative
5.73886	7.47645	-7.42831	-7.47645	5.37642	5.86333		+	Cluster 407		6	33.3	10.147	0	58.675	338020000	59	8.09038	0	AFT92093.1	30S ribosomal protein S20 [Francisella tularensis subsp. holarctica FSC200]	FTS_0062	rpsT		Translation, ribosomal structure and biogenesis	J	COG0268	RpsT	Ribosomal protein S20	Ribosome	RP-S20, small subunit ribosomal protein S20	K02968	Binds directly to 16S ribosomal RNA (By similarity)	GO:0003674;GO:0003676;GO:0003723;GO:0003735;GO:0004857;GO:0005198;GO:0005488;GO:0005575;GO:0005622;GO:0005623;GO:0005737;GO:0005829;GO:0005840;GO:0006412;GO:0008073;GO:0008150;GO:0008152;GO:0009058;GO:0009059;GO:0009987;GO:0010467;GO:0015935;GO:0019222;GO:0019538;GO:0019843;GO:0022626;GO:0022627;GO:0030234;GO:0030529;GO:0032991;GO:0034645;GO:0040007;GO:0042979;GO:0043086;GO:0043170;GO:0043226;GO:…	Cytoplasmic		control_lowpH;agar_lowpH;oxidative_lowpH;25C_lowpH;control_42C;agar_42C;oxidative_42C;25C_42C;25C_control;25C_agar;25C_oxidative
6.38224	7.55578	-6.78841	-7.55578	5.72397	5.01881		+	Cluster 407		23	62.5	41.599	0	323.31	4193000000	303	7.84586	0.00222901	AFT92494.1	galacturonosyl transferase [Francisella tularensis subsp. holarctica FSC200]	FTS_0594			Cell wall/membrane/envelope biogenesis	M	COG0438	RfaB	Glycosyltransferase involved in cell wall bisynthesis		wbtD, galacturonosyltransferase [EC:2.4.1.-]	K13004	glycosyl transferase group 1		Cytoplasmic		control_lowpH;agar_lowpH;oxidative_lowpH;25C_lowpH;control_42C;agar_42C;oxidative_42C;25C_42C;25C_control
5.99487	7.19656	-6.73481	-7.19656	5.12432	4.10742		+	Cluster 407		10	53	31.099	0	125.43	768460000	123	7.56497	0.0112701	AFT92579.1	hypothetical protein FTS_0699 [Francisella tularensis subsp. holarctica FSC200]	FTS_0699			Function unknown	S							BAX protein		Unknown		oxidative_lowpH;control_lowpH;agar_lowpH;25C_lowpH;oxidative_42C;control_42C;agar_42C;25C_42C;25C_oxidative
5.89568	8.07638	-6.71567	-8.07638	6.1316	6.08958		+	Cluster 407		8	61.5	13.036	0	221.68	2351500000	130	7.98627	0	AFT92239.1	50S ribosomal protein L18 [Francisella tularensis subsp. holarctica FSC200]	FTS_0249	rplR		Translation, ribosomal structure and biogenesis	J	COG0256	RplR	Ribosomal protein L18	Ribosome	RP-L18, large subunit ribosomal protein L18	K02881	This is one of the proteins that binds and probably mediates the attachment of the 5S RNA into the large ribosomal subunit, where it forms part of the central protuberance (By similarity)	GO:0003674;GO:0003735;GO:0005198;GO:0006412;GO:0008150;GO:0008152;GO:0009058;GO:0009059;GO:0009987;GO:0010467;GO:0019538;GO:0034645;GO:0040007;GO:0043170;GO:0044237;GO:0044238;GO:0044249;GO:0044260;GO:0044267;GO:0071704;GO:1901576	Cytoplasmic		oxidative_lowpH;control_lowpH;25C_lowpH;agar_lowpH;oxidative_42C;control_42C;25C_42C;agar_42C;agar_oxidative;agar_control
6.01731	7.91051	-6.25287	-7.91051	5.54991	5.41876		+	Cluster 407		51	66.1	83.333	0	323.31	44743000000	1598	7.65062	0.00330435	AFT92485.1	acyl-CoA dehydrogenase [Francisella tularensis subsp. holarctica FSC200]	FTS_0584	fadE		Lipid transport and metabolism	I	COG1960	CaiA	Acyl-CoA dehydrogenase related to the alkylation response protein AidB		fadE, acyl-CoA dehydrogenase [EC:1.3.99.-]		acyl-CoA dehydrogenase	GO:0003674;GO:0003824;GO:0008150;GO:0008152;GO:0016491;GO:0044710;GO:0055114	Unknown		oxidative_42C;control_42C;25C_42C;agar_42C;oxidative_lowpH;control_lowpH;25C_lowpH;agar_lowpH;25C_oxidative;agar_oxidative;25C_control;agar_control
5.83118	7.90751	-6.08185	-7.90751	6.36088	5.50524		+	Cluster 407		20	41.5	63.814	0	160.79	1364000000	201	7.70322	0.00162069	AFT92347.1	2-octaprenylphenol hydroxylase [Francisella tularensis subsp. holarctica FSC200]	FTS_0398	ubiB		Coenzyme transport and metabolism;Signal transduction mechanisms	H;T	COG0661	AarF	Predicted unusual protein kinase regulating ubiquinone biosynthesis, AarF/ABC1/UbiB family		ubiB, ubiquinone biosynthesis protein	K03688	Required, probably indirectly, for the hydroxylation of 2-octaprenylphenol to 2-octaprenyl-6-hydroxy-phenol, the fourth step in ubiquinone biosynthesis (By similarity)	GO:0003674;GO:0003824;GO:0005575;GO:0005623;GO:0005886;GO:0006732;GO:0006733;GO:0006743;GO:0006744;GO:0008150;GO:0008152;GO:0009058;GO:0009108;GO:0009987;GO:0016020;GO:0016491;GO:0019168;GO:0042180;GO:0042181;GO:0042375;GO:0044237;GO:0044249;GO:0044281;GO:0044283;GO:0044464;GO:0044710;GO:0044711;GO:0045426;GO:0051186;GO:0051188;GO:0055114;GO:0071704;GO:0071944;GO:1901576;GO:1901661;GO:1901663	CytoplasmicMembrane		oxidative_42C;control_42C;agar_42C;25C_42C;oxidative_lowpH;control_lowpH;agar_lowpH;25C_lowpH;25C_oxidative;25C_control;25C_agar
6.41304	7.49664	-5.89482	-7.49664	5.98735	5.35583		+	Cluster 407		18	43.6	49.86	0	252.19	2162100000	188	7.55796	0.00310828	AFT92462.1	3-deoxy-D-manno-octulosonic-acid transferase [Francisella tularensis subsp. holarctica FSC200]	FTS_0549	kdtA		Cell wall/membrane/envelope biogenesis	M	COG1519	KdtA	3-deoxy-D-manno-octulosonic-acid transferase	Lipopolysaccharide biosynthesis;Metabolic pathways	kdtA, 3-deoxy-D-manno-octulosonic-acid transferase [EC:2.4.99.12 2.4.99.13 2.4.99.14 2.4.99.15]	K02527	3-Deoxy-D-manno-octulosonic-acid transferase	GO:0000271;GO:0003674;GO:0003824;GO:0005575;GO:0005618;GO:0005623;GO:0005886;GO:0005975;GO:0005976;GO:0006629;GO:0006643;GO:0006644;GO:0006664;GO:0006793;GO:0006796;GO:0008150;GO:0008152;GO:0008610;GO:0008653;GO:0008654;GO:0009058;GO:0009059;GO:0009103;GO:0009244;GO:0009245;GO:0009247;GO:0009274;GO:0009276;GO:0009311;GO:0009312;GO:0009987;GO:0016020;GO:0016051;GO:0016740;GO:0019637;GO:0030312;GO:…	Cytoplasmic		oxidative_42C;agar_42C;control_42C;25C_42C;oxidative_lowpH;agar_lowpH;control_lowpH;25C_lowpH;25C_oxidative;25C_agar;25C_control
5.60426	7.5307	-6.56096	-7.5307	6.08438	5.13779		+	Cluster 407		30	53.5	66.676	0	323.31	13290000000	679	7.65593	0.00329268	AFT93276.1	lipid exporter (LipidE) family protein [Francisella tularensis subsp. holarctica FSC200]	FTS_1627	msbA		Defense mechanisms	V	COG1132	MdlB	ABC-type multidrug transport system, ATPase and permease component	ABC transporters	msbA, ATP-binding cassette, subfamily B, bacterial MsbA [EC:3.6.3.-]	K11085	Involved in lipid A export and possibly also in glycerophospholipid export and for biogenesis of the outer membrane. Transmembrane domains (TMD) form a pore in the inner membrane and the ATP-binding domain (NBD) is responsible for energy generation (By similarity)	GO:0000166;GO:0001882;GO:0001883;GO:0003674;GO:0003824;GO:0005215;GO:0005319;GO:0005488;GO:0005524;GO:0005575;GO:0005623;GO:0005886;GO:0006139;GO:0006152;GO:0006163;GO:0006195;GO:0006200;GO:0006725;GO:0006753;GO:0006793;GO:0006796;GO:0006807;GO:0006810;GO:0006869;GO:0008144;GO:0008150;GO:0008152;GO:0008289;GO:0009056;GO:0009116;GO:0009117;GO:0009119;GO:0009123;GO:0009125;GO:0009126;GO:0009128;GO:…	CytoplasmicMembrane		42C_lowpH;control_lowpH;oxidative_lowpH;agar_lowpH;25C_lowpH;control_42C;oxidative_42C;agar_42C;25C_42C;25C_control;25C_oxidative;25C_agar
6.096	7.22485	-6.48393	-7.22485	6.29633	5.38769		+	Cluster 407		13	34.4	35.582	0	107.32	2975100000	195	7.76346	0.00935	AFT92518.1	glycosyl transferase [Francisella tularensis subsp. holarctica FSC200]	FTS_0624	gtrB		Cell wall/membrane/envelope biogenesis	M	COG0463	WcaA	Glycosyltransferase involved in cell wall bisynthesis		gtrB, polyisoprenyl-phosphate glycosyltransferase [EC:2.4.-.-]	K20534	Catalyzes the transfer of 4-deoxy-4-formamido-L- arabinose from UDP to undecaprenyl phosphate. The modified arabinose is attached to lipid A and is required for resistance to polymyxin and cationic antimicrobial peptides (By similarity)	GO:0005575;GO:0005623;GO:0005886;GO:0016020;GO:0044464;GO:0071944	CytoplasmicMembrane		control_lowpH;agar_lowpH;oxidative_lowpH;25C_lowpH;control_42C;agar_42C;oxidative_42C;25C_42C;25C_control;25C_agar;25C_oxidative
6.75608	6.97113	-6.31876	-6.97113	5.57006	5.65394		+	Cluster 407		14	53.4	23.237	0	174.3	2105800000	171	7.78563	0.00138182	AFT92247.1	30S ribosomal protein S4 [Francisella tularensis subsp. holarctica FSC200]	FTS_0257	rpsD		Translation, ribosomal structure and biogenesis	J	COG0522	RpsD	Ribosomal protein S4 or related protein	Ribosome	RP-S4, small subunit ribosomal protein S4	K02986	One of the primary rRNA binding proteins, it binds directly to 16S rRNA where it nucleates assembly of the body of the 30S subunit (By similarity)	GO:0000900;GO:0003674;GO:0003676;GO:0003723;GO:0003729;GO:0003735;GO:0005198;GO:0005488;GO:0005575;GO:0005618;GO:0005622;GO:0005623;GO:0005737;GO:0005829;GO:0005886;GO:0006355;GO:0006412;GO:0006417;GO:0006446;GO:0008150;GO:0008152;GO:0009058;GO:0009059;GO:0009889;GO:0009890;GO:0009892;GO:0009987;GO:0010467;GO:0010468;GO:0010556;GO:0010558;GO:0010605;GO:0010608;GO:0016020;GO:0017148;GO:0019219;GO:…	Cytoplasmic		control_lowpH;oxidative_lowpH;agar_lowpH;25C_lowpH;control_42C;oxidative_42C;agar_42C;25C_42C;25C_control;25C_oxidative;25C_agar
7.35616	6.31347	-7.16615	-7.35616	5.09018	5.44983		+	Cluster 407		6	48.2	15.71	0	43.25	1119100000	72	7.9751	0	AFT92230.1	50S ribosomal protein L16 [Francisella tularensis subsp. holarctica FSC200]	FTS_0240	rplP		Translation, ribosomal structure and biogenesis	J	COG0197	RplP	Ribosomal protein L16/L10AE	Ribosome	RP-L16, large subunit ribosomal protein L16	K02878	Binds 23S rRNA and is also seen to make contacts with the A and possibly P site tRNAs (By similarity)	GO:0003674;GO:0003735;GO:0005198;GO:0005575;GO:0005623;GO:0005886;GO:0006412;GO:0008150;GO:0008152;GO:0009058;GO:0009059;GO:0009987;GO:0010467;GO:0016020;GO:0019538;GO:0034645;GO:0040007;GO:0043170;GO:0044237;GO:0044238;GO:0044249;GO:0044260;GO:0044267;GO:0044464;GO:0071704;GO:0071944;GO:1901576	Cytoplasmic		oxidative_lowpH;agar_lowpH;control_lowpH;25C_lowpH;agar_42C;control_42C;25C_42C
8.25518	7.9746	-8.25518	-7.8044	5.21056	5.61086		+	Cluster 407		7	71.1	9.4738	0	172.08	9494900000	229	8.97016	0	AFT92728.1	DNA-binding protein HU-beta [Francisella tularensis subsp. holarctica FSC200]	FTS_0886	hupB		Replication, recombination and repair	L	COG0776	HimA	Bacterial nucleoid DNA-binding protein		hupB, DNA-binding protein HU-beta	K03530	DNA-binding protein	GO:0003674;GO:0003676;GO:0003677;GO:0005488;GO:0005575;GO:0005622;GO:0005623;GO:0005694;GO:0006139;GO:0006259;GO:0006323;GO:0006351;GO:0006725;GO:0006807;GO:0006950;GO:0006974;GO:0008150;GO:0008152;GO:0009058;GO:0009059;GO:0009987;GO:0010467;GO:0016020;GO:0016043;GO:0016070;GO:0018130;GO:0019438;GO:0032774;GO:0033554;GO:0034641;GO:0034645;GO:0034654;GO:0043170;GO:0043226;GO:0043228;GO:0043229;GO:…	Cytoplasmic		oxidative_lowpH;25C_lowpH;agar_lowpH;control_lowpH;agar_42C;control_42C;control_oxidative
6.93441	8.13677	-8.13677	-7.97449	5.64256	6.34639		+	Cluster 407		10	68.6	13.378	0	110.11	1361600000	122	8.76541	0.000648649	AFT92245.1	30S ribosomal protein S13 [Francisella tularensis subsp. holarctica FSC200]	FTS_0255	rpsM		Translation, ribosomal structure and biogenesis	J	COG0099	RpsM	Ribosomal protein S13	Ribosome	RP-S13, small subunit ribosomal protein S13	K02952	Located at the top of the head of the 30S subunit, it contacts several helices of the 16S rRNA. In the 70S ribosome it contacts the 23S rRNA (bridge B1a) and protein L5 of the 50S subunit (bridge B1b), connecting the 2 subunits	GO:0003674;GO:0003735;GO:0005198;GO:0005575;GO:0005622;GO:0005623;GO:0005737;GO:0005829;GO:0005840;GO:0005886;GO:0006412;GO:0008150;GO:0008152;GO:0009058;GO:0009059;GO:0009987;GO:0010467;GO:0015935;GO:0016020;GO:0019538;GO:0022613;GO:0022626;GO:0022627;GO:0030529;GO:0032991;GO:0034645;GO:0042254;GO:0043170;GO:0043226;GO:0043228;GO:0043229;GO:0043232;GO:0044085;GO:0044237;GO:0044238;GO:0044249;GO:…	Cytoplasmic		oxidative_42C;agar_42C;25C_42C;control_42C;oxidative_lowpH;agar_lowpH;25C_lowpH;control_lowpH
6.20231	8.08934	-8.08934	-7.95557	5.5851	6.4792		+	Cluster 407		54	53.9	100.27	0	323.31	5411000000	511	8.62632	0	AFT92287.1	pyruvate dehydrogenase subunit E1 [Francisella tularensis subsp. holarctica FSC200]	FTS_0309	aceE		Energy production and conversion	C	COG2609	AceE	Pyruvate dehydrogenase complex, dehydrogenase (E1) component	Biosynthesis of antibiotics;Biosynthesis of secondary metabolites;Carbon metabolism;Citrate cycle (TCA cycle);Glycolysis / Gluconeogenesis;Metabolic pathways;Microbial metabolism in diverse environments;Pyruvate metabolism	aceE, pyruvate dehydrogenase E1 component [EC:1.2.4.1]	K00163	Component of the pyruvate dehydrogenase (PDH) complex, that catalyzes the overall conversion of pyruvate to acetyl-CoA and CO(2) (By similarity)	GO:0003674;GO:0003824;GO:0004738;GO:0004739;GO:0005575;GO:0005622;GO:0005623;GO:0005737;GO:0005829;GO:0006082;GO:0006084;GO:0006085;GO:0006086;GO:0006090;GO:0006637;GO:0006732;GO:0006793;GO:0008150;GO:0008152;GO:0009058;GO:0009108;GO:0009987;GO:0016020;GO:0016491;GO:0016624;GO:0016903;GO:0019752;GO:0032787;GO:0032991;GO:0035383;GO:0035384;GO:0043234;GO:0043436;GO:0044237;GO:0044249;GO:0044281;GO:…	Cytoplasmic		agar_42C;oxidative_42C;25C_42C;control_42C;25C_lowpH;control_lowpH
7.17139	8.63722	-7.28217	-8.63722	6.9308	6.6778		+	Cluster 407		24	68.7	37.84	0	323.31	12167000000	744	8.71634	0.00274286	AFT92899.1	putative glycerol-3-phosphate acyltransferase PlsX [Francisella tularensis subsp. holarctica FSC200]	FTS_1113	plsX		Lipid transport and metabolism	I	COG0416	PlsX	Fatty acid/phospholipid biosynthesis enzyme	Biosynthesis of secondary metabolites;Glycerolipid metabolism;Glycerophospholipid metabolism;Metabolic pathways	plsX, glycerol-3-phosphate acyltransferase PlsX [EC:2.3.1.15]	K03621	Catalyzes the reversible formation of acyl-phosphate (acyl-PO(4)) from acyl- acyl-carrier-protein (acyl-ACP). This enzyme utilizes acyl-ACP as fatty acyl donor, but not acyl-CoA (By similarity)	GO:0003674;GO:0003824;GO:0005575;GO:0005622;GO:0005623;GO:0005737;GO:0006629;GO:0006644;GO:0006793;GO:0006796;GO:0008150;GO:0008152;GO:0008610;GO:0008654;GO:0009058;GO:0009987;GO:0019637;GO:0044237;GO:0044238;GO:0044249;GO:0044255;GO:0044424;GO:0044464;GO:0044710;GO:0071704;GO:0090407;GO:1901576	Cytoplasmic		control_42C;oxidative_42C;25C_42C;agar_42C;oxidative_lowpH;25C_lowpH;agar_lowpH
6.43457	8.63854	-8.28417	-8.63854	6.74759	6.26098		+	Cluster 407		12	38	42.266	0	61.963	710400000	96	9.00012	0	AFT92498.1	hypothetical protein FTS_0598 [Francisella tularensis subsp. holarctica FSC200]	FTS_0598			Cell wall/membrane/envelope biogenesis	M	COG0438	RfaB	Glycosyltransferase involved in cell wall bisynthesis		wbtG, glycosyltransferase [EC:2.4.1.-]	K13003	Glycosyl transferase	GO:0000271;GO:0005975;GO:0005976;GO:0006629;GO:0008150;GO:0008152;GO:0008610;GO:0008653;GO:0009058;GO:0009059;GO:0009103;GO:0009987;GO:0016051;GO:0033692;GO:0034637;GO:0034645;GO:0043170;GO:0044237;GO:0044238;GO:0044249;GO:0044255;GO:0044260;GO:0044262;GO:0044264;GO:0044710;GO:0044723;GO:0071704;GO:1901135;GO:1901137;GO:1901576	Cytoplasmic		control_42C;oxidative_42C;agar_42C;25C_42C;oxidative_lowpH;agar_lowpH;25C_lowpH
6.41732	8.60534	-7.80619	-8.60534	6.29188	5.97735		+	Cluster 407		15	52.4	32.976	0	199.01	2919400000	197	8.64789	0	AFT92503.1	glycosyltransferase [Francisella tularensis subsp. holarctica FSC200]	FTS_0603	wbtK		Cell wall/membrane/envelope biogenesis	M							Glycosyl transferase		Cytoplasmic		control_lowpH;agar_lowpH;25C_lowpH;oxidative_lowpH;oxidative_42C
3.63956	4.01005	-2.30166	-4.01005	2.10444	3.942		+	Cluster 407		15	38.7	51.237	0	43.116	299150000	60	4.44229	0.0032	AFT92773.1	ATP-dependent protease ATP-binding subunit HslU [Francisella tularensis subsp. holarctica FSC200]	FTS_0944	hslU		Posttranslational modification, protein turnover, chaperones	O	COG1220	HslU	ATP-dependent protease HslVU (ClpYQ), ATPase subunit		hslU, ATP-dependent HslUV protease ATP-binding subunit HslU	K03667	this subunit has chaperone activity. The binding of ATP and its subsequent hydrolysis by HslU are essential for unfolding of protein substrates subsequently hydrolyzed by HslV. HslU recognizes the N-terminal part of its protein substrates and unfolds these before they are guided to HslV for hydrolysis (By similarity)	GO:0003674;GO:0003824;GO:0005575;GO:0005622;GO:0005623;GO:0005737;GO:0006508;GO:0006950;GO:0008150;GO:0008152;GO:0008233;GO:0009266;GO:0009408;GO:0009628;GO:0016020;GO:0016787;GO:0019538;GO:0043170;GO:0044238;GO:0044424;GO:0044464;GO:0050896;GO:0071704	Cytoplasmic		control_lowpH;agar_lowpH;oxidative_lowpH;25C_lowpH;agar_42C;oxidative_42C;25C_42C
3.76383	3.188	-2.20319	-3.96672	1.66633	3.96672		+	Cluster 407		19	56.1	44.64	0	271.58	1395100000	195	4.22378	0.00364497	AFT92915.1;AFT92127.1	hypothetical protein FTS_1132 [Francisella tularensis subsp. holarctica FSC200];hypothetical protein FTS_0104 [Francisella tularensis subsp. holarctica FSC200]	FTS_1132;FTS_0104			Function unknown;Function unknown	S							protein from Francisella novicida (262 aa), BLAST Score 443 bits (1140), Expect e-12 Identities 229 262 (87),Positives 235 262 (89);protein from Francisella novicida (262 aa), BLAST Score 443 bits (1140), Expect e-12 Identities 229 262 (87),Positives 235 262 (89)		Cytoplasmic		control_lowpH;agar_lowpH;oxidative_lowpH;25C_lowpH;agar_42C;oxidative_42C;25C_42C
2.71862	3.63558	-3.78424	-3.18412	2.51934	3.78424		+	Cluster 407		15	49.7	38.744	0	86.556	757990000	121	4.4472	0.0115668	AFT92139.1	hypothetical protein FTS_0129 [Francisella tularensis subsp. holarctica FSC200]	FTS_0129			Function unknown	S							lipopolysaccharide A protein		Unknown		agar_lowpH;25C_lowpH;control_lowpH;oxidative_lowpH;25C_42C;control_42C;oxidative_42C
2.33809	3.51216	-3.64725	-1.51245	2.84248	3.64725		+	Cluster 407		36	43	97.102	0	323.31	5113700000	417	3.77448	0.0033012	AFT92450.1	DNA gyrase, subunit A [Francisella tularensis subsp. holarctica FSC200]	FTS_0535	gyrA		Replication, recombination and repair	L	COG0188	GyrA	DNA gyrase/topoisomerase IV, subunit A		gyrA, DNA gyrase subunit A [EC:5.99.1.3]	K02469	DNA gyrase negatively supercoils closed circular double- stranded DNA in an ATP-dependent manner and also catalyzes the interconversion of other topological isomers of double-stranded DNA rings, including catenanes and knotted rings (By similarity)	GO:0000166;GO:0000287;GO:0001882;GO:0001883;GO:0003674;GO:0003824;GO:0003916;GO:0003918;GO:0005488;GO:0005524;GO:0005575;GO:0005618;GO:0005622;GO:0005623;GO:0005737;GO:0005886;GO:0006139;GO:0006152;GO:0006163;GO:0006195;GO:0006200;GO:0006259;GO:0006260;GO:0006261;GO:0006265;GO:0006351;GO:0006725;GO:0006753;GO:0006793;GO:0006796;GO:0006807;GO:0007059;GO:0008094;GO:0008150;GO:0008152;GO:0009056;GO:…	Cytoplasmic		42C_lowpH;control_lowpH;agar_lowpH;oxidative_lowpH;25C_lowpH;oxidative_42C;25C_42C
3.59516	3.06534	-3.59516	-2.73708	2.31195	1.34586		+	Cluster 407		8	9.6	50.845	0	49.233	1897000000	91	3.86611	0.0198247	AFT92702.1	major facilitator superfamily sugar transporter [Francisella tularensis subsp. holarctica FSC200]	FTS_0855			Carbohydrate transport and metabolism	G							Sugar (and other) transporter	GO:0005575;GO:0005623;GO:0005886;GO:0016020;GO:0044464;GO:0071944	CytoplasmicMembrane		control_lowpH;agar_lowpH;25C_lowpH;oxidative_lowpH;agar_42C;25C_42C;oxidative_42C;oxidative_control
3.52961	3.71006	-3.71006	-2.41654	3.41244	1.9104		+	Cluster 407		3	6.8	49.051	0	15.936	443240000	20	4.21902	0.0311111	AFT93293.1	proline:Na+ symporter [Francisella tularensis subsp. holarctica FSC200]	FTS_1655	putP		Amino acid transport and metabolism	E	COG0591	PutP	Na+/proline symporter		putP, sodium/proline symporter	K11928	Sodium proline symporter	GO:0003333;GO:0003674;GO:0005215;GO:0005283;GO:0005298;GO:0005342;GO:0005343;GO:0005416;GO:0005575;GO:0005623;GO:0005886;GO:0006810;GO:0006811;GO:0006812;GO:0006814;GO:0006820;GO:0006865;GO:0006869;GO:0008150;GO:0008324;GO:0008509;GO:0008514;GO:0009987;GO:0010876;GO:0015075;GO:0015077;GO:0015081;GO:0015171;GO:0015175;GO:0015179;GO:0015193;GO:0015291;GO:0015293;GO:0015294;GO:0015370;GO:0015672;GO:…	CytoplasmicMembrane		control_lowpH;agar_lowpH;25C_lowpH;oxidative_lowpH;control_42C;agar_42C;25C_42C;oxidative_42C;oxidative_control
2.4184	2.44132	-1.9027	-3.74574	3.74574	1.67934		+	Cluster 407		13	36.9	53.344	0	64.157	474760000	89	3.44236	0.0327064	AFT93223.1	peptidyl-prolyl cis-trans isomerase (PPIase) [Francisella tularensis subsp. holarctica FSC200]	FTS_1556	surA		Posttranslational modification, protein turnover, chaperones	O	COG0760	SurA	Parvulin-like peptidyl-prolyl isomerase		surA, peptidyl-prolyl cis-trans isomerase SurA [EC:5.2.1.8]	K03771	Chaperone involved in the correct folding and assembly of outer membrane proteins. Recognizes specific patterns of aromatic residues and the orientation of their side chains, which are found more frequently in integral outer membrane proteins. May act in both early periplasmic and late outer membrane-associated steps of protein maturation (By similarity)	GO:0000413;GO:0003674;GO:0003755;GO:0003824;GO:0005488;GO:0005515;GO:0005575;GO:0005623;GO:0005886;GO:0006457;GO:0006458;GO:0006464;GO:0008150;GO:0008152;GO:0009987;GO:0010468;GO:0010608;GO:0016020;GO:0016043;GO:0016044;GO:0016853;GO:0016859;GO:0018193;GO:0018208;GO:0019222;GO:0019538;GO:0022607;GO:0030288;GO:0030312;GO:0030313;GO:0031647;GO:0031975;GO:0033218;GO:0036211;GO:0042277;GO:0042592;GO:…	Periplasmic		agar_lowpH;25C_lowpH;oxidative_lowpH;control_lowpH;agar_42C;25C_42C;oxidative_42C;control_42C
3.1044	3.78965	-2.47794	-3.78965	3.36356	2.62121		+	Cluster 407		9	36.9	22.436	0	47.402	2033600000	128	4.12461	0.00544928	AFT92458.1	hypothetical protein FTS_0543 [Francisella tularensis subsp. holarctica FSC200]	FTS_0543													Unknown		control_lowpH;agar_lowpH;oxidative_lowpH;25C_lowpH;control_42C;agar_42C;oxidative_42C;25C_42C
2.81283	3.60829	-2.24257	-3.60829	3.33635	2.56171		+	Cluster 407		8	47	22.251	0	71.085	602270000	77	3.93927	0.0311778	AFT92650.1	Type IV pili glycosylation protein [Francisella tularensis subsp. holarctica FSC200]	FTS_0790	pilO		Cell motility;Extracellular structures	N;W	COG3167	PilO	Tfp pilus assembly protein PilO		pilO, type IV pilus assembly protein PilO	K02664			Unknown		control_42C;oxidative_42C;agar_42C;25C_42C;oxidative_lowpH;agar_lowpH;25C_lowpH;25C_control;25C_oxidative
3.67343	5.14115	-3.14877	-5.14115	4.19491	3.55961		+	Cluster 407		10	36.6	34.654	0	113.53	827550000	82	5.04544	0.0038232	AFT92305.1	group A colicin translocation tolA protein [Francisella tularensis subsp. holarctica FSC200]	FTS_0331	tolA		Cell wall/membrane/envelope biogenesis	M	COG3064	TolA	Membrane protein involved in colicin uptake		tolA, colicin import membrane protein	K03646			Cytoplasmic		control_lowpH;agar_lowpH;oxidative_lowpH;25C_lowpH;control_42C;agar_42C;oxidative_42C;25C_42C;25C_control
4.32962	4.53913	-3.2586	-4.7906	4.7906	2.68321		+	Cluster 407		23	66.8	40.193	0	252.68	6637300000	481	5.25511	0.0264712	AFT92678.1	methionine uptake transporter (MUT) family protein [Francisella tularensis subsp. holarctica FSC200]	FTS_0828	metN		Amino acid transport and metabolism	E	COG1135	AbcC	ABC-type methionine transport system, ATPase component	ABC transporters	metN, D-methionine transport system ATP-binding protein	K02071	Part of the ABC transporter complex MetNIQ involved in methionine import. Responsible for energy coupling to the transport system (By similarity)	GO:0000099;GO:0000101;GO:0000166;GO:0001882;GO:0001883;GO:0003333;GO:0003674;GO:0003824;GO:0005215;GO:0005342;GO:0005488;GO:0005524;GO:0005575;GO:0005623;GO:0005886;GO:0006139;GO:0006152;GO:0006163;GO:0006195;GO:0006200;GO:0006725;GO:0006753;GO:0006793;GO:0006796;GO:0006807;GO:0006810;GO:0006811;GO:0006812;GO:0006820;GO:0006865;GO:0008150;GO:0008152;GO:0008324;GO:0008509;GO:0008514;GO:0009056;GO:…	CytoplasmicMembrane		control_42C;agar_42C;oxidative_42C;25C_42C;control_lowpH;agar_lowpH;oxidative_lowpH;25C_lowpH
3.82793	4.15575	-4.39514	-5.47169	5.47169	3.48541		+	Cluster 407		6	18.2	34.318	0	16.794	251060000	22	5.54679	0.0173034	AFT93458.1	putative acyltransferase [Francisella tularensis subsp. holarctica FSC200]	FTS_1865	plsC		Lipid transport and metabolism	I							Acyltransferase	GO:0005575;GO:0005623;GO:0005886;GO:0016020;GO:0044464;GO:0071944	CytoplasmicMembrane		control_lowpH;agar_lowpH;oxidative_lowpH;25C_lowpH;agar_42C;oxidative_42C;25C_42C;oxidative_control;25C_control
3.41133	3.47094	-4.50281	-5.20413	3.52132	5.20413		+	Cluster 407		12	44.4	30.435	0	80.725	931070000	110	5.36003	0.00107527	AFT92914.1;AFT92126.1	hypothetical protein FTS_1131 [Francisella tularensis subsp. holarctica FSC200];hypothetical protein FTS_0103 [Francisella tularensis subsp. holarctica FSC200]	FTS_1131;FTS_0103													Unknown		control_lowpH;agar_lowpH;oxidative_lowpH;25C_lowpH;control_42C;agar_42C;oxidative_42C;25C_42C;25C_control
3.33082	4.59311	-3.98648	-4.59311	4.43594	3.13824		+	Cluster 407		9	18.8	69.339	0	76.476	665790000	61	5.29558	0.012446	AFT93431.1	amino acid transporter [Francisella tularensis subsp. holarctica FSC200]	FTS_1823			Amino acid transport and metabolism	E							Amino Acid	GO:0005575;GO:0005623;GO:0005886;GO:0016020;GO:0044464;GO:0071944	CytoplasmicMembrane		agar_lowpH;control_lowpH;oxidative_lowpH;25C_lowpH;agar_42C;control_42C;oxidative_42C;25C_42C
3.01844	4.84756	-4.84756	-3.87436	2.68046	2.15803		+	Cluster 407		5	10.9	66.3	0	5.296	306530000	9	4.68504	0.0161824	AFT93446.1	lysyl-tRNA synthetase [Francisella tularensis subsp. holarctica FSC200]	FTS_1853	lysU		Translation, ribosomal structure and biogenesis	J	COG1190	LysU	Lysyl-tRNA synthetase (class II)	Aminoacyl-tRNA biosynthesis	KARS, lysyl-tRNA synthetase, class II [EC:6.1.1.6]	K04567	lysyl-tRNA synthetase	GO:0000166;GO:0000287;GO:0001882;GO:0001883;GO:0003674;GO:0003824;GO:0004812;GO:0004824;GO:0005488;GO:0005524;GO:0005575;GO:0005622;GO:0005623;GO:0005737;GO:0005829;GO:0005886;GO:0006082;GO:0006139;GO:0006399;GO:0006412;GO:0006418;GO:0006430;GO:0006520;GO:0006725;GO:0006807;GO:0008150;GO:0008152;GO:0009058;GO:0009059;GO:0009987;GO:0010467;GO:0016020;GO:0016070;GO:0016874;GO:0016875;GO:0016876;GO:…	Cytoplasmic		control_42C;oxidative_42C;agar_42C;25C_42C;control_lowpH;oxidative_lowpH;agar_lowpH;25C_lowpH;agar_control;25C_control;agar_oxidative;25C_oxidative
2.92048	4.73209	-4.43546	-4.73209	3.59309	2.0396		+	Cluster 407		8	15.4	69.218	0	29.508	449750000	70	5.10208	0.0118993	AFT92149.1	monovalent cation:proton antiporter [Francisella tularensis subsp. holarctica FSC200]	FTS_0141			Inorganic ion transport and metabolism	P							Sodium/hydrogen exchanger family		CytoplasmicMembrane		control_42C;oxidative_42C;agar_42C;25C_42C;control_lowpH;oxidative_lowpH;agar_lowpH;25C_lowpH;25C_control
2.4117	4.04203	-4.04203	-3.87292	3.41793	1.84884		+	Cluster 407		6	13.2	48.024	0	19.68	570210000	50	4.62004	0.0091245	AFT93161.1	glycerol-3-phosphate transporter [Francisella tularensis subsp. holarctica FSC200]	FTS_1475	glpT		Carbohydrate transport and metabolism	G	COG2271	UhpC	Sugar phosphate permease		glpT, MFS transporter, OPA family, glycerol-3-phosphate transporter	K02445	transporter	GO:0003674;GO:0005215;GO:0005575;GO:0005623;GO:0005886;GO:0006810;GO:0006811;GO:0006817;GO:0006820;GO:0008150;GO:0008509;GO:0008643;GO:0009987;GO:0015075;GO:0015103;GO:0015114;GO:0015144;GO:0015166;GO:0015168;GO:0015169;GO:0015291;GO:0015297;GO:0015301;GO:0015315;GO:0015527;GO:0015665;GO:0015698;GO:0015711;GO:0015748;GO:0015791;GO:0015793;GO:0015794;GO:0015850;GO:0016020;GO:0022804;GO:0022857;GO:…	CytoplasmicMembrane		control_lowpH;oxidative_lowpH;agar_lowpH;25C_lowpH;control_42C;oxidative_42C;agar_42C;25C_42C;25C_control
2.62536	4.34262	-3.8885	-4.34262	4.06217	1.7624		+	Cluster 407		14	28.4	45.324	0	55.18	1350000000	182	4.9358	0.0162269	AFT92668.1	Type IV pili polytopic inner membrane protein [Francisella tularensis subsp. holarctica FSC200]	FTS_0817	pilC		Cell motility;Intracellular trafficking, secretion, and vesicular transport;Extracellular structures	N;U;W	COG1459	PulF	Type II secretory pathway, component PulF		pilC, type IV pilus assembly protein PilC	K02653	type IV pilin biogenesis protein	GO:0005575;GO:0005623;GO:0005886;GO:0006810;GO:0008104;GO:0008150;GO:0009297;GO:0009306;GO:0009987;GO:0015031;GO:0015628;GO:0016020;GO:0016043;GO:0022607;GO:0030030;GO:0030031;GO:0030255;GO:0032940;GO:0033036;GO:0043711;GO:0044085;GO:0044097;GO:0044464;GO:0044699;GO:0044763;GO:0044765;GO:0045184;GO:0046903;GO:0051179;GO:0051234;GO:0051641;GO:0051649;GO:0055085;GO:0071702;GO:0071806;GO:0071840;GO:…	CytoplasmicMembrane		control_lowpH;oxidative_lowpH;agar_lowpH;25C_lowpH;control_42C;oxidative_42C;agar_42C;25C_42C;25C_control
2.35373	3.98582	-3.93208	-3.98582	2.59498	1.58025		+	Cluster 407		9	31.8	34.484	0	154.18	3184400000	128	4.37943	0.0138146	AFT92687.1	preprotein translocase subunit SecF [Francisella tularensis subsp. holarctica FSC200]	FTS_0839	secF		Intracellular trafficking, secretion, and vesicular transport	U	COG0341	SecF	Preprotein translocase subunit SecF	Bacterial secretion system;Protein export	secF, preprotein translocase subunit SecF	K03074	Part of the Sec protein translocase complex. Interacts with the SecYEG preprotein conducting channel. SecDF uses the proton motive force (PMF) to complete protein translocation after the ATP-dependent function of SecA (By similarity)	GO:0005575;GO:0005623;GO:0005886;GO:0016020;GO:0044464;GO:0071944	CytoplasmicMembrane		control_lowpH;oxidative_lowpH;agar_lowpH;25C_lowpH;oxidative_42C;agar_42C;25C_42C;25C_control
2.91592	4.04556	-4.03834	-4.04556	3.50133	2.97486		+	Cluster 407		15	33.3	54.495	0	61.499	826790000	95	4.94812	0.00590566	AFT92753.1	RmuC family protein [Francisella tularensis subsp. holarctica FSC200]	FTS_0916	rmuC		Replication, recombination and repair	L	COG1322	RmuC	DNA anti-recombination protein (rearrangement mutator) RmuC		rmuC, DNA recombination protein RmuC	K09760	DNA recombination protein	GO:0006139;GO:0006259;GO:0006310;GO:0006725;GO:0006807;GO:0008150;GO:0008152;GO:0009987;GO:0034641;GO:0043170;GO:0044237;GO:0044238;GO:0044260;GO:0046483;GO:0071704;GO:0090304;GO:1901360	Cytoplasmic		control_lowpH;oxidative_lowpH;agar_lowpH;25C_lowpH;oxidative_42C;agar_42C;25C_42C;agar_control;25C_control
5.01091	5.24494	-5.24494	-4.54203	2.86311	2.43095		+	Cluster 407		4	35.8	18.171	0	13.404	321350000	40	5.76626	0.00579048	AFT93398.1	NADH dehydrogenase I, E subunit [Francisella tularensis subsp. holarctica FSC200]	FTS_1783	nuoE		Energy production and conversion	C	COG1905	NuoE	NADH:ubiquinone oxidoreductase 24 kD subunit (chain E)	Metabolic pathways;Oxidative phosphorylation	nuoE, NADH-quinone oxidoreductase subunit E [EC:1.6.5.3]	K00334	NADH dehydrogenase subunit E	GO:0003674;GO:0003824;GO:0003954;GO:0005575;GO:0005622;GO:0005623;GO:0005737;GO:0005739;GO:0005740;GO:0005743;GO:0005746;GO:0005747;GO:0005886;GO:0006091;GO:0006119;GO:0006120;GO:0006793;GO:0006796;GO:0008137;GO:0008150;GO:0008152;GO:0009987;GO:0015980;GO:0016020;GO:0016310;GO:0016491;GO:0016651;GO:0016655;GO:0019866;GO:0022900;GO:0022904;GO:0030964;GO:0031090;GO:0031966;GO:0031967;GO:0031975;GO:…	Cytoplasmic		control_42C;agar_42C;oxidative_42C;25C_42C;agar_lowpH;oxidative_lowpH;25C_lowpH;oxidative_control;25C_control
3.67028	5.18097	-5.18097	-4.25278	3.66519	2.94283		+	Cluster 407		6	40.6	15.095	0	35.951	464000000	58	5.2552	0.00232258	AFT92242.1	50S ribosomal protein L15 [Francisella tularensis subsp. holarctica FSC200]	FTS_0252	rplO		Translation, ribosomal structure and biogenesis	J	COG0200	RplO	Ribosomal protein L15	Ribosome	RP-L15, large subunit ribosomal protein L15	K02876	Binds to the 23S rRNA (By similarity)	GO:0003674;GO:0003735;GO:0005198;GO:0005575;GO:0005623;GO:0005886;GO:0006412;GO:0008150;GO:0008152;GO:0009058;GO:0009059;GO:0009987;GO:0010467;GO:0016020;GO:0019538;GO:0034645;GO:0043170;GO:0044237;GO:0044238;GO:0044249;GO:0044260;GO:0044267;GO:0044464;GO:0071704;GO:0071944;GO:1901576	Cytoplasmic		control_42C;oxidative_42C;agar_42C;25C_42C;oxidative_lowpH;agar_lowpH;25C_lowpH;agar_control;25C_control
3.84133	4.78672	-4.17787	-4.78672	3.47701	2.69912		+	Cluster 407		6	54.3	13.762	0	57.881	937740000	101	5.1653	0.0017	AFT92246.1	30S ribosomal protein S11 [Francisella tularensis subsp. holarctica FSC200]	FTS_0256	rpsK		Translation, ribosomal structure and biogenesis	J	COG0100	RpsK	Ribosomal protein S11	Ribosome	RP-S11, small subunit ribosomal protein S11	K02948	Located on the platform of the 30S subunit, it bridges several disparate RNA helices of the 16S rRNA. Forms part of the Shine-Dalgarno cleft in the 70S ribosome (By similarity)	GO:0003674;GO:0003735;GO:0005198;GO:0005575;GO:0005623;GO:0005886;GO:0006412;GO:0008150;GO:0008152;GO:0009058;GO:0009059;GO:0009987;GO:0010467;GO:0016020;GO:0019538;GO:0034645;GO:0040007;GO:0043170;GO:0044237;GO:0044238;GO:0044249;GO:0044260;GO:0044267;GO:0044464;GO:0071704;GO:0071944;GO:1901576	Cytoplasmic		control_42C;agar_42C;oxidative_42C;25C_42C;control_lowpH;agar_lowpH;oxidative_lowpH;25C_lowpH;25C_control
3.76986	4.88001	-4.46403	-4.88001	3.58293	2.66756		+	Cluster 407		16	40.6	42.813	0	140.79	2745900000	217	5.31705	0.0122695	AFT93053.1	Co/Zn/Cd cation transporter [Francisella tularensis subsp. holarctica FSC200]	FTS_1323			Inorganic ion transport and metabolism	P							cation diffusion facilitator family transporter		CytoplasmicMembrane		control_42C;oxidative_42C;agar_42C;25C_42C;agar_lowpH;25C_lowpH;agar_control;25C_control
4.08417	4.84956	-4.08792	-4.84956	3.90504	2.13322		+	Cluster 407		21	65.8	33.235	0	323.31	7438700000	367	5.30369	0.00972075	AFT93371.1	F0F1 ATP synthase subunit gamma [Francisella tularensis subsp. holarctica FSC200]	FTS_1752	atpG		Energy production and conversion	C	COG0224	AtpG	FoF1-type ATP synthase, gamma subunit	Metabolic pathways;Oxidative phosphorylation	ATPF1G, F-type H+transporting ATPase subunit gamma	K02115	Produces ATP from ADP in the presence of a proton gradient across the membrane. The gamma chain is believed to be important in regulating ATPase activity and the flow of protons through the CF(0) complex (By similarity)	GO:0003674;GO:0003824;GO:0005215;GO:0005575;GO:0005618;GO:0005622;GO:0005623;GO:0005737;GO:0005886;GO:0006139;GO:0006152;GO:0006163;GO:0006164;GO:0006195;GO:0006200;GO:0006725;GO:0006753;GO:0006754;GO:0006793;GO:0006796;GO:0006807;GO:0006810;GO:0006811;GO:0006812;GO:0006818;GO:0008150;GO:0008152;GO:0008324;GO:0009056;GO:0009058;GO:0009116;GO:0009117;GO:0009119;GO:0009123;GO:0009124;GO:0009125;GO:…	Cytoplasmic		42C_lowpH;agar_lowpH;oxidative_lowpH;25C_lowpH;control_lowpH;oxidative_42C;25C_42C;control_42C;25C_agar;control_agar
4.3969	4.98206	-4.07637	-4.98206	4.02492	2.25512		+	Cluster 407		7	38	30.674	0	21.598	589120000	87	5.44335	0.0163584	AFT93192.1	hypothetical protein FTS_1512 [Francisella tularensis subsp. holarctica FSC200]	FTS_1512													Unknown		42C_lowpH;agar_lowpH;oxidative_lowpH;25C_lowpH;control_lowpH;oxidative_42C;25C_42C;control_42C;control_agar
4.44154	5.02211	-5.02211	-3.85996	4.72633	2.61877		+	Cluster 407		13	46.8	33.263	0	252.81	11320000000	336	5.58824	0.022408	AFT92489.1	hypothetical protein FTS_0588 [Francisella tularensis subsp. holarctica FSC200]	FTS_0588													CytoplasmicMembrane		25C_lowpH;agar_lowpH;control_lowpH;oxidative_lowpH;25C_42C;agar_42C;control_42C;oxidative_42C;control_25C;oxidative_25C
4.46937	4.54747	-4.54747	-2.79494	4.06624	2.29546		+	Cluster 407		6	38.5	23.9	0	24.501	371470000	33	4.99611	0.004	AFT92844.1	hypothetical protein FTS_1037 [Francisella tularensis subsp. holarctica FSC200]	FTS_1037			Cell wall/membrane/envelope biogenesis	M	COG3117	YrbK	Lipopolysaccharide export system protein LptC		lptC, lipopolysaccharide export system protein LptC	K11719			Unknown		42C_lowpH;control_lowpH;oxidative_lowpH;25C_lowpH;agar_lowpH;25C_42C;agar_42C;25C_control;agar_control;agar_oxidative
3.83497	4.49197	-4.49197	-4.1645	4.33036	2.32766		+	Cluster 407		8	15.8	30.363	0	165.13	2822100000	223	5.4117	0.0196176	AFT92301.1	CDP-alcohol phosphatidyltransferase [Francisella tularensis subsp. holarctica FSC200]	FTS_0327	pssA		Lipid transport and metabolism	I	COG1183	PssA	Phosphatidylserine synthase	Biosynthesis of secondary metabolites;Glycerophospholipid metabolism;Glycine, serine and threonine metabolism;Metabolic pathways	CHO1, CDP-diacylglycerol---serine O-phosphatidyltransferase [EC:2.7.8.8]	K17103	CDP-diacylglycerol--serine O-phosphatidyltransferase	GO:0003674;GO:0003824;GO:0004349;GO:0005575;GO:0005623;GO:0005886;GO:0006629;GO:0006793;GO:0006796;GO:0008150;GO:0008152;GO:0009987;GO:0016020;GO:0016301;GO:0016310;GO:0016740;GO:0016772;GO:0016774;GO:0019202;GO:0044237;GO:0044238;GO:0044255;GO:0044464;GO:0044710;GO:0071704;GO:0071944	CytoplasmicMembrane		42C_lowpH;control_lowpH;oxidative_lowpH;agar_lowpH;25C_lowpH;oxidative_42C;agar_42C;25C_42C;agar_control;25C_control;agar_oxidative;25C_oxidative
4.59708	4.69759	-4.69759	-2.89775	3.22005	2.23454		+	Cluster 407		3	12	23.508	0	11.26	459760000	44	4.93352	0.0198046	AFT92599.1	DedA family protein [Francisella tularensis subsp. holarctica FSC200]	FTS_0722	dedA2		Function unknown	S	COG0586	DedA	Uncharacterized membrane protein DedA, SNARE-associated domain		dedA, membrane-associated protein	K03975	inner membrane protein yabI	GO:0000003;GO:0000910;GO:0005575;GO:0005623;GO:0005886;GO:0007049;GO:0008150;GO:0009987;GO:0016020;GO:0019954;GO:0022402;GO:0032505;GO:0043093;GO:0044464;GO:0044699;GO:0044763;GO:0051301;GO:0071944	CytoplasmicMembrane		42C_lowpH;control_lowpH;oxidative_lowpH;agar_lowpH;25C_lowpH;agar_42C;25C_42C;25C_control;25C_oxidative;25C_agar
4.59688	7.00515	-4.5994	-7.03989	5.84241	7.03989		+	Cluster 407		17	62.8	24.877	0	214.76	5387500000	322	7.3094	0.00107865	AFT92229.1	30S ribosomal protein S3 [Francisella tularensis subsp. holarctica FSC200]	FTS_0239	rpsC		Translation, ribosomal structure and biogenesis	J	COG0092	RpsC	Ribosomal protein S3	Ribosome	RP-S3, small subunit ribosomal protein S3	K02982	Binds the lower part of the 30S subunit head. Binds mRNA in the 70S ribosome, positioning it for translation (By similarity)	GO:0003674;GO:0003735;GO:0005198;GO:0005575;GO:0005618;GO:0005622;GO:0005623;GO:0005737;GO:0005829;GO:0005840;GO:0005886;GO:0006412;GO:0008150;GO:0008152;GO:0009058;GO:0009059;GO:0009987;GO:0010467;GO:0015935;GO:0016020;GO:0019538;GO:0022626;GO:0022627;GO:0030312;GO:0030529;GO:0032991;GO:0034645;GO:0040007;GO:0043170;GO:0043226;GO:0043228;GO:0043229;GO:0043232;GO:0044237;GO:0044238;GO:0044249;GO:…	Cytoplasmic		42C_lowpH;agar_lowpH;control_lowpH;oxidative_lowpH;25C_lowpH;agar_42C;control_42C;oxidative_42C;25C_42C;25C_agar;25C_control
4.59196	5.85727	-3.82578	-6.94274	5.82715	6.94274		+	Cluster 407		7	31.7	28.868	0	51.23	827630000	70	6.72615	0	AFT92889.1	inositol monophosphatase family protein [Francisella tularensis subsp. holarctica FSC200]	FTS_1103	suhB		Carbohydrate transport and metabolism	G	COG0483	SuhB	Archaeal fructose-1,6-bisphosphatase or related enzyme of inositol monophosphatase family	Inositol phosphate metabolism;Metabolic pathways;Streptomycin biosynthesis	E3.1.3.25, myo-inositol-1(or 4)-monophosphatase [EC:3.1.3.25]	K01092	inositol monophosphatase	GO:0000287;GO:0003674;GO:0003824;GO:0005488;GO:0005575;GO:0005622;GO:0005623;GO:0005737;GO:0005975;GO:0006066;GO:0006793;GO:0006796;GO:0007154;GO:0007165;GO:0008150;GO:0008152;GO:0008934;GO:0009056;GO:0009987;GO:0016311;GO:0016787;GO:0016788;GO:0016791;GO:0019637;GO:0019751;GO:0023052;GO:0031403;GO:0031420;GO:0042578;GO:0043167;GO:0043169;GO:0043647;GO:0044237;GO:0044238;GO:0044262;GO:0044281;GO:…	Cytoplasmic		42C_lowpH;control_lowpH;agar_lowpH;oxidative_lowpH;25C_lowpH;control_42C;agar_42C;oxidative_42C;25C_42C;25C_control;25C_agar
6.42229	5.5453	-3.62977	-6.42229	3.93403	3.72551		+	Cluster 407		13	55.1	24.59	0	295.89	3976900000	282	6.14182	0.00925714	AFT92916.1;AFT92128.1	hypothetical protein FTS_1133 [Francisella tularensis subsp. holarctica FSC200];hypothetical protein FTS_0105 [Francisella tularensis subsp. holarctica FSC200]	FTS_1133;FTS_0105													Cytoplasmic		42C_lowpH;control_lowpH;oxidative_lowpH;agar_lowpH;25C_lowpH;oxidative_42C;agar_42C;25C_42C;25C_control
5.28114	6.83851	-4.50224	-6.83851	4.6469	4.29157		+	Cluster 407		6	13.8	56.324	0	24.34	690030000	68	6.45044	0.00228571	AFT92983.1	proton-dependent oligopeptide transporter (POT) family protein, di- or tripeptide:H+ symporter [Francisella tularensis subsp. holarctica FSC200]	FTS_1225			Amino acid transport and metabolism	E	COG3104	PTR2	Dipeptide/tripeptide permease		TC.POT, proton-dependent oligopeptide transporter, POT family	K03305	Proton-dependent permease that transports di- and tripeptides (By similarity)	GO:0003674;GO:0005215;GO:0005427;GO:0005575;GO:0005623;GO:0005886;GO:0006810;GO:0006811;GO:0006812;GO:0006818;GO:0006857;GO:0008150;GO:0008324;GO:0009987;GO:0015075;GO:0015197;GO:0015198;GO:0015291;GO:0015293;GO:0015294;GO:0015295;GO:0015322;GO:0015333;GO:0015672;GO:0015833;GO:0015992;GO:0016020;GO:0016021;GO:0022804;GO:0022857;GO:0022891;GO:0022892;GO:0022897;GO:0031224;GO:0034220;GO:0035672;GO:…	CytoplasmicMembrane		42C_lowpH;control_lowpH;agar_lowpH;oxidative_lowpH;25C_lowpH;control_42C;agar_42C;oxidative_42C;25C_42C;25C_control
4.94218	6.61595	-4.12795	-6.61595	5.5381	5.12598		+	Cluster 407		7	65.1	15.901	0	68.974	1319400000	128	6.45181	0.00324324	AFT92304.1	TolR protein [Francisella tularensis subsp. holarctica FSC200]	FTS_0330	tolR		Intracellular trafficking, secretion, and vesicular transport	U	COG0848	ExbD	Biopolymer transport protein ExbD		tolR, biopolymer transport protein TolR	K03560	Tolr protein	GO:0003674;GO:0005215;GO:0005575;GO:0005623;GO:0005886;GO:0006810;GO:0008150;GO:0016020;GO:0044464;GO:0051179;GO:0051234;GO:0071944	CytoplasmicMembrane		42C_lowpH;control_lowpH;oxidative_lowpH;agar_lowpH;25C_lowpH;control_42C;oxidative_42C;agar_42C;25C_42C;25C_control
5.16081	6.73603	-4.68853	-6.73603	5.65889	4.56638		+	Cluster 407		5	9.9	45.941	0	18.31	136240000	37	6.62511	0.00639252	AFT93471.1	tRNA processing ribonuclease BN [Francisella tularensis subsp. holarctica FSC200]	FTS_1887	rbn		Function unknown	S	COG1295	BrkB	Uncharacterized membrane protein, BrkB/YihY/UPF0761 family (not an RNase)		membrane protein	K07058	UPF0761 membrane protein	GO:0005575;GO:0005623;GO:0005886;GO:0016020;GO:0044464;GO:0071944	CytoplasmicMembrane		42C_lowpH;agar_lowpH;control_lowpH;oxidative_lowpH;25C_lowpH;agar_42C;control_42C;oxidative_42C;25C_42C
6.11251	7.02113	-4.40669	-7.02113	5.88962	4.88316		+	Cluster 407		13	52.4	27.857	0	102.76	1299500000	133	6.93083	0.00384358	AFT92105.1	acyltransferase [Francisella tularensis subsp. holarctica FSC200]	FTS_0078			Lipid transport and metabolism	I	COG0204	PlsC	1-acyl-sn-glycerol-3-phosphate acyltransferase	Biosynthesis of secondary metabolites;Glycerolipid metabolism;Glycerophospholipid metabolism;Metabolic pathways	plsC, 1-acyl-sn-glycerol-3-phosphate acyltransferase [EC:2.3.1.51]	K00655	Phospholipid glycerol acyltransferase	GO:0005575;GO:0005623;GO:0005886;GO:0006629;GO:0008150;GO:0008152;GO:0009372;GO:0009987;GO:0016020;GO:0042592;GO:0044237;GO:0044238;GO:0044255;GO:0044464;GO:0044710;GO:0044764;GO:0048872;GO:0048874;GO:0051704;GO:0065007;GO:0065008;GO:0071704;GO:0071944	CytoplasmicMembrane		42C_lowpH;control_lowpH;oxidative_lowpH;agar_lowpH;25C_lowpH;control_42C;oxidative_42C;agar_42C;25C_42C;25C_control;25C_oxidative
5.84911	6.97619	-5.39095	-6.97619	5.95692	4.9635		+	Cluster 407		13	55.1	30.8	0	133.29	1674100000	175	7.12769	0.00312821	AFT93013.1	short chain dehydrogenase [Francisella tularensis subsp. holarctica FSC200]	FTS_1268			Function unknown	S							Short chain dehydrogenase	GO:0003674;GO:0003824;GO:0008150;GO:0008152;GO:0016491;GO:0044710;GO:0055114	Cytoplasmic		oxidative_lowpH;control_lowpH;agar_lowpH;25C_lowpH;oxidative_42C;control_42C;agar_42C;25C_42C;25C_oxidative;25C_control;25C_agar
5.96167	7.01533	-5.0398	-7.01533	5.85961	5.2713		+	Cluster 407		20	68.9	40.669	0	235.43	2212300000	277	7.05496	0.00224615	AFT92589.1	glycosyl transferase, group 1 [Francisella tularensis subsp. holarctica FSC200]	FTS_0710	lpcC		Cell wall/membrane/envelope biogenesis	M							lipopolysaccharide core biosynthesis mannosyltransferase	GO:0000030;GO:0000271;GO:0003674;GO:0003824;GO:0005975;GO:0005976;GO:0006629;GO:0008150;GO:0008152;GO:0008610;GO:0008653;GO:0009058;GO:0009059;GO:0009103;GO:0009244;GO:0009311;GO:0009312;GO:0009987;GO:0016051;GO:0016740;GO:0016757;GO:0016758;GO:0033692;GO:0034637;GO:0034645;GO:0043170;GO:0044237;GO:0044238;GO:0044249;GO:0044255;GO:0044260;GO:0044262;GO:0044264;GO:0044710;GO:0044723;GO:0046401;GO:…	Cytoplasmic		control_lowpH;agar_lowpH;oxidative_lowpH;25C_lowpH;agar_42C;oxidative_42C;25C_42C;25C_control;25C_agar;25C_oxidative
5.53877	6.77029	-4.84475	-6.77029	5.83031	5.60727		+	Cluster 407		15	49.5	34.827	0	80.609	710970000	105	6.91083	0.00106667	AFT92516.1	ABC transporter ATP-binding protein [Francisella tularensis subsp. holarctica FSC200]	FTS_0622	yagD		Defense mechanisms;Carbohydrate transport and metabolism;Cell wall/membrane/envelope biogenesis	G;M;V	COG1131;COG1134	CcmA;TagH	ABC-type multidrug transport system, ATPase component, ABC-type polysaccharide/polyol phosphate transport system, ATPase component		ABC-2.A, ABC-2 type transport system ATP-binding protein	K01990	(ABC) transporter	GO:0003674;GO:0003824;GO:0005215;GO:0006139;GO:0006152;GO:0006163;GO:0006195;GO:0006200;GO:0006725;GO:0006753;GO:0006793;GO:0006796;GO:0006807;GO:0006810;GO:0008150;GO:0008152;GO:0009056;GO:0009116;GO:0009117;GO:0009119;GO:0009123;GO:0009125;GO:0009126;GO:0009128;GO:0009141;GO:0009143;GO:0009144;GO:0009146;GO:0009150;GO:0009154;GO:0009158;GO:0009161;GO:0009164;GO:0009166;GO:0009167;GO:0009169;GO:…	CytoplasmicMembrane		control_lowpH;agar_lowpH;oxidative_lowpH;25C_lowpH;control_42C;agar_42C;oxidative_42C;25C_42C;25C_control;25C_agar
5.72857	6.97272	-5.20824	-6.97272	5.5376	4.43129		+	Cluster 407		4	18	33.755	0	63.738	274110000	49	6.9185	0.00331288	AFT92332.1	cation transporter [Francisella tularensis subsp. holarctica FSC200]	FTS_0377			Inorganic ion transport and metabolism	P							Cation efflux system component		CytoplasmicMembrane		42C_lowpH;control_lowpH;agar_lowpH;oxidative_lowpH;25C_lowpH;oxidative_42C;25C_42C;25C_control;25C_agar;25C_oxidative
5.12567	6.60916	-5.93797	-6.60916	5.04866	5.06588		+	Cluster 407		19	54.2	43.087	0	157.95	2169500000	226	6.98389	0	AFT92457.1	lipid-A-disaccharide synthase [Francisella tularensis subsp. holarctica FSC200]	FTS_0542	lpxB		Cell wall/membrane/envelope biogenesis	M	COG0763	LpxB	Lipid A disaccharide synthetase	Lipopolysaccharide biosynthesis;Metabolic pathways	lpxB, lipid-A-disaccharide synthase [EC:2.4.1.182]	K00748	Condensation of UDP-2,3-diacylglucosamine and 2,3- diacylglucosamine-1-phosphate to form lipid A disaccharide, a precursor of lipid A, a phosphorylated glycolipid that anchors the lipopolysaccharide to the outer membrane of the cell (By similarity)	GO:0003674;GO:0003824;GO:0005488;GO:0005543;GO:0005575;GO:0005623;GO:0005886;GO:0005975;GO:0006629;GO:0006643;GO:0006644;GO:0006664;GO:0006793;GO:0006796;GO:0008150;GO:0008152;GO:0008194;GO:0008289;GO:0008610;GO:0008654;GO:0008915;GO:0009058;GO:0009245;GO:0009247;GO:0009311;GO:0009312;GO:0009987;GO:0016020;GO:0016051;GO:0016740;GO:0016757;GO:0016758;GO:0019637;GO:0019897;GO:0019898;GO:0043167;GO:…	Cytoplasmic		control_lowpH;oxidative_lowpH;agar_lowpH;25C_lowpH;control_42C;oxidative_42C;agar_42C;25C_42C;25C_control
3.60389	5.77184	-4.63942	-5.77184	3.6894	2.9461		+	Cluster 407		31	50.4	78.581	0	255.96	3212600000	309	5.56776	0.0124366	AFT93187.1	AMP-binding protein [Francisella tularensis subsp. holarctica FSC200]	FTS_1506			Lipid transport and metabolism	I							Plays a role in lysophospholipid acylation. Transfers fatty acids to the 1-position via an enzyme-bound acyl-ACP intermediate in the presence of ATP and magnesium. Its physiological function is to regenerate phosphatidylethanolamine from 2-acyl-glycero-3-phosphoethanolamine (2-acyl-GPE) formed by transacylation reactions or degradation by phospholipase A1 (By similarity)	GO:0003674;GO:0003824;GO:0005575;GO:0005623;GO:0005886;GO:0006082;GO:0006629;GO:0006631;GO:0006644;GO:0006650;GO:0006654;GO:0006793;GO:0006796;GO:0008150;GO:0008152;GO:0008374;GO:0008610;GO:0008654;GO:0008779;GO:0008922;GO:0009058;GO:0009987;GO:0015645;GO:0016020;GO:0016021;GO:0016740;GO:0016746;GO:0016747;GO:0016874;GO:0016877;GO:0016878;GO:0019637;GO:0019752;GO:0031224;GO:0032787;GO:0043436;GO:…	CytoplasmicMembrane		control_42C;oxidative_42C;agar_42C;25C_42C;control_lowpH;oxidative_lowpH;agar_lowpH;25C_lowpH
3.1144	5.31654	-4.75453	-5.31654	3.93138	2.59911		+	Cluster 407		4	8.1	43.509	0	16.694	325480000	35	5.47687	0.00754751	AFT93287.1	drug:H+ antiporter-1 (DHA1) family protein [Francisella tularensis subsp. holarctica FSC200]	FTS_1643			Carbohydrate transport and metabolism;Amino acid transport and metabolism;Inorganic ion transport and metabolism;General function prediction only	E;G;P;R	COG0477	ProP	MFS family permease		bcr, tcaB, MFS transporter, DHA1 family, multidrug resistance protein	K07552	Multidrug resistance protein MdtL	GO:0005575;GO:0005623;GO:0005886;GO:0016020;GO:0044464;GO:0071944	CytoplasmicMembrane		control_lowpH;oxidative_lowpH;25C_lowpH;agar_lowpH;control_42C;oxidative_42C;25C_42C;agar_42C;25C_control;agar_control
3.45261	6.24668	-4.49716	-6.24668	4.28778	3.3626		+	Cluster 407		9	66.9	19.075	0	56.982	1208300000	125	5.8389	0.00493532	AFT92238.1	50S ribosomal protein L6 [Francisella tularensis subsp. holarctica FSC200]	FTS_0248	rplF		Translation, ribosomal structure and biogenesis	J	COG0097	RplF	Ribosomal protein L6P/L9E	Ribosome	RP-L6, large subunit ribosomal protein L6	K02933	This protein binds to the 23S rRNA, and is important in its secondary structure. It is located near the subunit interface in the base of the L7 L12 stalk, and near the tRNA binding site of the peptidyltransferase center (By similarity)	GO:0003674;GO:0003735;GO:0005198;GO:0005575;GO:0005618;GO:0005623;GO:0005886;GO:0006412;GO:0008150;GO:0008152;GO:0009058;GO:0009059;GO:0009987;GO:0010467;GO:0016020;GO:0019538;GO:0030312;GO:0034645;GO:0040007;GO:0043170;GO:0044237;GO:0044238;GO:0044249;GO:0044260;GO:0044267;GO:0044464;GO:0071704;GO:0071944;GO:1901576	Cytoplasmic		control_lowpH;25C_lowpH;oxidative_lowpH;agar_lowpH;control_42C;25C_42C;oxidative_42C;agar_42C
5.2896	5.75838	-5.36209	-5.75838	5.16365	4.02596		+	Cluster 407		24	45.9	49.321	0	267.03	9249900000	453	6.66557	0.00914961	AFT93266.1	Type IV pili, pilus assembly protein [Francisella tularensis subsp. holarctica FSC200]	FTS_1617	fimV												Unknown		control_lowpH;agar_lowpH;oxidative_lowpH;25C_lowpH;control_42C;agar_42C;oxidative_42C;25C_42C;25C_control;25C_agar
5.51587	5.6406	-5.6406	-5.25988	4.60261	4.00866		+	Cluster 407		9	15.2	74.252	0	24.81	220380000	49	6.57527	0.00364706	AFT92279.1	hypothetical protein FTS_0295 [Francisella tularensis subsp. holarctica FSC200]	FTS_0295													Unknown		control_lowpH;oxidative_lowpH;agar_lowpH;25C_lowpH;control_42C;oxidative_42C;agar_42C;25C_42C;agar_control;25C_control
5.75886	5.55554	-4.92302	-5.75886	4.94542	3.68331		+	Cluster 407		8	35.8	21.597	0	37.368	829080000	85	6.47839	0.0162515	AFT92649.1	Type IV pili associated protein [Francisella tularensis subsp. holarctica FSC200]	FTS_0789	pilN		Cell motility;Extracellular structures	N;W	COG3166	PilN	Tfp pilus assembly protein PilN		pilN, type IV pilus assembly protein PilN	K02663			Unknown		control_42C;oxidative_42C;agar_42C;25C_42C;control_lowpH;oxidative_lowpH;agar_lowpH;25C_lowpH;25C_control
5.76187	4.72942	-5.35319	-5.76187	5.05085	4.21087		+	Cluster 407		31	50.7	67.353	0	185.75	2254500000	288	6.49982	0.0362876	AFT92640.1	hypothetical protein FTS_0778 [Francisella tularensis subsp. holarctica FSC200]	FTS_0778			Function unknown	S							Sel1 repeat		Cytoplasmic		control_lowpH;agar_lowpH;oxidative_lowpH;25C_lowpH;control_42C;agar_42C;oxidative_42C;25C_42C;25C_control;25C_agar
4.63919	6.1895	-4.86934	-6.1895	4.88333	3.42048		+	Cluster 407		13	35.8	46.804	0	162.55	1446700000	137	6.20444	0.00382222	AFT92763.1	HlyC/CorC family transporter-associated protein [Francisella tularensis subsp. holarctica FSC200]	FTS_0932			Inorganic ion transport and metabolism	P							Mg2 and Co2 transporter CorB	GO:0000041;GO:0003674;GO:0005215;GO:0005575;GO:0005623;GO:0005886;GO:0006810;GO:0006811;GO:0006812;GO:0006824;GO:0008150;GO:0008324;GO:0009987;GO:0010035;GO:0010038;GO:0015075;GO:0015087;GO:0015095;GO:0015693;GO:0016020;GO:0022857;GO:0022890;GO:0022891;GO:0022892;GO:0030001;GO:0034220;GO:0042221;GO:0044464;GO:0044699;GO:0044763;GO:0044765;GO:0046873;GO:0046915;GO:0050896;GO:0051179;GO:0051234;GO:…	CytoplasmicMembrane		control_lowpH;oxidative_lowpH;agar_lowpH;25C_lowpH;control_42C;oxidative_42C;agar_42C;25C_42C;agar_control;25C_control;25C_oxidative
5.32386	6.05274	-5.29509	-6.05274	4.75766	3.2263		+	Cluster 407		31	60.4	55.536	0	323.31	29047000000	720	6.51555	0.00914516	AFT93372.1	F0F1 ATP synthase subunit alpha [Francisella tularensis subsp. holarctica FSC200]	FTS_1753	atpA		Energy production and conversion	C	COG0056	AtpA	FoF1-type ATP synthase, alpha subunit	Metabolic pathways;Oxidative phosphorylation	ATPF1A, F-type H+transporting ATPase subunit alpha [EC:3.6.3.14]	K02111	Produces ATP from ADP in the presence of a proton gradient across the membrane. The alpha chain is a regulatory subunit (By similarity)	GO:0003674;GO:0003824;GO:0005215;GO:0005575;GO:0005618;GO:0005622;GO:0005623;GO:0005737;GO:0005886;GO:0006139;GO:0006152;GO:0006163;GO:0006164;GO:0006195;GO:0006200;GO:0006725;GO:0006753;GO:0006754;GO:0006793;GO:0006796;GO:0006807;GO:0006810;GO:0006811;GO:0006812;GO:0006818;GO:0008150;GO:0008152;GO:0008324;GO:0009056;GO:0009058;GO:0009116;GO:0009117;GO:0009119;GO:0009123;GO:0009124;GO:0009125;GO:…	Cytoplasmic		control_lowpH;agar_lowpH;oxidative_lowpH;25C_lowpH;control_42C;agar_42C;oxidative_42C;25C_42C;25C_control
5.04909	6.06636	-6.06636	-5.26167	4.58363	3.53049		+	Cluster 407		19	50.8	47.585	0	231.61	3092700000	279	6.37885	0.00318987	AFT93399.1	NADH dehydrogenase subunit D [Francisella tularensis subsp. holarctica FSC200]	FTS_1784	nuoD		Energy production and conversion	C	COG0649	NuoD	NADH:ubiquinone oxidoreductase 49 kD subunit (chain D)	Metabolic pathways;Oxidative phosphorylation	nuoD, NADH-quinone oxidoreductase subunit D [EC:1.6.5.3]	K00333	NDH-1 shuttles electrons from NADH, via FMN and iron- sulfur (Fe-S) centers, to quinones in the respiratory chain. The immediate electron acceptor for the enzyme in this species is believed to be ubiquinone. Couples the redox reaction to proton translocation (for every two electrons transferred, four hydrogen ions are translocated across the cytoplasmic membrane), and thus conserves the redox ene…	GO:0003674;GO:0003824;GO:0003954;GO:0005575;GO:0005622;GO:0005623;GO:0005737;GO:0005886;GO:0008150;GO:0008152;GO:0016020;GO:0016491;GO:0016651;GO:0016655;GO:0044424;GO:0044464;GO:0044710;GO:0050136;GO:0055114;GO:0071944	Cytoplasmic		control_42C;oxidative_42C;agar_42C;25C_42C;control_lowpH;oxidative_lowpH;agar_lowpH;25C_lowpH;agar_control;25C_control
4.67187	6.45364	-5.69337	-6.45364	5.04045	3.54856		+	Cluster 407		32	54.6	70.751	0	167.9	4497300000	470	6.63871	0.00367251	AFT93129.1	ATP-dependent metalloprotease [Francisella tularensis subsp. holarctica FSC200]	FTS_1435	hflB		Posttranslational modification, protein turnover, chaperones	O	COG0465	HflB	ATP-dependent Zn proteases		ftsH, cell division protease FtsH [EC:3.4.24.-]	K03798	Acts as a processive, ATP-dependent zinc metallopeptidase for both cytoplasmic and membrane proteins. Plays a role in the quality control of integral membrane proteins (By similarity)	GO:0000003;GO:0000910;GO:0003674;GO:0003824;GO:0004175;GO:0004222;GO:0005488;GO:0005575;GO:0005623;GO:0005886;GO:0006139;GO:0006152;GO:0006163;GO:0006195;GO:0006200;GO:0006508;GO:0006725;GO:0006753;GO:0006793;GO:0006796;GO:0006807;GO:0007049;GO:0008150;GO:0008152;GO:0008233;GO:0008237;GO:0008270;GO:0009056;GO:0009116;GO:0009117;GO:0009119;GO:0009123;GO:0009125;GO:0009126;GO:0009128;GO:0009141;GO:…	CytoplasmicMembrane		control_42C;oxidative_42C;agar_42C;25C_42C;control_lowpH;oxidative_lowpH;agar_lowpH;25C_lowpH;25C_control
4.11874	5.38494	-4.93458	-5.38494	4.54905	2.98711		+	Cluster 407		11	57.1	25.351	0	223.48	6328300000	282	5.92545	0.0163059	AFT93217.1	hypothetical protein FTS_1550 [Francisella tularensis subsp. holarctica FSC200]	FTS_1550													Unknown		agar_lowpH;control_lowpH;oxidative_lowpH;25C_lowpH;agar_42C;control_42C;oxidative_42C;25C_42C;25C_agar;25C_control
5.10441	5.3835	-5.3835	-5.21063	4.45071	2.71486		+	Cluster 407		7	39.8	12.865	0	160.44	8445100000	320	6.33809	0.0124056	AFT92685.1	preprotein translocase family protein [Francisella tularensis subsp. holarctica FSC200]	FTS_0837	yajC		Intracellular trafficking, secretion, and vesicular transport	U	COG1862	YajC	Preprotein translocase subunit YajC	Bacterial secretion system;Protein export;Quorum sensing	yajC, preprotein translocase subunit YajC	K03210	Preprotein translocase, subunit YajC	GO:0005575;GO:0005623;GO:0005886;GO:0005887;GO:0016020;GO:0016021;GO:0031224;GO:0031226;GO:0044425;GO:0044459;GO:0044464;GO:0071944	CytoplasmicMembrane		agar_lowpH;control_lowpH;oxidative_lowpH;25C_lowpH;agar_42C;control_42C;oxidative_42C;25C_42C;25C_agar
4.87591	5.72981	-5.72981	-5.02691	4.81814	3.27372		+	Cluster 407		12	32.4	54.719	0	100.57	727640000	114	6.25119	0.0055	AFT92951.1	cardiolipin synthase [Francisella tularensis subsp. holarctica FSC200]	FTS_1180			Lipid transport and metabolism	I	COG1502	Cls	Phosphatidylserine/phosphatidylglycerophosphate/cardiolipin synthase or related enzyme	Glycerophospholipid metabolism;Metabolic pathways	clsA_B, cardiolipin synthase A/B [EC:2.7.8.-]	K06131	Catalyzes the reversible phosphatidyl group transfer from one phosphatidylglycerol molecule to another to form cardiolipin (CL) (diphosphatidylglycerol) and glycerol (By similarity)	GO:0003674;GO:0003824;GO:0005575;GO:0005623;GO:0005886;GO:0006082;GO:0006629;GO:0006631;GO:0006633;GO:0008150;GO:0008152;GO:0008610;GO:0008808;GO:0009058;GO:0009987;GO:0016020;GO:0016053;GO:0016740;GO:0016772;GO:0016780;GO:0019752;GO:0030572;GO:0032787;GO:0043436;GO:0044237;GO:0044238;GO:0044249;GO:0044255;GO:0044281;GO:0044283;GO:0044464;GO:0044710;GO:0044711;GO:0046394;GO:0071704;GO:0071944;GO:…	CytoplasmicMembrane		control_lowpH;agar_lowpH;oxidative_lowpH;25C_lowpH;control_42C;agar_42C;oxidative_42C;25C_42C;25C_control;25C_agar
3.52884	5.91623	-4.97919	-5.91623	4.89354	3.96197		+	Cluster 407		6	27.7	26.247	0	66.092	2670200000	146	6.09213	0.00921951	AFT92303.1	TolQ protein [Francisella tularensis subsp. holarctica FSC200]	FTS_0329	tolQ		Intracellular trafficking, secretion, and vesicular transport	U	COG0811	TolQ	Biopolymer transport protein ExbB/TolQ	Microbial metabolism in diverse environments	tolQ, biopolymer transport protein TolQ	K03562	tolQ protein	GO:0003674;GO:0005215;GO:0005575;GO:0005623;GO:0005886;GO:0006810;GO:0008104;GO:0008150;GO:0008565;GO:0015031;GO:0015833;GO:0016020;GO:0016021;GO:0017038;GO:0022892;GO:0031224;GO:0033036;GO:0042886;GO:0043213;GO:0044425;GO:0044464;GO:0044699;GO:0044765;GO:0045184;GO:0051179;GO:0051234;GO:0071702;GO:0071705;GO:0071944	CytoplasmicMembrane		control_lowpH;agar_lowpH;oxidative_lowpH;25C_lowpH;control_42C;agar_42C;oxidative_42C;25C_42C;25C_control
3.69476	5.95074	-4.91231	-5.95074	4.73512	4.45922		+	Cluster 407		5	34.7	11.718	0	28.983	404000000	59	6.10854	0.00159292	AFT92236.1	30S ribosomal protein S14 [Francisella tularensis subsp. holarctica FSC200]	FTS_0246	rpsN		Translation, ribosomal structure and biogenesis	J	COG0199	RpsN	Ribosomal protein S14	Ribosome	RP-S14, small subunit ribosomal protein S14	K02954	Binds 16S rRNA, required for the assembly of 30S particles and may also be responsible for determining the conformation of the 16S rRNA at the A site (By similarity)	GO:0003674;GO:0003735;GO:0005198;GO:0005575;GO:0005622;GO:0005623;GO:0005737;GO:0005829;GO:0005840;GO:0006412;GO:0008150;GO:0008152;GO:0009058;GO:0009059;GO:0009987;GO:0010467;GO:0015935;GO:0019538;GO:0022626;GO:0022627;GO:0030529;GO:0032991;GO:0034645;GO:0043170;GO:0043226;GO:0043228;GO:0043229;GO:0043232;GO:0044237;GO:0044238;GO:0044249;GO:0044260;GO:0044267;GO:0044391;GO:0044422;GO:0044424;GO:…	Cytoplasmic		control_lowpH;oxidative_lowpH;agar_lowpH;25C_lowpH;control_42C;oxidative_42C;agar_42C;25C_42C;25C_control;25C_oxidative;25C_agar
4.37686	6.23245	-5.18752	-6.23245	5.21669	3.9349		+	Cluster 407		7	67.7	17.258	0	60.52	509860000	64	6.40078	0.00694931	AFT93401.1	NADH dehydrogenase subunit B [Francisella tularensis subsp. holarctica FSC200]	FTS_1786	nuoB		Energy production and conversion	C	COG0377	NuoB	NADH:ubiquinone oxidoreductase 20 kD subunit (chhain B) or related Fe-S oxidoreductase	Metabolic pathways;Oxidative phosphorylation	nuoB, NADH-quinone oxidoreductase subunit B [EC:1.6.5.3]	K00331	NDH-1 shuttles electrons from NADH, via FMN and iron- sulfur (Fe-S) centers, to quinones in the respiratory chain. The immediate electron acceptor for the enzyme in this species is believed to be ubiquinone. Couples the redox reaction to proton translocation (for every two electrons transferred, four hydrogen ions are translocated across the cytoplasmic membrane), and thus conserves the redox ene…	GO:0003674;GO:0003824;GO:0003954;GO:0005575;GO:0005623;GO:0005886;GO:0008150;GO:0008152;GO:0016020;GO:0016491;GO:0016651;GO:0016655;GO:0044464;GO:0044710;GO:0050136;GO:0055114;GO:0071944	CytoplasmicMembrane		agar_lowpH;control_lowpH;oxidative_lowpH;25C_lowpH;agar_42C;control_42C;oxidative_42C;25C_42C;25C_agar;25C_control
4.77524	5.83266	-5.52397	-5.83266	4.78926	3.81266		+	Cluster 407		12	39	36.081	0	249.86	5754600000	252	6.48889	0.0140658	AFT93235.1	glycosyl transferase, group 2 [Francisella tularensis subsp. holarctica FSC200]	FTS_1572	wcaA		Cell wall/membrane/envelope biogenesis	M							Catalyzes the transfer of 4-deoxy-4-formamido-L- arabinose from UDP to undecaprenyl phosphate. The modified arabinose is attached to lipid A and is required for resistance to polymyxin and cationic antimicrobial peptides (By similarity)	GO:0005575;GO:0005623;GO:0005886;GO:0016020;GO:0044464;GO:0071944	CytoplasmicMembrane		42C_lowpH;control_lowpH;oxidative_lowpH;agar_lowpH;25C_lowpH;oxidative_42C;agar_42C;25C_42C;agar_control;25C_control
4.55698	6.49948	-5.32489	-6.49948	4.47782	4.44114		+	Cluster 407		11	53.7	18.862	0	105.27	1116200000	122	6.42008	0.00824779	AFT93394.1	NADH dehydrogenase subunit I [Francisella tularensis subsp. holarctica FSC200]	FTS_1779	nuoI		Energy production and conversion	C	COG1143	NuoI	Formate hydrogenlyase subunit 6/NADH:ubiquinone oxidoreductase 23 kD subunit (chain I)	Metabolic pathways;Oxidative phosphorylation	nuoI, NADH-quinone oxidoreductase subunit I [EC:1.6.5.3]	K00338	NDH-1 shuttles electrons from NADH, via FMN and iron- sulfur (Fe-S) centers, to quinones in the respiratory chain. The immediate electron acceptor for the enzyme in this species is believed to be ubiquinone. Couples the redox reaction to proton translocation (for every two electrons transferred, four hydrogen ions are translocated across the cytoplasmic membrane), and thus conserves the redox ene…	GO:0003674;GO:0003824;GO:0003954;GO:0005575;GO:0005623;GO:0005886;GO:0008150;GO:0008152;GO:0016020;GO:0016491;GO:0016651;GO:0016655;GO:0044464;GO:0044710;GO:0050136;GO:0055114;GO:0071944	Cytoplasmic		42C_lowpH;control_lowpH;agar_lowpH;oxidative_lowpH;25C_lowpH;control_42C;agar_42C;oxidative_42C;25C_42C;25C_control
4.16153	5.98925	-5.09165	-5.98925	5.43824	4.22358		+	Cluster 407		2	42	10.359	0	33.585	435840000	32	6.41167	0.00115888	AFT93183.1	30S ribosomal protein S15 [Francisella tularensis subsp. holarctica FSC200]	FTS_1502	rpsO		Translation, ribosomal structure and biogenesis	J	COG0184	RpsO	Ribosomal protein S15P/S13E	Ribosome	RP-S15, small subunit ribosomal protein S15	K02956	One of the primary rRNA binding proteins, it binds directly to 16S rRNA where it helps nucleate assembly of the platform of the 30S subunit by binding and bridging several RNA helices of the 16S rRNA (By similarity)	GO:0003674;GO:0003676;GO:0003723;GO:0003735;GO:0005198;GO:0005488;GO:0005575;GO:0005622;GO:0005623;GO:0005737;GO:0005829;GO:0005840;GO:0005886;GO:0006139;GO:0006378;GO:0006396;GO:0006397;GO:0006412;GO:0006725;GO:0006807;GO:0008150;GO:0008152;GO:0009058;GO:0009059;GO:0009987;GO:0010467;GO:0015935;GO:0016020;GO:0016070;GO:0016071;GO:0019538;GO:0019843;GO:0022626;GO:0022627;GO:0030529;GO:0031123;GO:…	Cytoplasmic		42C_lowpH;control_lowpH;agar_lowpH;oxidative_lowpH;25C_lowpH;agar_42C;oxidative_42C;25C_42C;25C_control
5.21274	5.82114	-4.05921	-5.82114	4.41754	3.24132		+	Cluster 407		16	91	15.737	0	180.05	2359900000	203	5.92375	0.00375281	AFT93369.1	F0F1 ATP synthase subunit epsilon [Francisella tularensis subsp. holarctica FSC200]	FTS_1750	atpC		Energy production and conversion	C	COG0355	AtpC	FoF1-type ATP synthase, epsilon subunit	Metabolic pathways;Oxidative phosphorylation	ATPF1E, F-type H+transporting ATPase subunit epsilon	K02114	Produces ATP from ADP in the presence of a proton gradient across the membrane (By similarity)	GO:0003674;GO:0003824;GO:0005215;GO:0005575;GO:0005622;GO:0005623;GO:0005886;GO:0006139;GO:0006152;GO:0006163;GO:0006164;GO:0006195;GO:0006200;GO:0006725;GO:0006753;GO:0006754;GO:0006793;GO:0006796;GO:0006807;GO:0006810;GO:0006811;GO:0006812;GO:0006818;GO:0008150;GO:0008152;GO:0008324;GO:0009056;GO:0009058;GO:0009116;GO:0009117;GO:0009119;GO:0009123;GO:0009124;GO:0009125;GO:0009126;GO:0009127;GO:…	Unknown		lowpH_42C;oxidative_42C;agar_42C;control_42C;25C_42C;oxidative_lowpH;agar_lowpH;control_lowpH;25C_lowpH;control_oxidative;25C_oxidative;control_agar;25C_agar
4.70417	6.04164	-4.15671	-6.04164	5.28574	4.25581		+	Cluster 407		9	37.2	28.838	0	73.636	1576000000	145	6.10167	0.00801778	AFT92106.1	acyltransferase [Francisella tularensis subsp. holarctica FSC200]	FTS_0079			Lipid transport and metabolism	I	COG0204	PlsC	1-acyl-sn-glycerol-3-phosphate acyltransferase	Biosynthesis of secondary metabolites;Glycerolipid metabolism;Glycerophospholipid metabolism;Metabolic pathways	plsC, 1-acyl-sn-glycerol-3-phosphate acyltransferase [EC:2.3.1.51]	K00655	Phospholipid glycerol acyltransferase	GO:0005575;GO:0005623;GO:0005886;GO:0006629;GO:0008150;GO:0008152;GO:0009372;GO:0009987;GO:0016020;GO:0042592;GO:0044237;GO:0044238;GO:0044255;GO:0044464;GO:0044710;GO:0044764;GO:0048872;GO:0048874;GO:0051704;GO:0065007;GO:0065008;GO:0071704;GO:0071944	CytoplasmicMembrane		oxidative_lowpH;agar_lowpH;control_lowpH;25C_lowpH;oxidative_42C;agar_42C;control_42C;25C_42C;25C_oxidative;25C_agar
4.67752	5.91364	-3.97547	-5.91364	5.33618	3.80899		+	Cluster 407		3	7.7	44.315	0	15.094	204450000	24	6.01456	0.0034491	AFT93155.1	C4-dicarboxylate transport protein [Francisella tularensis subsp. holarctica FSC200]	FTS_1465	dctA		Energy production and conversion	C	COG1301	GltP	Na+/H+-dicarboxylate symporter	Two-component system	dctA, aerobic C4-dicarboxylate transport protein	K11103	Responsible for the transport of dicarboxylates such as succinate, fumarate, and malate from the periplasm across the membrane (By similarity)	GO:0003333;GO:0003674;GO:0005215;GO:0005310;GO:0005342;GO:0005575;GO:0005623;GO:0005886;GO:0006810;GO:0006811;GO:0006812;GO:0006818;GO:0006820;GO:0006835;GO:0006865;GO:0006950;GO:0006974;GO:0008150;GO:0008324;GO:0008509;GO:0008514;GO:0009987;GO:0015075;GO:0015077;GO:0015078;GO:0015138;GO:0015140;GO:0015141;GO:0015171;GO:0015172;GO:0015179;GO:0015183;GO:0015291;GO:0015293;GO:0015294;GO:0015295;GO:…	CytoplasmicMembrane		oxidative_lowpH;control_lowpH;agar_lowpH;25C_lowpH;oxidative_42C;control_42C;agar_42C;25C_42C;agar_oxidative;25C_oxidative
4.24044	6.81381	-6.81381	-5.42839	4.10149	6.46626		+	Cluster 407		33	44.5	103.59	0	198.78	1248700000	193	7.08356	0.00114286	AFT93125.1	preprotein translocase subunit SecA [Francisella tularensis subsp. holarctica FSC200]	FTS_1429	secA		Intracellular trafficking, secretion, and vesicular transport	U	COG0653	SecA	Preprotein translocase subunit SecA (ATPase, RNA helicase)	Bacterial secretion system;Protein export;Quorum sensing	secA, preprotein translocase subunit SecA	K03070	Part of the Sec protein translocase complex. Interacts with the SecYEG preprotein conducting channel. Has a central role in coupling the hydrolysis of ATP to the transfer of proteins into and across the cell membrane, serving both as a receptor for the preprotein-SecB complex and as an ATP-driven molecular motor driving the stepwise translocation of polypeptide chains across the membrane (By simi…	GO:0000166;GO:0001882;GO:0001883;GO:0003674;GO:0003824;GO:0005488;GO:0005524;GO:0005575;GO:0005576;GO:0005618;GO:0005622;GO:0005623;GO:0005737;GO:0005829;GO:0005886;GO:0006139;GO:0006152;GO:0006163;GO:0006195;GO:0006200;GO:0006605;GO:0006725;GO:0006753;GO:0006793;GO:0006796;GO:0006807;GO:0006810;GO:0006886;GO:0006950;GO:0006952;GO:0008104;GO:0008150;GO:0008152;GO:0009056;GO:0009116;GO:0009117;GO:…	Cytoplasmic		oxidative_42C;agar_42C;control_42C;25C_42C;oxidative_lowpH;agar_lowpH;control_lowpH;25C_lowpH;control_oxidative;25C_oxidative
4.59873	6.58806	-6.01981	-6.58806	3.83722	5.18757		+	Cluster 407		16	30.7	71.808	0	72.607	650850000	134	6.84488	0.00158559	AFT92499.1	glutamine amidotransferase/asparagine synthase [Francisella tularensis subsp. holarctica FSC200]	FTS_0599	wbtH		Amino acid transport and metabolism	E	COG0367	AsnB	Asparagine synthetase B (glutamine-hydrolyzing)	Alanine, aspartate and glutamate metabolism;Biosynthesis of secondary metabolites;Metabolic pathways	asnB, asparagine synthase (glutamine-hydrolysing) [EC:6.3.5.4]	K01953	asparagine synthetase		Cytoplasmic		oxidative_42C;25C_42C;control_42C;agar_42C;oxidative_lowpH;25C_lowpH;control_lowpH;agar_lowpH
5.58168	6.05994	-5.85895	-6.05994	3.60827	5.05805		+	Cluster 407		5	27.8	27.917	0	57.137	241610000	43	6.94892	0	AFT92083.1	dihydroorotate oxidase [Francisella tularensis subsp. holarctica FSC200]	FTS_0044	pyrD		Nucleotide transport and metabolism	F				Metabolic pathways;Pyrimidine metabolism	DHODH, dihydroorotate dehydrogenase [EC:1.3.5.2]	K00254	Dihydroorotate dehydrogenase	GO:0005575;GO:0005622;GO:0005623;GO:0005737;GO:0044424;GO:0044464	Unknown		control_42C;lowpH_42C;oxidative_42C;agar_42C;25C_42C;25C_control;25C_lowpH;25C_oxidative;25C_agar
4.56164	5.52296	-5.52296	-5.42127	2.86733	4.85247		+	Cluster 407		9	34.4	35.442	0	64.834	439420000	66	6.37961	0.00110345	AFT92454.1	UDP-3-O-[3-hydroxymyristoyl] glucosamine N-acyltransferase [Francisella tularensis subsp. holarctica FSC200]	FTS_0539	lpxD		Cell wall/membrane/envelope biogenesis	M	COG1044	LpxD	UDP-3-O-[3-hydroxymyristoyl] glucosamine N-acyltransferase	Lipopolysaccharide biosynthesis;Metabolic pathways	lpxD, UDP-3-O-[3-hydroxymyristoyl] glucosamine N-acyltransferase [EC:2.3.1.191]	K02536	as the acyl donor. Is involved in the biosynthesis of lipid A, a phosphorylated glycolipid that anchors the lipopolysaccharide to the outer membrane of the cell (By similarity)	GO:0003674;GO:0003824;GO:0005975;GO:0006629;GO:0006643;GO:0006644;GO:0006664;GO:0006793;GO:0006796;GO:0008150;GO:0008152;GO:0008610;GO:0008654;GO:0009058;GO:0009245;GO:0009247;GO:0009311;GO:0009312;GO:0009987;GO:0016051;GO:0016410;GO:0016740;GO:0016746;GO:0016747;GO:0019637;GO:0044237;GO:0044238;GO:0044249;GO:0044255;GO:0044710;GO:0044723;GO:0046467;GO:0046493;GO:0071704;GO:0090407;GO:1901135;GO:…	Cytoplasmic		control_42C;oxidative_42C;agar_42C;25C_42C;control_lowpH;oxidative_lowpH;agar_lowpH;25C_lowpH;25C_control;25C_oxidative;25C_agar
5.49153	4.67656	-5.49153	-4.12763	4.28762	4.6955		+	Cluster 407		16	55.5	30.401	0	180.98	2631700000	217	5.8556	0.00109091	AFT92226.1	50S ribosomal protein L2 [Francisella tularensis subsp. holarctica FSC200]	FTS_0236	rplB		Translation, ribosomal structure and biogenesis	J	COG0090	RplB	Ribosomal protein L2	Ribosome	RP-L2, large subunit ribosomal protein L2	K02886	One of the primary rRNA binding proteins. Required for association of the 30S and 50S subunits to form the 70S ribosome, for tRNA binding and peptide bond formation. It has been suggested to have peptidyltransferase activity	GO:0003674;GO:0003735;GO:0005198;GO:0005488;GO:0005575;GO:0005622;GO:0005623;GO:0005737;GO:0005840;GO:0005886;GO:0006412;GO:0008150;GO:0008152;GO:0008270;GO:0009058;GO:0009059;GO:0009987;GO:0010467;GO:0015934;GO:0016020;GO:0019538;GO:0030529;GO:0032991;GO:0034645;GO:0040007;GO:0043167;GO:0043169;GO:0043170;GO:0043226;GO:0043228;GO:0043229;GO:0043232;GO:0044237;GO:0044238;GO:0044249;GO:0044260;GO:…	Cytoplasmic		control_42C;oxidative_42C;agar_42C;25C_42C;oxidative_lowpH;agar_lowpH;25C_lowpH;oxidative_control;agar_control;25C_control;25C_oxidative
5.44431	8.40252	-8.40252	-5.15716	5.19674	-5.59374		+	Cluster 415		2	19.5	9.0716	0	3.8193	318560000	28	7.77506	0.00234146	AFT93326.1	30S ribosomal protein S16 [Francisella tularensis subsp. holarctica FSC200]	FTS_1695	rpsP		Translation, ribosomal structure and biogenesis	J	COG0228	RpsP	Ribosomal protein S16	Ribosome	RP-S16, small subunit ribosomal protein S16	K02959	30s ribosomal protein s16	GO:0000028;GO:0003674;GO:0003676;GO:0003677;GO:0003735;GO:0003824;GO:0004518;GO:0004519;GO:0004520;GO:0004536;GO:0005198;GO:0005488;GO:0005575;GO:0005622;GO:0005623;GO:0005737;GO:0005829;GO:0005840;GO:0005886;GO:0006139;GO:0006412;GO:0006725;GO:0006807;GO:0006996;GO:0008150;GO:0008152;GO:0009058;GO:0009059;GO:0009987;GO:0010467;GO:0015935;GO:0016020;GO:0016043;GO:0016787;GO:0016788;GO:0019538;GO:…	Cytoplasmic		control_42C;oxidative_42C;agar_42C;25C_42C;control_lowpH;oxidative_lowpH;agar_lowpH;25C_lowpH;25C_control;25C_oxidative;25C_agar
6.39597	8.77035	-8.77035	-8.0442	5.5167	-5.70112		+	Cluster 415		28	44.9	75.501	0	323.31	4544400000	270	8.71037	0	AFT93182.1	polynucleotide phosphorylase/polyadenylase [Francisella tularensis subsp. holarctica FSC200]	FTS_1501	pnp		Translation, ribosomal structure and biogenesis	J	COG1185	Pnp	Polyribonucleotide nucleotidyltransferase (polynucleotide phosphorylase)	Purine metabolism;Pyrimidine metabolism;RNA degradation	pnp, polyribonucleotide nucleotidyltransferase [EC:2.7.7.8]	K00962	Involved in mRNA degradation. Hydrolyzes single-stranded polyribonucleotides processively in the 3'- to 5'-direction (By similarity)	GO:0000166;GO:0000175;GO:0003674;GO:0003676;GO:0003723;GO:0003729;GO:0003824;GO:0004518;GO:0004527;GO:0004532;GO:0004540;GO:0004654;GO:0005488;GO:0005575;GO:0005618;GO:0005622;GO:0005623;GO:0005737;GO:0005829;GO:0005886;GO:0006139;GO:0006401;GO:0006402;GO:0006725;GO:0006807;GO:0008150;GO:0008152;GO:0008408;GO:0009056;GO:0009057;GO:0009987;GO:0016020;GO:0016070;GO:0016071;GO:0016740;GO:0016772;GO:…	Cytoplasmic		oxidative_42C;agar_42C;25C_42C;oxidative_control;agar_control;25C_control;oxidative_lowpH;agar_lowpH;25C_lowpH;agar_oxidative;25C_oxidative
6.30076	7.44141	-7.44141	-6.77968	5.69013	-5.39458		+	Cluster 415		4	8.3	56.228	0	34.666	233200000	23	7.87299	0.00117647	AFT92502.1	O-antigen flippase [Francisella tularensis subsp. holarctica FSC200]	FTS_0602			Cell wall/membrane/envelope biogenesis	M							polysaccharide biosynthesis		CytoplasmicMembrane		control_42C;oxidative_42C;25C_42C;agar_42C;control_lowpH;oxidative_lowpH;25C_lowpH;agar_lowpH;25C_control;agar_control;25C_oxidative;agar_oxidative;agar_25C
4.90155	7.98533	-7.98533	-7.74638	4.67814	-5.41267		+	Cluster 415		3	10.3	30.76	0.0073452	2.3418	297430000	6	8.02163	0.00326531	AFT93105.1	hypothetical protein FTS_1399 [Francisella tularensis subsp. holarctica FSC200]	FTS_1399			Function unknown	S							LicD family		Cytoplasmic		control_lowpH;oxidative_lowpH;agar_lowpH;25C_lowpH;control_42C;oxidative_42C;agar_42C;25C_42C;agar_control;25C_control;agar_oxidative;25C_oxidative
7.44127	7.53413	-7.53413	-6.35324	4.41123	-6.96513		+	Cluster 415		25	57.9	57.917	0	323.31	4254600000	364	8.46315	0.00168595	AFT92909.1;AFT92121.1	intracellular growth locus protein B [Francisella tularensis subsp. holarctica FSC200];intracellular growth locus protein B [Francisella tularensis subsp. holarctica FSC200]	FTS_1126;FTS_0098	iglB2;iglB1		Intracellular trafficking, secretion, and vesicular transport;Intracellular trafficking, secretion, and vesicular transport	U	COG3517;COG3517	COG3517;COG3517	Predicted component of the type VI protein secretion system;Predicted component of the type VI protein secretion system		impC, type VI secretion system protein ImpC;impC, type VI secretion system protein ImpC	K11900;K11900	type VI secretion protein, EvpB VC_A0108 family;type VI secretion protein, EvpB VC_A0108 family		Cytoplasmic		oxidative_control;25C_control;agar_control;25C_42C;agar_42C;25C_lowpH;agar_lowpH;agar_oxidative
8.11832	6.66196	-8.11832	-7.62303	4.88712	-6.18785		+	Cluster 415		8	48.1	23.204	0	31.104	276550000	45	8.39291	0	AFT93427.1	protein-L-isoaspartate O-methyltransferase [Francisella tularensis subsp. holarctica FSC200]	FTS_1818	pcm		Posttranslational modification, protein turnover, chaperones	O	COG2518	Pcm	Protein-L-isoaspartate O-methyltransferase		E2.1.1.77, protein-L-isoaspartate(D-aspartate) O-methyltransferase [EC:2.1.1.77]	K00573	O-methyltransferase EC 2.1.1.77	GO:0005575;GO:0005622;GO:0005623;GO:0005737;GO:0044424;GO:0044464	Cytoplasmic		42C_control;oxidative_control;25C_control;agar_control;agar_lowpH;agar_42C;agar_oxidative
8.51627	8.69061	-8.62486	-8.69061	5.57941	-6.43011		+	Cluster 415		32	68.7	65.86	0	323.31	11401000000	668	9.72119	0	AFT93360.1	succinate dehydrogenase flavoprotein [Francisella tularensis subsp. holarctica FSC200]	FTS_1741	sdhA		Energy production and conversion	C	COG1053	SdhA	Succinate dehydrogenase/fumarate reductase, flavoprotein subunit	Biosynthesis of antibiotics;Biosynthesis of secondary metabolites;Butanoate metabolism;Carbon metabolism;Citrate cycle (TCA cycle);Metabolic pathways;Microbial metabolism in diverse environments;Oxidative phosphorylation	sdhA, succinate dehydrogenase / fumarate reductase, flavoprotein subunit [EC:1.3.5.1 1.3.5.4]	K00239	succinate dehydrogenase, flavoprotein subunit	GO:0000104;GO:0000166;GO:0003674;GO:0003824;GO:0005488;GO:0005575;GO:0005622;GO:0005623;GO:0005737;GO:0005829;GO:0005886;GO:0006091;GO:0006099;GO:0008150;GO:0008152;GO:0009055;GO:0009060;GO:0009987;GO:0015980;GO:0016020;GO:0016491;GO:0016627;GO:0032991;GO:0036094;GO:0043167;GO:0043168;GO:0043234;GO:0044237;GO:0044238;GO:0044424;GO:0044425;GO:0044444;GO:0044459;GO:0044464;GO:0044710;GO:0045273;GO:…	CytoplasmicMembrane		oxidative_control;25C_control;agar_control;oxidative_42C;25C_42C;agar_42C;25C_lowpH;agar_lowpH
5.06809	4.00436	-3.38061	-3.2607	2.46795	-5.06809		+	Cluster 415		7	31.7	26.373	0	32.694	408600000	45	4.97359	0.022396	AFT93452.1	cell division protein FtsQ [Francisella tularensis subsp. holarctica FSC200]	FTS_1859	ftsQ		Cell cycle control, cell division, chromosome partitioning	D	COG1589	FtsQ	Cell division septal protein FtsQ		ftsQ, cell division protein FtsQ	K03589	Essential cell division protein. May link together the upstream cell division proteins, which are predominantly cytoplasmic, with the downstream cell division proteins, which are predominantly periplasmic. May control correct divisome assembly (By similarity)	GO:0000003;GO:0000910;GO:0000917;GO:0005575;GO:0005623;GO:0005886;GO:0005887;GO:0007049;GO:0008150;GO:0009987;GO:0016020;GO:0016021;GO:0016043;GO:0019954;GO:0022402;GO:0022607;GO:0031224;GO:0031226;GO:0032153;GO:0032155;GO:0032505;GO:0032506;GO:0043093;GO:0044085;GO:0044425;GO:0044459;GO:0044464;GO:0044699;GO:0044763;GO:0051301;GO:0071840;GO:0071944;GO:0090529	Unknown		oxidative_lowpH;25C_lowpH;agar_lowpH;25C_control;agar_control;25C_42C;agar_42C
4.90361	3.43881	-2.7981	-3.09118	2.51033	-4.90361		+	Cluster 415		9	55.9	30.119	0	52.587	592420000	70	4.59643	0.0198667	AFT93197.1	succinyl-CoA synthetase, alpha subunit [Francisella tularensis subsp. holarctica FSC200]	FTS_1518	sucD		Energy production and conversion	C	COG0074	SucD	Succinyl-CoA synthetase, alpha subunit	Biosynthesis of antibiotics;Biosynthesis of secondary metabolites;C5-Branched dibasic acid metabolism;Carbon metabolism;Citrate cycle (TCA cycle);Metabolic pathways;Microbial metabolism in diverse environments;Propanoate metabolism	sucD, succinyl-CoA synthetase alpha subunit [EC:6.2.1.5]	K01902	Succinyl-CoA ligase ADP-forming subunit alpha	GO:0003674;GO:0003824;GO:0004774;GO:0004775;GO:0006091;GO:0006099;GO:0008150;GO:0008152;GO:0009060;GO:0009987;GO:0015980;GO:0016405;GO:0016874;GO:0016877;GO:0016878;GO:0044237;GO:0044238;GO:0044710;GO:0045333;GO:0055114	Cytoplasmic		oxidative_control;25C_control;agar_control;oxidative_lowpH;25C_lowpH;agar_lowpH;agar_42C
3.42677	2.91418	-3.20656	-2.26946	2.07199	-3.42677		+	Cluster 415		6	16.9	52.393	0	18.144	479310000	31	4.11263	0.0122007	AFT92611.1	hypothetical protein FTS_0737 [Francisella tularensis subsp. holarctica FSC200]	FTS_0737													CytoplasmicMembrane		25C_42C;oxidative_42C;agar_42C;25C_lowpH;oxidative_lowpH;agar_lowpH;oxidative_control;agar_control
3.61999	2.73403	-2.92726	-3.61999	1.73628	-3.01386		+	Cluster 415		8	23.2	55.885	0	107.13	509480000	63	4.05737	0.0186848	AFT92716.1	apolipoprotein N-acyltransferase [Francisella tularensis subsp. holarctica FSC200]	FTS_0873	lnt		Cell wall/membrane/envelope biogenesis	M	COG0815	Lnt	Apolipoprotein N-acyltransferase		lnt, apolipoprotein N-acyltransferase [EC:2.3.1.-]	K03820	Transfers the fatty acyl group on membrane lipoproteins (By similarity)	GO:0003674;GO:0003824;GO:0005575;GO:0005623;GO:0005886;GO:0005887;GO:0006464;GO:0006497;GO:0008150;GO:0008152;GO:0009058;GO:0009059;GO:0009987;GO:0016020;GO:0016021;GO:0016410;GO:0016740;GO:0016746;GO:0016747;GO:0019538;GO:0031224;GO:0031226;GO:0034645;GO:0036211;GO:0042157;GO:0042158;GO:0043170;GO:0043412;GO:0044237;GO:0044238;GO:0044249;GO:0044260;GO:0044267;GO:0044425;GO:0044459;GO:0044464;GO:…	CytoplasmicMembrane		oxidative_lowpH;25C_lowpH;agar_lowpH;oxidative_42C;25C_42C;agar_42C;25C_control;agar_control
3.33492	1.77723	-2.48503	-3.21384	1.64115	-3.33492		+	Cluster 415		3	3.3	73.855	0	4.3705	136630000	25	3.68735	0.016354	AFT93391.1	NADH dehydrogenase I, L subunit [Francisella tularensis subsp. holarctica FSC200]	FTS_1776	nuoL		Energy production and conversion	C	COG1009	NuoL	NADH:ubiquinone oxidoreductase subunit 5 (chain L)/Multisubunit Na+/H+ antiporter, MnhA subunit	Metabolic pathways;Oxidative phosphorylation	nuoL, NADH-quinone oxidoreductase subunit L [EC:1.6.5.3]	K00341	subunit l	GO:0005575;GO:0005622;GO:0005623;GO:0005737;GO:0005886;GO:0009579;GO:0016020;GO:0034357;GO:0042716;GO:0042717;GO:0044424;GO:0044436;GO:0044444;GO:0044464;GO:0071944	CytoplasmicMembrane		agar_lowpH;oxidative_lowpH;25C_lowpH;25C_control;25C_42C
3.02632	2.32876	-3.02632	-2.08222	2.83389	-1.94523		+	Cluster 415		5	13.4	47.726	0	42.268	398500000	48	3.6576	0.0476473	AFT93378.1	major facilitator transporter [Francisella tularensis subsp. holarctica FSC200]	FTS_1759											Major facilitator superfamily (MFS) transport protein		CytoplasmicMembrane		agar_lowpH;oxidative_lowpH;25C_lowpH;agar_42C;oxidative_42C;25C_42C;oxidative_control;25C_control
2.75674	2.29516	-2.55065	-2.75674	1.92546	-2.00252		+	Cluster 415		4	34.5	17.816	0	11.422	260310000	56	3.55188	0.0175084	AFT93340.1	small conductance mechanosensitive ion channel (MscS) family protein [Francisella tularensis subsp. holarctica FSC200]	FTS_1714			Cell wall/membrane/envelope biogenesis	M	COG0668	MscS	Small-conductance mechanosensitive channel		mscS, small conductance mechanosensitive channel	K03442	mscS Mechanosensitive ion channel		CytoplasmicMembrane		oxidative_42C;agar_42C;25C_42C;25C_lowpH;25C_control
2.21225	3.75559	-1.78933	-3.75559	2.46927	-2.63711		+	Cluster 415		3	7.5	50.527	0	23.442	186850000	31	3.66819	0.0452691	AFT92181.1	major facilitator transporter [Francisella tularensis subsp. holarctica FSC200]	FTS_0186	yajR										Major Facilitator	GO:0005575;GO:0005623;GO:0005886;GO:0016020;GO:0044464;GO:0071944	CytoplasmicMembrane		oxidative_42C;agar_42C;25C_42C;oxidative_lowpH;agar_lowpH;25C_lowpH;agar_control;25C_control
2.23389	3.40136	-2.81431	-3.40136	3.1495	-1.78138		+	Cluster 415		6	28.9	39.156	0	84.135	236040000	54	3.98219	0.00916335	AFT93138.1	membrane protein of unknown function [Francisella tularensis subsp. holarctica FSC200]	FTS_1447			Cell wall/membrane/envelope biogenesis;Cell motility	M;N	COG0795	LptF	Lipopolysaccharide export LptBFGC system, permease protein LptF	ABC transporters	lptG, lipopolysaccharide export system permease protein	K11720	permease YjgP YjgQ family protein	GO:0005575;GO:0005623;GO:0005886;GO:0006810;GO:0006869;GO:0008150;GO:0010876;GO:0015920;GO:0016020;GO:0016021;GO:0031224;GO:0032991;GO:0033036;GO:0043190;GO:0043234;GO:0044425;GO:0044464;GO:0044699;GO:0044765;GO:0051179;GO:0051234;GO:0071702;GO:0071944;GO:1901264	CytoplasmicMembrane		oxidative_42C;agar_42C;25C_42C;agar_lowpH;25C_lowpH;agar_control;25C_control
2.11606	3.22955	-3.22955	-1.96623	1.3415	-1.68943		+	Cluster 415		9	16.2	68.147	0	56.561	728310000	51	3.0608	0.0387589	AFT93234.1	dolichyl-phosphate-mannose-protein mannosyltransferase family protein [Francisella tularensis subsp. holarctica FSC200]	FTS_1569			Cell wall/membrane/envelope biogenesis	M							Catalyzes the transfer of the L-Ara4N moiety of the glycolipid undecaprenyl phosphate-alpha-L-Ara4N to lipid A. The modified arabinose is attached to lipid A and is required for resistance to polymyxin and cationic antimicrobial peptides (By similarity)		CytoplasmicMembrane		oxidative_42C;agar_42C;25C_42C;agar_lowpH;25C_lowpH;agar_control;25C_control
2.9249	3.51284	-3.51284	-2.98281	1.9809	-2.1269		+	Cluster 415		12	42.1	26.953	0	57.62	991090000	123	3.95859	0.034451	AFT92544.1	hypothetical protein FTS_0657 [Francisella tularensis subsp. holarctica FSC200]	FTS_0657													Unknown		oxidative_lowpH;agar_lowpH;25C_lowpH;oxidative_42C;agar_42C;25C_42C;agar_control;25C_control
2.86498	3.44847	-3.44847	-2.61131	1.8358	-2.04766		+	Cluster 415		5	36.7	16.699	0	14.606	157340000	29	3.74213	0.00521569	AFT92274.1	preprotein translocase subunit SecB [Francisella tularensis subsp. holarctica FSC200]	FTS_0290	secB2		Intracellular trafficking, secretion, and vesicular transport	U	COG1952	SecB	Preprotein translocase subunit SecB	Bacterial secretion system;Protein export;Quorum sensing	secB, preprotein translocase subunit SecB	K03071	One of the proteins required for the normal export of preproteins out of the cell cytoplasm. It is a molecular chaperone that binds to a subset of precursor proteins, maintaining them in a translocation-competent state. It also specifically binds to its receptor SecA (By similarity)	GO:0005575;GO:0005622;GO:0005623;GO:0005737;GO:0006605;GO:0006810;GO:0006886;GO:0008104;GO:0008150;GO:0009306;GO:0009987;GO:0015031;GO:0032940;GO:0033036;GO:0034613;GO:0043952;GO:0044424;GO:0044464;GO:0044699;GO:0044763;GO:0044765;GO:0045184;GO:0046903;GO:0046907;GO:0051179;GO:0051234;GO:0051641;GO:0051649;GO:0055085;GO:0070727;GO:0071702;GO:0071806	Cytoplasmic		oxidative_42C;agar_42C;25C_42C;agar_lowpH;25C_lowpH;25C_control
3.10081	3.3583	-3.3583	-2.87394	1.81526	-1.96481		+	Cluster 415		3	9.5	48.059	0	21.161	308820000	27	3.94574	0.018126	AFT92497.1	membrane protein/O-antigen protein [Francisella tularensis subsp. holarctica FSC200]	FTS_0597	wzy												CytoplasmicMembrane		oxidative_42C;agar_42C;25C_42C;oxidative_lowpH;agar_lowpH;25C_lowpH;25C_control
3.03269	3.54219	-3.05826	-3.54219	2.14486	-2.25893		+	Cluster 415		3	8	52.826	0	15.207	1105700000	71	4.09492	0.0121571	AFT92971.1	amino acid antiporter [Francisella tularensis subsp. holarctica FSC200]	FTS_1208			Amino acid transport and metabolism	E	COG0531	PotE	Amino acid transporter	Quorum sensing	gadC, glutamate:GABA antiporter	K20265	amino acid		CytoplasmicMembrane		oxidative_lowpH;agar_lowpH;25C_lowpH;oxidative_42C;agar_42C;25C_42C;oxidative_control;agar_control;25C_control
3.02576	3.77692	-3.77692	-3.28667	1.85627	-1.61221		+	Cluster 415		17	46.5	46.282	0	92.198	1409300000	173	4.07039	0.015514	AFT93397.1	NADH dehydrogenase I, F subunit [Francisella tularensis subsp. holarctica FSC200]	FTS_1782	nuoF		Energy production and conversion	C	COG1894	NuoF	NADH:ubiquinone oxidoreductase, NADH-binding 51 kD subunit (chain F)	Metabolic pathways;Oxidative phosphorylation	nuoF, NADH-quinone oxidoreductase subunit F [EC:1.6.5.3]	K00335	NADH dehydrogenase I, subunit F	GO:0003674;GO:0003824;GO:0005575;GO:0005623;GO:0005886;GO:0008150;GO:0008152;GO:0008901;GO:0016020;GO:0016491;GO:0016695;GO:0016699;GO:0016730;GO:0044464;GO:0044710;GO:0055114;GO:0071944	Cytoplasmic		control_42C;oxidative_42C;agar_42C;25C_42C;oxidative_lowpH;agar_lowpH;25C_lowpH;agar_control;25C_control
3.32162	4.00617	-4.00617	-3.93587	2.10867	-2.09476		+	Cluster 415		4	26.7	13.653	0	20.622	196780000	35	4.59546	0.0187139	AFT93185.1	hypothetical protein FTS_1504 [Francisella tularensis subsp. holarctica FSC200]	FTS_1504			Cell cycle control, cell division, chromosome partitioning	D	COG3116	FtsL	Cell division protein FtsL, interacts with FtsB, FtsL and FtsQ		ftsL, cell division protein FtsL	K03586			CytoplasmicMembrane		oxidative_42C;agar_42C;25C_42C;oxidative_lowpH;agar_lowpH;25C_lowpH;agar_control;25C_control
4.04213	4.04499	-2.99651	-4.04499	3.51138	-2.51401		+	Cluster 415		2	5.7	44.813	0	13.726	201810000	23	4.87161	0.0263484	AFT93237.1	cell division protein FtsW [Francisella tularensis subsp. holarctica FSC200]	FTS_1574	ftsW		Cell cycle control, cell division, chromosome partitioning	D	COG0772	FtsW	Bacterial cell division protein FtsW, lipid II flippase		ftsW, cell division protein FtsW	K03588	Essential cell division protein. Transports lipid-linked peptidoglycan precursors from the inner to the outer leaflet of the cytoplasmic membrane (By similarity)	GO:0000003;GO:0000910;GO:0003674;GO:0005215;GO:0005575;GO:0005623;GO:0005886;GO:0005887;GO:0006810;GO:0007049;GO:0008150;GO:0008360;GO:0009987;GO:0015647;GO:0015648;GO:0015835;GO:0015836;GO:0016020;GO:0016021;GO:0019954;GO:0022402;GO:0022603;GO:0022604;GO:0022892;GO:0031224;GO:0031226;GO:0032153;GO:0032155;GO:0032505;GO:0043093;GO:0044425;GO:0044459;GO:0044464;GO:0044699;GO:0044763;GO:0044765;GO:…	CytoplasmicMembrane		oxidative_42C;agar_42C;25C_42C;oxidative_lowpH;agar_lowpH;25C_lowpH;agar_control;25C_control
3.81102	4.03998	-4.03998	-3.11293	3.4647	-1.65502		+	Cluster 415		4	6.3	44.482	0	10.253	631140000	63	4.65863	0.02217	AFT92179.1	cytochrome bd-I terminal oxidase subunit II [Francisella tularensis subsp. holarctica FSC200]	FTS_0184	cydB		Energy production and conversion	C	COG1294	AppB	Cytochrome bd-type quinol oxidase, subunit 2	Metabolic pathways;Oxidative phosphorylation;Two-component system	cydB, cytochrome d ubiquinol oxidase subunit II [EC:1.10.3.14]	K00426	Cytochrome D ubiquinol oxidase, subunit II	GO:0003674;GO:0003824;GO:0005488;GO:0005506;GO:0005575;GO:0005623;GO:0005886;GO:0006091;GO:0006461;GO:0008150;GO:0008152;GO:0009055;GO:0009060;GO:0009987;GO:0015980;GO:0016020;GO:0016043;GO:0016491;GO:0016679;GO:0016682;GO:0017004;GO:0019646;GO:0020037;GO:0022607;GO:0022900;GO:0022904;GO:0032991;GO:0034622;GO:0040007;GO:0043167;GO:0043169;GO:0043234;GO:0043623;GO:0043933;GO:0044085;GO:0044237;GO:…	CytoplasmicMembrane		oxidative_42C;agar_42C;25C_42C;oxidative_lowpH;agar_lowpH;25C_lowpH;agar_control;25C_control
3.64665	3.96953	-3.96953	-2.60557	3.24864	-1.85346		+	Cluster 415		3	13	24.018	0	49.171	654850000	57	4.36789	0.0192898	AFT92598.1	DedA family protein [Francisella tularensis subsp. holarctica FSC200]	FTS_0721	dedA1		Function unknown	S	COG0586	DedA	Uncharacterized membrane protein DedA, SNARE-associated domain		dedA, membrane-associated protein	K03975	dedA (Protein	GO:0005575;GO:0005623;GO:0005886;GO:0016020;GO:0044464;GO:0071944	CytoplasmicMembrane		oxidative_lowpH;agar_lowpH;25C_lowpH;oxidative_42C;agar_42C;25C_42C;agar_control;25C_control;25C_oxidative
4.12462	4.31234	-4.31234	-3.99752	2.22244	-2.47968		+	Cluster 415		3	12.7	21.867	0	10.753	352800000	54	5.03255	0.0168182	AFT93461.1	YggT family protein [Francisella tularensis subsp. holarctica FSC200]	FTS_1871			Function unknown	S	COG0762	Ycf19	Uncharacterized conserved protein YggT, Ycf19 family		yggT, YggT family protein	K02221	integral membrane protein	GO:0005575;GO:0005623;GO:0005886;GO:0006950;GO:0006970;GO:0006972;GO:0008150;GO:0009628;GO:0009987;GO:0016020;GO:0033554;GO:0044464;GO:0044699;GO:0044763;GO:0050896;GO:0051716;GO:0071214;GO:0071470;GO:0071474;GO:0071944	CytoplasmicMembrane		oxidative_42C;agar_42C;25C_42C;oxidative_lowpH;agar_lowpH;25C_lowpH;agar_control;25C_control
3.90999	4.53066	-4.53066	-4.46611	2.92308	-2.87819		+	Cluster 415		2	7.2	29.215	0	19.077	344190000	21	5.28857	0.0159136	AFT92973.1	hypothetical protein FTS_1211 [Francisella tularensis subsp. holarctica FSC200]	FTS_1211			Function unknown	S	COG0730	YfcA	Uncharacterized membrane protein YfcA		uncharacterized protein	K07090	Sulfite exporter TauE/SafE		CytoplasmicMembrane		control_42C;oxidative_42C;agar_42C;25C_42C;control_lowpH;oxidative_lowpH;agar_lowpH;25C_lowpH;25C_control;25C_oxidative
3.66534	4.37593	-4.29382	-4.37593	1.92483	-2.6974		+	Cluster 415		6	45.3	16.868	0	128.04	1182100000	91	4.96478	0.0126259	AFT92869.1	hypothetical protein FTS_1074 [Francisella tularensis subsp. holarctica FSC200]	FTS_1074													Unknown		oxidative_42C;agar_42C;25C_42C;oxidative_lowpH;agar_lowpH;25C_lowpH;agar_control;25C_control
3.93631	4.13854	-4.13854	-3.7348	2.35872	-2.29667		+	Cluster 415		6	15.1	49.973	0	56.148	787080000	25	4.81738	0.00857642	AFT92586.1	hypothetical protein FTS_0706 [Francisella tularensis subsp. holarctica FSC200]	FTS_0706													CytoplasmicMembrane		control_42C;agar_42C;oxidative_42C;25C_42C;25C_lowpH;25C_control;25C_agar
3.2536	4.90644	-4.90644	-4.47345	2.5934	-2.28444		+	Cluster 415		77	62.1	150.01	0	323.31	6878500000	678	5.01553	0.00367442	AFT92657.1	bifunctional proline dehydrogenase/pyrroline-5-carboxylate dehydrogenase [Francisella tularensis subsp. holarctica FSC200]	FTS_0798	putA		Amino acid transport and metabolism;Energy production and conversion	C;E	COG0506;COG1012;COG4230	PutA;AdhE;PutA2	Proline dehydrogenase, Acyl-CoA reductase or other NAD-dependent aldehyde dehydrogenase, Delta 1-pyrroline-5-carboxylate dehydrogenase	Alanine, aspartate and glutamate metabolism;Arginine and proline metabolism;Biosynthesis of antibiotics;Biosynthesis of secondary metabolites;Metabolic pathways	putA, RHH-type transcriptional regulator, proline utilization regulon repressor / proline dehydrogenase / delta 1-pyrroline-5-carboxylate dehydrogenase [EC:1.5.5.2 1.2.1.88]	K13821	proline dehydrogenase, pyrroline-5-carboxylate dehydrogenase	GO:0000166;GO:0000975;GO:0000976;GO:0000984;GO:0000986;GO:0000987;GO:0001017;GO:0001067;GO:0001071;GO:0001121;GO:0001130;GO:0001131;GO:0001141;GO:0001159;GO:0001217;GO:0003674;GO:0003676;GO:0003677;GO:0003700;GO:0003824;GO:0003842;GO:0004016;GO:0004657;GO:0005488;GO:0005575;GO:0005623;GO:0005886;GO:0006082;GO:0006139;GO:0006163;GO:0006164;GO:0006171;GO:0006351;GO:0006355;GO:0006520;GO:0006536;GO:…	Cytoplasmic		control_lowpH;agar_lowpH;oxidative_lowpH;25C_lowpH;agar_42C;oxidative_42C;25C_42C;25C_control;25C_agar
4.58244	4.6767	-4.6767	-3.60241	3.24473	-2.67729		+	Cluster 415		15	53.7	31.608	0	94.182	927500000	109	5.23741	0.0163228	AFT92768.1	hypothetical protein FTS_0938 [Francisella tularensis subsp. holarctica FSC200]	FTS_0938			Posttranslational modification, protein turnover, chaperones	O							disulfide isomerase, thiol-disulfide oxidase	GO:0003674;GO:0003756;GO:0003824;GO:0005575;GO:0005623;GO:0006457;GO:0008150;GO:0008152;GO:0009987;GO:0015035;GO:0015036;GO:0016491;GO:0016667;GO:0016853;GO:0016860;GO:0016862;GO:0016864;GO:0019538;GO:0042597;GO:0043170;GO:0044237;GO:0044238;GO:0044260;GO:0044267;GO:0044464;GO:0044710;GO:0055114;GO:0071704	Unknown		oxidative_lowpH;agar_lowpH;25C_lowpH;oxidative_42C;agar_42C;25C_42C;25C_control
2.67427	4.80076	-4.80076	-3.19321	3.07897	-2.4093		+	Cluster 415		2	5.3	54.907	0	16.345	2536400000	53	4.46162	0.0273709	AFT92572.1	proton-dependent oligopeptide transporter (POT) family protein, di- or tripeptide:H+ symporter [Francisella tularensis subsp. holarctica FSC200]	FTS_0692			Amino acid transport and metabolism	E	COG3104	PTR2	Dipeptide/tripeptide permease		TC.POT, proton-dependent oligopeptide transporter, POT family	K03305	Proton-dependent permease that transports di- and tripeptides (By similarity)	GO:0003674;GO:0005215;GO:0005427;GO:0005575;GO:0005623;GO:0005886;GO:0006810;GO:0006811;GO:0006812;GO:0006818;GO:0006857;GO:0008150;GO:0008324;GO:0009987;GO:0015075;GO:0015197;GO:0015198;GO:0015291;GO:0015293;GO:0015294;GO:0015295;GO:0015322;GO:0015333;GO:0015672;GO:0015833;GO:0015992;GO:0016020;GO:0016021;GO:0022804;GO:0022857;GO:0022891;GO:0022892;GO:0022897;GO:0031224;GO:0034220;GO:0035672;GO:…	CytoplasmicMembrane		agar_42C;oxidative_42C;25C_42C;agar_lowpH;oxidative_lowpH;25C_lowpH;25C_control
2.30465	4.66415	-4.54283	-4.66415	3.26085	-2.62512		+	Cluster 415		7	37.1	21.08	0	111.19	11732000000	254	4.99208	0.0171493	AFT93457.1	hypothetical protein FTS_1864 [Francisella tularensis subsp. holarctica FSC200]	FTS_1864			Function unknown	S							Small integral membrane protein		CytoplasmicMembrane		control_lowpH;agar_lowpH;oxidative_lowpH;25C_lowpH;agar_42C;oxidative_42C;25C_42C;25C_control;25C_agar
2.85075	4.00623	-3.9837	-4.00623	2.71725	-1.78564		+	Cluster 415		5	13.3	42.677	0	5.6067	101570000	14	4.55649	0.00328395	AFT92614.1	hypothetical protein FTS_0740 [Francisella tularensis subsp. holarctica FSC200]	FTS_0740													CytoplasmicMembrane		control_lowpH;25C_lowpH;oxidative_lowpH;agar_lowpH;control_42C;25C_42C;oxidative_42C;agar_42C;agar_control;agar_25C
2.58309	4.0651	-4.0651	-3.4689	2.92755	-2.00124		+	Cluster 415		7	19.1	51.415	0	60.648	507730000	67	4.2897	0.010583	AFT92116.1	chloride channel protein [Francisella tularensis subsp. holarctica FSC200]	FTS_0090	eriC		Inorganic ion transport and metabolism	P	COG0038	ClcA	H+/Cl- antiporter ClcA		TC.CIC, chloride channel protein, CIC family	K03281	Proton-coupled chloride transporter. Functions as antiport system and exchanges two chloride ions for 1 proton. Probably acts as an electrical shunt for an outwardly-directed proton pump that is linked to amino acid decarboxylation, as part of the extreme acid resistance (XAR) response (By similarity)	GO:0003674;GO:0005215;GO:0005488;GO:0005575;GO:0005623;GO:0005886;GO:0005887;GO:0006810;GO:0006811;GO:0006812;GO:0006818;GO:0006820;GO:0006821;GO:0008150;GO:0008324;GO:0009987;GO:0015075;GO:0015077;GO:0015078;GO:0015291;GO:0015297;GO:0015298;GO:0015299;GO:0015672;GO:0015698;GO:0015706;GO:0015992;GO:0016020;GO:0016021;GO:0022804;GO:0022857;GO:0022890;GO:0022891;GO:0022892;GO:0031224;GO:0031226;GO:…	CytoplasmicMembrane		control_lowpH;oxidative_lowpH;25C_lowpH;agar_lowpH;oxidative_42C;25C_42C;agar_42C;agar_control;agar_oxidative;agar_25C
1.91126	4.35671	-3.97445	-4.35671	3.05687	-2.21373		+	Cluster 415		11	20.9	48.464	0	62.874	1934400000	158	4.53373	0.00930233	AFT92243.1	preprotein translocase subunit SecY [Francisella tularensis subsp. holarctica FSC200]	FTS_0253	secY		Intracellular trafficking, secretion, and vesicular transport	U	COG0201	SecY	Preprotein translocase subunit SecY	Bacterial secretion system;Protein export;Quorum sensing	secY, preprotein translocase subunit SecY	K03076	The central subunit of the protein translocation channel SecYEG. Consists of two halves formed by TMs 1-5 and 6-10. These two domains form a lateral gate at the front which open onto the bilayer between TMs 2 and 7, and are clamped together by SecE at the back. The channel is closed by both a pore ring composed of hydrophobic SecY resides and a short helix (helix 2A) on the extracellular side of …	GO:0005575;GO:0005576;GO:0005622;GO:0005623;GO:0005886;GO:0006810;GO:0006886;GO:0006950;GO:0006952;GO:0008104;GO:0008150;GO:0009306;GO:0009579;GO:0009607;GO:0009987;GO:0015031;GO:0016020;GO:0016021;GO:0020012;GO:0030682;GO:0031224;GO:0032940;GO:0033036;GO:0034357;GO:0034613;GO:0040007;GO:0042651;GO:0043952;GO:0044403;GO:0044413;GO:0044415;GO:0044419;GO:0044424;GO:0044425;GO:0044436;GO:0044464;GO:…	CytoplasmicMembrane		control_lowpH;42C_lowpH;25C_lowpH;oxidative_lowpH;agar_lowpH;oxidative_control;agar_control;oxidative_42C;agar_42C;agar_25C;agar_oxidative
5.9592	3.21707	-5.5383	-5.9592	4.58896	-3.30885		+	Cluster 415		17	63.5	26.945	0	187.6	4096400000	241	6.18581	0.027283	AFT92576.1	hypothetical protein FTS_0696 [Francisella tularensis subsp. holarctica FSC200]	FTS_0696			Cell wall/membrane/envelope biogenesis	M	COG1463	MlaD	ABC-type transporter Mla maintaining outer membrane lipid asymmetry, periplasmic component MlaD	ABC transporters	mlaD, phospholipid/cholesterol/gamma-HCH transport system substrate-binding protein	K02067	Mammalian cell entry related domain protein		CytoplasmicMembrane		control_lowpH;oxidative_lowpH;25C_lowpH;agar_lowpH;control_42C;oxidative_42C;25C_42C;agar_42C;25C_control;agar_control;25C_oxidative;agar_oxidative
5.9917	4.21616	-4.94703	-5.9917	3.99763	-3.57429		+	Cluster 415		11	42.9	37.161	0	80.682	588630000	111	5.93681	0.014343	AFT92194.1	von Willebrand factor type A domain-containing protein [Francisella tularensis subsp. holarctica FSC200]	FTS_0199			General function prediction only	R	COG2304	YfbK	Secreted protein containing bacterial Ig-like domain and vWFA domain		yfbK, Ca-activated chloride channel homolog	K07114	von Willebrand factor, type A		CytoplasmicMembrane		control_42C;oxidative_42C;agar_42C;25C_42C;control_lowpH;oxidative_lowpH;agar_lowpH;25C_lowpH;agar_control;25C_control;agar_oxidative;25C_oxidative
7.2287	4.20453	-4.84787	-7.2287	5.09729	-4.92169		+	Cluster 415		13	32.2	60.939	0	38.54	506560000	114	6.74024	0.00900426	AFT92197.1	hypothetical protein FTS_0202 [Francisella tularensis subsp. holarctica FSC200]	FTS_0202			Function unknown	S							BatD protein		Unknown		control_42C;oxidative_42C;25C_42C;agar_42C;oxidative_lowpH;25C_lowpH;agar_lowpH;oxidative_control;25C_control;agar_control;agar_oxidative
7.00806	6.31812	-6.39494	-7.00806	4.34242	-4.58184		+	Cluster 415		16	56.7	37.761	0	47.906	536380000	63	7.45763	0.00524878	AFT92278.1	hypothetical protein FTS_0294 [Francisella tularensis subsp. holarctica FSC200]	FTS_0294													Unknown		control_42C;oxidative_42C;agar_42C;25C_42C;control_lowpH;oxidative_lowpH;agar_lowpH;25C_lowpH;oxidative_control;agar_control;25C_control
6.93578	7.08618	-7.08618	-6.37629	4.36202	-3.99168		+	Cluster 415		60	64.4	102.7	0	323.31	38383000000	1414	7.71141	0.00314839	AFT93348.1	aconitate hydratase [Francisella tularensis subsp. holarctica FSC200]	FTS_1727	acnA		Amino acid transport and metabolism;Energy production and conversion	C;E	COG0065;COG1048	LeuC;AcnA	Homoaconitase/3-isopropylmalate dehydratase large subunit, Aconitase A	2-Oxocarboxylic acid metabolism;Biosynthesis of amino acids;Biosynthesis of antibiotics;Biosynthesis of secondary metabolites;Carbon metabolism;Citrate cycle (TCA cycle);Glyoxylate and dicarboxylate metabolism;Metabolic pathways;Microbial metabolism in diverse environments	ACO, aconitate hydratase [EC:4.2.1.3]	K01681	aconitate hydratase		Cytoplasmic		control_lowpH;oxidative_lowpH;agar_lowpH;25C_lowpH;control_42C;oxidative_42C;agar_42C;25C_42C;oxidative_control;agar_control;25C_control
6.99195	5.81855	-6.99195	-5.92428	4.96043	-5.07079		+	Cluster 415		5	8	55	0	64.034	3148600000	138	7.20877	0.0103494	AFT92658.1	amino acid transporter [Francisella tularensis subsp. holarctica FSC200]	FTS_0799			Amino acid transport and metabolism	E							amino acid		CytoplasmicMembrane		control_lowpH;agar_lowpH;oxidative_lowpH;25C_lowpH;control_42C;agar_42C;oxidative_42C;25C_42C;agar_control;oxidative_control;25C_control
5.73913	5.91777	-5.91777	-5.42514	5.46179	-2.95343		+	Cluster 415		4	17.2	10.515	0	143.9	3052000000	191	6.92589	0.0135436	AFT93258.1	hypothetical protein FTS_1602 [Francisella tularensis subsp. holarctica FSC200]	FTS_1602													CytoplasmicMembrane		control_lowpH;agar_lowpH;oxidative_lowpH;25C_lowpH;control_42C;agar_42C;oxidative_42C;25C_42C;oxidative_control;25C_control;25C_agar
5.94687	6.65274	-5.46751	-6.65274	5.31404	-3.55128		+	Cluster 415		18	43.4	54.752	0	124.4	1485400000	160	6.97979	0.00315493	AFT93345.1	two-component regulator, sensor histidine kinase [Francisella tularensis subsp. holarctica FSC200]	FTS_1721	qseC		Signal transduction mechanisms	T	COG0642	BaeS	Signal transduction histidine kinase	Quorum sensing;Two-component system	qseC, two-component system, OmpR family, sensor histidine kinase QseC [EC:2.7.13.3]	K07645	Histidine kinase	GO:0000155;GO:0000160;GO:0003674;GO:0003824;GO:0004672;GO:0004673;GO:0004871;GO:0004872;GO:0005575;GO:0005623;GO:0005886;GO:0006464;GO:0006468;GO:0006793;GO:0006796;GO:0007154;GO:0007165;GO:0008150;GO:0008152;GO:0009987;GO:0016020;GO:0016301;GO:0016310;GO:0016740;GO:0016772;GO:0016773;GO:0016775;GO:0019538;GO:0023014;GO:0023052;GO:0036211;GO:0038023;GO:0043170;GO:0043412;GO:0044237;GO:0044238;GO:…	CytoplasmicMembrane		control_lowpH;oxidative_lowpH;agar_lowpH;25C_lowpH;oxidative_42C;agar_42C;25C_42C;oxidative_control;agar_control;25C_control
5.12045	6.10987	-5.26077	-6.10987	5.21049	-3.17054		+	Cluster 415		32	58	69.654	0	323.31	10046000000	583	6.56682	0.00844053	AFT92686.1	preprotein translocase subunit SecD [Francisella tularensis subsp. holarctica FSC200]	FTS_0838	secD		Intracellular trafficking, secretion, and vesicular transport	U	COG0342	SecD	Preprotein translocase subunit SecD	Bacterial secretion system;Protein export	secD, preprotein translocase subunit SecD	K03072	Part of the Sec protein translocase complex. Interacts with the SecYEG preprotein conducting channel. SecDF uses the proton motive force (PMF) to complete protein translocation after the ATP-dependent function of SecA (By similarity)	GO:0005575;GO:0005623;GO:0005886;GO:0006810;GO:0008104;GO:0008150;GO:0009306;GO:0009987;GO:0015031;GO:0016020;GO:0032940;GO:0033036;GO:0044464;GO:0044699;GO:0044763;GO:0044765;GO:0045184;GO:0046903;GO:0051179;GO:0051234;GO:0051641;GO:0051649;GO:0071702;GO:0071944	CytoplasmicMembrane		control_lowpH;oxidative_lowpH;agar_lowpH;25C_lowpH;control_42C;oxidative_42C;agar_42C;25C_42C;oxidative_control;agar_control;25C_control
4.51895	6.2949	-5.53519	-6.2949	5.31768	-3.64938		+	Cluster 415		30	47.8	81.459	0	323.31	4597800000	401	6.61839	0.0151546	AFT92138.1	ferrous iron transport protein B [Francisella tularensis subsp. holarctica FSC200]	FTS_0125	feoB		Inorganic ion transport and metabolism	P	COG0370	FeoB	Fe2+ transport system protein B		feoB, ferrous iron transport protein B	K04759	Ferrous iron transport protein b	GO:0000041;GO:0000166;GO:0001882;GO:0001883;GO:0003674;GO:0005215;GO:0005381;GO:0005488;GO:0005525;GO:0005575;GO:0005623;GO:0005886;GO:0006810;GO:0006811;GO:0006812;GO:0006826;GO:0006950;GO:0006974;GO:0008150;GO:0008324;GO:0009987;GO:0015075;GO:0015093;GO:0015684;GO:0016020;GO:0017076;GO:0019001;GO:0022857;GO:0022890;GO:0022891;GO:0022892;GO:0030001;GO:0032549;GO:0032550;GO:0032553;GO:0032555;GO:…	CytoplasmicMembrane		42C_lowpH;control_lowpH;oxidative_lowpH;agar_lowpH;25C_lowpH;oxidative_42C;agar_42C;25C_42C;oxidative_control;agar_control;25C_control
5.34517	5.63182	-4.88617	-5.63182	4.71293	-3.3199		+	Cluster 415		5	14.6	37.641	0	25.753	497040000	53	6.38782	0.0133468	AFT93395.1	NADH dehydrogenase I, H subunit [Francisella tularensis subsp. holarctica FSC200]	FTS_1780	nuoH		Energy production and conversion	C	COG1005	NuoH	NADH:ubiquinone oxidoreductase subunit 1 (chain H)	Metabolic pathways;Oxidative phosphorylation	nuoH, NADH-quinone oxidoreductase subunit H [EC:1.6.5.3]	K00337	NDH-1 shuttles electrons from NADH, via FMN and iron- sulfur (Fe-S) centers, to quinones in the respiratory chain. The immediate electron acceptor for the enzyme in this species is believed to be ubiquinone. Couples the redox reaction to proton translocation (for every two electrons transferred, four hydrogen ions are translocated across the cytoplasmic membrane), and thus conserves the redox ene…	GO:0003674;GO:0003824;GO:0003954;GO:0005575;GO:0005622;GO:0005623;GO:0005737;GO:0005886;GO:0008150;GO:0008152;GO:0009579;GO:0016020;GO:0016491;GO:0016651;GO:0016655;GO:0034357;GO:0042716;GO:0042717;GO:0044424;GO:0044436;GO:0044444;GO:0044464;GO:0044710;GO:0050136;GO:0055114;GO:0071944	CytoplasmicMembrane		agar_42C;oxidative_42C;25C_42C;agar_control;oxidative_control;25C_control;agar_lowpH;oxidative_lowpH;25C_lowpH;25C_agar
5.10989	5.57444	-5.10932	-5.57444	4.56246	-3.10729		+	Cluster 415		13	37.4	46.463	0	60.735	2013700000	226	6.33744	0.00998507	AFT92402.1	ABC transporter, involved in lipoprotein release, permease component [Francisella tularensis subsp. holarctica FSC200]	FTS_0476	lolC		Cell wall/membrane/envelope biogenesis	M	COG4591	LolE	ABC-type transport system, involved in lipoprotein release, permease component	ABC transporters	lolC_E, lipoprotein-releasing system permease protein	K09808	Lipoprotein releasing system transmembrane protein	GO:0003674;GO:0005215;GO:0005575;GO:0005623;GO:0005886;GO:0005887;GO:0006810;GO:0008104;GO:0008150;GO:0008565;GO:0015031;GO:0016020;GO:0016021;GO:0022892;GO:0031224;GO:0031226;GO:0032991;GO:0033036;GO:0042953;GO:0042954;GO:0043234;GO:0044425;GO:0044459;GO:0044464;GO:0044699;GO:0044765;GO:0045184;GO:0051179;GO:0051234;GO:0071702;GO:0071944	CytoplasmicMembrane		lowpH_42C;control_42C;oxidative_42C;agar_42C;25C_42C;oxidative_lowpH;agar_lowpH;25C_lowpH;oxidative_control;agar_control;25C_control;25C_oxidative;25C_agar
5.40764	6.09513	-4.09887	-6.09513	4.54269	-4.04138		+	Cluster 415		26	63.7	40.009	0	323.31	10521000000	540	6.24067	0.0240587	AFT92541.1	hypothetical protein FTS_0654 [Francisella tularensis subsp. holarctica FSC200]	FTS_0654													Unknown		control_lowpH;agar_lowpH;oxidative_lowpH;25C_lowpH;control_42C;agar_42C;oxidative_42C;25C_42C;25C_control;25C_agar;25C_oxidative
4.71064	6.53523	-6.53523	-5.23913	5.49579	-5.28406		+	Cluster 415		4	25.3	20.256	0	8.8062	100480000	11	6.88247	0.00114851	AFT93087.1	translation initiation factor IF-3 [Francisella tularensis subsp. holarctica FSC200]	FTS_1374	infC		Translation, ribosomal structure and biogenesis	J	COG0290	InfC	Translation initiation factor IF-3		infC, translation initiation factor IF-3	K02520	IF-3 binds to the 30S ribosomal subunit and shifts the equilibrum between 70S ribosomes and their 50S and 30S subunits in favor of the free subunits, thus enhancing the availability of 30S subunits on which protein synthesis initiation begins (By similarity)	GO:0003674;GO:0003676;GO:0003723;GO:0003743;GO:0005488;GO:0005575;GO:0005622;GO:0005623;GO:0005737;GO:0005886;GO:0006412;GO:0006413;GO:0006950;GO:0008135;GO:0008150;GO:0008152;GO:0009058;GO:0009059;GO:0009266;GO:0009409;GO:0009628;GO:0009987;GO:0010467;GO:0016020;GO:0016043;GO:0019538;GO:0022411;GO:0032790;GO:0032984;GO:0032988;GO:0034645;GO:0040007;GO:0043021;GO:0043022;GO:0043170;GO:0043933;GO:…	Cytoplasmic		control_lowpH;agar_lowpH;oxidative_lowpH;25C_lowpH;control_42C;agar_42C;oxidative_42C;25C_42C;oxidative_control;25C_control;25C_agar;25C_oxidative
5.2966	6.86753	-6.86753	-5.32652	5.2154	-5.17517		+	Cluster 415		6	13.6	54.907	0	45.989	1225500000	118	6.938	0.012646	AFT93257.1	amino acid-polyamine-organocation family protein [Francisella tularensis subsp. holarctica FSC200]	FTS_1601			Amino acid transport and metabolism	E							Amino acid permease		CytoplasmicMembrane		control_lowpH;oxidative_lowpH;agar_lowpH;25C_lowpH;oxidative_42C;agar_42C;25C_42C;oxidative_control;agar_control;25C_control;25C_oxidative;25C_agar
4.71535	7.15521	-6.47496	-7.15521	5.35625	-4.22704		+	Cluster 415		24	51.5	61.952	0	292.01	7876500000	420	7.21904	0.00402151	AFT92171.1	membrane protein of unknown function [Francisella tularensis subsp. holarctica FSC200]	FTS_0174	yidC		Cell wall/membrane/envelope biogenesis	M	COG0706	YidC	Membrane protein insertase Oxa1/YidC/SpoIIIJ, required for the localization of integral membrane proteins	Bacterial secretion system;Protein export;Quorum sensing	yidC, YidC/Oxa1 family membrane protein insertase	K03217	Required for the insertion and or proper folding and or complex formation of integral membrane proteins into the membrane. Involved in integration of membrane proteins that insert both dependently and independently of the Sec translocase complex, as well as at least some lipoproteins. Aids folding of multispanning membrane proteins (By similarity)	GO:0003674;GO:0005215;GO:0005575;GO:0005623;GO:0005886;GO:0005887;GO:0006457;GO:0006461;GO:0006810;GO:0008104;GO:0008150;GO:0008152;GO:0008565;GO:0009987;GO:0015031;GO:0016020;GO:0016021;GO:0016043;GO:0016044;GO:0019538;GO:0022607;GO:0022892;GO:0031224;GO:0031226;GO:0032977;GO:0033036;GO:0034613;GO:0040007;GO:0043170;GO:0043933;GO:0044085;GO:0044237;GO:0044238;GO:0044260;GO:0044267;GO:0044425;GO:…	CytoplasmicMembrane		control_lowpH;oxidative_lowpH;agar_lowpH;25C_lowpH;oxidative_42C;agar_42C;25C_42C;oxidative_control;agar_control;25C_control;25C_oxidative;25C_agar
4.89731	6.85199	-5.84609	-6.85199	5.30059	-3.89286		+	Cluster 415		28	36.6	112.5	0	323.31	4380200000	450	6.89004	0.0103704	AFT93280.1	RND efflux transporter [Francisella tularensis subsp. holarctica FSC200]	FTS_1631			Defense mechanisms	V	COG0841	AcrB	Multidrug efflux pump subunit AcrB	beta-Lactam resistance;Cationic antimicrobial peptide (CAMP) resistance	acrB, multidrug efflux pump	K18138	Resistance protein	GO:0005575;GO:0005623;GO:0005886;GO:0006810;GO:0006855;GO:0008150;GO:0009987;GO:0015893;GO:0016020;GO:0042221;GO:0042493;GO:0044464;GO:0044699;GO:0044763;GO:0044765;GO:0050896;GO:0051179;GO:0051234;GO:0055085;GO:0071944	CytoplasmicMembrane		control_42C;oxidative_42C;agar_42C;25C_42C;control_lowpH;oxidative_lowpH;agar_lowpH;25C_lowpH;agar_control;25C_control;25C_oxidative;25C_agar
4.99689	6.56238	-6.56238	-6.22135	4.6346	-4.17254		+	Cluster 415		14	48.1	23.828	0	267.43	5381700000	262	6.91642	0.0143766	AFT93312.1	hypothetical protein FTS_1680 [Francisella tularensis subsp. holarctica FSC200]	FTS_1680			Function unknown	S							UPF0070 protein	GO:0005575;GO:0005623;GO:0005886;GO:0005887;GO:0009897;GO:0009986;GO:0016020;GO:0016021;GO:0031224;GO:0031226;GO:0031233;GO:0032991;GO:0043234;GO:0044425;GO:0044459;GO:0044464;GO:0071575;GO:0071944	Unknown		control_42C;oxidative_42C;agar_42C;25C_42C;oxidative_lowpH;agar_lowpH;25C_lowpH;oxidative_control;agar_control;25C_control;25C_oxidative;25C_agar
4.77812	6.72927	-6.72927	-5.91124	4.43254	-5.10225		+	Cluster 415		5	29.5	30.549	0	39.534	1309800000	84	6.81906	0.00937452	AFT92593.1	prolipoprotein diacylglyceryl transferase [Francisella tularensis subsp. holarctica FSC200]	FTS_0716	lgt		Cell wall/membrane/envelope biogenesis	M	COG0682	Lgt	Prolipoprotein diacylglyceryltransferase		lgt, phosphatidylglycerol:prolipoprotein diacylglycerol transferase [EC:2.-.-.-]	K13292	Transfers the N-acyl diglyceride group on what will become the N-terminal cysteine of membrane lipoproteins (By similarity)	GO:0003674;GO:0003824;GO:0005575;GO:0005623;GO:0005886;GO:0005887;GO:0006464;GO:0008150;GO:0008152;GO:0008961;GO:0009058;GO:0009059;GO:0009987;GO:0016020;GO:0016021;GO:0016740;GO:0016757;GO:0019538;GO:0031224;GO:0031226;GO:0034645;GO:0036211;GO:0042157;GO:0042158;GO:0043170;GO:0043412;GO:0044237;GO:0044238;GO:0044249;GO:0044260;GO:0044267;GO:0044425;GO:0044459;GO:0044464;GO:0071704;GO:0071944;GO:…	CytoplasmicMembrane		control_lowpH;oxidative_lowpH;agar_lowpH;25C_lowpH;control_42C;oxidative_42C;agar_42C;25C_42C;agar_control;25C_control;25C_oxidative
5.41206	6.50191	-6.31809	-6.50191	4.38147	-4.30556		+	Cluster 415		26	72.7	34.619	0	323.31	13061000000	558	7.05299	0.0163953	AFT92734.1	HflK-HflC membrane protein complex, HflC [Francisella tularensis subsp. holarctica FSC200]	FTS_0893	hflC		Posttranslational modification, protein turnover, chaperones	O	COG0330	HflC	Regulator of protease activity HflC, stomatin/prohibitin superfamily		hflC, membrane protease subunit HflC [EC:3.4.-.-]	K04087	hflC protein	GO:0000003;GO:0000910;GO:0003674;GO:0003824;GO:0005575;GO:0005623;GO:0005886;GO:0005887;GO:0006508;GO:0006950;GO:0007049;GO:0008150;GO:0008152;GO:0008233;GO:0009266;GO:0009408;GO:0009628;GO:0009897;GO:0009986;GO:0009987;GO:0016020;GO:0016021;GO:0016787;GO:0019222;GO:0019538;GO:0019954;GO:0022402;GO:0031224;GO:0031226;GO:0031233;GO:0032505;GO:0043086;GO:0043093;GO:0043170;GO:0044092;GO:0044237;GO:…	Unknown		oxidative_control;25C_control;agar_control;oxidative_42C;25C_42C;agar_42C;oxidative_lowpH;25C_lowpH;agar_lowpH;agar_oxidative
5.15671	4.22878	-4.86062	-4.68048	2.83004	-5.15671		+	Cluster 415		3	22	19.052	0	37.732	369740000	28	5.92532	0.004	AFT92434.1	hypothetical protein FTS_0516 [Francisella tularensis subsp. holarctica FSC200]	FTS_0516			Cell wall/membrane/envelope biogenesis	M	COG1463	MlaD	ABC-type transporter Mla maintaining outer membrane lipid asymmetry, periplasmic component MlaD	ABC transporters	mlaD, phospholipid/cholesterol/gamma-HCH transport system substrate-binding protein	K02067	Mammalian cell entry related domain protein	GO:0003674;GO:0005215;GO:0005319;GO:0005488;GO:0005543;GO:0005548;GO:0005575;GO:0005623;GO:0005886;GO:0006725;GO:0006810;GO:0006811;GO:0006820;GO:0006869;GO:0008150;GO:0008152;GO:0008289;GO:0009636;GO:0009987;GO:0010876;GO:0015711;GO:0015748;GO:0015914;GO:0016020;GO:0018970;GO:0022892;GO:0033036;GO:0042221;GO:0042537;GO:0043167;GO:0043168;GO:0044237;GO:0044464;GO:0044699;GO:0044765;GO:0050896;GO:…	Unknown		oxidative_lowpH;25C_lowpH;agar_lowpH;oxidative_control;25C_control;agar_control;oxidative_42C;25C_42C;agar_42C;agar_oxidative;agar_25C
6.37752	3.78893	-5.44826	-6.37752	3.54471	-5.90567		+	Cluster 415		17	56.2	37.853	0	185.72	3325500000	291	6.53892	0.0271111	AFT92568.1	membrane fusion protein [Francisella tularensis subsp. holarctica FSC200]	FTS_0688	emrA1		Defense mechanisms	V	COG1566	EmrA	Multidrug resistance efflux pump		emrA, membrane fusion protein, multidrug efflux system	K03543	Multidrug resistance protein		Unknown		control_42C;oxidative_42C;agar_42C;25C_42C;control_lowpH;oxidative_lowpH;agar_lowpH;25C_lowpH;agar_control;25C_control;agar_oxidative;25C_oxidative
6.00648	6.17623	-6.17623	-6.05275	3.6695	-4.37593		+	Cluster 415		4	24.8	17.476	0	36.694	5461400000	204	7.12028	0.00853913	AFT93362.1	succinate dehydrogenase, cytochrome b556 [Francisella tularensis subsp. holarctica FSC200]	FTS_1743	sdhC		Energy production and conversion	C	COG2009	SdhC	Succinate dehydrogenase/fumarate reductase, cytochrome b subunit	Biosynthesis of antibiotics;Biosynthesis of secondary metabolites;Butanoate metabolism;Carbon metabolism;Citrate cycle (TCA cycle);Metabolic pathways;Microbial metabolism in diverse environments;Oxidative phosphorylation	sdhC, succinate dehydrogenase / fumarate reductase, cytochrome b subunit	K00241	Succinate dehydrogenase, cytochrome b556 subunit	GO:0000104;GO:0003674;GO:0003824;GO:0005488;GO:0005575;GO:0005622;GO:0005623;GO:0005886;GO:0006091;GO:0006099;GO:0006461;GO:0008150;GO:0008152;GO:0008177;GO:0009055;GO:0009060;GO:0009987;GO:0015980;GO:0016020;GO:0016043;GO:0016491;GO:0016627;GO:0016635;GO:0017004;GO:0020037;GO:0022607;GO:0032991;GO:0034622;GO:0043234;GO:0043623;GO:0043933;GO:0044085;GO:0044237;GO:0044238;GO:0044424;GO:0044425;GO:…	CytoplasmicMembrane		control_42C;oxidative_42C;25C_42C;agar_42C;control_lowpH;oxidative_lowpH;25C_lowpH;agar_lowpH;25C_control;agar_control;25C_oxidative;agar_oxidative
6.28061	5.6639	-6.28061	-5.84237	3.78285	-3.73042		+	Cluster 415		14	43.7	42.296	0	157.01	1727500000	180	6.80973	0.0411353	AFT92564.1	ATP-binding cassette putrescine uptake system, ATP-binding protein [Francisella tularensis subsp. holarctica FSC200]	FTS_0682	potG		Amino acid transport and metabolism	E	COG3842	PotA	ABC-type Fe3+/spermidine/putrescine transport systems, ATPase components	ABC transporters	potG, putrescine transport system ATP-binding protein	K11076	Part of the ABC transporter complex PotABCD involved in spermidine putrescine import. Responsible for energy coupling to the transport system (By similarity)	GO:0003674;GO:0003824;GO:0005215;GO:0005575;GO:0005623;GO:0005886;GO:0006139;GO:0006152;GO:0006163;GO:0006195;GO:0006200;GO:0006725;GO:0006753;GO:0006793;GO:0006796;GO:0006807;GO:0006810;GO:0006811;GO:0006812;GO:0008150;GO:0008152;GO:0008324;GO:0009056;GO:0009116;GO:0009117;GO:0009119;GO:0009123;GO:0009125;GO:0009126;GO:0009128;GO:0009141;GO:0009143;GO:0009144;GO:0009146;GO:0009150;GO:0009154;GO:…	CytoplasmicMembrane		control_42C;oxidative_42C;25C_42C;agar_42C;oxidative_lowpH;25C_lowpH;agar_lowpH;25C_control;agar_control;agar_oxidative
6.21394	4.79607	-6.21394	-5.51201	3.39552	-4.62293		+	Cluster 415		38	58.6	69.853	0	323.31	19042000000	773	6.40608	0.0270024	AFT93195.1	hypothetical protein FTS_1516 [Francisella tularensis subsp. holarctica FSC200]	FTS_1516													CytoplasmicMembrane		oxidative_control;agar_control;25C_control;oxidative_42C;agar_42C;25C_42C;oxidative_lowpH;agar_lowpH;25C_lowpH;agar_oxidative;25C_oxidative
5.54571	5.95225	-5.84798	-5.41427	3.09791	-5.95225		+	Cluster 415		29	56.5	77.73	0	135.64	866040000	187	7.01249	0	AFT92221.1	elongation factor G [Francisella tularensis subsp. holarctica FSC200]	FTS_0231	fusA		Translation, ribosomal structure and biogenesis	J	COG0480	FusA	Translation elongation factor EF-G, a GTPase		fusA, elongation factor G	K02355	Catalyzes the GTP-dependent ribosomal translocation step during translation elongation. During this step, the ribosome changes from the pre-translocational (PRE) to the post- translocational (POST) state as the newly formed A-site-bound peptidyl-tRNA and P-site-bound deacylated tRNA move to the P and E sites, respectively. Catalyzes the coordinated movement of the two tRNA molecules, the mRNA and…	GO:0003674;GO:0003676;GO:0003723;GO:0003746;GO:0005488;GO:0005575;GO:0005622;GO:0005623;GO:0005737;GO:0006412;GO:0006414;GO:0008135;GO:0008150;GO:0008152;GO:0009058;GO:0009059;GO:0009987;GO:0010467;GO:0019538;GO:0034645;GO:0043170;GO:0044237;GO:0044238;GO:0044249;GO:0044260;GO:0044267;GO:0044424;GO:0044464;GO:0071704;GO:0097159;GO:1901363;GO:1901576	Cytoplasmic		oxidative_lowpH;agar_lowpH;25C_lowpH;oxidative_42C;agar_42C;25C_42C;agar_control;25C_control;25C_oxidative
4.75889	5.74304	-5.50598	-5.74304	3.37065	-4.25223		+	Cluster 415		10	34	49.453	0	57.798	433950000	88	6.30991	0.00655556	AFT92147.1	ABC transporter, ATP-binding protein [Francisella tularensis subsp. holarctica FSC200]	FTS_0139			Inorganic ion transport and metabolism	P	COG1116	TauB	ABC-type nitrate/sulfonate/bicarbonate transport system, ATPase component		ABC.SN.A, NitT/TauT family transport system ATP-binding protein	K02049	(ABC) transporter		CytoplasmicMembrane		oxidative_42C;agar_42C;25C_42C;oxidative_lowpH;agar_lowpH;25C_lowpH;agar_control;25C_control;25C_oxidative
4.42264	5.93121	-5.93121	-5.40929	2.948	-4.49206		+	Cluster 415		5	41.7	15.27	0	40.223	445510000	67	6.16362	0.00937759	AFT93336.1	50S ribosomal protein L11 [Francisella tularensis subsp. holarctica FSC200]	FTS_1705	rplK		Translation, ribosomal structure and biogenesis	J	COG0080	RplK	Ribosomal protein L11	Ribosome	RP-L11, large subunit ribosomal protein L11	K02867	This protein binds directly to 23S ribosomal RNA (By similarity)	GO:0003674;GO:0003735;GO:0005198;GO:0005575;GO:0005618;GO:0005623;GO:0006412;GO:0008150;GO:0008152;GO:0009058;GO:0009059;GO:0009987;GO:0010467;GO:0019538;GO:0030312;GO:0034645;GO:0040007;GO:0043170;GO:0044237;GO:0044238;GO:0044249;GO:0044260;GO:0044267;GO:0044464;GO:0071704;GO:0071944;GO:1901576	Cytoplasmic		oxidative_lowpH;agar_lowpH;25C_lowpH;oxidative_42C;agar_42C;25C_42C;oxidative_control;agar_control;25C_control;agar_oxidative;25C_oxidative
5.42989	5.49447	-4.81233	-5.49447	3.16811	-4.66121		+	Cluster 415		10	24.5	30.656	0	131.24	1318800000	116	6.43346	0.0165387	AFT92619.1	hypothetical protein FTS_0746 [Francisella tularensis subsp. holarctica FSC200]	FTS_0746			Function unknown	S							nerd domain protein		Cytoplasmic		oxidative_42C;agar_42C;25C_42C;oxidative_control;agar_control;25C_control;oxidative_lowpH;agar_lowpH;25C_lowpH
4.88288	5.10075	-5.10075	-4.65963	3.23775	-4.99655		+	Cluster 415		7	35.4	34.841	0	39.341	287660000	43	6.31033	0.00424365	AFT93294.1	fructose 1,6-bisphosphatase II [Francisella tularensis subsp. holarctica FSC200]	FTS_1656	glpX		Carbohydrate transport and metabolism	G	COG1494	GlpX	Fructose-1,6-bisphosphatase/sedoheptulose 1,7-bisphosphatase or related protein	Biosynthesis of antibiotics;Biosynthesis of secondary metabolites;Carbon metabolism;Fructose and mannose metabolism;Glycolysis / Gluconeogenesis;Metabolic pathways;Methane metabolism;Microbial metabolism in diverse environments;Pentose phosphate pathway	glpX, fructose-1,6-bisphosphatase II [EC:3.1.3.11]	K02446	Fructose-1,6-bisphosphatase	GO:0003674;GO:0003824;GO:0005488;GO:0005575;GO:0005622;GO:0005623;GO:0005737;GO:0005829;GO:0005975;GO:0005996;GO:0006006;GO:0006094;GO:0006793;GO:0006796;GO:0008150;GO:0008152;GO:0009058;GO:0009987;GO:0016051;GO:0016311;GO:0016787;GO:0016788;GO:0016791;GO:0019203;GO:0019318;GO:0019319;GO:0019637;GO:0030145;GO:0030388;GO:0042132;GO:0042578;GO:0043167;GO:0043169;GO:0044237;GO:0044238;GO:0044424;GO:…	Cytoplasmic		oxidative_42C;agar_42C;25C_42C;oxidative_control;agar_control;25C_control;agar_lowpH;25C_lowpH;agar_oxidative;25C_oxidative
5.53334	5.6448	-5.6448	-4.40431	2.98446	-5.1018		+	Cluster 415		13	24.2	47.155	0	88.955	3917600000	248	6.49505	0.0127186	AFT93364.1	major facilitator transporter [Francisella tularensis subsp. holarctica FSC200]	FTS_1745	ampG		Carbohydrate transport and metabolism;Amino acid transport and metabolism;Inorganic ion transport and metabolism;General function prediction only	E;G;P;R	COG0477	ProP	MFS family permease	beta-Lactam resistance	ampG, MFS transporter, PAT family, beta-lactamase induction signal transducer AmpG	K08218	Major Facilitator Superfamily	GO:0000270;GO:0003674;GO:0005215;GO:0005575;GO:0005623;GO:0005886;GO:0006022;GO:0006807;GO:0006810;GO:0006811;GO:0006812;GO:0006818;GO:0008150;GO:0008152;GO:0008324;GO:0009987;GO:0015075;GO:0015291;GO:0015293;GO:0015294;GO:0015295;GO:0015672;GO:0015835;GO:0015992;GO:0016020;GO:0022804;GO:0022857;GO:0022891;GO:0022892;GO:0030203;GO:0034220;GO:0043170;GO:0044464;GO:0044699;GO:0044763;GO:0044765;GO:…	CytoplasmicMembrane		control_42C;oxidative_42C;agar_42C;25C_42C;oxidative_lowpH;agar_lowpH;25C_lowpH;agar_control;25C_control;25C_oxidative
4.01824	5.27653	-5.27653	-4.58907	3.12079	-3.41856		+	Cluster 415		8	41.8	20.856	0	94.859	902090000	95	5.47772	0.0189032	AFT93132.1	Type IV pili, pilus assembly protein [Francisella tularensis subsp. holarctica FSC200]	FTS_1441	fimT		Cell motility;Intracellular trafficking, secretion, and vesicular transport;Extracellular structures	N;U;W	COG2165	PulG	Type II secretory pathway, pseudopilin PulG		fimT, type IV fimbrial biogenesis protein FimT	K08084	biogenesis protein		Unknown		control_lowpH;oxidative_lowpH;agar_lowpH;25C_lowpH;control_42C;oxidative_42C;agar_42C;25C_42C;agar_control;25C_control
4.56142	5.37832	-5.15563	-5.37832	3.88573	-2.74419		+	Cluster 415		23	60.1	54.764	0	321.42	5964200000	294	6.00271	0.013592	AFT92729.1	hypothetical protein FTS_0887 [Francisella tularensis subsp. holarctica FSC200]	FTS_0887			Posttranslational modification, protein turnover, chaperones	O	COG0760	SurA	Parvulin-like peptidyl-prolyl isomerase		ppiD, peptidyl-prolyl cis-trans isomerase D [EC:5.2.1.8]	K03770	Inherit from proNOG: cis-trans isomerase		CytoplasmicMembrane		control_42C;agar_42C;oxidative_42C;25C_42C;control_lowpH;agar_lowpH;oxidative_lowpH;25C_lowpH;25C_control
4.03359	5.58797	-5.58797	-5.3092	4.20828	-2.96388		+	Cluster 415		20	61	44.895	0	229.84	5219300000	327	6.02056	0.0140462	AFT93096.1	capsule biosynthesis protein CapB [Francisella tularensis subsp. holarctica FSC200]	FTS_1385	capB		Cell wall/membrane/envelope biogenesis	M					capB, gamma-polyglutamate synthase [EC:6.3.2.-]	K01932	Capsule biosynthesis protein		CytoplasmicMembrane		control_42C;agar_42C;oxidative_42C;25C_42C;agar_lowpH;oxidative_lowpH;25C_lowpH;oxidative_control;25C_control
3.89161	5.22449	-5.22449	-4.77387	4.18928	-2.82442		+	Cluster 415		17	59.3	33.814	0	323.31	18142000000	544	5.69568	0.0302047	AFT93468.1	periplasmic solute binding family protein [Francisella tularensis subsp. holarctica FSC200]	FTS_1883			Inorganic ion transport and metabolism	P	COG0803;COG3443	ZnuA;ZinT	ABC-type Zn uptake system ZnuABC, Zn-binding component ZnuA, Periplasmic Zn/Cd-binding protein ZinT		ABC.ZM.S, zinc/manganese transport system substrate-binding protein	K02077	Solute binding protein	GO:0005575;GO:0005623;GO:0005886;GO:0016020;GO:0044464;GO:0071944	CytoplasmicMembrane		control_42C;agar_42C;oxidative_42C;25C_42C;agar_lowpH;oxidative_lowpH;25C_lowpH;oxidative_control;25C_control
4.2755	5.86421	-5.86421	-4.9691	4.76892	-3.24315		+	Cluster 415		5	8.5	53.451	0	36.685	1324300000	89	6.09941	0.0163323	AFT93296.1	lysine:H+ symporter [Francisella tularensis subsp. holarctica FSC200]	FTS_1658	lysP		Amino acid transport and metabolism	E	COG0833	LysP	Amino acid permease		lysP, lysine-specific permease	K11733	lysine-specific permease	GO:0005575;GO:0005623;GO:0005886;GO:0006810;GO:0008150;GO:0016020;GO:0044464;GO:0051179;GO:0051234;GO:0071944	CytoplasmicMembrane		control_42C;oxidative_42C;agar_42C;25C_42C;oxidative_lowpH;agar_lowpH;25C_lowpH;oxidative_control;agar_control;25C_control
4.63267	5.48526	-5.48526	-4.38083	4.41586	-2.91636		+	Cluster 415		23	53.3	44.264	0	161.73	6060900000	383	5.81131	0.0138339	AFT93094.1	hypothetical protein FTS_1383 [Francisella tularensis subsp. holarctica FSC200]	FTS_1383													Unknown		control_42C;oxidative_42C;agar_42C;25C_42C;control_lowpH;oxidative_lowpH;agar_lowpH;25C_lowpH;agar_control;25C_control;25C_oxidative
4.60019	5.86069	-5.86069	-5.45394	3.77814	-3.27098		+	Cluster 415		29	53.6	62.103	0	160.51	2085900000	267	6.18754	0.004	AFT93154.1	cysteine/glutathione ABC transporter membrane/ATP-binding component [Francisella tularensis subsp. holarctica FSC200]	FTS_1464	cydC		Energy production and conversion;Posttranslational modification, protein turnover, chaperones	C;O	COG4987	CydC	ABC-type transport system involved in cytochrome bd biosynthesis, fused ATPase and permease components	ABC transporters	cydC, ATP-binding cassette, subfamily C, bacterial CydC	K16012	cysteine glutathione ABC transporter membrane ATP-binding	GO:0000101;GO:0003333;GO:0003674;GO:0003824;GO:0005215;GO:0005575;GO:0005623;GO:0005886;GO:0006139;GO:0006152;GO:0006163;GO:0006195;GO:0006200;GO:0006725;GO:0006753;GO:0006793;GO:0006796;GO:0006807;GO:0006810;GO:0006811;GO:0006812;GO:0006820;GO:0006857;GO:0006865;GO:0008150;GO:0008152;GO:0009056;GO:0009116;GO:0009117;GO:0009119;GO:0009123;GO:0009125;GO:0009126;GO:0009128;GO:0009141;GO:0009143;GO:…	CytoplasmicMembrane		oxidative_42C;agar_42C;25C_42C;oxidative_lowpH;agar_lowpH;25C_lowpH;oxidative_control;agar_control;25C_control;25C_oxidative
4.12181	5.58893	-5.58893	-5.12376	3.58484	-3.91912		+	Cluster 415		20	51.8	38.067	0	200.21	4542200000	315	5.90394	0.0133919	AFT93230.1	putative periplasmic protease [Francisella tularensis subsp. holarctica FSC200]	FTS_1565	sohB		Posttranslational modification, protein turnover, chaperones	O	COG0616	SppA	Periplasmic serine protease, ClpP class		sohB, serine protease SohB [EC:3.4.21.-]	K04774	peptidase	GO:0003674;GO:0003824;GO:0005575;GO:0005623;GO:0005886;GO:0006508;GO:0008150;GO:0008152;GO:0008233;GO:0016020;GO:0016787;GO:0019538;GO:0043170;GO:0044238;GO:0044464;GO:0071704;GO:0071944	CytoplasmicMembrane		control_42C;oxidative_42C;agar_42C;25C_42C;oxidative_lowpH;agar_lowpH;25C_lowpH;oxidative_control;agar_control;25C_control
4.66626	5.63233	-5.63233	-5.2848	4.09274	-3.60133		+	Cluster 415		19	75.6	17.383	0	260.1	9132500000	425	6.19869	0.0115507	AFT93374.1	F0F1 ATP synthase subunit B [Francisella tularensis subsp. holarctica FSC200]	FTS_1755	atpF		Energy production and conversion	C	COG0711	AtpF	FoF1-type ATP synthase, membrane subunit b or b'	Metabolic pathways;Oxidative phosphorylation	ATPF0B, F-type H+transporting ATPase subunit b	K02109	F(1)F(0) ATP synthase produces ATP from ADP in the presence of a proton or sodium gradient. F-type ATPases consist of two structural domains, F(1) containing the extramembraneous catalytic core and F(0) containing the membrane proton channel, linked together by a central stalk and a peripheral stalk. During catalysis, ATP synthesis in the catalytic domain of F(1) is coupled via a rotary mechanism…	GO:0003674;GO:0003824;GO:0005215;GO:0005575;GO:0005622;GO:0005623;GO:0005886;GO:0006139;GO:0006152;GO:0006163;GO:0006164;GO:0006195;GO:0006200;GO:0006725;GO:0006753;GO:0006754;GO:0006793;GO:0006796;GO:0006807;GO:0006810;GO:0006811;GO:0006812;GO:0006818;GO:0008150;GO:0008152;GO:0008324;GO:0009056;GO:0009058;GO:0009116;GO:0009117;GO:0009119;GO:0009123;GO:0009124;GO:0009125;GO:0009126;GO:0009127;GO:…	CytoplasmicMembrane		control_42C;oxidative_42C;agar_42C;25C_42C;oxidative_lowpH;agar_lowpH;25C_lowpH;agar_control;25C_control;25C_oxidative
4.55983	5.61824	-5.61824	-4.74321	3.87159	-3.3574		+	Cluster 415		3	10.1	45.842	0	6.5513	669170000	36	5.8545	0.00929183	AFT92066.1	serine permease [Francisella tularensis subsp. holarctica FSC200]	FTS_0023	sdaC		Amino acid transport and metabolism	E	COG0814	SdaC	Amino acid permease		sdaC, serine transporter	K03837	Serine transporter	GO:0005575;GO:0005623;GO:0005886;GO:0005887;GO:0016020;GO:0016021;GO:0031224;GO:0031226;GO:0044425;GO:0044459;GO:0044464;GO:0071944	CytoplasmicMembrane		control_42C;oxidative_42C;agar_42C;25C_42C;oxidative_lowpH;agar_lowpH;25C_lowpH;agar_control;25C_control;25C_oxidative
4.46873	5.91837	-5.91837	-4.70246	4.25203	-3.52295		+	Cluster 415		2	13.5	17.985	0	33.485	512400000	48	5.93828	0.0190456	AFT93278.1	disulfide bond formation protein [Francisella tularensis subsp. holarctica FSC200]	FTS_1629	dsbB		Posttranslational modification, protein turnover, chaperones	O	COG1495	DsbB	Disulfide bond formation protein DsbB		dsbB, disulfide bond formation protein DsbB	K03611	Disulfide bond formation protein DsbB	GO:0005575;GO:0005623;GO:0005886;GO:0016020;GO:0044464;GO:0071944	CytoplasmicMembrane		control_42C;agar_42C;oxidative_42C;25C_42C;control_lowpH;agar_lowpH;oxidative_lowpH;25C_lowpH;25C_control;25C_agar;25C_oxidative
4.07148	6.42514	-6.42514	-5.76892	4.40268	-3.48558		+	Cluster 415		12	40.4	36.152	0	118.48	1838900000	134	6.43734	0.00850877	AFT92173.1	LPS fatty acid acyltransferase [Francisella tularensis subsp. holarctica FSC200]	FTS_0176	htrB		Lipid transport and metabolism	I	COG1560	HtrB	Lauroyl/myristoyl acyltransferase	Lipopolysaccharide biosynthesis;Metabolic pathways	lpxL, Kdo2-lipid IVA lauroyltransferase [EC:2.3.1.241]	K02517	Lipid A biosynthesis lauroyl	GO:0000271;GO:0003674;GO:0003824;GO:0005575;GO:0005623;GO:0005886;GO:0005975;GO:0005976;GO:0006629;GO:0006643;GO:0006644;GO:0006664;GO:0006793;GO:0006796;GO:0008150;GO:0008152;GO:0008610;GO:0008653;GO:0008654;GO:0009058;GO:0009059;GO:0009103;GO:0009244;GO:0009245;GO:0009247;GO:0009311;GO:0009312;GO:0009987;GO:0016020;GO:0016051;GO:0016740;GO:0019637;GO:0033692;GO:0034637;GO:0034645;GO:0043170;GO:…	CytoplasmicMembrane		control_lowpH;agar_lowpH;oxidative_lowpH;25C_lowpH;control_42C;agar_42C;oxidative_42C;25C_42C;25C_control;25C_agar;25C_oxidative
3.31235	6.00506	-5.91095	-6.00506	4.30256	-3.15358		+	Cluster 415		25	70.1	40.421	0	300.13	10842000000	532	6.3233	0.00943077	AFT92733.1	HflK-HflC membrane protein complex, HflK [Francisella tularensis subsp. holarctica FSC200]	FTS_0892	hflK		Posttranslational modification, protein turnover, chaperones	O	COG0330	HflC	Regulator of protease activity HflC, stomatin/prohibitin superfamily		hflK, membrane protease subunit HflK [EC:3.4.-.-]	K04088	HflK protein	GO:0000003;GO:0000910;GO:0003674;GO:0003824;GO:0005575;GO:0005623;GO:0005886;GO:0005887;GO:0006508;GO:0006950;GO:0007049;GO:0008150;GO:0008152;GO:0008233;GO:0009266;GO:0009408;GO:0009628;GO:0009897;GO:0009986;GO:0009987;GO:0016020;GO:0016021;GO:0016787;GO:0019222;GO:0019538;GO:0019954;GO:0022402;GO:0030288;GO:0030312;GO:0030313;GO:0031224;GO:0031226;GO:0031233;GO:0031975;GO:0032505;GO:0042597;GO:…	Cytoplasmic		control_lowpH;agar_lowpH;oxidative_lowpH;25C_lowpH;agar_42C;oxidative_42C;25C_42C;oxidative_control;25C_control;25C_agar
3.39793	6.1281	-5.17499	-6.1281	4.71637	-3.55852		+	Cluster 415		10	61.4	15.878	0	157.79	5337800000	247	6.11963	0.00938912	AFT92057.1	rhodanese-related sulfurtransferase [Francisella tularensis subsp. holarctica FSC200]	FTS_0009	glpe		Inorganic ion transport and metabolism	P	COG2897	SseA	3-mercaptopyruvate sulfurtransferase SseA, contains two rhodanese domains	Cysteine and methionine metabolism;Metabolic pathways;Microbial metabolism in diverse environments;Sulfur relay system	TST, thiosulfate/3-mercaptopyruvate sulfurtransferase [EC:2.8.1.1 2.8.1.2]	K01011	Rhodanese domain protein		Unknown		control_lowpH;agar_lowpH;oxidative_lowpH;25C_lowpH;agar_42C;oxidative_42C;25C_42C;oxidative_control;25C_control;25C_agar
3.50896	6.23589	-5.07005	-6.23589	5.10584	-3.4281		+	Cluster 415		19	62.4	23.778	0	253.4	2650800000	226	6.23747	0.00472362	AFT92492.1	galactosyl transferase [Francisella tularensis subsp. holarctica FSC200]	FTS_0592	wbtB		Cell wall/membrane/envelope biogenesis	M	COG2148	WcaJ	Sugar transferase involved in LPS biosynthesis (colanic, teichoic acid)		wbqP, O-antigen biosynthesis protein WbqP	K13012	transferase		CytoplasmicMembrane		control_lowpH;oxidative_lowpH;agar_lowpH;25C_lowpH;oxidative_42C;agar_42C;25C_42C;agar_control;25C_control;25C_oxidative;25C_agar
3.94116	5.74282	-4.73397	-5.74282	3.43713	-3.79661		+	Cluster 415		6	12.9	45.103	0	113.98	814630000	67	5.6775	0.00420513	AFT92659.1	major facilitator transporter [Francisella tularensis subsp. holarctica FSC200]	FTS_0800	yjhB										Major Facilitator	GO:0005575;GO:0005623;GO:0005886;GO:0016020;GO:0044464;GO:0071944	CytoplasmicMembrane		control_lowpH;agar_lowpH;oxidative_lowpH;25C_lowpH;agar_42C;oxidative_42C;25C_42C;25C_control;25C_agar;25C_oxidative
3.35225	5.70974	-4.58834	-5.70974	3.60726	-2.89869		+	Cluster 415		13	25.4	54.862	0	67.167	676850000	128	5.47601	0.014701	AFT92950.1	cardiolipin synthetase [Francisella tularensis subsp. holarctica FSC200]	FTS_1179	cls		Lipid transport and metabolism	I	COG1502	Cls	Phosphatidylserine/phosphatidylglycerophosphate/cardiolipin synthase or related enzyme	Glycerophospholipid metabolism;Metabolic pathways	clsA_B, cardiolipin synthase A/B [EC:2.7.8.-]	K06131	Catalyzes the reversible phosphatidyl group transfer from one phosphatidylglycerol molecule to another to form cardiolipin (CL) (diphosphatidylglycerol) and glycerol (By similarity)	GO:0003674;GO:0003824;GO:0005575;GO:0005623;GO:0005886;GO:0006082;GO:0006629;GO:0006631;GO:0006633;GO:0008150;GO:0008152;GO:0008610;GO:0008808;GO:0009058;GO:0009987;GO:0016020;GO:0016053;GO:0016740;GO:0016772;GO:0016780;GO:0019752;GO:0030572;GO:0032787;GO:0043436;GO:0044237;GO:0044238;GO:0044249;GO:0044255;GO:0044281;GO:0044283;GO:0044464;GO:0044710;GO:0044711;GO:0046394;GO:0071704;GO:0071944;GO:…	CytoplasmicMembrane		control_lowpH;oxidative_lowpH;agar_lowpH;25C_lowpH;oxidative_42C;agar_42C;25C_42C;25C_control;25C_oxidative;25C_agar
3.37843	6.03269	-5.05751	-6.03269	3.33349	-3.35636		+	Cluster 415		11	51.1	25.292	0	59.329	287780000	52	5.76072	0.00114286	AFT93179.1	uridine kinase [Francisella tularensis subsp. holarctica FSC200]	FTS_1498	udk		Nucleotide transport and metabolism	F	COG0572	Udk	Uridine kinase	Metabolic pathways;Pyrimidine metabolism	udk, uridine kinase [EC:2.7.1.48]	K00876	Uridine monophosphokinase	GO:0003674;GO:0003824;GO:0004849;GO:0005575;GO:0005622;GO:0005623;GO:0005737;GO:0006139;GO:0006213;GO:0006220;GO:0006221;GO:0006222;GO:0006725;GO:0006753;GO:0006793;GO:0006796;GO:0006807;GO:0008150;GO:0008152;GO:0009058;GO:0009116;GO:0009117;GO:0009119;GO:0009123;GO:0009124;GO:0009129;GO:0009130;GO:0009156;GO:0009161;GO:0009163;GO:0009165;GO:0009173;GO:0009174;GO:0009218;GO:0009220;GO:0009259;GO:…	Cytoplasmic		oxidative_lowpH;25C_lowpH;agar_lowpH;oxidative_control;25C_control;agar_control;25C_42C;agar_42C;agar_oxidative
5.54921	4.93622	-3.84762	-5.54921	3.46891	-4.25007		+	Cluster 415		24	39.7	64.275	0	226.1	9294000000	335	5.84372	0.0162446	AFT92180.1	cytochrome bd-I terminal oxidase subunit I [Francisella tularensis subsp. holarctica FSC200]	FTS_0185	cydA		Energy production and conversion	C	COG1271	AppC	Cytochrome bd-type quinol oxidase, subunit 1	Metabolic pathways;Oxidative phosphorylation;Two-component system	cydA, cytochrome d ubiquinol oxidase subunit I [EC:1.10.3.14]	K00425	(Ubiquinol oxidase) subunit I	GO:0003674;GO:0003824;GO:0005488;GO:0005575;GO:0005618;GO:0005623;GO:0005886;GO:0006091;GO:0006461;GO:0008150;GO:0008152;GO:0009055;GO:0009060;GO:0009987;GO:0015980;GO:0016020;GO:0016043;GO:0016491;GO:0016679;GO:0016682;GO:0017004;GO:0019646;GO:0020037;GO:0022607;GO:0022900;GO:0022904;GO:0030312;GO:0032991;GO:0034622;GO:0043234;GO:0043623;GO:0043933;GO:0044085;GO:0044237;GO:0044464;GO:0044710;GO:…	CytoplasmicMembrane		oxidative_lowpH;agar_lowpH;25C_lowpH;oxidative_control;agar_control;25C_control;oxidative_42C;agar_42C;25C_42C
4.11604	4.94741	-4.12231	-4.94741	3.47685	-4.23187		+	Cluster 415		5	13.9	43.813	0	25.821	334000000	59	5.60459	0.00422449	AFT93407.1	drug:H+ antiporter-1 (DHA1) family protein [Francisella tularensis subsp. holarctica FSC200]	FTS_1792			Carbohydrate transport and metabolism	G							Sugar (and other) transporter	GO:0006810;GO:0006855;GO:0008150;GO:0009987;GO:0015893;GO:0042221;GO:0042493;GO:0044699;GO:0044763;GO:0044765;GO:0050896;GO:0051179;GO:0051234;GO:0055085	CytoplasmicMembrane		control_lowpH;oxidative_lowpH;25C_lowpH;agar_lowpH;oxidative_42C;25C_42C;agar_42C;25C_control;agar_control
4.89101	4.52165	-4.58496	-4.89101	2.9958	-2.61026		+	Cluster 415		30	38.3	114.57	0	113.01	1818600000	157	5.56532	0.00927059	AFT93146.1	4Fe-4S ferredoxin, FAD dependent [Francisella tularensis subsp. holarctica FSC200]	FTS_1456			Energy production and conversion	C							Fad linked oxidase		Cytoplasmic		control_lowpH;oxidative_lowpH;25C_lowpH;agar_lowpH;oxidative_42C;25C_42C;agar_42C;25C_control;agar_control
5.20612	4.1596	-5.20612	-5.04662	3.55389	-3.31488		+	Cluster 415		3	13.8	21.611	0	30.424	1247800000	81	5.79639	0.014901	AFT92924.1	DsbB family disulfide bond formation protein [Francisella tularensis subsp. holarctica FSC200]	FTS_1147			Posttranslational modification, protein turnover, chaperones	O							membrane		CytoplasmicMembrane		control_42C;oxidative_42C;25C_42C;agar_42C;oxidative_lowpH;25C_lowpH;agar_lowpH;25C_control;agar_control
5.36609	4.90866	-5.36609	-4.50437	2.70792	-3.28944		+	Cluster 415		5	16.2	32.459	0	24.133	507500000	52	5.76367	0.0036763	AFT92311.1	4-hydroxybenzoate polyprenyltransferase [Francisella tularensis subsp. holarctica FSC200]	FTS_0349	ubiA		Coenzyme transport and metabolism	H	COG0382	UbiA	4-hydroxybenzoate polyprenyltransferase	Biosynthesis of secondary metabolites;Metabolic pathways;Ubiquinone and other terpenoid-quinone biosynthesis	ubiA, 4-hydroxybenzoate polyprenyltransferase [EC:2.5.1.39]	K03179	Synthesis of 3-octaprenyl-4-hydroxybenzoate (By similarity)	GO:0002094;GO:0003674;GO:0003824;GO:0004659;GO:0005575;GO:0005623;GO:0005886;GO:0006732;GO:0006733;GO:0006743;GO:0006744;GO:0008150;GO:0008152;GO:0008412;GO:0009058;GO:0009108;GO:0009987;GO:0016020;GO:0016740;GO:0016765;GO:0042180;GO:0042181;GO:0042375;GO:0044237;GO:0044249;GO:0044281;GO:0044283;GO:0044464;GO:0044710;GO:0044711;GO:0045426;GO:0051186;GO:0051188;GO:0071704;GO:0071944;GO:1901576;GO:…	CytoplasmicMembrane		control_42C;oxidative_42C;25C_42C;agar_42C;oxidative_lowpH;25C_lowpH;agar_lowpH;25C_control;agar_control;25C_oxidative;agar_oxidative
5.39325	3.86735	-4.36632	-5.39325	3.94834	-3.37925		+	Cluster 415		7	26.5	40.407	0	67.329	961420000	78	5.51261	0.0162698	AFT92578.1	ABC transporter membrane protein [Francisella tularensis subsp. holarctica FSC200]	FTS_0698			Cell wall/membrane/envelope biogenesis	M	COG0767	MlaE	ABC-type transporter Mla maintaining outer membrane lipid asymmetry, permease component MlaE	ABC transporters	mlaE, phospholipid/cholesterol/gamma-HCH transport system permease protein	K02066	ABC transporter (Permease)	GO:0003674;GO:0003824;GO:0005215;GO:0005575;GO:0006139;GO:0006152;GO:0006163;GO:0006195;GO:0006200;GO:0006725;GO:0006753;GO:0006793;GO:0006796;GO:0006807;GO:0006810;GO:0008150;GO:0008152;GO:0009056;GO:0009116;GO:0009117;GO:0009119;GO:0009123;GO:0009125;GO:0009126;GO:0009128;GO:0009141;GO:0009143;GO:0009144;GO:0009146;GO:0009150;GO:0009154;GO:0009158;GO:0009161;GO:0009164;GO:0009166;GO:0009167;GO:…	CytoplasmicMembrane		control_lowpH;25C_lowpH;oxidative_lowpH;agar_lowpH;25C_42C;oxidative_42C;agar_42C;25C_control;oxidative_control;agar_control
4.30523	4.62641	-4.44202	-4.74674	4.74674	-2.23952		+	Cluster 415		23	45.7	53.442	0	195.08	7571300000	418	5.80562	0.0242927	AFT92677.1	methionine uptake transporter (MUT) family protein, membrane and periplasmic protein [Francisella tularensis subsp. holarctica FSC200]	FTS_0827	metlQ		Inorganic ion transport and metabolism;Amino acid transport and metabolism	E;P	COG1464;COG2011	NlpA;MetP	ABC-type metal ion transport system, periplasmic component/surface antigen, ABC-type methionine transport system, permease component	ABC transporters	metQ, D-methionine transport system substrate-binding protein, metI, D-methionine transport system permease protein	K02072	(Lipo)protein	GO:0005575;GO:0005623;GO:0005886;GO:0009279;GO:0016020;GO:0019867;GO:0030312;GO:0030313;GO:0031975;GO:0044462;GO:0044464;GO:0071944	CytoplasmicMembrane		control_lowpH;agar_lowpH;25C_lowpH;oxidative_lowpH;control_42C;agar_42C;25C_42C;oxidative_42C;agar_control;25C_control;oxidative_control
4.2977	5.03376	-4.57745	-5.03376	4.20867	-2.3765		+	Cluster 415		6	15	40.435	0	19.644	551080000	78	5.69748	0.00930508	AFT93244.1	hypothetical protein FTS_1583 [Francisella tularensis subsp. holarctica FSC200]	FTS_1583			Function unknown	S							Aluminium activated malate transporter		CytoplasmicMembrane		control_lowpH;oxidative_lowpH;agar_lowpH;25C_lowpH;control_42C;oxidative_42C;agar_42C;25C_42C;agar_control;25C_control
5.93308	5.34731	-5.93308	-3.61556	5.12578	-3.23563		+	Cluster 415		8	52.6	26.48	0	84.749	396870000	48	6.11801	0	AFT92757.1	aldolase/adducin class II family protein [Francisella tularensis subsp. holarctica FSC200]	FTS_0922			Carbohydrate transport and metabolism	G							Class II aldolase		Cytoplasmic		lowpH_42C;control_42C;oxidative_42C;25C_42C;agar_42C;oxidative_lowpH;25C_lowpH;agar_lowpH;oxidative_control;25C_control;agar_control
4.77973	5.04973	-5.04973	-3.2568	3.45906	-3.89856		+			2	5.2	53.593	0	19.8	91279000	12	5.54837	0.00752727	AFT93301.1	K+ transporter (Trk) family protein [Francisella tularensis subsp. holarctica FSC200]	FTS_1663	trkH		Inorganic ion transport and metabolism		COG0168	TrkG	Trk-type K+ transport system, membrane component		trkH, trk system potassium uptake protein	K03498	Low-affinity potassium transport system. Interacts with Trk system potassium uptake protein TrkA (By similarity)	GO:0003674;GO:0005215;GO:0005216;GO:0005261;GO:0005267;GO:0005488;GO:0005515;GO:0005575;GO:0005623;GO:0005886;GO:0005887;GO:0006810;GO:0006811;GO:0006812;GO:0006813;GO:0008150;GO:0008324;GO:0009987;GO:0015075;GO:0015077;GO:0015079;GO:0015267;GO:0015672;GO:0016020;GO:0016021;GO:0022803;GO:0022838;GO:0022857;GO:0022890;GO:0022891;GO:0022892;GO:0030001;GO:0030955;GO:0031224;GO:0031226;GO:0031420;GO:…			oxidative_42C;agar_42C;25C_42C;oxidative_control;agar_control;25C_control;agar_lowpH;25C_lowpH
